# Supplementary material for: Metabolic reprogramming during Candida albicans planktonic-biofilm transition is modulated by the transcription factors Zcf15 and Zcf26
Source: PLOS journal article supplement (doi:10.1371/journal.pbio.3002693), 2024-06-21
Supplement: S12 (10.1371/journal.pbio.3002693.s012) [file journal.pbio.3002693.s012.xlsx]

## Sheet: Legends
S1 Data description
S1A- Wild type (CEC4665) doxycycline-treated complete transcriptome data obtained on 4 independent samples. Headers: A- Gene ID (ORF19_ID, orf19 nomenclature at the Candida albicans genome database (CGD); B-E- Wild type without doxycycline treatment count; F-I- Wild type doxycycline treated count; J-M-Wild type without doxycycline treated normalized count; N-Q-Wild type doxycycline treated normal…
S1B-Wild type (CEC4665) doxycycline-treated upregulated genes. Header: A- Gene ID (ORF19_ID, orf19 nomenclature at the Candida albicans genome database (CGD); B-E- Wild type without doxycycline trated count; F-I- Wild type doxycycline treated count; J-M-Wild type without doxycycline treated normalized count; N-Q-Wild type doxycycline treated normalized count; R-Base mean over all samples; S-Wild …
S1C- Wild type (CEC4665) doxycycline-treated downregulated genes. Header: A- Gene ID (ORF19_ID, orf19 nomenclature at the Candida albicans genome database (CGD); B-E- Wild type without doxycycline treated count; F-I- wild type doxycycline treated count; J-M-Wild type without doxycycline treated normalized count; N-Q-Wild type doxycycline treated normalized count; R-Base mean over all samples; S-W…
S1D- PTET-ZCF15 doxycycline-treated complete transcriptome data. Header: A- Gene ID (ORF19_ID, orf19 nomenclature at the Candida albicans genome database (CGD); B-E- Wild type doxycycline treated count; F-I- ZCF15 overexpression count; J-M-Wild type normalized count; N-Q-ZCF15 overexpression normalized count; R-Base mean over all samples; S-Wild type base mean; T- ZCF15 overexpression mean; U-Fol…
S1E- PTET-ZCF26 doxycycline-treated complete transcriptome data. Header: A- Gene ID (ORF19_ID, orf19 nomenclature at the Candida albicans genome database (CGD); B-E- Wild type count; F-I- ZCF26 overexpression count; J-M-wild type normalized count; N-Q-ZCF26 overexpression normalized count; R-Base mean over all samples; S-Wild type base mean; T-ZCF26 overexpression mean; U-Fold change; V-log2 Fold…
S1F- PTET-ZCF15 doxycycline-treated upregulated genes. Header: A- Gene ID (ORF19_ID, orf19 nomenclature at the Candida albicans genome database (CGD); B-E- Wild type count; F-I- ZCF15 overexpression count; J-M-Wild type normalized count; N-Q-ZCF15 overexpression normalized count; R-Base mean over all samples; S-Wild type base mean; T-ZCF15 overexpression mean; U-Fold change; V-log2FoldChange; X-p…
S1G- PTET-ZCF15 doxycycline-treated downregulated genes. Header: A- Gene ID (ORF19_ID, orf19 nomenclature at the Candida albicans genome database (CGD); B-E- Wild type count; F-I- ZCF15 overexpression count; J-M-Wild type normalized count; N-Q-ZCF15 overexpression normalized count; R-Base mean over all samples; S-Wild type base mean; T-ZCF15 overexpression mean; U-Fold change; V-log2FoldChange; X…
S1H- PTET-ZCF26 doxycycline-treated upregulated genes. Header: A- Gene ID (ORF19_ID, orf19 nomenclature at the Candida albicans genome database (CGD); B-E- Wild type count; F-I- ZCF26 overexpression count; J-M-Wild type normalized count; N-Q-ZCF26 overexpression normalized count; R-Base mean over all samples; S-Wild type base mean; T-ZCF15 overexpression mean; U-Fold change; V-log2FoldChange; X-p…
S1I- PTET-ZCF26 doxycycline-treated downregulated genes. Header: A- gene ID (ORF19_ID, orf19 nomenclature at the Candida albicans genome database (CGD); B-E- Wild type count; F-I- ZCF15 overexpression count; J-M-Wild type normalized count; N-Q-ZCF15 overexpression normalized count; R-Base mean over all samples; S-Wild type base mean; T-ZCF15 overexpression mean; U-Fold change; V-log2 FoldChange; …
S1J- TAP-Zcf15 ChIP-sequencing data. Headers: A- Chromosome number according to Assembly 22 of the C. albicans genome (CGD), start coordinate of the peak interval and, end coordinate of the peak; B-Score obtained; C-Signal Value; D-p-value; E-q-value; F- Left ORF to the binding region according to the CGD; G-Right ORF to the binding region according to the CGD.
S1K- TAP-Zcf26 ChIP sequencing data. Headers: A- Chromosome number according to Assembly 22 of the C. albicans genome (CGD), start coordinate of the peak interval and, end coordinate of the peak; B-Score obtained; C-Signal Value; D-p-value; E- q-value; F-Left ORF to the binding region according to the CGD; G-Right ORF to the binding region according to the CGD.
S1L- TAP-Zcf15 and TAP-Zcf26 bound and expression level altered genes. Headers: A- TAP-Zcf15 bound and up-regulated; B-TAP-Zcf15 bound and down-regulated; C-TAP-Zcf26 bound and up-regulated; D-TAP-Zcf26 bound and down-regulated.

## Sheet: S1A Data
Wild type doxycycline-treated complete data
Gene ID	WT1	WT2	WT3	WT4	WTdox1	WTdox2	WTdox3	Wtdox4	norm.WT1	norm.WT2	norm.WT3	norm.WT4	norm.WTdox1	norm.WTdox2	norm.WTdox3	norm.Wtdox4	baseMean	WT	WTdox	FC	log2FoldChange	stat	pvalue	padj	dispGeneEst	dispFit	dispMAP	dispersion	betaConv	maxCooks	outlier
CaalfMp02	2	0	0	4	1	3	4	3	2	0	0	3	1	3	4	4	2.08	1	3	2.029	1.021	0.963	0.335338	NA	0.190633	0.701133	0.542331	0.542331	TRUE	0.79248	No
CaalfMp03	4	6	3	8	8	6	7	5	4	8	3	7	7	6	6	7	5.84	6	6	1.248	0.32	0.569	0.569662	NA	1e-08	0.250354	0.129965	0.129965	TRUE	0.147863	No
CaalfMp04	0	0	0	0	0	0	0	0	0	0	0	0	0	0	0	0	0	0	0	NA	NA	NA	NA	NA	NA	NA	NA	NA	NA	NA	NA
CaalfMp05	20	12	19	35	23	40	27	32	18	15	19	29	20	38	24	45	26.07	20	32	1.509	0.594	1.782	0.0747897	0.119187	0.0772479	0.0576581	0.0664841	0.0664841	TRUE	0.159739	No
CaalfMp06	5	11	11	19	5	19	13	13	4	14	11	16	4	18	12	18	12.22	11	13	1.135	0.183	0.361	0.71787	NA	0.215241	0.120786	0.162115	0.162115	TRUE	0.85472	No
CaalfMp07	0	0	1	0	0	0	1	0	0	0	1	0	0	0	1	0	0.24	0	0	1.016	0.023	0.008	0.993794	NA	1e-08	6.06516	6.40278	6.40278	TRUE	0.373107	No
CaalfMp08	20	25	22	26	21	21	20	17	18	32	23	21	18	20	18	24	21.69	24	20	0.854	-0.227	-0.753	0.451297	0.537123	1e-08	0.0689017	0.0403421	0.0403421	TRUE	0.271454	No
CaalfMp08.1	0	0	0	0	0	0	0	0	0	0	0	0	0	0	0	0	0	0	0	NA	NA	NA	NA	NA	NA	NA	NA	NA	NA	NA	NA
CaalfMp08.2	0	0	0	0	0	0	0	0	0	0	0	0	0	0	0	0	0	0	0	NA	NA	NA	NA	NA	NA	NA	NA	NA	NA	NA	NA
CaalfMp08.3	0	0	0	0	0	0	0	0	0	0	0	0	0	0	0	0	0	0	0	NA	NA	NA	NA	NA	NA	NA	NA	NA	NA	NA	NA
CaalfMp08.4	0	0	0	0	0	0	0	0	0	0	0	0	0	0	0	0	0	0	0	NA	NA	NA	NA	NA	NA	NA	NA	NA	NA	NA	NA
CaalfMp09	2	1	4	1	5	5	3	2	2	1	4	1	4	5	3	3	2.82	2	4	1.861	0.896	1.074	0.282987	NA	1e-08	0.517472	0.282971	0.282971	TRUE	0.440621	No
CaalfMp10	2	0	2	2	2	1	1	0	2	0	2	2	2	1	1	0	1.13	2	1	0.67	-0.579	-0.456	0.64837	NA	1e-08	1.28573	0.673936	0.673936	TRUE	0.191411	No
CaalfMp11	72	71	78	112	80	76	97	82	65	90	80	92	68	73	87	116	83.79	82	86	1.037	0.052	0.271	0.786644	0.833244	0.0283215	0.0193059	0.0233097	0.0233097	TRUE	0.431383	No
CaalfMp11.1	0	0	0	0	0	0	0	0	0	0	0	0	0	0	0	0	0	0	0	NA	NA	NA	NA	NA	NA	NA	NA	NA	NA	NA	NA
CaalfMp12	0	0	0	0	0	0	0	0	0	0	0	0	0	0	0	0	0	0	0	NA	NA	NA	NA	NA	NA	NA	NA	NA	NA	NA	NA
CaalfMp13	7	7	4	7	5	6	10	6	6	9	4	6	4	6	9	8	6.56	6	7	1.093	0.128	0.238	0.811851	NA	1e-08	0.223431	0.124007	0.124007	TRUE	0.205874	No
CaalfMp14	9	7	3	7	3	3	5	3	8	9	3	6	3	3	4	4	4.99	6	4	0.544	-0.878	-1.386	0.165885	NA	1e-08	0.292695	0.164927	0.164927	TRUE	0.293446	No
CaalfMp15	0	0	0	0	0	0	0	0	0	0	0	0	0	0	0	0	0	0	0	NA	NA	NA	NA	NA	NA	NA	NA	NA	NA	NA	NA
CaalfMr16	2091	1662	1765	2753	1586	2242	2176	1673	1876	2116	1806	2270	1356	2139	1942	2360	1983.08	2017	1949	0.966	-0.05	-0.27	0.786947	0.833417	0.0323329	0.00271157	0.0167063	0.0323329	TRUE	0.50946	No
CaalfMr17	549	448	479	766	399	590	654	470	493	570	490	632	341	563	584	663	541.91	546	538	0.983	-0.025	-0.112	0.910507	0.933662	0.044363	0.0046584	0.02326	0.044363	TRUE	0.717948	No
CaalfMt18	0	0	0	0	0	0	0	0	0	0	0	0	0	0	0	0	0	0	0	NA	NA	NA	NA	NA	NA	NA	NA	NA	NA	NA	NA
CaalfMt19	0	0	0	0	0	0	0	0	0	0	0	0	0	0	0	0	0	0	0	NA	NA	NA	NA	NA	NA	NA	NA	NA	NA	NA	NA
CaalfMt20	0	0	0	0	0	0	0	0	0	0	0	0	0	0	0	0	0	0	0	NA	NA	NA	NA	NA	NA	NA	NA	NA	NA	NA	NA
CaalfMt21	0	0	0	0	0	0	0	0	0	0	0	0	0	0	0	0	0	0	0	NA	NA	NA	NA	NA	NA	NA	NA	NA	NA	NA	NA
CaalfMt22	0	0	0	0	0	0	0	0	0	0	0	0	0	0	0	0	0	0	0	NA	NA	NA	NA	NA	NA	NA	NA	NA	NA	NA	NA
CaalfMt23	0	0	0	0	0	0	0	0	0	0	0	0	0	0	0	0	0	0	0	NA	NA	NA	NA	NA	NA	NA	NA	NA	NA	NA	NA
CaalfMt24	0	0	0	0	0	0	0	0	0	0	0	0	0	0	0	0	0	0	0	NA	NA	NA	NA	NA	NA	NA	NA	NA	NA	NA	NA
CaalfMt25	0	0	0	0	0	0	0	0	0	0	0	0	0	0	0	0	0	0	0	NA	NA	NA	NA	NA	NA	NA	NA	NA	NA	NA	NA
CaalfMt26	0	0	0	0	0	0	1	0	0	0	0	0	0	0	1	0	0.11	0	0	1.675	0.744	0.211	0.833175	NA	1e-08	13.0169	10	10	TRUE	0.277314	No
CaalfMt27	1	0	0	0	2	0	1	0	1	0	0	0	2	0	1	0	0.44	0	1	2.286	1.193	0.551	0.581393	NA	1e-08	3.32025	2.76751	2.76751	TRUE	0.419864	No
CaalfMt28	0	0	0	0	0	0	1	0	0	0	0	0	0	0	1	0	0.11	0	0	1.675	0.744	0.211	0.833175	NA	1e-08	13.0169	10	10	TRUE	0.277314	No
CaalfMt29	0	0	0	0	0	0	0	0	0	0	0	0	0	0	0	0	0	0	0	NA	NA	NA	NA	NA	NA	NA	NA	NA	NA	NA	NA
CaalfMt30	1	0	0	0	0	0	0	0	1	0	0	0	0	0	0	0	0.11	0	0	0.616	-0.698	-0.198	0.843345	NA	1e-08	12.9476	10	10	TRUE	0.289592	No
CaalfMt31	0	0	0	0	0	0	0	0	0	0	0	0	0	0	0	0	0	0	0	NA	NA	NA	NA	NA	NA	NA	NA	NA	NA	NA	NA
CaalfMt32	0	0	0	0	0	0	0	0	0	0	0	0	0	0	0	0	0	0	0	NA	NA	NA	NA	NA	NA	NA	NA	NA	NA	NA	NA
CaalfMt33	0	0	0	0	0	0	0	0	0	0	0	0	0	0	0	0	0	0	0	NA	NA	NA	NA	NA	NA	NA	NA	NA	NA	NA	NA
CaalfMt34	0	0	0	0	0	0	0	0	0	0	0	0	0	0	0	0	0	0	0	NA	NA	NA	NA	NA	NA	NA	NA	NA	NA	NA	NA
CaalfMt35	0	0	0	0	0	0	0	0	0	0	0	0	0	0	0	0	0	0	0	NA	NA	NA	NA	NA	NA	NA	NA	NA	NA	NA	NA
CaalfMt36	0	0	0	0	0	0	0	0	0	0	0	0	0	0	0	0	0	0	0	NA	NA	NA	NA	NA	NA	NA	NA	NA	NA	NA	NA
CaalfMt37	0	0	0	0	0	0	0	0	0	0	0	0	0	0	0	0	0	0	0	NA	NA	NA	NA	NA	NA	NA	NA	NA	NA	NA	NA
CaalfMt38	0	2	0	0	0	1	1	1	0	3	0	0	0	1	1	1	0.73	1	1	1.507	0.592	0.321	0.748264	NA	1e-08	2.00325	1.71076	1.71076	TRUE	1.25693	No
CaalfMt39	0	0	0	0	0	0	0	0	0	0	0	0	0	0	0	0	0	0	0	NA	NA	NA	NA	NA	NA	NA	NA	NA	NA	NA	NA
CaalfMt40	0	0	0	0	0	0	0	0	0	0	0	0	0	0	0	0	0	0	0	NA	NA	NA	NA	NA	NA	NA	NA	NA	NA	NA	NA
CaalfMt41	0	0	0	0	0	0	0	0	0	0	0	0	0	0	0	0	0	0	0	NA	NA	NA	NA	NA	NA	NA	NA	NA	NA	NA	NA
CaalfMt42	0	0	0	0	0	0	0	0	0	0	0	0	0	0	0	0	0	0	0	NA	NA	NA	NA	NA	NA	NA	NA	NA	NA	NA	NA
CaalfMt43	0	0	0	0	0	0	0	0	0	0	0	0	0	0	0	0	0	0	0	NA	NA	NA	NA	NA	NA	NA	NA	NA	NA	NA	NA
CaalfMt44	0	0	0	0	0	0	0	0	0	0	0	0	0	0	0	0	0	0	0	NA	NA	NA	NA	NA	NA	NA	NA	NA	NA	NA	NA
CaalfMt45	0	0	0	0	0	0	0	0	0	0	0	0	0	0	0	0	0	0	0	NA	NA	NA	NA	NA	NA	NA	NA	NA	NA	NA	NA
CaalfMt46	0	0	0	0	0	0	0	0	0	0	0	0	0	0	0	0	0	0	0	NA	NA	NA	NA	NA	NA	NA	NA	NA	NA	NA	NA
CaalfMt47	0	0	0	0	0	0	0	0	0	0	0	0	0	0	0	0	0	0	0	NA	NA	NA	NA	NA	NA	NA	NA	NA	NA	NA	NA
CD39	0	0	0	0	0	0	0	0	0	0	0	0	0	0	0	0	0	0	0	NA	NA	NA	NA	NA	NA	NA	NA	NA	NA	NA	NA
ITS1	171	144	142	213	192	224	222	233	153	183	145	176	164	214	198	329	195.29	164	226	1.366	0.449	2.461	0.013839	0.0268897	0.0457158	0.0094131	0.0267202	0.0267202	TRUE	0.950839	No
ITS2	297	193	242	286	444	314	315	222	266	246	248	236	380	300	281	313	283.64	249	318	1.281	0.357	3.324	0.000887404	0.0022553	0.00789254	0.00709766	0.0075056	0.0075056	TRUE	0.205808	No
LSU-C2809	87	87	79	122	108	116	123	93	78	111	81	101	92	111	110	131	101.78	93	111	1.194	0.256	1.591	0.111562	0.167321	0.0132316	0.0162432	0.0149578	0.0149578	TRUE	0.141135	No
LSU-G1431	1	2	2	13	11	18	17	9	1	3	2	11	9	17	15	13	8.83	4	14	3.217	1.686	2.751	0.0059451	NA	0.285987	0.166349	0.206663	0.206663	TRUE	2.60679	No
orf19.10	82	68	63	71	54	62	48	40	74	87	64	59	46	59	43	56	60.97	71	51	0.723	-0.468	-2.401	0.0163664	0.0311662	0.0106721	0.0257913	0.0194746	0.0194746	TRUE	0.173834	No
orf19.100	2282	1637	2021	2498	2501	2105	2433	1417	2047	2084	2068	2060	2139	2009	2171	1999	2071.99	2065	2080	1.009	0.013	0.293	0.769548	0.820128	0.000442832	0.00268016	0.00130415	0.00130415	TRUE	0.0105513	No
orf19.1002	38	32	30	31	38	55	61	34	34	41	31	26	32	52	54	48	39.81	33	46	1.442	0.528	2.15	0.0315642	0.0561224	0.0230005	0.0384487	0.0317675	0.0317675	TRUE	0.392479	No
orf19.1005	125	103	130	146	97	115	104	76	112	131	133	120	83	110	93	107	111.17	124	98	0.788	-0.344	-2.447	0.0144155	0.0279022	1e-08	0.0150381	0.00984856	0.00984856	TRUE	0.115607	No
orf19.1007	5391	3703	4701	5650	5607	5297	5561	3619	4836	4714	4810	4659	4795	5054	4962	5104	4866.91	4755	4979	1.046	0.066	1.9	0.0573795	0.0946816	0.000339665	0.0022778	0.000934579	0.000934579	TRUE	0.00764527	No
orf19.1008	63	51	43	65	57	54	43	41	57	65	44	54	49	52	38	58	51.94	55	49	0.892	-0.165	-0.813	0.416179	0.504286	0.00456331	0.0299298	0.0202591	0.0202591	TRUE	0.186209	No
orf19.1009	127	73	88	135	100	63	92	75	114	93	90	111	86	60	82	106	92.72	102	84	0.805	-0.314	-1.8	0.0719317	0.115398	0.0190906	0.0176369	0.0182412	0.0182412	TRUE	0.31855	No
orf19.101	955	676	870	1134	1027	926	1006	703	857	861	890	935	878	884	898	992	899.21	886	913	1.026	0.037	0.623	0.533585	0.616026	0.00104577	0.00359395	0.0023081	0.0023081	TRUE	0.035543	No
orf19.1010	1835	1705	1767	2255	1853	1986	1805	1295	1646	2171	1808	1860	1585	1895	1611	1826	1800.13	1871	1729	0.924	-0.113	-1.303	0.192466	0.265736	0.010141	0.00278597	0.00669931	0.00669931	TRUE	0.13757	No
orf19.1011	2422	1732	2294	2743	2041	1971	2098	1314	2173	2205	2347	2262	1746	1881	1872	1853	2042.29	2247	1838	0.818	-0.291	-6.403	1.5193e-10	1.0701e-09	0.000733439	0.00269034	0.00148047	0.00148047	TRUE	0.0146511	No
orf19.1012	670	475	531	734	523	442	470	241	601	605	543	605	447	422	419	340	497.83	588	407	0.696	-0.522	-6.174	6.64421e-10	4.32955e-09	0.00466033	0.00489557	0.0047974	0.0047974	TRUE	0.121601	No
orf19.102	792	630	742	963	766	742	784	457	711	802	759	794	655	708	700	645	721.63	766	677	0.885	-0.176	-2.738	0.00618773	0.0130993	0.00125102	0.00399122	0.00255478	0.00255478	TRUE	0.0296268	No
orf19.1026	4778	3479	4262	5313	4451	4136	4317	2865	4286	4429	4360	4381	3807	3946	3852	4041	4137.9	4364	3912	0.896	-0.159	-4.68	2.86875e-06	1.13391e-05	0.00012294	0.00233035	0.000865877	0.000865877	TRUE	0.00556958	No
orf19.1026.1	340	277	293	392	353	299	296	186	305	353	300	323	302	285	264	262	299.29	320	278	0.875	-0.193	-2.149	0.031668	0.0562737	0.00135886	0.00682996	0.00439344	0.00439344	TRUE	0.0461188	No
orf19.1027	4014	2940	3542	4266	4527	4448	4524	2647	3601	3743	3624	3518	3872	4244	4037	3733	3796.45	3622	3972	1.098	0.135	2.875	0.0040361	0.00889	0.00151286	0.00236191	0.00184836	0.00184836	TRUE	0.025775	No
orf19.1028	1471	1250	1307	1712	2052	2048	2180	1512	1320	1591	1337	1412	1755	1954	1945	2133	1680.86	1415	1947	1.376	0.46	6.221	4.93341e-10	3.28602e-09	0.00617662	0.00284319	0.00464192	0.00464192	TRUE	0.08151	No
orf19.1029	4817	4333	4498	5876	4948	5425	5372	3297	4321	5516	4602	4845	4232	5176	4794	4650	4767.1	4821	4713	0.978	-0.032	-0.407	0.684231	0.747565	0.00772057	0.00228405	0.00582064	0.00582064	TRUE	0.113715	No
orf19.103	151	104	124	168	153	151	165	119	135	132	127	139	131	144	147	168	140.41	133	148	1.096	0.132	1.091	0.275069	0.35942	1e-08	0.0123186	0.00683379	0.00683379	TRUE	0.0725494	No
orf19.1030	29590	20295	25021	30976	26080	23650	25185	14868	26545	25838	25599	25543	22304	22566	22473	20970	23979.9	25881	22078	0.853	-0.229	-6.779	1.21352e-11	9.78637e-11	0.000674712	0.00204006	0.00105323	0.00105323	TRUE	0.0137538	No
orf19.1031	1460	1098	1346	1634	1617	1427	1672	1007	1310	1398	1377	1347	1383	1362	1492	1420	1386.12	1358	1414	1.042	0.06	1.218	0.223086	0.302074	0.000586514	0.00302684	0.0015949	0.0015949	TRUE	0.0176652	No
orf19.1032	3715	2400	3426	4119	4068	3561	3902	2678	3333	3055	3505	3397	3479	3398	3482	3777	3428.22	3322	3534	1.062	0.087	1.644	0.100185	0.153002	0.00238805	0.00240298	0.00238241	0.00238241	TRUE	0.0343525	No
orf19.1033	4421	3173	3894	4856	4691	4344	4561	2484	3966	4040	3984	4004	4012	4145	4070	3503	3965.52	3998	3932	0.985	-0.022	-0.418	0.676274	0.741163	0.00216076	0.0023456	0.00243488	0.00243488	TRUE	0.0630446	No
orf19.1034	1678	1219	1484	1802	2002	1872	1942	1091	1505	1552	1518	1486	1712	1786	1733	1539	1603.94	1515	1692	1.12	0.164	3.117	0.00182566	0.00434744	0.00133745	0.00288461	0.00202316	0.00202316	TRUE	0.0409611	No
orf19.1035	3536	2529	3233	3919	3933	3545	3802	2767	3172	3220	3308	3232	3364	3383	3393	3903	3371.57	3233	3511	1.084	0.117	2.199	0.0278497	0.0501412	0.00253527	0.00241009	0.00240778	0.00240778	TRUE	0.0661767	No
orf19.1036	1074	685	977	1202	1184	1100	1068	666	963	872	1000	991	1013	1050	953	939	972.61	956	989	1.033	0.047	0.751	0.45243	0.538151	0.00185494	0.00347211	0.00268144	0.00268144	TRUE	0.0386959	No
orf19.1037	79	62	74	102	93	97	93	52	71	79	76	84	80	93	83	73	79.76	78	82	1.066	0.092	0.592	0.554064	0.634868	1e-08	0.0201814	0.0106075	0.0106075	TRUE	0.0666414	No
orf19.1039	219	231	217	274	259	390	313	181	196	294	222	226	222	372	279	255	258.34	234	282	1.207	0.272	1.682	0.0925668	0.143409	0.0368125	0.00759885	0.0211724	0.0211724	TRUE	0.52792	No
orf19.104	233	167	223	264	252	258	310	182	209	213	228	218	216	246	277	257	232.81	217	249	1.145	0.195	1.905	0.0567891	0.0938105	0.00299688	0.00821503	0.00573592	0.00573592	TRUE	0.099355	No
orf19.1040	241	222	215	290	343	305	333	189	216	283	220	239	293	291	297	267	263.25	240	287	1.209	0.274	2.734	0.00626456	0.0132386	0.00346611	0.00749401	0.0057976	0.0057976	TRUE	0.142631	No
orf19.1041	444	372	385	518	428	512	467	354	398	474	394	427	366	489	417	499	432.94	423	443	1.044	0.062	0.58	0.562131	0.642191	0.0116144	0.00533264	0.00848707	0.00848707	TRUE	0.161851	No
orf19.1042	14649	9835	12437	15955	16601	14194	14985	10665	13142	12521	12724	13157	14198	13543	13372	15042	13462.3	12886	14039	1.089	0.123	2.79	0.00526557	0.0113227	0.0016563	0.00208736	0.00178985	0.00178985	TRUE	0.0278983	No
orf19.1043	649	600	599	750	690	794	858	434	582	764	613	618	590	758	766	612	662.85	644	682	1.061	0.086	0.79	0.429634	0.516661	0.014263	0.0041696	0.00976857	0.00976857	TRUE	0.176344	No
orf19.1045	2343	1966	2025	2570	2228	2289	2250	1022	2102	2503	2072	2119	1905	2184	2008	1441	2041.83	2199	1884	0.859	-0.22	-2.045	0.0408908	0.0703527	0.0177845	0.0026905	0.0106157	0.0106157	TRUE	0.295232	No
orf19.1047	8349	6648	7668	9292	8238	8502	8740	5130	7490	8464	7845	7662	7045	8112	7799	7235	7706.64	7865	7548	0.96	-0.059	-1.038	0.299107	0.384605	0.00341247	0.00216789	0.0029416	0.0029416	TRUE	0.031716	No
orf19.1048	736	536	626	796	564	522	546	326	660	682	640	656	482	498	487	460	570.87	660	482	0.733	-0.449	-7.209	5.63453e-13	5.33948e-12	1e-08	0.0045225	0.00193048	0.00193048	TRUE	0.0088484	No
orf19.1049	62	60	54	79	71	101	91	59	56	76	55	65	61	96	81	83	71.74	63	80	1.277	0.352	1.868	0.0617204	0.101012	0.0171398	0.0222155	0.0199751	0.0199751	TRUE	0.284104	No
orf19.105	1026	674	941	1093	1075	747	801	537	920	858	963	901	919	713	715	757	843.35	910	776	0.853	-0.23	-2.7	0.00693138	0.0144967	0.00747503	0.00370087	0.00575762	0.00575762	TRUE	0.191239	No
orf19.1050	142	160	176	211	176	207	215	110	127	204	180	174	151	198	192	155	172.52	171	174	1.022	0.031	0.206	0.836436	0.874897	0.0227329	0.0103941	0.0162092	0.0162092	TRUE	0.327824	No
orf19.1051	2990	1950	2349	2888	3102	2566	2657	2028	2682	2483	2403	2381	2653	2448	2371	2860	2535.28	2487	2583	1.037	0.053	0.803	0.422198	0.509775	0.00447848	0.00255212	0.00374791	0.00374791	TRUE	0.0609491	No
orf19.1052	1360	880	1090	1375	1519	1302	1421	1077	1220	1120	1115	1134	1299	1242	1268	1519	1239.73	1147	1332	1.157	0.211	3.061	0.00220804	0.0051719	0.00436076	0.0031505	0.00373126	0.00373126	TRUE	0.100433	No
orf19.1053	1077	828	947	1237	1174	1122	1222	701	966	1054	969	1020	1004	1071	1090	989	1020.37	1002	1038	1.039	0.055	0.971	0.331404	0.418118	0.000962562	0.00340224	0.0020748	0.0020748	TRUE	0.0136347	No
orf19.1054	313	245	289	371	413	407	451	317	281	312	296	306	353	388	402	447	348.18	299	398	1.327	0.408	4.586	4.51991e-06	1.73186e-05	0.00304976	0.00614896	0.00465788	0.00465788	TRUE	0.0699639	No
orf19.1055	1777	1195	1487	1796	2136	2050	2055	1365	1594	1521	1521	1481	1827	1956	1834	1925	1707.46	1529	1886	1.232	0.301	6.49	8.55808e-11	6.29149e-10	0.000588235	0.00282974	0.00146518	0.00146518	TRUE	0.0103143	No
orf19.1057	1522	956	1171	1433	1437	1302	1294	859	1365	1217	1198	1182	1229	1242	1155	1212	1224.96	1240	1210	0.974	-0.038	-0.633	0.526924	0.609973	0.00212389	0.00316462	0.00256047	0.00256047	TRUE	0.0570044	No
orf19.1058	4692	3314	3803	4956	3888	3456	3695	2232	4209	4219	3891	4087	3325	3298	3297	3148	3684.23	4102	3267	0.797	-0.327	-8.102	5.41882e-16	6.82522e-15	0.00062974	0.00237355	0.00128471	0.00128471	TRUE	0.0143824	No
orf19.1059	3789	2448	2836	3792	3262	2761	2890	1699	3399	3117	2902	3127	2790	2634	2579	2396	2867.94	3136	2600	0.83	-0.269	-4.43	9.41494e-06	3.43651e-05	0.00359551	0.00248571	0.00319439	0.00319439	TRUE	0.0391813	No
orf19.1060	85	84	94	134	108	88	98	56	76	107	96	110	92	84	87	79	91.58	97	86	0.886	-0.175	-1.114	0.265336	0.349362	2.84324e-05	0.0178315	0.0128853	0.0128853	TRUE	0.226094	No
orf19.1061	1956	1305	1617	1968	2149	1731	1842	953	1755	1661	1654	1623	1838	1652	1644	1344	1646.34	1673	1620	0.97	-0.044	-0.549	0.583194	0.661599	0.00799078	0.0028613	0.00561748	0.00561748	TRUE	0.150847	No
orf19.1062	89	49	83	94	92	93	78	47	80	62	85	78	79	89	70	66	76	76	76	0.995	-0.007	-0.04	0.968014	0.977523	1e-08	0.0210819	0.0135379	0.0135379	TRUE	0.118071	No
orf19.1063	446	475	433	546	409	484	453	284	400	605	443	450	350	462	404	401	439.31	474	404	0.854	-0.227	-1.81	0.0702186	0.11309	0.0211877	0.00528404	0.0128416	0.0128416	TRUE	0.379971	No
orf19.1064	5625	3909	5001	5973	4444	4108	4375	2750	5046	4977	5117	4925	3801	3920	3904	3879	4445.96	5016	3876	0.773	-0.372	-11.802	3.82334e-32	1.58418e-30	1e-08	0.00230604	0.000725211	0.000725211	TRUE	0.00220521	No
orf19.1065	1447	938	1256	1552	1289	1045	1228	786	1298	1194	1285	1280	1102	997	1096	1109	1170.12	1264	1076	0.849	-0.236	-4.33	1.48878e-05	5.28952e-05	0.000963197	0.00322017	0.00197968	0.00197968	TRUE	0.0296148	No
orf19.1066	211	153	193	222	177	164	210	89	189	195	197	183	151	156	187	126	173.17	191	155	0.821	-0.285	-2.342	0.019156	0.0357754	0.00565664	0.0103625	0.00841718	0.00841718	TRUE	0.204225	No
orf19.1067	872	702	697	927	1172	1077	1095	633	782	894	713	764	1002	1028	977	893	881.67	788	975	1.242	0.312	4.19	2.78568e-05	9.43426e-05	0.00493242	0.00362605	0.0041874	0.0041874	TRUE	0.0894045	No
orf19.1069	40819	28196	35756	43916	44639	39590	43620	27657	36619	35897	36582	36214	38177	37776	38924	39008	37399.3	36328	38471	1.059	0.083	3.467	0.000526879	0.00141443	0.000128044	0.00201834	0.000517398	0.000517398	TRUE	0.00180935	No
orf19.107	6294	4370	5684	6908	7797	7215	7799	4674	5646	5563	5815	5696	6668	6884	6959	6592	6228.21	5680	6776	1.193	0.255	7.71	1.25788e-14	1.38666e-13	0.000285431	0.00221261	0.000886006	0.000886006	TRUE	0.00404503	No
orf19.1070	264	219	230	322	338	308	366	198	237	279	235	266	289	294	327	279	275.66	254	297	1.176	0.233	2.474	0.0133434	0.0260115	0.00200483	0.00724577	0.00489326	0.00489326	TRUE	0.0515095	No
orf19.1075	127	73	82	146	116	114	110	86	114	93	84	120	99	109	98	121	104.82	103	107	1.025	0.035	0.228	0.819861	0.861141	0.00941032	0.0158285	0.0130633	0.0130633	TRUE	0.157396	No
orf19.1077	2020	1563	1801	2270	2593	2494	2552	1720	1812	1990	1843	1872	2218	2380	2277	2426	2102.12	1879	2325	1.237	0.307	6.396	1.59059e-10	1.11769e-09	0.00104647	0.00267011	0.00172983	0.00172983	TRUE	0.0178165	No
orf19.1078	2473	1910	2100	2821	2823	2775	2704	1813	2219	2432	2149	2326	2414	2648	2413	2557	2394.62	2282	2508	1.099	0.137	2.585	0.00974709	0.0196908	0.00197543	0.00258576	0.00227021	0.00227021	TRUE	0.0226217	No
orf19.1080	18	10	26	21	18	18	13	16	16	13	27	17	15	17	12	23	17.44	18	17	0.893	-0.163	-0.462	0.64377	0.713874	0.0226484	0.0852118	0.0609026	0.0609026	TRUE	0.467047	No
orf19.1082	922	775	760	1161	1029	1053	1009	606	827	987	778	957	880	1005	900	855	898.57	887	910	1.027	0.039	0.458	0.646961	0.716525	0.0078208	0.00359509	0.00583545	0.00583545	TRUE	0.0810255	No
orf19.1082.1	5977	3808	4661	5974	6626	5220	5190	4152	5362	4848	4769	4926	5667	4981	4631	5856	5129.95	4976	5284	1.061	0.086	1.16	0.246246	0.328182	0.00708002	0.00226251	0.00504589	0.00504589	TRUE	0.0845115	No
orf19.1083	782	556	629	772	682	600	640	415	702	708	644	637	583	573	571	585	625.21	673	578	0.861	-0.216	-3.415	0.000638172	0.0016743	1e-08	0.00430146	0.00224415	0.00224415	TRUE	0.0161412	No
orf19.1084	6465	4614	5723	6732	8396	8020	8317	5363	5800	5874	5855	5551	7181	7652	7422	7564	6612.36	5770	7455	1.292	0.37	10.32	5.73086e-25	1.44063e-23	0.000511374	0.00219907	0.0010778	0.0010778	TRUE	0.00813154	No
orf19.1085	765	565	679	905	966	883	971	627	686	719	695	746	826	843	866	884	783.25	712	855	1.199	0.262	4.591	4.40673e-06	1.69282e-05	1e-08	0.00383295	0.00183331	0.00183331	TRUE	0.0143291	No
orf19.1086	2367	1703	2179	2661	2821	2880	3071	2000	2123	2168	2229	2194	2413	2748	2740	2821	2429.62	2178	2680	1.229	0.297	5.483	4.18047e-08	2.14393e-07	0.00230286	0.00257702	0.00240765	0.00240765	TRUE	0.0560607	No
orf19.1087	1368	1123	1312	1586	1773	1951	2091	1119	1227	1430	1342	1308	1516	1862	1866	1578	1516.14	1327	1706	1.288	0.365	4.605	4.1298e-06	1.59152e-05	0.00695231	0.00293702	0.00534877	0.00534877	TRUE	0.070184	No
orf19.1089	1316	1403	1318	1645	1271	1531	1466	870	1181	1786	1348	1356	1087	1461	1308	1227	1344.34	1418	1271	0.897	-0.156	-1.324	0.185347	0.257767	0.0231844	0.00305938	0.0126127	0.0126127	TRUE	0.36226	No
orf19.109	1170	827	927	1230	1541	1287	1426	870	1050	1053	948	1014	1318	1228	1272	1227	1138.83	1016	1261	1.243	0.314	5.839	5.24138e-09	3.04253e-08	0.000775338	0.00325426	0.00188679	0.00188679	TRUE	0.023543	No
orf19.1090	198	148	184	231	257	213	220	170	178	188	188	190	220	203	196	240	200.49	186	215	1.147	0.198	1.932	0.0534187	0.0890756	1e-08	0.00922039	0.00510791	0.00510791	TRUE	0.0543884	No
orf19.1091	6638	5133	5886	7330	6769	6749	7154	3907	5955	6535	6022	6044	5789	6440	6384	5510	6084.9	6139	6031	0.983	-0.025	-0.425	0.671175	0.737728	0.00314191	0.0022181	0.00304662	0.00304662	TRUE	0.0402073	No
orf19.1092	809	786	810	1049	910	1083	1107	656	726	1001	829	865	778	1033	988	925	893.1	855	931	1.09	0.125	1.187	0.235237	0.316105	0.014455	0.00360498	0.0095184	0.0095184	TRUE	0.151259	No
orf19.1093	7829	5085	6754	8446	8049	6936	7919	5419	7023	6474	6910	6965	6884	6618	7066	7643	6947.89	6843	7053	1.03	0.042	0.84	0.400969	0.48948	0.00234651	0.00218846	0.00229221	0.00229221	TRUE	0.0378757	No
orf19.1095	2402	1639	2066	2631	2590	2383	2527	1772	2155	2087	2114	2170	2215	2274	2255	2499	2220.97	2132	2311	1.081	0.113	2.393	0.0167326	0.0317729	0.00109216	0.00263316	0.0016855	0.0016855	TRUE	0.0339093	No
orf19.1096	1036	929	1047	1210	1151	1313	1370	772	929	1183	1071	998	984	1253	1222	1089	1091.2	1045	1137	1.09	0.124	1.356	0.175096	0.246306	0.010125	0.00330989	0.0071401	0.0071401	TRUE	0.101857	No
orf19.1097	2757	1913	2536	2877	2298	1849	2067	1588	2473	2435	2595	2372	1965	1764	1844	2240	2211.19	2469	1953	0.79	-0.34	-4.872	1.10455e-06	4.6245e-06	0.00577424	0.00263605	0.00422472	0.00422472	TRUE	0.1127	No
orf19.11	378	225	298	351	480	348	412	230	339	286	305	289	411	332	368	324	331.81	305	359	1.179	0.238	2.416	0.0156776	0.0300258	0.00623261	0.00635463	0.00628238	0.00628238	TRUE	0.111275	No
orf19.1105	48	65	63	66	44	47	64	34	43	83	64	54	38	45	57	48	54.03	61	47	0.775	-0.369	-1.599	0.109746	0.165045	0.0359099	0.0288484	0.0320255	0.0320255	TRUE	0.272142	No
orf19.1105.2	60742	39769	52790	64073	69796	53337	58691	41323	54492	50630	54009	52835	59692	50892	52372	58282	54150.7	52992	55310	1.044	0.062	1.102	0.27045	0.354851	0.00356368	0.00200633	0.00299225	0.00299225	TRUE	0.0354197	No
orf19.1105.3	22	6	9	14	13	8	7	13	20	8	9	12	11	8	6	18	11.43	12	11	0.857	-0.222	-0.476	0.633919	NA	0.109638	0.128959	0.120779	0.120779	TRUE	0.792211	No
orf19.1106	174	149	179	242	277	302	300	195	156	190	183	200	237	288	268	275	224.53	182	267	1.464	0.55	5.047	4.49767e-07	2.00609e-06	0.00485221	0.00844493	0.00677833	0.00677833	TRUE	0.107614	No
orf19.1107	4958	3207	4098	5332	4921	4095	4409	3251	4448	4083	4193	4397	4209	3907	3934	4585	4219.46	4280	4159	0.97	-0.043	-0.757	0.449139	0.535615	0.00309443	0.00232357	0.00291003	0.00291003	TRUE	0.0562794	No
orf19.1108	3045	2228	2507	3216	3164	2859	2984	2078	2732	2836	2565	2652	2706	2728	2663	2931	2726.56	2696	2757	1.022	0.031	0.654	0.513045	0.597243	0.00135743	0.00251195	0.001793	0.001793	TRUE	0.0205676	No
orf19.1109	1838	1453	1598	2156	2217	2192	2289	1250	1649	1850	1635	1778	1896	2092	2043	1763	1838.08	1728	1948	1.13	0.176	2.707	0.0067895	0.0142328	0.00399072	0.00276932	0.00351037	0.00351037	TRUE	0.0467502	No
orf19.111	23662	16718	21817	26266	25665	23125	24607	15595	21227	21284	22321	21659	21950	22065	21958	21995	21807.4	21623	21992	1.017	0.024	0.91	0.36276	0.451515	0.000212678	0.00204609	0.000642174	0.000642174	TRUE	0.00575937	No
orf19.1110	451	327	368	481	426	377	409	270	405	416	377	397	364	360	365	381	382.98	399	368	0.921	-0.118	-1.609	0.107553	0.162275	1e-08	0.00577003	0.00258257	0.00258257	TRUE	0.0149453	No
orf19.1111	863	569	809	953	756	720	837	557	774	724	828	786	647	687	747	786	747.27	778	717	0.917	-0.125	-1.714	0.0865225	0.135301	0.00342494	0.00392219	0.00376916	0.00376916	TRUE	0.0521229	No
orf19.1112	943	740	816	1064	1208	1156	1244	727	846	942	835	877	1033	1103	1110	1025	971.48	875	1068	1.224	0.292	5.01	5.44987e-07	2.40402e-06	0.00101057	0.00347384	0.00221079	0.00221079	TRUE	0.0285132	No
orf19.1113	409	323	414	517	535	444	511	279	367	411	424	426	458	424	456	394	419.84	407	433	1.068	0.095	1.168	0.242689	0.324233	0.00240554	0.00543729	0.00397491	0.00397491	TRUE	0.0539474	No
orf19.1114	4588	3119	3883	4808	5176	4457	4583	2909	4116	3971	3973	3965	4427	4253	4090	4103	4112	4006	4218	1.053	0.075	1.935	0.0530347	0.0885325	0.000540963	0.00233256	0.00120006	0.00120006	TRUE	0.013806	No
orf19.1115	2432	1623	1886	2448	2402	2249	2357	1372	2182	2066	1930	2019	2054	2146	2103	1935	2054.34	2049	2060	1.006	0.009	0.173	0.862981	0.895787	0.00175525	0.00268617	0.00212878	0.00212878	TRUE	0.0236839	No
orf19.1116	151	102	128	171	192	165	175	110	135	130	131	141	164	157	156	155	146.28	134	158	1.177	0.235	2.088	0.0368021	0.0642567	1e-08	0.0119037	0.00528519	0.00528519	TRUE	0.0126047	No
orf19.1117	208	138	217	205	299	264	271	152	187	176	222	169	256	252	242	214	214.65	188	241	1.287	0.363	3.273	0.00106255	0.00266325	0.00502243	0.00874277	0.0071223	0.0071223	TRUE	0.154775	No
orf19.1119	1538	1303	1500	1807	2020	1955	2126	1329	1380	1659	1535	1490	1728	1865	1897	1874	1678.48	1516	1841	1.216	0.282	4.614	3.95617e-06	1.52853e-05	0.00297062	0.00284441	0.00298855	0.00298855	TRUE	0.0465065	No
orf19.1120	473	292	404	543	465	393	460	280	424	372	413	448	398	375	410	395	404.4	414	394	0.948	-0.076	-0.971	0.331306	0.418118	0.00110242	0.00556925	0.00347517	0.00347517	TRUE	0.0491948	No
orf19.1121	4397	3492	3911	5104	4245	4242	4295	2583	3945	4446	4001	4209	3630	4048	3833	3643	3969.27	4150	3788	0.914	-0.13	-2.455	0.0140946	0.0273339	0.0025028	0.00234526	0.00245591	0.00245591	TRUE	0.0272569	No
orf19.1122	74	55	65	86	60	77	79	53	66	70	67	71	51	73	70	75	67.98	68	67	0.978	-0.032	-0.182	0.85547	0.889985	1e-08	0.0233337	0.0145707	0.0145707	TRUE	0.262839	No
orf19.1123	2	0	0	4	4	0	3	1	2	0	0	3	3	0	3	1	1.58	1	2	1.406	0.492	0.392	0.694768	NA	0.781528	0.923622	0.882715	0.882715	TRUE	0.618729	No
orf19.1124	221	154	209	266	317	256	260	161	198	196	214	219	271	244	232	227	225.24	207	244	1.18	0.238	2.396	0.0165718	0.0314975	1e-08	0.00842454	0.00505582	0.00505582	TRUE	0.0676909	No
orf19.1124.2	339	236	306	340	374	215	270	183	304	300	313	280	320	205	241	258	277.76	299	256	0.856	-0.224	-1.812	0.0700452	0.112884	0.0148914	0.00720606	0.0109883	0.0109883	TRUE	0.338584	No
orf19.113	2122	1565	1904	2397	2155	2036	2074	1309	1904	1992	1948	1977	1843	1943	1851	1846	1912.91	1955	1871	0.957	-0.063	-1.531	0.125782	0.185812	1e-08	0.00273842	0.00108863	0.00108863	TRUE	0.00828708	No
orf19.1133	732	479	645	765	957	908	946	699	657	610	660	631	818	866	844	986	759.01	640	878	1.368	0.452	6.535	6.34024e-11	4.76152e-10	0.00243168	0.00389214	0.00323486	0.00323486	TRUE	0.0728232	No
orf19.1135	399	299	407	465	411	507	497	265	358	381	416	383	352	484	443	374	398.87	384	413	1.076	0.106	1.006	0.31449	0.401073	0.0106884	0.00561906	0.00819177	0.00819177	TRUE	0.153704	No
orf19.1136	152	145	107	170	197	202	173	113	136	185	109	140	168	193	154	159	155.7	142	168	1.192	0.253	1.695	0.0901662	0.140305	0.0194126	0.0113033	0.0148996	0.0148996	TRUE	0.359965	No
orf19.1137	1895	1437	1605	2189	1646	1506	1529	1031	1700	1829	1642	1805	1408	1437	1364	1454	1579.98	1744	1416	0.811	-0.302	-5.966	2.42577e-09	1.45886e-08	0.00106014	0.00289833	0.00181215	0.00181215	TRUE	0.0182989	No
orf19.1139	6494	4324	5763	7098	7250	6628	7452	4614	5826	5505	5896	5853	6200	6324	6650	6508	6095.24	5770	6420	1.112	0.153	3.999	6.3485e-05	0.00020117	0.000738512	0.00221769	0.00124276	0.00124276	TRUE	0.0112607	No
orf19.114	191	152	169	221	153	187	188	107	171	194	173	182	131	178	168	151	168.49	180	157	0.874	-0.194	-1.605	0.108397	0.163261	0.00484697	0.0105952	0.00806478	0.00806478	TRUE	0.152886	No
orf19.1140	695	578	645	790	743	743	768	459	623	736	660	651	635	709	685	647	668.47	668	669	1.006	0.009	0.128	0.897958	0.922712	0.00214568	0.0041512	0.00312184	0.00312184	TRUE	0.0511844	No
orf19.1142	1296	993	1328	1581	1322	1274	1378	853	1163	1264	1359	1304	1131	1216	1230	1203	1233.52	1272	1195	0.939	-0.091	-1.526	0.126895	0.187135	0.00218246	0.0031564	0.00259445	0.00259445	TRUE	0.0419685	No
orf19.1143	321	241	283	308	429	394	422	221	288	307	290	254	367	376	377	312	321.18	285	358	1.269	0.343	3.721	0.000198793	0.000580061	0.00324104	0.00649948	0.00503079	0.00503079	TRUE	0.072643	No
orf19.1144	756	510	689	806	730	677	738	427	678	649	705	665	624	646	659	602	653.52	674	633	0.94	-0.089	-1.474	0.14043	0.20399	1e-08	0.00420089	0.00199571	0.00199571	TRUE	0.010515	No
orf19.1146	74	36	60	77	54	42	49	38	66	46	61	63	46	40	44	54	52.58	59	46	0.76	-0.396	-2.016	0.043824	0.0749059	1e-08	0.0295865	0.017833	0.017833	TRUE	0.161726	No
orf19.1148	7	6	4	10	4	3	7	6	6	8	4	8	3	3	6	8	5.91	6	5	0.769	-0.38	-0.656	0.511876	NA	1e-08	0.247775	0.147612	0.147612	TRUE	0.227456	No
orf19.1149	2907	1843	2431	3059	2892	2328	2534	1631	2608	2346	2487	2522	2473	2221	2261	2300	2402.51	2491	2314	0.928	-0.107	-2.118	0.034145	0.0601417	0.00155059	0.00258377	0.00203554	0.00203554	TRUE	0.0270856	No
orf19.115	155	114	120	166	129	149	110	59	139	145	123	137	110	142	98	83	122.21	136	108	0.805	-0.312	-2.007	0.044781	0.0763896	0.0165964	0.0138579	0.0150142	0.0150142	TRUE	0.424839	No
orf19.1150	5105	3490	4472	5683	5702	5076	5481	3883	4580	4443	4575	4686	4877	4843	4891	5477	4796.48	4571	5022	1.097	0.134	2.837	0.00455508	0.0099167	0.00178884	0.00228218	0.00192329	0.00192329	TRUE	0.043743	No
orf19.1150.1	303	214	248	329	200	184	194	149	272	272	254	271	171	176	173	210	224.9	267	182	0.676	-0.565	-5.733	9.86152e-09	5.4506e-08	1e-08	0.0084345	0.00468493	0.00468493	TRUE	0.0896054	No
orf19.1152	39048	27680	34891	43113	55367	49905	53037	32479	35030	35240	35697	35552	47352	47618	47327	45809	41202.9	35380	47026	1.329	0.411	16.857	9.25396e-64	1.73743e-61	0.000156066	0.00201476	0.0005453	0.0005453	TRUE	0.00366634	No
orf19.1153	6250	4433	5511	6672	7748	6907	7682	4561	5607	5644	5638	5502	6626	6590	6855	6433	6111.91	5598	6626	1.185	0.245	7.616	2.61718e-14	2.78795e-13	0.000194933	0.00221704	0.000824135	0.000824135	TRUE	0.00659198	No
orf19.1154	2387	1520	1935	2377	2071	1698	1779	1223	2141	1935	1980	1960	1771	1620	1587	1725	1840.01	2004	1676	0.835	-0.26	-4.808	1.52788e-06	6.27445e-06	0.00168392	0.00276849	0.0022474	0.0022474	TRUE	0.0261473	No
orf19.1155	231	157	236	285	274	256	256	177	207	200	241	235	234	244	228	250	230.03	221	239	1.077	0.106	1.085	0.277935	0.361984	1e-08	0.00829039	0.00489504	0.00489504	TRUE	0.0390125	No
orf19.1156	201	118	173	223	208	189	220	136	180	150	177	184	178	180	196	192	179.72	173	186	1.071	0.099	0.924	0.355311	0.442886	1e-08	0.010057	0.00555357	0.00555357	TRUE	0.0700391	No
orf19.1158	392	271	325	452	458	423	417	335	352	345	333	373	392	404	372	472	380.23	351	410	1.161	0.215	2.446	0.0144259	0.0279132	0.00360685	0.00579752	0.00475501	0.00475501	TRUE	0.106294	No
orf19.1159	4107	2655	3601	4310	3963	3282	3733	2139	3684	3380	3684	3554	3389	3132	3331	3017	3396.45	3576	3217	0.9	-0.151	-3.034	0.00241461	0.00559252	0.00186856	0.00240694	0.00209654	0.00209654	TRUE	0.0203366	No
orf19.1160	1053	751	986	1209	1247	1013	1183	776	945	956	1009	997	1066	967	1056	1094	1011.21	977	1046	1.069	0.096	1.709	0.0875318	0.136631	0.000928767	0.00341514	0.00205489	0.00205489	TRUE	0.0311491	No
orf19.1161	3142	2080	2822	3256	3654	3059	3446	2090	2819	2648	2887	2685	3125	2919	3075	2948	2888.18	2760	3017	1.093	0.129	2.904	0.0036786	0.00817043	0.000903989	0.00248216	0.00154259	0.00154259	TRUE	0.0114843	No
orf19.1162	1673	1088	1334	1688	2002	1668	1764	971	1501	1385	1365	1392	1712	1592	1574	1370	1486.26	1411	1562	1.109	0.15	2.207	0.0273319	0.0494608	0.00418398	0.00295627	0.00373757	0.00373757	TRUE	0.077762	No
orf19.1162.1	538	366	499	624	502	447	444	278	483	466	511	515	429	427	396	392	452.23	494	411	0.833	-0.263	-3.654	0.000257875	0.000736364	1e-08	0.00518964	0.00274848	0.00274848	TRUE	0.0143848	No
orf19.1163	1603	1105	1327	1795	1732	1526	1683	1209	1438	1407	1358	1480	1481	1456	1502	1705	1478.37	1421	1536	1.078	0.108	1.827	0.0676727	0.10959	0.00252553	0.00296148	0.00267662	0.00267662	TRUE	0.0614015	No
orf19.1164	11158	6667	8999	11393	9610	7379	8223	5485	10010	8488	9207	9395	8219	7041	7338	7736	8429.09	9275	7584	0.817	-0.291	-4.722	2.33401e-06	9.38603e-06	0.00438984	0.00215175	0.00352453	0.00352453	TRUE	0.039555	No
orf19.1166	5310	3499	4930	5759	6185	5158	5779	3889	4764	4455	5044	4749	5290	4922	5157	5485	4983.02	4753	5214	1.096	0.132	2.68	0.0073689	0.0152927	0.00204412	0.00227085	0.00213724	0.00213724	TRUE	0.0210883	No
orf19.1167	1077	732	911	1133	898	786	808	550	966	932	932	934	768	750	721	776	847.39	941	754	0.799	-0.323	-6.053	1.42006e-09	8.8595e-09	1e-08	0.00369266	0.0015406	0.0015406	TRUE	0.0104292	No
orf19.1168	8344	5477	6868	8921	9210	7383	8350	5658	7485	6973	7027	7356	7877	7045	7451	7980	7399.21	7210	7588	1.052	0.073	1.507	0.131796	0.193507	0.00201495	0.00217572	0.00210919	0.00210919	TRUE	0.0283852	No
orf19.1169	6005	4060	5029	6121	6683	5818	6486	3468	5387	5169	5145	5047	5716	5551	5788	4891	5336.8	5187	5486	1.059	0.082	1.493	0.13531	0.197699	0.00290893	0.00225154	0.00272074	0.00272074	TRUE	0.0633459	No
orf19.117	3774	2748	3264	4190	4006	3732	4081	2527	3386	3498	3339	3455	3426	3561	3642	3564	3483.93	3420	3548	1.038	0.053	1.467	0.142367	0.206355	0.000280027	0.00239621	0.000978752	0.000978752	TRUE	0.00687816	No
orf19.1170	1820	1388	1514	1922	1777	1564	1681	1061	1633	1767	1549	1585	1520	1492	1500	1496	1567.78	1634	1502	0.921	-0.118	-2.357	0.0184411	0.0345799	0.000889188	0.00290549	0.00177718	0.00177718	TRUE	0.0340257	No
orf19.1171	43	25	43	49	30	31	29	22	39	32	44	40	26	30	26	31	33.37	39	28	0.714	-0.486	-2.055	0.0399229	0.0689442	1e-08	0.0454851	0.0230697	0.0230697	TRUE	0.0814702	No
orf19.1177	427	285	366	487	479	363	445	251	383	363	374	402	410	346	397	354	378.63	380	377	0.992	-0.012	-0.146	0.884162	0.912252	0.0018811	0.00581359	0.00392444	0.00392444	TRUE	0.0405786	No
orf19.1178	160	81	132	154	130	104	123	84	144	103	135	127	111	99	110	118	118.42	127	110	0.854	-0.228	-1.667	0.0956051	0.147319	0.00242684	0.0142387	0.0095657	0.0095657	TRUE	0.138595	No
orf19.1179	1607	975	1255	1556	1708	1222	1268	1048	1442	1241	1284	1283	1461	1166	1131	1478	1310.79	1312	1309	0.996	-0.006	-0.067	0.946382	0.961424	0.0115466	0.00308702	0.00755087	0.00755087	TRUE	0.100979	No
orf19.118	22420	17390	20316	25865	18331	17865	18334	11007	20113	22139	20785	21329	15677	17046	16360	15524	18621.8	21092	16152	0.766	-0.385	-8.731	2.51985e-18	4.04132e-17	0.00168744	0.00205748	0.00180913	0.00180913	TRUE	0.0169889	No
orf19.1180	250	154	228	262	296	209	281	190	224	196	233	216	253	199	251	268	230.12	217	243	1.111	0.151	1.375	0.169078	0.238951	0.00605554	0.00828803	0.00727866	0.00727866	TRUE	0.162426	No
orf19.1181	100	59	82	100	93	69	91	50	90	75	84	82	80	66	81	71	78.53	83	74	0.898	-0.156	-0.996	0.31902	0.405902	1e-08	0.0204644	0.0107783	0.0107783	TRUE	0.0610908	No
orf19.1182	589	383	474	636	707	608	642	405	528	488	485	524	605	580	573	571	544.28	506	582	1.148	0.199	3.064	0.00218338	0.00511614	1e-08	0.0046467	0.00223086	0.00223086	TRUE	0.0102931	No
orf19.1183	2245	1447	1899	2296	2597	2139	2513	1473	2014	1842	1943	1893	2221	2041	2242	2078	2034.29	1923	2146	1.116	0.158	3.184	0.00145376	0.00353755	0.00117733	0.00269314	0.00187968	0.00187968	TRUE	0.013847	No
orf19.1185	4199	2629	3752	4604	4333	3438	3895	2614	3767	3347	3839	3797	3706	3280	3476	3687	3612.22	3688	3537	0.958	-0.061	-1.062	0.28827	0.372697	0.00316039	0.00238141	0.00293173	0.00293173	TRUE	0.0457688	No
orf19.1186	876	571	738	875	949	727	807	481	786	727	755	722	812	694	720	678	736.65	748	726	0.974	-0.038	-0.549	0.582817	0.661296	0.00279918	0.0039502	0.00333096	0.00333096	TRUE	0.0770824	No
orf19.1187	28617	20377	26600	31787	36280	33438	37018	23905	25672	25942	27214	26212	31028	31905	33032	33716	29340.3	26260	32420	1.234	0.304	8.236	1.78573e-16	2.35277e-15	0.000957687	0.002029	0.00127298	0.00127298	TRUE	0.0102558	No
orf19.1189	22553	14642	19618	24300	27688	22718	25701	17458	20232	18641	20071	20038	23680	21677	22934	24623	21487	19746	23228	1.176	0.234	4.964	6.9172e-07	2.99413e-06	0.00207653	0.00204708	0.00208786	0.00208786	TRUE	0.0247301	No
orf19.119	299	292	298	433	255	248	254	171	268	372	305	357	218	237	227	241	278.06	326	231	0.709	-0.497	-4.438	9.06623e-06	3.32134e-05	0.00939537	0.00720036	0.00829794	0.00829794	TRUE	0.164552	No
orf19.1190	1199	934	1187	1451	1669	1433	1656	971	1076	1189	1214	1197	1427	1367	1478	1370	1289.69	1169	1410	1.209	0.273	4.942	7.72805e-07	3.32118e-06	0.00144842	0.00310514	0.00215546	0.00215546	TRUE	0.0358698	No
orf19.1191	3992	2632	3532	4199	4888	4380	4864	2929	3581	3351	3614	3463	4180	4179	4340	4131	3854.9	3502	4208	1.201	0.265	6.931	4.16592e-12	3.54516e-11	0.000472923	0.00235611	0.00113712	0.00113712	TRUE	0.00962755	No
orf19.1192	1193	772	1049	1206	745	680	680	471	1070	983	1073	994	637	649	607	664	834.73	1030	639	0.619	-0.692	-11.672	1.77159e-31	7.00243e-30	0.00070896	0.00371864	0.0021073	0.0021073	TRUE	0.0139589	No
orf19.1193	95974	62634	86423	103762	124718	104779	116396	73853	86099	79740	88419	85563	106663	99977	103864	104163	94311	84955	103667	1.22	0.287	7.21	5.61544e-13	5.32979e-12	0.00128448	0.00199492	0.00151325	0.00151325	TRUE	0.0208811	No
orf19.1195	1629	1093	1472	1683	1529	1366	1531	922	1461	1392	1506	1388	1308	1303	1366	1300	1378.04	1437	1319	0.919	-0.122	-2.535	0.0112336	0.0223555	0.000398847	0.00303298	0.00150378	0.00150378	TRUE	0.0124273	No
orf19.1196	964	711	1006	1186	1441	1320	1443	915	865	905	1029	978	1232	1260	1288	1291	1105.91	944	1268	1.341	0.423	6.913	4.75334e-12	4.0166e-11	0.00202729	0.0032922	0.00267368	0.00267368	TRUE	0.0427621	No
orf19.1198	1394	962	1224	1510	1540	1364	1439	940	1251	1225	1252	1245	1317	1301	1284	1326	1275.14	1243	1307	1.05	0.071	1.615	0.106256	0.1606	1e-08	0.00311799	0.00105736	0.00105736	TRUE	0.00171729	No
orf19.1199	27392	18670	23961	29425	22316	19379	21051	14824	24573	23769	24514	24264	19085	18491	18785	20908	21798.7	24280	19317	0.795	-0.33	-7.688	1.49516e-14	1.63326e-13	0.00163779	0.00204612	0.00172728	0.00172728	TRUE	0.0372031	No
orf19.120	250	214	282	362	197	233	206	138	224	272	289	299	168	222	184	195	231.63	271	192	0.709	-0.497	-4.093	4.26571e-05	0.000139512	0.0111972	0.00824697	0.00968923	0.00968923	TRUE	0.159216	No
orf19.1200	2496	1774	2156	2745	2386	2034	2188	1489	2239	2258	2206	2264	2041	1941	1952	2100	2125.11	2242	2008	0.895	-0.161	-3.887	0.000101386	0.000310146	0.000147429	0.00266264	0.00116507	0.00116507	TRUE	0.010111	No
orf19.1201	2292	1559	2075	2529	2793	2281	2559	1640	2056	1985	2123	2085	2389	2176	2283	2313	2176.37	2062	2290	1.11	0.15	3.376	0.000735236	0.00190565	0.000707714	0.00264655	0.00144274	0.00144274	TRUE	0.0139523	No
orf19.1202	149	96	113	163	127	142	146	113	134	122	116	134	109	135	130	159	129.96	126	133	1.041	0.058	0.421	0.673801	0.739397	0.00677695	0.01315	0.0104087	0.0104087	TRUE	0.168659	No
orf19.1203	951	619	821	947	976	831	874	523	853	788	840	781	835	793	780	738	800.9	816	786	0.966	-0.049	-0.809	0.418672	0.506471	0.000991946	0.0037921	0.00231449	0.00231449	TRUE	0.020485	No
orf19.1203.1	397	299	366	438	380	314	313	242	356	381	374	361	325	300	279	341	339.71	368	311	0.843	-0.246	-2.919	0.00351144	0.00782809	0.000815375	0.00625291	0.00385125	0.00385125	TRUE	0.0552875	No
orf19.1204	804	641	799	941	1244	1075	1232	763	721	816	817	776	1064	1026	1099	1076	924.49	782	1066	1.365	0.449	7.708	1.28068e-14	1.40922e-13	0.000893993	0.0035498	0.00214557	0.00214557	TRUE	0.0337302	No
orf19.1207	18	12	5	8	9	3	9	4	16	15	5	7	8	3	8	6	8.42	11	6	0.573	-0.803	-1.464	0.143249	NA	0.142088	0.174366	0.160442	0.160442	TRUE	0.109314	No
orf19.1208	22	23	22	35	20	20	27	19	20	29	23	29	17	19	24	27	23.43	25	22	0.858	-0.22	-0.755	0.450162	0.536239	1e-08	0.0639299	0.0385007	0.0385007	TRUE	0.140796	No
orf19.121	249	240	227	279	339	379	347	174	223	306	232	230	290	362	310	245	274.73	248	302	1.228	0.296	2.251	0.0243673	0.0445657	0.02003	0.00726363	0.0129466	0.0129466	TRUE	0.253277	No
orf19.1210	3557	2741	3348	4294	4505	4400	4617	2773	3191	3490	3425	3541	3853	4198	4120	3911	3716.12	3412	4020	1.179	0.238	4.984	6.2334e-07	2.71773e-06	0.00150607	0.00237017	0.00190964	0.00190964	TRUE	0.0235014	No
orf19.1212	621	507	631	770	804	711	753	557	557	645	646	635	688	678	672	786	663.33	621	706	1.135	0.182	2.444	0.014534	0.0280593	0.00322697	0.00416803	0.00380784	0.00380784	TRUE	0.0613459	No
orf19.1214	7571	5360	6556	8006	6763	6081	6547	3806	6792	6824	6707	6602	5784	5802	5842	5368	6215.18	6731	5699	0.848	-0.239	-6.471	9.70924e-11	7.09649e-10	0.000651758	0.0022131	0.00114156	0.00114156	TRUE	0.0176828	No
orf19.1215	11	4	8	13	11	14	3	12	10	5	8	11	9	13	3	17	9.53	8	10	1.194	0.256	0.488	0.625631	NA	0.161097	0.154323	0.157149	0.157149	TRUE	0.39081	No
orf19.1217	685	563	694	734	763	821	858	466	615	717	710	605	653	783	766	657	688.17	662	715	1.084	0.117	1.341	0.180036	0.251958	0.00688553	0.00408903	0.00582687	0.00582687	TRUE	0.0490328	No
orf19.1219	325	231	272	361	309	313	320	157	292	294	278	298	264	299	286	221	278.94	290	268	0.927	-0.109	-1.115	0.264665	0.348555	0.00322974	0.00718388	0.00553254	0.00553254	TRUE	0.122731	No
orf19.122	715	517	641	781	707	678	716	445	641	658	656	644	605	647	639	628	639.7	650	630	0.969	-0.045	-0.77	0.441154	0.527874	1e-08	0.00424888	0.00173756	0.00173756	TRUE	0.00941636	No
orf19.1220	11049	7434	9526	11595	12106	10859	12070	7778	9912	9464	9746	9561	10353	10361	10770	10970	10142.4	9671	10614	1.097	0.133	3.995	6.48003e-05	0.000205121	0.000498264	0.00212265	0.000972956	0.000972956	TRUE	0.0060372	No
orf19.1221	753	609	685	844	900	862	925	540	676	775	701	696	770	822	825	762	753.36	712	795	1.121	0.165	2.613	0.00897267	0.0182986	0.00101259	0.00390649	0.00249316	0.00249316	TRUE	0.0386351	No
orf19.1223	755	654	682	919	958	1086	1084	642	677	833	698	758	819	1036	967	905	836.73	742	932	1.259	0.333	3.826	0.000130214	0.000390186	0.00770703	0.0037145	0.00604472	0.00604472	TRUE	0.0830359	No
orf19.1224	7973	6110	7505	9584	5623	5785	5913	4173	7153	7779	7678	7903	4809	5520	5276	5886	6500.45	7628	5373	0.704	-0.507	-8.238	1.75503e-16	2.31741e-15	0.00425751	0.00220285	0.00347304	0.00347304	TRUE	0.0610851	No
orf19.1225	2012	1707	1732	2232	1597	1639	1637	937	1805	2173	1772	1841	1366	1564	1461	1322	1662.84	1898	1428	0.754	-0.407	-5.356	8.48614e-08	4.19628e-07	0.00681377	0.00285255	0.00493287	0.00493287	TRUE	0.112352	No
orf19.1227	136	122	121	167	133	120	129	76	122	155	124	138	114	115	115	107	123.67	135	113	0.843	-0.247	-1.921	0.0547896	0.0909829	1e-08	0.0137178	0.00773029	0.00773029	TRUE	0.0917566	No
orf19.1228	3268	2444	3091	3829	3775	3579	3831	2404	2932	3111	3162	3157	3228	3415	3419	3391	3226.96	3090	3363	1.088	0.122	2.95	0.00318001	0.00717982	0.00074074	0.00242939	0.00132198	0.00132198	TRUE	0.0150017	No
orf19.1229	1322	1320	1316	1720	1634	2169	2077	1214	1186	1681	1346	1418	1397	2070	1853	1712	1582.98	1408	1758	1.25	0.322	2.709	0.00675221	0.0141844	0.0227128	0.00289659	0.0129118	0.0129118	TRUE	0.233741	No
orf19.123	328	336	351	448	414	456	492	228	294	428	359	369	354	435	439	322	375.04	362	388	1.075	0.104	0.817	0.414046	0.502137	0.0202415	0.00585032	0.0128454	0.0128454	TRUE	0.187238	No
orf19.1232	3146	2836	3011	3841	3432	3901	3708	2047	2822	3611	3081	3167	2935	3722	3309	2887	3191.74	3170	3213	1.014	0.021	0.23	0.817882	0.859623	0.0105996	0.00243435	0.00749399	0.00749399	TRUE	0.138192	No
orf19.1233	10506	8480	9709	11898	9158	9322	9884	5906	9425	10796	9933	9811	7832	8895	8820	8330	9230.26	9991	8469	0.848	-0.238	-4.3	1.71167e-05	6.00686e-05	0.00322512	0.0021368	0.00283474	0.00283474	TRUE	0.0356188	No
orf19.1234	62	45	38	43	39	42	53	33	56	57	39	35	33	40	47	47	44.31	47	42	0.895	-0.161	-0.689	0.490687	0.576128	0.0220981	0.0347389	0.0292955	0.0292955	TRUE	0.184976	No
orf19.1235	2244	1607	2121	2522	2594	2448	2579	1626	2013	2046	2170	2080	2218	2336	2301	2293	2182.2	2077	2287	1.101	0.139	3.335	0.000853849	0.00218112	0.000325078	0.00264477	0.00119905	0.00119905	TRUE	0.0108319	No
orf19.1236	2097	1636	1837	2391	2785	2663	2654	1989	1881	2083	1879	1972	2382	2541	2368	2805	2238.93	1954	2524	1.291	0.368	5.878	4.165e-09	2.44847e-08	0.00384765	0.00262791	0.00331052	0.00331052	TRUE	0.0656242	No
orf19.1237	900	702	835	1036	823	778	772	528	807	894	854	854	704	742	689	745	786.18	852	720	0.844	-0.244	-4.169	3.05594e-05	0.0001028	1e-08	0.00382604	0.0020098	0.0020098	TRUE	0.0151582	No
orf19.1238	191	142	174	207	235	230	226	144	171	181	178	171	201	219	202	203	190.76	175	206	1.18	0.239	2.391	0.0168228	0.031914	1e-08	0.00958978	0.00434905	0.00434905	TRUE	0.0210456	No
orf19.1239	5	7	9	8	10	3	6	4	4	9	9	7	9	3	5	6	6.45	7	6	0.785	-0.349	-0.631	0.528056	NA	1e-08	0.226995	0.137019	0.137019	TRUE	0.357422	No
orf19.124	8651	6873	7727	9934	8265	8415	8613	5433	7761	8750	7905	8192	7068	8029	7686	7663	7881.79	8152	7612	0.934	-0.099	-1.891	0.0586384	0.0965469	0.00264159	0.00216371	0.00249158	0.00249158	TRUE	0.0293988	No
orf19.1240	6807	4844	6356	7499	9978	9008	9729	6093	6107	6167	6503	6184	8533	8595	8682	8594	7420.49	6240	8601	1.378	0.463	14.733	3.9317e-49	3.88576e-47	0.000248938	0.00217516	0.000809641	0.000809641	TRUE	0.00978545	No
orf19.1244	2196	1537	1918	2294	2597	2492	2626	1542	1970	1957	1962	1892	2221	2378	2343	2175	2112.21	1945	2279	1.173	0.231	5.22	1.7869e-07	8.45331e-07	0.000615389	0.00266681	0.0013984	0.0013984	TRUE	0.0103799	No
orf19.1246	4012	2799	3726	4375	4766	4092	4683	3028	3599	3563	3812	3608	4076	3904	4179	4271	3876.55	3646	4108	1.126	0.171	4.093	4.25422e-05	0.000139212	0.000862499	0.00235401	0.00141787	0.00141787	TRUE	0.0133943	No
orf19.1247	319	226	249	341	266	232	249	144	286	288	255	281	227	221	222	203	248	278	218	0.791	-0.338	-3.698	0.000217597	0.000630035	1e-08	0.00783318	0.00394911	0.00394911	TRUE	0.0331316	No
orf19.1248	3944	2389	3254	4139	4050	3417	3707	2565	3538	3041	3329	3413	3464	3260	3308	3618	3371.44	3330	3412	1.023	0.033	0.594	0.552471	0.633443	0.00253571	0.00241011	0.00263702	0.00263702	TRUE	0.0403331	No
orf19.1249	770	569	756	949	738	587	640	414	691	724	773	783	631	560	571	584	664.68	743	586	0.79	-0.34	-4.979	6.37575e-07	2.77375e-06	0.00191723	0.00416358	0.00296101	0.00296101	TRUE	0.0334878	No
orf19.125	8389	6482	7780	9550	9690	9205	9602	5680	7526	8252	7960	7875	8287	8783	8568	8011	8157.81	7903	8412	1.065	0.091	2.13	0.0331743	0.0585865	0.00134917	0.00215748	0.00163153	0.00163153	TRUE	0.0126332	No
orf19.1250	4644	2965	3924	4811	3919	3250	3574	1957	4166	3775	4015	3967	3352	3101	3189	2760	3540.6	3981	3100	0.78	-0.359	-5.986	2.14666e-09	1.30011e-08	0.00367739	0.00238954	0.00316581	0.00316581	TRUE	0.0638449	No
orf19.1251	1801	1304	1657	2018	1912	1739	1863	1230	1616	1660	1695	1664	1635	1659	1662	1735	1665.86	1659	1673	1.007	0.01	0.245	0.806234	0.849799	1e-08	0.00285097	0.00110846	0.00110846	TRUE	0.00657454	No
orf19.1252	17171	11829	15327	18719	20845	17709	19667	12803	15404	15060	15681	15436	17827	16897	17550	18057	16489	15395	17583	1.142	0.191	6.041	1.53415e-09	9.50225e-09	0.000464237	0.00206756	0.000902176	0.000902176	TRUE	0.00842661	No
orf19.1253	1512	966	1328	1553	2165	1835	2106	1387	1356	1230	1359	1281	1852	1751	1879	1956	1582.94	1306	1860	1.42	0.506	9.55	1.30268e-21	2.63518e-20	0.0013214	0.00289662	0.00204548	0.00204548	TRUE	0.0184314	No
orf19.1254	771	502	664	788	1002	837	839	532	692	639	679	650	857	799	749	750	726.81	665	789	1.187	0.248	3.803	0.000143031	0.000425411	0.00159686	0.00397688	0.00269398	0.00269398	TRUE	0.0420059	No
orf19.1255	47	39	58	64	61	42	58	43	42	50	59	53	52	40	52	61	51.07	51	51	0.996	-0.006	-0.028	0.977494	0.983783	1e-08	0.030404	0.0198739	0.0198739	TRUE	0.17392	No
orf19.1257	12	14	13	11	12	9	10	9	11	18	13	9	10	9	9	13	11.43	13	10	0.8	-0.322	-0.784	0.432798	NA	1e-08	0.129005	0.0719738	0.0719738	TRUE	0.231478	No
orf19.1258	99	69	76	99	92	91	70	52	89	88	78	82	79	87	62	73	79.67	84	75	0.898	-0.155	-0.971	0.331404	0.418118	1e-08	0.0202008	0.0119648	0.0119648	TRUE	0.139262	No
orf19.1259	3690	2476	3229	3913	3926	3647	3837	2424	3310	3152	3304	3227	3358	3480	3424	3419	3334.13	3248	3420	1.052	0.073	2.118	0.0341331	0.0601402	1e-08	0.00241493	0.000853519	0.000853519	TRUE	0.00442917	No
orf19.1260	712	469	518	716	681	614	598	379	639	597	530	590	582	586	534	535	574.08	589	559	0.95	-0.074	-0.996	0.319313	0.406104	0.00262734	0.00450826	0.00354179	0.00354179	TRUE	0.0534205	No
orf19.1261	2954	1982	2482	3131	3116	2822	3221	1903	2650	2523	2539	2582	2665	2693	2874	2684	2651.29	2574	2729	1.06	0.084	2.049	0.0404949	0.0697915	0.000550163	0.00252707	0.00125141	0.00125141	TRUE	0.0160914	No
orf19.1263	2438	1693	2127	2552	2360	2188	2438	1560	2187	2155	2176	2104	2018	2088	2176	2200	2138.11	2156	2120	0.983	-0.025	-0.59	0.554939	0.635409	0.000480564	0.00265849	0.00130371	0.00130371	TRUE	0.0130412	No
orf19.1264	617	447	608	734	619	561	575	404	554	569	622	605	529	535	513	570	562.18	588	537	0.911	-0.135	-1.997	0.0458135	0.0779065	0.000577794	0.00456177	0.0026083	0.0026083	TRUE	0.0194563	No
orf19.1265	327	260	308	393	351	354	319	208	293	331	315	324	300	338	285	293	309.94	316	304	0.965	-0.052	-0.591	0.554756	0.635409	0.00121863	0.00666332	0.00416237	0.00416237	TRUE	0.0650353	No
orf19.1266	1779	1372	1500	1745	1542	1499	1509	802	1596	1747	1535	1439	1319	1430	1347	1131	1442.87	1579	1307	0.83	-0.269	-3.415	0.000636779	0.00167137	0.00707773	0.00298564	0.00523886	0.00523886	TRUE	0.0924839	No
orf19.1267	8289	5846	7233	8883	7180	6286	7137	4305	7436	7443	7400	7325	6141	5998	6369	6072	6772.83	7401	6145	0.831	-0.268	-8.628	6.21858e-18	9.60443e-17	0.000167902	0.00219386	0.000774757	0.000774757	TRUE	0.00748923	No
orf19.1267.1	1228	958	1017	1414	1501	1396	1383	871	1102	1220	1040	1166	1284	1332	1234	1228	1200.76	1132	1270	1.124	0.168	2.82	0.00479859	0.0104004	0.00197314	0.00318851	0.0025705	0.0025705	TRUE	0.0343004	No
orf19.1268	193	135	188	202	190	156	158	138	173	172	192	167	162	149	141	195	168.86	176	162	0.911	-0.134	-1.112	0.266159	0.350291	0.00484148	0.0105765	0.00808639	0.00808639	TRUE	0.16286	No
orf19.1270	1294	887	1095	1346	1179	1091	1183	738	1161	1129	1120	1110	1008	1041	1056	1041	1083.27	1130	1036	0.917	-0.125	-2.619	0.00882775	0.0180337	1e-08	0.00331963	0.00127329	0.00127329	TRUE	0.00438725	No
orf19.1272	1272	891	1075	1265	1009	930	922	621	1141	1134	1100	1043	863	887	823	876	983.42	1104	862	0.781	-0.357	-6.523	6.89305e-11	5.12543e-10	1e-08	0.00345571	0.00184218	0.00184218	TRUE	0.0179357	No
orf19.1273	152	87	110	117	178	125	122	82	136	111	113	96	152	119	109	116	119.02	114	124	1.092	0.127	0.815	0.415283	0.503434	0.0154034	0.0141766	0.0147567	0.0147567	TRUE	0.259282	No
orf19.1274	11	5	21	15	12	8	15	13	10	6	21	12	10	8	13	18	12.46	12	12	0.961	-0.057	-0.128	0.89784	NA	0.0979566	0.11846	0.110086	0.110086	TRUE	0.736888	No
orf19.1275	423	272	309	395	282	239	258	185	379	346	316	326	241	228	230	261	291	342	240	0.699	-0.516	-5.568	2.58143e-08	1.35927e-07	0.00221486	0.00696821	0.0047059	0.0047059	TRUE	0.0669098	No
orf19.1276	145	152	150	197	201	223	225	136	130	194	153	162	172	213	201	192	177.1	160	194	1.223	0.29	2.235	0.0254089	0.0463017	0.0108655	0.0101767	0.0104554	0.0104554	TRUE	0.187261	No
orf19.1277	13657	8998	12234	14727	15782	13278	14984	10449	12252	11455	12517	12144	13497	12669	13371	14737	12830.3	12092	13568	1.122	0.166	3.256	0.00112885	0.00281184	0.00260388	0.00209267	0.00240635	0.00240635	TRUE	0.040645	No
orf19.1279	5748	4341	5411	6588	4956	4818	5094	3458	5157	5527	5536	5433	4239	4597	4546	4877	4988.76	5413	4565	0.843	-0.247	-5.078	3.82015e-07	1.72438e-06	0.00190998	0.00227052	0.00206729	0.00206729	TRUE	0.028318	No
orf19.1280	19072	15658	16576	21237	17903	17965	17399	9922	17110	19934	16959	17512	15311	17142	15526	13994	16686	17879	15493	0.867	-0.206	-2.993	0.00275949	0.00631822	0.00641332	0.00206652	0.00449982	0.00449982	TRUE	0.0730689	No
orf19.1281	4475	2964	3671	4716	4474	3926	4186	2621	4015	3773	3756	3889	3826	3746	3735	3697	3804.63	3858	3751	0.972	-0.041	-1.128	0.259381	0.342799	0.000336509	0.00236108	0.000998197	0.000998197	TRUE	0.0091046	No
orf19.1282	1203	849	965	1196	1174	1140	1195	669	1079	1081	987	986	1004	1088	1066	944	1029.41	1033	1026	0.995	-0.007	-0.107	0.914977	0.937465	0.0022462	0.00338974	0.0027681	0.0027681	TRUE	0.0307202	No
orf19.1283	597	465	542	673	669	661	667	467	536	592	555	555	572	631	595	659	586.72	560	614	1.096	0.133	1.954	0.0506991	0.085179	0.000959666	0.00445379	0.00272127	0.00272127	TRUE	0.0251364	No
orf19.1285	4827	3296	4378	5298	5777	5533	5973	3978	4330	4196	4479	4369	4941	5279	5330	5611	4816.88	4344	5290	1.217	0.283	6.225	4.82882e-10	3.23069e-09	0.00143102	0.0022809	0.00177281	0.00177281	TRUE	0.0242614	No
orf19.1286	112	89	101	128	144	88	116	67	100	113	103	106	123	84	104	94	103.47	106	101	0.967	-0.049	-0.329	0.741855	0.798042	0.00598807	0.0160091	0.0116653	0.0116653	TRUE	0.226364	No
orf19.1287	7496	5528	6512	8215	10769	10359	10676	6717	6725	7038	6662	6774	9210	9884	9527	9474	8161.69	6800	9524	1.401	0.486	13.884	7.92204e-44	6.102e-42	0.000551054	0.00215739	0.00105229	0.00105229	TRUE	0.00803906	No
orf19.1288	7506	4995	6733	7882	6296	5354	5631	3891	6734	6359	6889	6500	5385	5109	5025	5488	5935.84	6620	5252	0.793	-0.335	-7.753	8.98916e-15	1.01136e-13	0.00128841	0.00222409	0.00162289	0.00162289	TRUE	0.0107345	No
orf19.1289	1565	1154	1459	1636	2030	1898	2044	1165	1404	1469	1493	1349	1736	1811	1824	1643	1591.14	1429	1754	1.231	0.3	5.64	1.69842e-08	9.14349e-08	0.00131385	0.00289189	0.00207202	0.00207202	TRUE	0.0197899	No
orf19.1290	2935	2155	2660	3363	4791	4396	4762	2926	2633	2744	2721	2773	4097	4195	4249	4127	3442.41	2718	4167	1.534	0.617	17.627	1.53784e-69	3.55359e-67	1e-08	0.00240123	0.000872264	0.000872264	TRUE	0.00558783	No
orf19.1291	1720	1207	1491	1891	2356	2071	2223	1355	1543	1537	1525	1559	2015	1976	1984	1911	1756.28	1541	1972	1.28	0.357	8.86	7.97015e-19	1.31551e-17	1e-08	0.0028061	0.000978543	0.000978543	TRUE	0.004516	No
orf19.1295	5233	4105	4871	5816	5607	5834	5999	3443	4695	5226	4984	4796	4795	5567	5353	4856	5033.9	4925	5143	1.045	0.063	1.087	0.276955	0.361021	0.00355071	0.00226791	0.00307074	0.00307074	TRUE	0.037523	No
orf19.1296	1155	890	1001	1241	1436	1533	1586	901	1036	1133	1024	1023	1228	1463	1415	1271	1199.19	1054	1344	1.278	0.354	5.177	2.25557e-07	1.05132e-06	0.00363362	0.00319009	0.00363197	0.00363197	TRUE	0.0434804	No
orf19.1297	592	472	579	705	924	949	985	612	531	601	592	581	790	906	879	863	717.95	576	860	1.493	0.578	8.545	1.28002e-17	1.90827e-16	0.00202382	0.00400154	0.00293857	0.00293857	TRUE	0.037482	No
orf19.1298	2302	2043	2205	2871	3162	3341	3549	1888	2065	2601	2256	2367	2704	3188	3167	2663	2626.42	2322	2930	1.263	0.337	4.122	3.75745e-05	0.000124105	0.00888172	0.00253225	0.00604056	0.00604056	TRUE	0.0775053	No
orf19.1299	1771	1642	1693	2277	1890	2400	2371	1527	1589	2090	1732	1878	1616	2290	2116	2154	1933.1	1822	2044	1.122	0.166	1.559	0.118954	0.176944	0.0166104	0.00273049	0.0103385	0.0103385	TRUE	0.242821	No
orf19.130	426	361	408	500	406	444	465	277	382	460	417	412	347	424	415	391	406	418	394	0.946	-0.081	-0.915	0.360077	0.448361	0.00446554	0.00555516	0.00501334	0.00501334	TRUE	0.0812019	No
orf19.1300	2125	1668	1914	2400	2655	2469	2605	1538	1906	2124	1958	1979	2271	2356	2325	2169	2135.92	1992	2280	1.147	0.198	4.149	3.33413e-05	0.000111286	0.0011073	0.00265918	0.00172283	0.00172283	TRUE	0.0225608	No
orf19.1301	574	438	400	574	433	482	448	319	515	558	409	473	370	460	400	450	454.38	489	420	0.858	-0.22	-2.103	0.0354366	0.0621979	0.0113934	0.00517443	0.00829431	0.00829431	TRUE	0.136371	No
orf19.1302	36	28	34	53	44	34	27	23	32	36	35	44	38	32	24	32	34.13	37	32	0.861	-0.217	-0.893	0.371664	0.460214	1e-08	0.0445145	0.0271211	0.0271211	TRUE	0.205539	No
orf19.1303	1970	1436	1696	2178	1904	1746	1887	1149	1767	1828	1735	1796	1628	1666	1684	1621	1715.67	1782	1650	0.927	-0.109	-2.654	0.00795607	0.0164185	1e-08	0.00282566	0.00104819	0.00104819	TRUE	0.00354369	No
orf19.1304	5031	3747	4345	5345	5115	4919	5232	2790	4513	4770	4445	4408	4375	4694	4669	3935	4476.05	4534	4418	0.976	-0.036	-0.609	0.542668	0.624947	0.00320295	0.00230385	0.00308413	0.00308413	TRUE	0.0639833	No
orf19.1305	1159	1074	1065	1362	1202	1419	1458	887	1040	1367	1090	1123	1028	1354	1301	1251	1194.22	1155	1234	1.069	0.096	0.967	0.333517	0.420254	0.0129333	0.00319512	0.00869725	0.00869725	TRUE	0.178838	No
orf19.1306	2872	2084	2554	2996	2372	2332	2436	1514	2576	2653	2613	2471	2029	2225	2174	2135	2359.5	2578	2141	0.831	-0.267	-5.958	2.54683e-09	1.52404e-08	0.000862932	0.00259478	0.00150498	0.00150498	TRUE	0.0159864	No
orf19.1307	838	603	743	963	764	711	698	501	752	768	760	794	653	678	623	707	716.87	768	665	0.863	-0.213	-3.539	0.00040179	0.0011063	1e-08	0.00400456	0.00207952	0.00207952	TRUE	0.0216148	No
orf19.1308	3350	2322	3049	3653	4137	3649	3881	2514	3005	2956	3119	3012	3538	3482	3463	3546	3265.25	3023	3507	1.159	0.213	6.223	4.88061e-10	3.2617e-09	1e-08	0.00242411	0.000820426	0.000820426	TRUE	0.00540752	No
orf19.1309	573	345	447	552	747	542	604	380	514	439	457	455	639	517	539	536	512.09	466	558	1.196	0.258	2.996	0.0027337	0.00626872	0.00548619	0.00481438	0.00516777	0.00516777	TRUE	0.117933	No
orf19.131	426	318	336	497	368	331	334	206	382	405	344	410	315	316	298	291	344.97	385	305	0.793	-0.334	-3.963	7.39942e-05	0.000231059	1e-08	0.00618774	0.00390429	0.00390429	TRUE	0.0591024	No
orf19.1310	768	559	675	900	745	673	819	493	689	712	691	742	637	642	731	695	692.36	708	676	0.953	-0.069	-1.042	0.297512	0.382752	0.00158789	0.00407628	0.00274813	0.00274813	TRUE	0.0385525	No
orf19.1311	18	7	10	11	14	13	12	1	16	9	10	9	12	12	11	1	10.11	11	9	0.852	-0.23	-0.478	0.632945	NA	0.0828821	0.145611	0.12629	0.12629	TRUE	0.655522	No
orf19.131.2	2780	2048	2292	3156	3045	2581	2569	1887	2494	2607	2345	2602	2604	2463	2292	2661	2508.68	2512	2505	0.996	-0.005	-0.089	0.928793	0.949011	0.00299852	0.00255819	0.00282196	0.00282196	TRUE	0.0400355	No
orf19.1313	479	328	412	548	602	517	550	394	430	418	422	452	515	493	491	556	471.92	430	514	1.187	0.248	3.491	0.000480909	0.0013056	1e-08	0.0050557	0.00270105	0.00270105	TRUE	0.029887	No
orf19.1314	3720	3216	3439	4261	4584	4462	4678	2902	3337	4094	3518	3514	3920	4257	4174	4093	3863.61	3616	4111	1.138	0.186	2.987	0.00282108	0.00644205	0.00442786	0.00235526	0.00348237	0.00348237	TRUE	0.0947056	No
orf19.1317	1280	919	1166	1418	1246	1141	1211	802	1148	1170	1193	1169	1066	1089	1081	1131	1130.83	1170	1092	0.931	-0.103	-2.18	0.0292492	0.0523939	1e-08	0.00326328	0.00124316	0.00124316	TRUE	0.00612345	No
orf19.1318	1319	999	1200	1502	1137	1183	1195	668	1183	1272	1228	1239	972	1129	1066	942	1128.88	1230	1027	0.837	-0.256	-4.028	5.63193e-05	0.000180655	0.0027381	0.00326548	0.00299291	0.00299291	TRUE	0.0519015	No
orf19.132	2539	1911	2277	2858	3268	3043	3222	2075	2278	2433	2330	2357	2795	2904	2875	2927	2612.14	2350	2875	1.224	0.292	7.596	3.04656e-14	3.23387e-13	0.000149262	0.00253527	0.00102726	0.00102726	TRUE	0.00642032	No
orf19.1321	6396	4113	5898	6766	13694	11416	13298	8965	5738	5236	6034	5579	11712	10893	11866	12644	8712.83	5647	11779	2.085	1.06	18.74	2.35571e-78	6.15354e-76	0.00341546	0.00214614	0.00294183	0.00294183	TRUE	0.0312921	No
orf19.1323	1946	1352	1743	2013	1728	1630	1735	1078	1746	1721	1783	1660	1478	1555	1548	1520	1626.5	1728	1525	0.883	-0.179	-4.027	5.6493e-05	0.000181115	1e-08	0.00287206	0.00127743	0.00127743	TRUE	0.00901763	No
orf19.1324	1504	993	1250	1545	1809	1568	1755	1084	1349	1264	1279	1274	1547	1496	1566	1529	1413.06	1292	1534	1.188	0.248	5.478	4.30365e-08	2.20241e-07	1e-08	0.00300686	0.00125642	0.00125642	TRUE	0.0112022	No
orf19.1325	507	310	425	496	369	307	353	204	455	395	435	409	316	293	315	288	363.07	424	303	0.716	-0.481	-5.952	2.65578e-09	1.5845e-08	1e-08	0.00597795	0.00345571	0.00345571	TRUE	0.029663	No
orf19.1326	321	244	310	333	267	212	204	136	288	311	317	275	228	202	182	192	249.36	298	201	0.68	-0.557	-5.492	3.96978e-08	2.04199e-07	0.00322771	0.00780133	0.00570335	0.00570335	TRUE	0.0989244	No
orf19.1327	127	97	159	164	159	138	150	109	114	123	163	135	136	132	134	154	136.32	134	139	1.032	0.046	0.338	0.735633	0.79348	0.00679771	0.0126286	0.0101111	0.0101111	TRUE	0.211998	No
orf19.133	0	1	0	2	0	0	0	0	0	1	0	2	0	0	0	0	0.37	1	0	0.254	-1.977	-0.763	0.445455	NA	1e-08	3.97607	4.764	4.764	TRUE	0.093742	No
orf19.1330	169	110	147	179	204	164	209	120	152	140	150	148	174	156	186	169	159.54	148	171	1.164	0.219	1.971	0.048772	0.0824254	1e-08	0.0110786	0.00562821	0.00562821	TRUE	0.041307	No
orf19.1331	3629	3243	3347	4476	5106	5566	5505	3189	3256	4129	3424	3691	4367	5311	4912	4498	4198.42	3625	4772	1.317	0.398	4.922	8.56307e-07	3.64613e-06	0.00921283	0.0023253	0.00602307	0.00602307	TRUE	0.105138	No
orf19.1332	975	690	867	1074	966	826	936	623	875	878	887	886	826	788	835	879	856.75	882	832	0.942	-0.087	-1.608	0.107744	0.162444	1e-08	0.00367395	0.00162825	0.00162825	TRUE	0.0143081	No
orf19.1333	1269	983	1188	1438	987	898	1009	651	1138	1251	1215	1186	844	857	900	918	1038.83	1198	880	0.734	-0.446	-8.196	2.48038e-16	3.22557e-15	0.000578602	0.00337696	0.00184961	0.00184961	TRUE	0.013334	No
orf19.1334	731	547	648	880	783	731	882	484	656	696	663	726	670	697	787	683	697.2	685	709	1.036	0.051	0.727	0.466921	0.552761	0.00267281	0.0040617	0.00330955	0.00330955	TRUE	0.0672993	No
orf19.1335	7933	5954	7556	8944	7704	7521	8033	4862	7117	7580	7731	7375	6589	7176	7168	6857	7199.15	7451	6948	0.933	-0.1	-2.343	0.019113	0.0357061	0.00127317	0.00218117	0.00162452	0.00162452	TRUE	0.0151566	No
orf19.1336	4726	3438	3871	5059	4453	3706	3812	2386	4240	4377	3960	4172	3808	3536	3402	3365	3857.51	4187	3528	0.843	-0.246	-4.813	1.48735e-06	6.12056e-06	0.00213364	0.00235585	0.00224174	0.00224174	TRUE	0.0353274	No
orf19.1336.2	1150	859	953	1181	1645	1464	1435	728	1032	1094	975	974	1407	1397	1280	1027	1148.15	1019	1278	1.258	0.332	3.631	0.000281939	0.00080078	0.00996293	0.00324391	0.00712449	0.00712449	TRUE	0.199955	No
orf19.1338	1147	755	919	1143	1371	1212	1338	748	1029	961	940	943	1173	1156	1194	1055	1056.35	968	1144	1.185	0.245	4.244	2.19487e-05	7.56989e-05	0.0013002	0.00335378	0.00223576	0.00223576	TRUE	0.0295682	No
orf19.1339	13872	9386	11922	15282	10661	9007	9824	6833	12445	11949	12197	12602	9118	8594	8766	9637	10663.6	12298	9029	0.734	-0.447	-10.506	8.08167e-26	2.22728e-24	0.00144267	0.00211566	0.00164009	0.00164009	TRUE	0.0245276	No
orf19.134	0	0	2	2	0	1	0	0	0	0	2	2	0	1	0	0	0.58	1	0	0.324	-1.627	-0.813	0.416055	NA	1e-08	2.49975	2.31731	2.31731	TRUE	0.194958	No
orf19.1340	213	132	152	218	142	118	153	76	191	168	156	180	121	113	137	107	146.52	174	120	0.69	-0.534	-4.282	1.84976e-05	6.45749e-05	0.00242684	0.0118874	0.00792569	0.00792569	TRUE	0.0953593	No
orf19.1341	557	379	495	598	445	391	401	252	500	483	506	493	381	373	358	355	431.08	496	367	0.741	-0.432	-6.221	4.94289e-10	3.28869e-09	1e-08	0.0053471	0.002271	0.002271	TRUE	0.00774829	No
orf19.1342	6401	4156	5408	6413	6082	5453	5850	3576	5742	5291	5533	5288	5202	5203	5220	5044	5315.37	5464	5167	0.946	-0.08	-2.092	0.0364642	0.0637779	0.000675832	0.00225264	0.00122533	0.00122533	TRUE	0.0145803	No
orf19.1343	556	445	488	628	809	813	822	473	499	567	499	518	692	776	733	667	618.84	521	717	1.384	0.468	6.572	4.96281e-11	3.78383e-10	0.00211628	0.00432538	0.00321708	0.00321708	TRUE	0.0367843	No
orf19.1344	2221	2420	2258	3213	1589	1830	1816	1063	1992	3081	2310	2649	1359	1746	1620	1499	2032.23	2508	1556	0.621	-0.688	-4.467	7.94502e-06	2.94108e-05	0.0222763	0.00269386	0.012526	0.0222763	TRUE	0.192258	No
orf19.1345	88	54	84	88	47	28	38	15	79	69	86	73	40	27	34	21	53.52	77	30	0.407	-1.296	-6.115	9.66614e-10	6.17154e-09	0.00216362	0.0291029	0.0206272	0.0206272	TRUE	0.318968	No
orf19.1348	1	4	3	0	1	0	3	3	1	5	3	0	1	0	3	4	2.1	2	2	0.858	-0.221	-0.191	0.848808	NA	0.947576	0.69235	0.78359	0.78359	TRUE	0.299412	No
orf19.1349	119	79	131	135	95	60	88	62	107	101	134	111	81	57	79	87	94.64	113	76	0.668	-0.582	-3.563	0.000366745	0.00101915	0.0106966	0.0173182	0.0146451	0.0146451	TRUE	0.261277	No
orf19.135	1103	873	986	1224	1168	1183	1288	664	990	1111	1009	1009	999	1129	1149	937	1041.57	1030	1054	1.027	0.038	0.513	0.608106	0.683153	0.00498955	0.00337329	0.00424309	0.00424309	TRUE	0.0612301	No
orf19.1350	7062	5636	6496	8210	7818	7918	8155	5370	6335	7175	6646	6770	6686	7555	7277	7574	7002.36	6732	7273	1.08	0.112	2.086	0.0369395	0.0644404	0.00276398	0.00218684	0.00260175	0.00260175	TRUE	0.0363064	No
orf19.1351	447	285	347	444	430	395	453	262	401	363	355	366	368	377	404	370	375.42	371	380	1.022	0.032	0.41	0.681995	0.745936	1e-08	0.00584636	0.00316597	0.00316597	TRUE	0.0349135	No
orf19.1352	3741	2471	3272	4017	4902	4264	4794	2897	3356	3146	3348	3312	4192	4069	4278	4086	3723.34	3290	4156	1.263	0.336	8.986	2.56664e-19	4.43114e-18	0.000359919	0.00236942	0.00107325	0.00107325	TRUE	0.00998501	No
orf19.1353	223	121	207	232	244	173	205	176	200	154	212	191	209	165	183	248	195.26	189	201	1.052	0.073	0.526	0.599011	0.675335	0.0174999	0.00941414	0.0133748	0.0133748	TRUE	0.234449	No
orf19.1354	113545	91264	100971	129452	147029	144734	147807	82571	101862	116189	103303	106748	125744	138101	131893	116459	117537	107026	128049	1.196	0.259	4.314	1.60643e-05	5.67399e-05	0.00439763	0.00199187	0.00345033	0.00345033	TRUE	0.0454581	No
orf19.1355	3020	2301	2641	3511	3259	3300	3399	2180	2709	2929	2702	2895	2787	3149	3033	3075	2909.95	2809	3011	1.072	0.1	1.948	0.0514606	0.0861933	0.00180973	0.0024784	0.0021761	0.0021761	TRUE	0.0311876	No
orf19.1356	533	372	444	630	552	572	613	388	478	474	454	520	472	546	547	547	504.7	482	528	1.093	0.128	1.663	0.0963906	0.148073	0.00263542	0.00485587	0.00370643	0.00370643	TRUE	0.0634925	No
orf19.1357	24163	16889	21966	26528	25327	23935	26421	15406	21677	21501	22473	21875	21660	22838	23576	21729	22166.3	21882	22451	1.026	0.037	0.996	0.319296	0.406104	0.000974058	0.00204501	0.00129333	0.00129333	TRUE	0.0139823	No
orf19.1358	13615	9592	12105	14950	19307	16929	18143	12938	12214	12212	12385	12328	16512	16153	16190	18248	14530.1	12285	16776	1.365	0.449	10.207	1.84556e-24	4.52577e-23	0.00168823	0.00207943	0.00178794	0.00178794	TRUE	0.0421987	No
orf19.1359	1261	1065	1227	1459	1236	1324	1410	945	1131	1356	1255	1203	1057	1263	1258	1333	1232.12	1236	1228	0.993	-0.011	-0.132	0.894738	0.920477	0.00698231	0.00315774	0.00524372	0.00524372	TRUE	0.107445	No
orf19.136	3311	2373	3138	3859	3774	3525	3872	2522	2970	3021	3210	3182	3228	3363	3455	3557	3248.41	3096	3401	1.097	0.134	2.934	0.00334793	0.00751095	0.00116448	0.00242642	0.00168726	0.00168726	TRUE	0.0144291	No
orf19.1360	545	423	484	637	533	489	543	334	489	539	495	525	456	467	485	471	490.74	512	470	0.918	-0.123	-1.824	0.0681909	0.11028	1e-08	0.00493769	0.00235688	0.00235688	TRUE	0.0122077	No
orf19.1360.1	209	168	204	290	274	204	196	176	187	214	209	239	234	195	175	248	212.67	212	213	0.997	-0.004	-0.029	0.977142	0.983783	0.0134092	0.00880568	0.0110056	0.0110056	TRUE	0.163276	No
orf19.1361	3839	2845	3457	4272	4349	4166	4281	2433	3444	3622	3537	3523	3719	3975	3820	3432	3633.96	3532	3736	1.06	0.083	1.72	0.0854321	0.133875	0.00172257	0.00237901	0.00198476	0.00198476	TRUE	0.0348926	No
orf19.1362	6860	5195	6223	7657	7737	7457	7946	4596	6154	6614	6367	6314	6617	7115	7090	6482	6594.2	6362	6826	1.074	0.103	2.355	0.0185224	0.0347084	0.00137447	0.00219967	0.00167264	0.00167264	TRUE	0.0135632	No
orf19.1363	29370	23082	26071	33827	34139	32582	33618	22204	26348	29386	26673	27894	29197	31089	29998	31317	28987.7	27575	30400	1.102	0.141	3.201	0.00136824	0.00334705	0.00173051	0.0020296	0.00182172	0.00182172	TRUE	0.0237887	No
orf19.1364	2591	1781	2333	2799	2693	2579	2780	1850	2324	2267	2387	2308	2303	2461	2481	2609	2392.58	2322	2464	1.059	0.083	1.785	0.0743193	0.118595	0.000968777	0.00258627	0.001653	0.001653	TRUE	0.0235554	No
orf19.1365	1284	860	1198	1356	1250	1059	1103	704	1152	1095	1226	1118	1069	1010	984	993	1080.91	1148	1014	0.884	-0.178	-3.192	0.00141106	0.003442	0.00102491	0.00332256	0.00203935	0.00203935	TRUE	0.0244525	No
orf19.1366	93	58	82	96	94	64	81	50	83	74	84	79	80	61	72	71	75.57	80	71	0.887	-0.172	-1.08	0.280275	0.3644	1e-08	0.0211887	0.0112799	0.0112799	TRUE	0.089058	No
orf19.1367	100	69	104	120	162	186	177	96	90	88	106	99	139	177	158	135	124.03	96	152	1.594	0.673	4.877	1.07916e-06	4.5308e-06	0.00486633	0.0136835	0.00981329	0.00981329	TRUE	0.128808	No
orf19.1367.1	1166	880	1023	1329	1521	1200	1250	639	1046	1120	1047	1096	1301	1145	1115	901	1096.42	1077	1116	1.039	0.055	0.602	0.54709	0.628473	0.0106207	0.00330356	0.00710015	0.00710015	TRUE	0.189878	No
orf19.1368	1707	1160	1483	1883	2545	2250	2518	1694	1531	1477	1517	1553	2177	2147	2247	2389	1879.72	1520	2240	1.47	0.556	11.792	4.28057e-32	1.7495e-30	0.000804451	0.00275182	0.00158156	0.00158156	TRUE	0.0224231	No
orf19.1369	503	372	440	568	457	422	505	245	451	474	450	468	391	403	451	346	429.13	461	398	0.868	-0.205	-2.47	0.0135037	0.0262813	0.00311115	0.0053624	0.00427221	0.00427221	TRUE	0.0924613	No
orf19.137	3441	3169	3358	4489	3162	3713	3615	2285	3087	4034	3436	3702	2704	3543	3226	3223	3369.29	3565	3174	0.891	-0.167	-1.836	0.0663521	0.107858	0.0119417	0.00241039	0.0076726	0.0076726	TRUE	0.121923	No
orf19.1370	11	11	8	10	5	14	5	4	10	14	8	8	4	13	4	6	8.51	10	7	0.698	-0.518	-1.007	0.313863	NA	0.0711694	0.172665	0.131782	0.131782	TRUE	1.1205	No
orf19.1371	409	306	325	446	571	538	541	344	367	390	333	368	488	513	483	485	428.3	364	492	1.355	0.438	5.956	2.58093e-09	1.54291e-08	1e-08	0.00536899	0.00280577	0.00280577	TRUE	0.0370759	No
orf19.1372	391	225	321	410	431	442	420	281	351	286	328	338	369	422	375	396	358.15	326	390	1.191	0.252	2.914	0.0035706	0.00795408	0.00239756	0.00603289	0.00435406	0.00435406	TRUE	0.0664132	No
orf19.1373	133	96	119	170	170	141	163	106	119	122	122	140	145	135	145	150	134.79	126	144	1.136	0.184	1.529	0.126267	0.186392	1e-08	0.0127493	0.00651553	0.00651553	TRUE	0.0681704	No
orf19.1374	429	316	343	480	381	377	337	232	385	402	351	396	326	360	301	327	355.92	384	328	0.856	-0.224	-2.648	0.00810568	0.0166976	0.00175625	0.0060582	0.00404784	0.00404784	TRUE	0.0497163	No
orf19.1375	22999	15404	20241	24661	27705	23957	25968	16330	20633	19611	20709	20336	23694	22859	23172	23032	21755.6	20322	23189	1.141	0.19	6.461	1.03732e-10	7.54506e-10	0.000362357	0.00204625	0.000786664	0.000786664	TRUE	0.0066717	No
orf19.1376	3209	2275	2897	3535	2669	2541	2555	1746	2879	2896	2964	2915	2283	2425	2280	2463	2637.96	2914	2363	0.81	-0.305	-7.483	7.25127e-14	7.43441e-13	0.000376676	0.00252983	0.00120654	0.00120654	TRUE	0.00904631	No
orf19.1377	2265	1687	2029	2615	2005	1824	1801	1227	2032	2148	2076	2156	1715	1740	1607	1731	1900.59	2103	1698	0.807	-0.309	-6.843	7.72876e-12	6.38903e-11	0.000583458	0.00274334	0.00142486	0.00142486	TRUE	0.0163298	No
orf19.1378	10516	6761	9167	11198	10508	8709	9980	6277	9434	8607	9379	9234	8987	8310	8905	8853	8963.68	9164	8764	0.956	-0.065	-1.521	0.12826	0.188916	0.00132776	0.00214148	0.00163234	0.00163234	TRUE	0.0200211	No
orf19.138	101	85	113	136	100	83	90	74	91	108	116	112	86	79	80	104	97	107	87	0.812	-0.301	-2.008	0.0446554	0.0762187	0.00272209	0.0169459	0.0111683	0.0111683	TRUE	0.126367	No
orf19.1381	2213	1361	1756	2260	2848	2370	2455	1564	1985	1733	1797	1864	2436	2261	2191	2206	2058.98	1845	2274	1.232	0.301	5.377	7.59307e-08	3.78582e-07	0.0022809	0.00268458	0.00251421	0.00251421	TRUE	0.0318822	No
orf19.1382	585	390	502	629	574	493	494	316	525	497	514	519	491	470	441	446	487.68	514	462	0.9	-0.151	-2.221	0.026364	0.0479548	1e-08	0.0049563	0.00240891	0.00240891	TRUE	0.022029	No
orf19.1383	756	518	666	779	748	722	752	474	678	659	681	642	640	689	671	669	666.2	665	667	1.002	0.003	0.056	0.955038	0.967926	1e-08	0.00415859	0.00184381	0.00184381	TRUE	0.00993188	No
orf19.1386	2805	2005	2484	3016	2390	2177	2332	1439	2516	2553	2541	2487	2044	2077	2081	2030	2291.14	2524	2058	0.816	-0.293	-8.131	4.25999e-16	5.43397e-15	1e-08	0.00261314	0.000807088	0.000807088	TRUE	0.00124125	No
orf19.1387	4788	3261	4183	5088	4628	3768	4093	2744	4295	4152	4280	4196	3958	3595	3652	3870	3999.75	4231	3769	0.89	-0.167	-4.017	5.90241e-05	0.000188626	0.000849391	0.00234247	0.00141553	0.00141553	TRUE	0.0147329	No
orf19.1388	6111	4203	5129	6484	5760	5207	5575	3128	5482	5351	5247	5347	4926	4968	4975	4412	5088.54	5357	4820	0.901	-0.151	-3.323	0.000891528	0.00226386	0.00150472	0.00226481	0.00177993	0.00177993	TRUE	0.0379821	No
orf19.1389	3311	2273	2670	3313	3758	3363	3496	2040	2970	2894	2732	2732	3214	3209	3120	2877	2968.42	2832	3105	1.098	0.135	2.697	0.00700332	0.0146148	0.00173627	0.00246857	0.00206158	0.00206158	TRUE	0.0279966	No
orf19.139	845	679	804	921	1031	970	1069	682	758	864	823	759	882	926	954	962	865.95	801	931	1.164	0.219	3.521	0.000430398	0.00117698	0.00156313	0.00365594	0.00254077	0.00254077	TRUE	0.0312937	No
orf19.1390	600	372	517	647	586	507	539	382	538	474	529	534	501	484	481	539	509.87	519	501	0.96	-0.059	-0.826	0.408588	0.496868	0.000493707	0.00482669	0.00285473	0.00285473	TRUE	0.0352741	No
orf19.1391	131	89	114	150	115	100	86	70	118	113	117	124	98	95	77	99	105.05	118	92	0.779	-0.361	-2.612	0.00901275	0.0183741	1e-08	0.0157988	0.00871668	0.00871668	TRUE	0.135769	No
orf19.1392	542	388	435	559	430	390	441	259	486	494	445	461	368	372	394	365	423.11	472	375	0.797	-0.328	-4.515	6.32823e-06	2.37625e-05	1e-08	0.00541053	0.00267716	0.00267716	TRUE	0.0156034	No
orf19.1393	2665	1764	2398	2816	3387	3010	3417	2147	2391	2246	2453	2322	2897	2872	3049	3028	2657.25	2353	2962	1.257	0.33	7.646	2.07576e-14	2.227e-13	0.000675023	0.00252584	0.00140907	0.00140907	TRUE	0.0105412	No
orf19.1394	1324	933	1155	1365	1485	1325	1348	656	1188	1188	1182	1126	1270	1264	1203	925	1168.15	1171	1166	0.999	-0.002	-0.019	0.984585	0.988204	0.00968579	0.00322225	0.00655343	0.00655343	TRUE	0.218235	No
orf19.1395	314	208	223	336	356	269	296	193	282	265	228	277	304	257	264	272	268.65	263	274	1.043	0.06	0.608	0.543219	0.625342	0.00398075	0.00738323	0.00577793	0.00577793	TRUE	0.0890449	No
orf19.1396	2017	1338	1713	2219	2146	1796	1962	1300	1809	1703	1753	1830	1835	1714	1751	1834	1778.57	1774	1784	1.003	0.005	0.107	0.915151	0.937465	0.000525879	0.00279574	0.00143623	0.00143623	TRUE	0.00831325	No
orf19.1397	777	603	736	955	1110	925	1019	688	697	768	753	788	949	883	909	970	839.6	752	928	1.234	0.303	5.003	5.63541e-07	2.47859e-06	0.00110214	0.00370856	0.00231684	0.00231684	TRUE	0.0296122	No
orf19.1400	1177	989	1109	1353	1463	1455	1542	825	1056	1259	1135	1116	1251	1388	1376	1164	1218.05	1142	1295	1.138	0.187	2.565	0.0103233	0.0207155	0.00512457	0.00317135	0.00426612	0.00426612	TRUE	0.0552888	No
orf19.1401	1054	650	861	971	1009	880	998	713	946	828	881	801	863	840	891	1006	881.68	864	900	1.038	0.054	0.728	0.466344	0.552295	0.00456788	0.00362604	0.00418087	0.00418087	TRUE	0.0687663	No
orf19.1402	5808	3676	4993	6035	5678	4683	5075	3636	5210	4680	5108	4977	4856	4468	4529	5128	4869.55	4994	4745	0.949	-0.075	-1.378	0.168186	0.237867	0.00287889	0.00227764	0.00264689	0.00264689	TRUE	0.0349065	No
orf19.1403	4407	2966	3976	4820	5164	4503	4983	3275	3954	3776	4068	3975	4416	4297	4446	4619	4193.83	3943	4444	1.126	0.171	4.42	9.85127e-06	3.58706e-05	0.000607126	0.00232567	0.00119656	0.00119656	TRUE	0.00937033	No
orf19.1404	5757	3867	5069	6192	7218	5914	6527	4326	5165	4923	5186	5106	6173	5643	5824	6101	5515.19	5095	5935	1.164	0.219	5.433	5.55056e-08	2.81416e-07	0.000892406	0.00224274	0.00138355	0.00138355	TRUE	0.0134699	No
orf19.1405	665	504	653	735	722	655	633	435	597	642	668	606	617	625	565	614	616.65	628	605	0.965	-0.052	-0.784	0.433053	0.520045	0.000989884	0.00433368	0.00261312	0.00261312	TRUE	0.0252424	No
orf19.1406	930	750	787	1054	787	819	804	465	834	955	805	869	673	781	717	656	786.41	866	707	0.819	-0.288	-3.852	0.000116946	0.000353248	0.00423123	0.00382551	0.00407017	0.00407017	TRUE	0.0591712	No
orf19.1409	642	406	615	724	929	791	901	580	576	517	629	597	795	755	804	818	686.29	580	793	1.363	0.446	6.566	5.16559e-11	3.93344e-10	0.00167139	0.0040948	0.00294381	0.00294381	TRUE	0.0552299	No
orf19.1409.1	9157	6481	7399	9650	9708	8118	8666	5476	8215	8251	7570	7958	8303	7746	7733	7723	7937.26	7998	7876	0.985	-0.022	-0.515	0.606701	0.681829	0.00116074	0.00216242	0.00158002	0.00158002	TRUE	0.0164275	No
orf19.1409.2	461	370	447	524	327	302	301	209	414	471	457	432	280	288	269	295	363.15	444	283	0.638	-0.649	-8.124	4.502e-16	5.7184e-15	1e-08	0.00597701	0.00322732	0.00322732	TRUE	0.0237814	No
orf19.1409.3	43	48	30	50	19	14	18	9	39	61	31	41	16	13	16	13	28.75	43	14	0.347	-1.526	-5.045	4.53991e-07	2.02343e-06	1e-08	0.0524797	0.0422115	0.0422115	TRUE	0.396677	No
orf19.1411	1244	848	1100	1319	1185	1100	1151	770	1116	1080	1125	1088	1013	1050	1027	1086	1073.1	1102	1044	0.945	-0.082	-1.671	0.094677	0.14627	1e-08	0.00333233	0.00136135	0.00136135	TRUE	0.00755945	No
orf19.1412	2293	1579	1868	2400	2297	2042	2225	1329	2057	2010	1911	1979	1964	1948	1985	1874	1966.28	1989	1943	0.978	-0.032	-0.758	0.448255	0.534773	0.00022947	0.00271782	0.00121532	0.00121532	TRUE	0.00839909	No
orf19.1413	1056	650	857	1080	1225	1027	1099	702	947	828	877	891	1048	980	981	990	942.58	886	1000	1.127	0.173	2.992	0.00276774	0.0063347	0.00093832	0.00351966	0.0021269	0.0021269	TRUE	0.026126	No
orf19.1414	3439	2004	2813	3480	2293	1824	2049	1220	3085	2551	2878	2870	1961	1740	1828	1721	2329.33	2846	1812	0.637	-0.651	-9.957	2.34303e-23	5.31204e-22	0.00421749	0.00260275	0.00364456	0.00364456	TRUE	0.0574737	No
orf19.1415	19672	13803	17940	22171	16264	14770	15800	10398	17648	17573	18354	18282	13909	14093	14099	14665	16078	17964	14192	0.79	-0.341	-10.889	1.3014e-27	4.20366e-26	0.000444525	0.00206981	0.000876667	0.000876667	TRUE	0.00601071	No
orf19.1416	2053	1451	1727	2193	2652	2190	2213	1487	1842	1847	1767	1808	2268	2090	1975	2097	1961.75	1816	2108	1.161	0.215	4.243	2.20797e-05	7.60201e-05	0.00149056	0.00271953	0.00195835	0.00195835	TRUE	0.0334671	No
orf19.1417	754	511	666	767	1139	988	1012	600	676	651	681	632	974	943	903	846	788.37	660	916	1.393	0.478	7.666	1.77589e-14	1.92591e-13	0.00119199	0.00382092	0.00242783	0.00242783	TRUE	0.0279449	No
orf19.1418	509	416	489	548	684	644	685	425	457	530	500	452	585	614	611	599	543.57	485	602	1.249	0.321	4.567	4.95112e-06	1.88866e-05	0.000908624	0.0046502	0.00286881	0.00286881	TRUE	0.0415696	No
orf19.1420	116	79	91	113	124	109	121	78	104	101	93	93	106	104	108	110	102.37	98	107	1.094	0.13	0.975	0.329502	0.416855	1e-08	0.0161604	0.00738063	0.00738063	TRUE	0.0215983	No
orf19.1421	203	122	144	184	162	120	143	109	182	155	147	152	139	115	128	154	146.36	159	134	0.833	-0.264	-2.056	0.0397736	0.0687258	0.00499809	0.0118983	0.00893248	0.00893248	TRUE	0.106327	No
orf19.1422	7337	5262	6635	7837	8541	7897	8494	5312	6582	6699	6788	6462	7305	7535	7579	7492	7055.38	6633	7478	1.128	0.173	5.6	2.13884e-08	1.13517e-07	0.000240203	0.00218528	0.000776849	0.000776849	TRUE	0.00373968	No
orf19.1424	813	541	694	911	901	819	868	529	729	689	710	751	771	781	775	746	744	720	768	1.066	0.092	1.638	0.101359	0.154441	1e-08	0.00393072	0.00171121	0.00171121	TRUE	0.0104815	No
orf19.1426	5866	3888	5284	6485	6851	6139	6695	4436	5262	4950	5406	5348	5859	5858	5974	6257	5614.19	5242	5987	1.141	0.19	4.665	3.09042e-06	1.21673e-05	0.0010052	0.0022381	0.00141695	0.00141695	TRUE	0.0165175	No
orf19.1427	285	190	260	290	296	269	295	210	256	242	266	239	253	257	263	296	258.99	251	267	1.06	0.084	0.921	0.357253	0.444937	1e-08	0.00758467	0.00416627	0.00416627	TRUE	0.0486713	No
orf19.1428	173	108	154	168	168	156	168	87	155	137	158	139	144	149	150	123	144.24	147	142	0.966	-0.05	-0.422	0.673208	0.739151	1e-08	0.0120439	0.00676276	0.00676276	TRUE	0.0627458	No
orf19.1429	62	65	69	117	85	76	85	46	56	83	71	96	73	73	76	65	73.92	76	72	0.94	-0.089	-0.476	0.633866	0.705104	0.0183192	0.0216175	0.0201211	0.0201211	TRUE	0.246266	No
orf19.1430	77	63	83	97	76	69	93	53	69	80	85	80	65	66	83	75	75.35	78	72	0.919	-0.122	-0.75	0.453012	0.538736	1e-08	0.0212469	0.0123056	0.0123056	TRUE	0.109515	No
orf19.1433	1911	1332	1711	2130	2255	2007	2046	1300	1714	1696	1751	1756	1929	1915	1826	1834	1802.49	1729	1876	1.085	0.118	2.815	0.00487251	0.010534	1e-08	0.00278491	0.00112146	0.00112146	TRUE	0.00447208	No
orf19.1433.1	12	6	14	7	4	4	5	9	11	8	14	6	3	4	4	13	7.86	10	6	0.595	-0.749	-1.337	0.181258	NA	0.124956	0.186638	0.161801	0.161801	TRUE	0.734194	No
orf19.1434	1283	895	1155	1299	1169	1044	1184	733	1151	1139	1182	1071	1000	996	1057	1034	1078.69	1136	1022	0.9	-0.152	-2.888	0.00387356	0.00857809	1.71717e-06	0.00332532	0.00173661	0.00173661	TRUE	0.0189491	No
orf19.1435	11108	6220	9088	11181	11795	8193	9107	5622	9965	7919	9298	9220	10087	7818	8126	7929	8795.3	9100	8490	0.933	-0.1	-1.136	0.255835	0.338403	0.0116898	0.00214458	0.00734493	0.00734493	TRUE	0.196574	No
orf19.1438	383	261	326	417	378	356	390	239	344	332	334	344	323	340	348	337	337.67	338	337	0.995	-0.008	-0.102	0.919053	0.940339	1e-08	0.00627875	0.00268429	0.00268429	TRUE	0.00983108	No
orf19.1439	1846	1572	1694	2153	1628	1784	1863	1137	1656	2001	1733	1775	1392	1702	1662	1604	1690.81	1791	1590	0.888	-0.171	-2.247	0.024659	0.0450444	0.00640207	0.0028381	0.00496994	0.00496994	TRUE	0.0871189	No
orf19.144	1971	1823	2011	2425	2494	2821	2959	1674	1768	2321	2057	2000	2133	2692	2640	2361	2246.54	2036	2456	1.207	0.272	3.016	0.0025584	0.00589826	0.0112211	0.00262572	0.00735251	0.00735251	TRUE	0.105138	No
orf19.1440	1027	730	883	1149	960	1021	1009	632	921	929	903	947	821	974	900	891	911.07	925	896	0.968	-0.046	-0.753	0.451568	0.537231	0.00172614	0.00357293	0.00254899	0.00254899	TRUE	0.04213	No
orf19.1440.1	16	19	9	26	9	23	9	9	14	24	9	21	8	22	8	13	14.94	17	13	0.727	-0.461	-1.041	0.298096	NA	0.144214	0.0991172	0.119055	0.119055	TRUE	0.580765	No
orf19.1440.2	374	288	333	367	240	212	213	101	336	367	341	303	205	202	190	142	260.69	337	185	0.557	-0.843	-7.494	6.70582e-14	6.94631e-13	0.00860301	0.00754812	0.00797695	0.00797695	TRUE	0.208822	No
orf19.1441	5233	3829	4617	5895	4737	4366	4800	2814	4695	4875	4724	4861	4051	4166	4283	3969	4452.9	4789	4117	0.861	-0.217	-5.876	4.19394e-09	2.46066e-08	0.0004392	0.00230553	0.00107704	0.00107704	TRUE	0.00897238	No
orf19.1442	486	353	458	515	441	374	372	265	436	449	469	425	377	357	332	374	402.3	445	360	0.809	-0.305	-3.998	6.39039e-05	0.00020239	1e-08	0.00558805	0.00308699	0.00308699	TRUE	0.0332852	No
orf19.1444	2192	1590	2106	2539	2408	2138	2475	1734	1966	2024	2155	2094	2059	2040	2209	2446	2124.08	2060	2188	1.061	0.085	1.353	0.17611	0.247501	0.00382484	0.00266297	0.00330033	0.00330033	TRUE	0.0723615	No
orf19.1445	68	48	62	86	85	74	78	44	61	61	63	71	73	71	70	62	66.43	64	69	1.075	0.104	0.626	0.531162	0.613815	1e-08	0.0238333	0.0115093	0.0115093	TRUE	0.0518144	No
orf19.1446	3355	2422	3165	3998	3728	3390	3747	2246	3010	3083	3238	3297	3188	3235	3344	3168	3195.31	3157	3234	1.024	0.035	0.809	0.418684	0.506471	0.000766869	0.00243385	0.00144335	0.00144335	TRUE	0.0125769	No
orf19.1447	293	213	276	315	288	237	293	193	263	271	282	260	246	226	261	272	260.28	269	251	0.933	-0.101	-1.098	0.272109	0.356561	1e-08	0.00755693	0.00421331	0.00421331	TRUE	0.0503044	No
orf19.1448	4689	3229	3719	4879	3386	2972	3084	1870	4207	4111	3805	4023	2896	2836	2752	2637	3408.32	4036	2780	0.69	-0.536	-11.543	7.9762e-31	2.95809e-29	0.0013091	0.00240545	0.00176682	0.00176682	TRUE	0.0180803	No
orf19.1448.1	619	394	463	599	542	536	495	380	555	502	474	494	464	511	442	536	497.15	506	488	0.96	-0.059	-0.715	0.47437	0.560145	0.00416537	0.00489958	0.00452897	0.00452897	TRUE	0.0519862	No
orf19.1449	186	133	172	216	221	238	260	138	167	169	176	178	189	227	232	195	191.63	172	211	1.223	0.291	2.678	0.00741708	0.015382	1e-08	0.00955519	0.00608053	0.00608053	TRUE	0.063056	No
orf19.145	1272	1023	1131	1428	1372	1362	1420	861	1141	1302	1157	1178	1173	1300	1267	1214	1216.58	1194	1238	1.039	0.055	0.944	0.345132	0.432429	0.00181102	0.00317279	0.00247406	0.00247406	TRUE	0.0412993	No
orf19.1450	6	3	12	8	13	12	19	9	5	4	12	7	11	11	17	13	10.04	7	13	1.848	0.886	1.925	0.0542192	NA	0.00406835	0.146622	0.0952871	0.0952871	TRUE	0.629143	No
orf19.1451	659	549	629	748	822	760	750	537	591	699	644	617	703	725	669	757	675.66	638	714	1.12	0.164	2.362	0.0181923	0.0341667	0.00198864	0.00412809	0.00312647	0.00312647	TRUE	0.0454555	No
orf19.1453	12598	8212	11188	13219	14603	11721	13429	7928	11302	10455	11446	10901	12489	11184	11983	11182	11367.6	11026	11710	1.062	0.087	1.789	0.0735924	0.117623	0.00220213	0.00210723	0.00218101	0.00218101	TRUE	0.0246313	No
orf19.1456	12	8	12	15	20	6	2	4	11	10	12	12	17	6	2	6	9.48	11	8	0.674	-0.568	-1.023	0.306458	NA	0.233665	0.155087	0.187832	0.187832	TRUE	2.26525	No
orf19.1457	2094	1320	1844	2295	1954	1750	1922	1222	1879	1681	1887	1892	1671	1670	1715	1724	1764.7	1835	1695	0.922	-0.117	-2.373	0.01763	0.0331937	0.000955146	0.00280215	0.00177963	0.00177963	TRUE	0.0360523	No
orf19.1458	506	386	453	595	446	437	417	277	454	491	463	491	381	417	372	391	432.58	475	390	0.822	-0.283	-3.88	0.000104342	0.000318377	1e-08	0.00533542	0.00277441	0.00277441	TRUE	0.0260976	No
orf19.1459	658	401	589	690	554	513	595	387	590	511	603	569	474	489	531	546	539.06	568	510	0.893	-0.163	-2.148	0.0316774	0.0562737	0.00262267	0.00467256	0.00367135	0.00367135	TRUE	0.0489047	No
orf19.1460	3232	2263	2989	3662	2833	2316	2719	1620	2899	2881	3058	3020	2423	2210	2426	2285	2650.26	2964	2336	0.788	-0.343	-7.489	6.92115e-14	7.12025e-13	0.000971071	0.00252728	0.00163044	0.00163044	TRUE	0.0168591	No
orf19.1461	1463	983	1226	1535	1663	1352	1600	1061	1312	1251	1254	1266	1422	1290	1428	1496	1340.06	1271	1409	1.106	0.146	2.679	0.00737535	0.0153008	0.00137298	0.00306283	0.00209726	0.00209726	TRUE	0.0387362	No
orf19.1462	2936	2013	2622	3132	2175	1851	2029	1372	2634	2563	2683	2583	1860	1766	1811	1935	2229.23	2616	1843	0.703	-0.508	-12.003	3.42091e-33	1.50021e-31	0.000367024	0.00263073	0.00125194	0.00125194	TRUE	0.0121042	No
orf19.1464	4424	3115	4119	4911	5196	4681	5211	2968	3969	3966	4214	4050	4444	4466	4650	4186	4243.08	4050	4436	1.096	0.133	3.128	0.00176273	0.00421094	0.00102289	0.00232166	0.00149558	0.00149558	TRUE	0.0166916	No
orf19.1465	102	70	82	76	85	76	73	48	92	89	84	63	73	73	65	68	75.65	82	70	0.856	-0.224	-1.314	0.188958	0.261822	1e-08	0.021168	0.0145831	0.0145831	TRUE	0.266458	No
orf19.1466	1875	1340	1618	1957	1958	1709	1790	951	1682	1706	1655	1614	1675	1631	1597	1341	1612.62	1664	1561	0.941	-0.088	-1.332	0.183017	0.255213	0.0040598	0.00287973	0.00358087	0.00358087	TRUE	0.101129	No
orf19.1467	7605	5029	6126	7806	8783	7302	7533	5809	6822	6402	6268	6437	7511	6967	6722	8193	6915.4	6482	7348	1.133	0.18	2.923	0.00346842	0.00774657	0.00442547	0.00218945	0.00349951	0.00349951	TRUE	0.0720435	No
orf19.1468	4078	2822	3493	4212	4421	3907	4124	2494	3658	3593	3574	3473	3781	3728	3680	3518	3625.56	3574	3677	1.03	0.042	1.132	0.257828	0.340821	0.000340792	0.00237993	0.00107671	0.00107671	TRUE	0.00953909	No
orf19.147	9112	7719	8712	11163	13321	13905	15000	9272	8174	9827	8913	9205	11393	13268	13385	13077	10905.3	9030	12781	1.416	0.501	7.521	5.42031e-14	5.65369e-13	0.0054301	0.00211264	0.0041732	0.0041732	TRUE	0.06568	No
orf19.1470	10858	6818	8864	11237	10651	8522	9081	8039	9741	8680	9069	9266	9109	8131	8103	11338	9179.72	9189	9170	0.998	-0.004	-0.038	0.969638	0.978268	0.0126146	0.00213766	0.00823009	0.00823009	TRUE	0.307893	No
orf19.1471	5693	3729	4642	5675	5897	5129	5138	3238	5107	4747	4749	4680	5043	4894	4585	4567	4796.56	4821	4772	0.99	-0.014	-0.295	0.76833	0.819188	0.00154389	0.00228218	0.00197331	0.00197331	TRUE	0.0197464	No
orf19.1473	363	245	311	391	356	357	380	202	326	312	318	322	304	341	339	285	318.41	320	317	0.996	-0.005	-0.062	0.950557	0.964687	1e-08	0.00653878	0.00377722	0.00377722	TRUE	0.043118	No
orf19.1474	4286	2799	3909	4773	5234	4465	4970	3282	3845	3563	3999	3936	4476	4260	4435	4629	4143.01	3836	4450	1.159	0.213	4.582	4.60669e-06	1.76174e-05	0.00151384	0.00232992	0.00182292	0.00182292	TRUE	0.0267949	No
orf19.1476	36	28	32	47	33	29	32	20	32	36	33	39	28	28	29	28	31.51	35	28	0.807	-0.31	-1.304	0.192359	0.265706	1e-08	0.0480479	0.02223	0.02223	TRUE	0.0502185	No
orf19.1477	1342	1121	1201	1645	1899	1910	1981	1264	1204	1427	1229	1356	1624	1822	1768	1783	1526.66	1304	1749	1.342	0.425	6.525	6.79819e-11	5.06744e-10	0.00362585	0.00293042	0.00339202	0.00339202	TRUE	0.0456927	No
orf19.1478	958	608	861	1090	1181	1104	1173	738	859	774	881	899	1010	1053	1047	1041	945.53	853	1038	1.212	0.278	4.811	1.50282e-06	6.17996e-06	0.000842023	0.00351486	0.00213301	0.00213301	TRUE	0.0419277	No
orf19.1479	2827	1891	2459	3044	3460	2979	3222	2238	2536	2407	2516	2510	2959	2842	2875	3156	2725.33	2492	2958	1.185	0.244	5.504	3.70281e-08	1.90957e-07	0.000910672	0.00251219	0.00152092	0.00152092	TRUE	0.0230168	No
orf19.1480	1711	1152	1413	1794	1974	1675	1770	1287	1535	1467	1446	1479	1688	1598	1579	1815	1575.96	1482	1670	1.124	0.169	3.134	0.00172719	0.00413096	0.00155965	0.00290068	0.00216105	0.00216105	TRUE	0.037798	No
orf19.1481	4380	2943	3821	4805	7286	6788	7489	4549	3929	3747	3909	3962	6231	6477	6683	6416	5169.29	3887	6452	1.659	0.73	19.938	1.9004e-88	7.13601e-86	0.000445795	0.00226035	0.00108103	0.00108103	TRUE	0.00727822	No
orf19.1482	1392	904	1073	1458	1737	1310	1469	792	1249	1151	1098	1202	1486	1250	1311	1117	1232.89	1175	1291	1.101	0.138	1.694	0.0902777	0.140442	0.00747294	0.003157	0.00557524	0.00557524	TRUE	0.124214	No
orf19.1483	1195	888	977	1310	1290	1339	1284	737	1072	1131	1000	1080	1103	1278	1146	1039	1106.06	1071	1142	1.069	0.096	1.382	0.16688	0.236411	0.00395398	0.00329202	0.00370171	0.00370171	TRUE	0.0765236	No
orf19.1484	923	944	919	1177	1039	1252	1224	773	828	1202	940	971	889	1195	1092	1090	1025.79	985	1066	1.084	0.116	1.033	0.301381	0.387315	0.0175221	0.00339473	0.011108	0.011108	TRUE	0.255264	No
orf19.1485	888	773	753	981	923	822	823	465	797	984	770	809	789	784	734	656	790.5	840	741	0.886	-0.174	-1.985	0.0471432	0.0798748	0.00852336	0.00381595	0.00611125	0.00611125	TRUE	0.151093	No
orf19.1486	1485	1330	1399	1934	2013	2099	2271	1619	1332	1693	1431	1595	1722	2003	2026	2283	1760.73	1513	2008	1.327	0.408	4.445	8.78791e-06	3.2312e-05	0.0114849	0.00280401	0.00751532	0.00751532	TRUE	0.112643	No
orf19.1488	359	332	359	450	460	504	478	317	322	423	367	371	393	481	427	447	403.88	371	437	1.181	0.24	2.508	0.0121531	0.0239553	0.00705672	0.00557391	0.00630887	0.00630887	TRUE	0.0932857	No
orf19.149	13	8	13	19	17	12	11	15	12	10	13	16	15	11	10	21	13.47	13	14	1.079	0.11	0.286	0.774991	NA	1e-08	0.109737	0.0672573	0.0672573	TRUE	0.321169	No
orf19.1490	2860	1983	2633	3186	3578	3311	3619	2607	2566	2525	2694	2627	3060	3159	3229	3677	2942.11	2603	3281	1.259	0.332	5.642	1.68377e-08	9.07271e-08	0.0033967	0.00247294	0.0029766	0.0029766	TRUE	0.0773539	No
orf19.1490.1	44	31	25	34	43	36	30	15	39	39	26	28	37	34	27	21	31.45	33	30	0.917	-0.124	-0.466	0.640974	0.711036	0.0191557	0.0481377	0.036687	0.036687	TRUE	0.174858	No
orf19.1491	1736	1377	1557	1930	2251	2271	2313	1388	1557	1753	1593	1592	1925	2167	2064	1958	1826.07	1624	2028	1.252	0.324	5.765	8.15712e-09	4.58447e-08	0.00218534	0.00277451	0.00247045	0.00247045	TRUE	0.0328867	No
orf19.1492	565	577	575	755	856	992	930	686	507	735	588	623	732	947	830	968	741.04	613	869	1.418	0.504	4.416	1.00464e-05	3.65588e-05	0.0179524	0.00393852	0.0111101	0.0111101	TRUE	0.201099	No
orf19.1493	3762	2640	3318	4035	3457	3088	3362	1999	3375	3361	3395	3327	2957	2946	3000	2819	3147.54	3364	2930	0.872	-0.197	-5.642	1.68043e-08	9.06287e-08	1e-08	0.00244074	0.000852109	0.000852109	TRUE	0.00709394	No
orf19.1494	9155	6395	7983	10116	9007	7641	8335	5984	8213	8142	8167	8342	7703	7291	7438	8440	7966.88	8216	7718	0.939	-0.091	-1.914	0.0556158	0.0921256	0.00208052	0.00216174	0.00205783	0.00205783	TRUE	0.0473495	No
orf19.1495	613	593	590	765	622	747	718	457	550	755	604	631	532	713	641	645	633.66	635	633	0.998	-0.003	-0.03	0.975704	0.982573	0.0146351	0.00427049	0.00954953	0.00954953	TRUE	0.182985	No
orf19.1496	289	269	325	420	462	510	489	284	259	342	333	346	395	487	436	401	374.9	320	430	1.346	0.428	3.99	6.61002e-05	0.000209016	0.0108786	0.00585173	0.00834075	0.00834075	TRUE	0.193936	No
orf19.1497	414	342	353	431	489	462	509	294	371	435	361	355	418	441	454	415	406.41	380	432	1.141	0.191	2.316	0.0205453	0.0381683	0.00236618	0.00555156	0.00404783	0.00404783	TRUE	0.0957714	No
orf19.1499	2981	2222	2700	3404	2920	2793	3238	2021	2674	2829	2762	2807	2497	2665	2889	2850	2746.82	2768	2725	0.984	-0.023	-0.439	0.660564	0.728731	0.0022154	0.00250803	0.00232746	0.00232746	TRUE	0.0394303	No
orf19.150	4362	3066	3746	4768	5012	4113	4425	2809	3913	3903	3833	3932	4286	3924	3949	3962	3962.77	3895	4030	1.035	0.05	1.248	0.212133	0.289527	0.00063007	0.00234586	0.00127705	0.00127705	TRUE	0.0229527	No
orf19.1500	699	534	644	823	945	925	987	613	627	680	659	679	808	883	881	865	760.07	661	859	1.3	0.378	6.343	2.2462e-10	1.56194e-09	1e-08	0.00388948	0.0020712	0.0020712	TRUE	0.0204967	No
orf19.1502	339	340	310	446	483	561	566	346	304	433	317	368	413	535	505	488	420.42	356	485	1.369	0.453	3.873	0.000107579	0.000327921	0.0160029	0.00543252	0.0106938	0.0106938	TRUE	0.228556	No
orf19.1504	2457	2001	2360	2840	2559	2611	2706	1516	2204	2547	2415	2342	2189	2491	2415	2138	2342.6	2377	2308	0.973	-0.04	-0.629	0.529511	0.61226	0.00370902	0.00259922	0.00346484	0.00346484	TRUE	0.0342763	No
orf19.1505	2451	2081	2318	2917	2297	2270	2269	1430	2199	2649	2372	2405	1964	2166	2025	2017	2224.64	2406	2043	0.85	-0.235	-3.873	0.000107684	0.000328077	0.00326155	0.00263208	0.00306591	0.00306591	TRUE	0.054299	No
orf19.1506	0	0	0	0	0	0	0	0	0	0	0	0	0	0	0	0	0	0	0	NA	NA	NA	NA	NA	NA	NA	NA	NA	NA	NA	NA
orf19.1507	211	188	205	269	255	281	303	147	189	239	210	222	218	268	270	207	228.01	215	241	1.129	0.175	1.485	0.137501	0.200267	0.00954722	0.00834628	0.00890452	0.00890452	TRUE	0.0823712	No
orf19.1508	21	14	17	22	26	20	19	15	19	18	17	18	22	19	17	21	18.95	18	20	1.095	0.131	0.43	0.666858	0.734057	1e-08	0.0785729	0.036605	0.036605	TRUE	0.0602106	No
orf19.1509	8150	6298	7433	9415	9211	9071	9649	5932	7311	8018	7605	7764	7878	8655	8610	8367	8025.92	7674	8378	1.092	0.127	2.862	0.00421451	0.00922432	0.00148254	0.0021604	0.00175752	0.00175752	TRUE	0.0200503	No
orf19.151	1035	822	1074	1216	1172	1129	1268	797	929	1046	1099	1003	1002	1077	1131	1124	1051.46	1019	1084	1.064	0.089	1.34	0.180282	0.252013	0.00318903	0.00336017	0.0032647	0.0032647	TRUE	0.0436169	No
orf19.1510	1244	920	1133	1504	1222	1151	1251	742	1116	1171	1159	1240	1045	1098	1116	1047	1124.1	1172	1076	0.919	-0.122	-2.267	0.0233748	0.0430124	0.00083319	0.00327095	0.00186743	0.00186743	TRUE	0.0201665	No
orf19.1513	4918	3706	4628	5288	6521	6281	6545	3767	4412	4718	4735	4361	5577	5993	5840	5313	5118.62	4556	5681	1.248	0.32	6.434	1.24238e-10	8.9178e-10	0.00206699	0.00226313	0.00217236	0.00217236	TRUE	0.0224292	No
orf19.1514	2152	1522	1852	2408	2396	2069	2312	1342	1931	1938	1895	1986	2049	1974	2063	1893	1965.98	1938	1995	1.031	0.044	1.02	0.307568	0.393582	0.000381839	0.00271793	0.00131119	0.00131119	TRUE	0.0129052	No
orf19.1515	276	201	216	264	259	257	237	151	248	256	221	218	222	245	211	213	229.17	236	223	0.95	-0.073	-0.734	0.462984	0.548858	1e-08	0.00831411	0.00526316	0.00526316	TRUE	0.0512501	No
orf19.1516	1624	1210	1460	1849	1185	1164	1198	653	1457	1540	1494	1525	1013	1111	1069	921	1266.24	1504	1028	0.686	-0.543	-9.118	7.68527e-20	1.36204e-18	0.00209639	0.00312599	0.00258753	0.00258753	TRUE	0.0523849	No
orf19.1517	1710	1108	1358	1786	2073	1709	1802	1143	1534	1411	1389	1473	1773	1631	1608	1612	1553.8	1452	1656	1.141	0.19	3.546	0.000390959	0.00107994	0.00154615	0.00291381	0.00210061	0.00210061	TRUE	0.0283041	No
orf19.1519	933	668	829	1017	1148	1003	1108	713	837	850	848	839	982	957	989	1006	913.42	844	984	1.165	0.22	4.401	1.07903e-05	3.90208e-05	1e-08	0.00356882	0.00131006	0.00131006	TRUE	0.00374943	No
orf19.1522	74	44	60	65	72	73	73	42	66	56	61	54	62	70	65	59	61.62	59	64	1.079	0.11	0.634	0.525988	0.60936	1e-08	0.0255367	0.0129293	0.0129293	TRUE	0.0610396	No
orf19.1523	1423	971	1336	1501	1491	1198	1390	898	1277	1236	1367	1238	1275	1143	1240	1267	1255.31	1280	1231	0.962	-0.056	-0.995	0.319549	0.406296	0.00157336	0.00313597	0.00224576	0.00224576	TRUE	0.028353	No
orf19.1524	10	4	6	4	5	6	5	4	9	5	6	3	4	6	4	6	5.45	6	5	0.846	-0.241	-0.411	0.681428	NA	1e-08	0.268316	0.14523	0.14523	TRUE	0.348611	No
orf19.1525	1618	1250	1469	1764	1543	1524	1580	1082	1452	1591	1503	1455	1320	1454	1410	1526	1463.77	1500	1428	0.951	-0.073	-1.284	0.199307	0.273825	0.00186438	0.00297128	0.00240156	0.00240156	TRUE	0.0315163	No
orf19.1526	3088	2228	3004	3428	3719	3285	3732	2354	2770	2836	3073	2827	3181	3134	3330	3320	3059.03	2876	3241	1.127	0.172	3.781	0.000156353	0.000462744	0.0011161	0.00245409	0.00165436	0.00165436	TRUE	0.0257326	No
orf19.1527	1260	911	1015	1316	1130	1019	1074	723	1130	1160	1038	1085	966	972	958	1020	1041.32	1103	979	0.887	-0.173	-3.228	0.00124795	0.00308293	0.000452967	0.00337361	0.00180648	0.00180648	TRUE	0.0179661	No
orf19.1528	3833	2894	3379	4031	3731	3727	3950	2253	3439	3684	3457	3324	3191	3556	3525	3178	3419.18	3476	3362	0.969	-0.046	-0.863	0.388139	0.477269	0.0024102	0.0024041	0.00245329	0.00245329	TRUE	0.0193176	No
orf19.1529	15	11	12	13	17	9	12	14	13	14	12	11	15	9	11	20	13	12	14	1.042	0.06	0.153	0.878154	NA	1e-08	0.113608	0.0676496	0.0676496	TRUE	0.288496	No
orf19.1530	4	0	4	3	1	5	7	0	4	0	4	2	1	5	6	0	2.75	2	3	1.18	0.238	0.244	0.807486	NA	0.643875	0.529222	0.56576	0.56576	TRUE	0.18574	No
orf19.1531	2716	2582	2760	3465	3032	3448	3332	2018	2437	3287	2824	2857	2593	3290	2973	2846	2888.4	2851	2926	1.027	0.038	0.421	0.673751	0.739397	0.0119736	0.00248212	0.00752208	0.00752208	TRUE	0.12712	No
orf19.1532	494	472	471	580	466	494	499	355	443	601	482	478	399	471	445	501	477.51	501	454	0.906	-0.142	-1.375	0.168983	0.238938	0.0111891	0.00501966	0.00808107	0.00808107	TRUE	0.198268	No
orf19.1533	2404	1893	2104	2611	2622	2660	2720	1558	2157	2410	2153	2153	2242	2538	2427	2197	2284.67	2218	2351	1.062	0.087	1.437	0.150789	0.216603	0.00337642	0.00261493	0.00305482	0.00305482	TRUE	0.0396901	No
orf19.1534	580	467	524	629	776	818	882	470	520	595	536	519	664	781	787	663	632.97	542	724	1.34	0.422	5.187	2.13645e-07	1.00045e-06	0.00515963	0.004273	0.00473722	0.00473722	TRUE	0.0454285	No
orf19.1535	85	63	84	113	144	113	136	66	76	80	86	93	123	108	121	93	97.62	84	111	1.336	0.418	2.823	0.00475697	0.0103176	1e-08	0.0168497	0.0106857	0.0106857	TRUE	0.0954751	No
orf19.1536	1309	1080	1278	1560	1257	1403	1423	1030	1174	1375	1308	1286	1075	1339	1270	1453	1284.93	1286	1284	0.997	-0.004	-0.044	0.964746	0.974642	0.00919538	0.00310932	0.00636828	0.00636828	TRUE	0.146213	No
orf19.1538	172	132	130	214	247	223	226	143	154	168	133	176	211	213	202	202	182.4	158	207	1.31	0.389	3.488	0.000486075	0.00131784	0.00108645	0.00993841	0.00639266	0.00639266	TRUE	0.117467	No
orf19.1539	206	178	211	254	277	318	302	212	185	227	216	209	237	303	269	299	243.19	209	277	1.324	0.405	3.71	0.000207359	0.000602717	0.00645643	0.00794882	0.00723645	0.00723645	TRUE	0.113638	No
orf19.154	2189	1838	1980	2612	2489	2664	2685	1616	1964	2340	2026	2154	2129	2542	2396	2279	2228.63	2121	2336	1.103	0.141	2.025	0.0428161	0.0734212	0.00528426	0.00263091	0.00419643	0.00419643	TRUE	0.0568215	No
orf19.1541	61	33	58	47	30	40	40	23	55	42	59	39	26	38	36	32	40.85	49	33	0.676	-0.565	-2.396	0.0165703	0.0314975	0.0152344	0.0375181	0.0279829	0.0279829	TRUE	0.16507	No
orf19.1542	3776	2642	3366	4144	4469	3948	4337	2562	3387	3364	3444	3417	3822	3767	3870	3613	3585.57	3403	3768	1.108	0.148	4.208	2.57732e-05	8.7781e-05	0.000116655	0.0023844	0.000914748	0.000914748	TRUE	0.00852623	No
orf19.1543	1060	733	881	1137	1017	916	966	637	951	933	901	938	870	874	862	898	903.41	931	876	0.94	-0.09	-1.766	0.0774527	0.123105	1e-08	0.00358644	0.0013844	0.0013844	TRUE	0.00541599	No
orf19.1544	413	259	300	425	312	271	294	219	371	330	307	350	267	259	262	309	306.78	340	274	0.801	-0.32	-3.439	0.000583387	0.00154882	0.00298096	0.00671153	0.00500348	0.00500348	TRUE	0.0681124	No
orf19.1545	1117	780	899	1155	1507	1230	1313	855	1002	993	920	952	1289	1174	1172	1206	1088.41	967	1210	1.253	0.325	5.868	4.41686e-09	2.5864e-08	0.00103226	0.0033133	0.00201208	0.00201208	TRUE	0.0247301	No
orf19.1546	1323	864	1091	1278	1567	1420	1459	895	1187	1100	1116	1054	1340	1355	1302	1262	1214.52	1114	1315	1.182	0.241	4.514	6.36835e-06	2.38982e-05	0.000933677	0.00317481	0.0018999	0.0018999	TRUE	0.0244322	No
orf19.1547	358	270	343	418	352	333	340	227	321	344	351	345	301	318	303	320	325.36	340	310	0.912	-0.133	-1.681	0.092822	0.143731	1e-08	0.00644141	0.00294397	0.00294397	TRUE	0.0170778	No
orf19.1548	925	676	807	1075	1059	814	898	519	830	861	826	886	906	777	801	732	827.28	851	804	0.948	-0.077	-1.094	0.274039	0.358387	0.00314683	0.00373431	0.00354866	0.00354866	TRUE	0.0878112	No
orf19.1549	2768	2045	2419	2778	2575	2496	2742	1400	2483	2604	2475	2291	2202	2382	2447	1975	2357.19	2463	2252	0.916	-0.127	-1.837	0.0661529	0.107592	0.00521774	0.00259538	0.00414881	0.00414881	TRUE	0.0793431	No
orf19.155	1845	1685	1735	2298	2285	2371	2402	1551	1655	2145	1775	1895	1954	2262	2143	2188	2002.23	1868	2137	1.145	0.195	2.504	0.0122628	0.0241477	0.00750212	0.00270456	0.00533702	0.00533702	TRUE	0.117847	No
orf19.1551	16	5	11	12	10	13	12	4	14	6	11	10	9	12	11	6	9.9	10	10	0.895	-0.159	-0.36	0.718735	NA	1e-08	0.148663	0.0886732	0.0886732	TRUE	0.238198	No
orf19.1552	3224	2106	2521	3299	3135	2407	2418	1645	2892	2681	2579	2720	2681	2297	2158	2320	2541.08	2718	2364	0.87	-0.201	-2.962	0.00305511	0.00692646	0.00508519	0.00255081	0.00403735	0.00403735	TRUE	0.101199	No
orf19.1553	6587	4521	5745	7377	6783	5957	6498	4109	5909	5756	5878	6083	5801	5684	5798	5795	5838.07	5906	5770	0.976	-0.035	-1.122	0.261908	0.34553	0.000149991	0.00222818	0.000745459	0.000745459	TRUE	0.00503543	No
orf19.1555	2180	1545	1977	2300	2182	2111	2191	1361	1956	1967	2023	1897	1866	2014	1955	1920	1949.62	1961	1939	0.99	-0.015	-0.349	0.72693	0.785927	0.000435608	0.00272413	0.00130537	0.00130537	TRUE	0.00854104	No
orf19.1557	189	148	173	244	149	106	141	95	170	188	177	201	127	101	126	134	153.07	184	122	0.66	-0.598	-4.842	1.28539e-06	5.3333e-06	0.00273373	0.0114635	0.00784409	0.00784409	TRUE	0.137595	No
orf19.1559	5152	3326	4327	5539	5067	4228	4786	3069	4622	4234	4427	4568	4333	4034	4271	4329	4352.21	4463	4242	0.95	-0.075	-1.756	0.0790842	0.1253	0.000998931	0.00231308	0.00150057	0.00150057	TRUE	0.0139913	No
orf19.156	2847	1972	2624	3156	3098	2892	3073	1769	2554	2511	2685	2602	2650	2759	2742	2495	2624.73	2588	2662	1.03	0.042	0.933	0.350905	0.438486	0.000941551	0.00253261	0.00156057	0.00156057	TRUE	0.0198374	No
orf19.1560	5899	3963	5201	6485	5786	5000	5449	3380	5292	5045	5321	5348	4948	4771	4862	4767	5044.35	5252	4837	0.921	-0.119	-3.502	0.000461563	0.00125706	0.000245994	0.00226731	0.000906287	0.000906287	TRUE	0.00812445	No
orf19.1562	26899	19289	23871	30259	32160	29870	31589	22185	24131	24557	24422	24952	27504	28501	28188	31290	26693.2	24516	28871	1.177	0.236	5.407	6.40436e-08	3.22256e-07	0.00171057	0.00203391	0.00178599	0.00178599	TRUE	0.038701	No
orf19.1563	3324	2246	2974	3639	2834	2517	2683	1762	2982	2859	3043	3001	2424	2402	2394	2485	2698.68	2971	2426	0.815	-0.295	-7.89	3.0203e-15	3.54413e-14	1e-08	0.00251745	0.000962931	0.000962931	TRUE	0.00721313	No
orf19.1564	1427	1152	1412	1773	1483	1381	1438	1016	1280	1467	1445	1462	1268	1318	1283	1433	1369.45	1414	1326	0.937	-0.095	-1.534	0.12504	0.184761	0.00260301	0.00303958	0.00291737	0.00291737	TRUE	0.0495746	No
orf19.1565	854	589	770	984	984	875	921	589	766	750	788	811	842	835	822	831	805.53	779	832	1.067	0.094	1.73	0.0836115	0.131468	1e-08	0.0037817	0.00156627	0.00156627	TRUE	0.00996899	No
orf19.1566	18607	13439	17034	20148	18399	16883	17981	11461	16692	17109	17427	16614	15735	16109	16045	16165	16487.2	16960	16014	0.944	-0.083	-2.939	0.00328968	0.00740239	0.000241024	0.00206757	0.000701977	0.000701977	TRUE	0.00423702	No
orf19.1567	2473	1871	2225	2658	3284	3156	3346	1915	2219	2382	2276	2192	2809	3011	2986	2701	2571.92	2267	2877	1.271	0.346	7.021	2.19938e-12	1.94322e-11	0.00148551	0.00254397	0.00194081	0.00194081	TRUE	0.0192202	No
orf19.1569	9463	7089	8815	10579	10173	9891	10562	6839	8489	9025	9019	8724	8700	9438	9425	9646	9058.14	8814	9302	1.055	0.078	1.837	0.0662433	0.10771	0.00127138	0.00213979	0.00160053	0.00160053	TRUE	0.0233866	No
orf19.1570	790	559	703	896	1001	889	925	526	709	712	719	739	856	848	825	742	768.76	720	818	1.14	0.189	3.113	0.00184929	0.00440086	0.000629673	0.00386788	0.00224783	0.00224783	TRUE	0.0401078	No
orf19.1571	1	1	0	1	1	3	2	1	1	1	0	1	1	3	2	1	1.24	1	2	2.352	1.234	0.974	0.329967	NA	1e-08	1.17417	0.582708	0.582708	TRUE	0.167325	No
orf19.1573	1958	1312	1700	2140	2338	2099	2171	1376	1757	1670	1739	1765	2000	2003	1937	1941	1851.39	1733	1970	1.136	0.184	4.526	6.01232e-06	2.2647e-05	1e-08	0.00276364	0.00104888	0.00104888	TRUE	0.006467	No
orf19.1574	1949	1171	1619	1989	2188	1819	2106	1194	1748	1491	1656	1640	1871	1736	1879	1684	1713.25	1634	1792	1.097	0.134	2.221	0.0263491	0.0479422	0.00284161	0.00282686	0.00289151	0.00289151	TRUE	0.0398147	No
orf19.1575	11415	7593	9926	12482	11725	10114	10546	6747	10240	9667	10155	10293	10028	9650	9411	9516	9869.98	10089	9651	0.956	-0.064	-1.805	0.0710361	0.114175	0.000659438	0.00212661	0.00111244	0.00111244	TRUE	0.0094911	No
orf19.1576	1462	1123	1293	1565	1574	1379	1547	967	1312	1430	1323	1291	1346	1316	1380	1364	1345.11	1339	1352	1.012	0.017	0.336	0.736631	0.793986	0.000403622	0.00305877	0.00156579	0.00156579	TRUE	0.023251	No
orf19.1577	87	49	61	96	69	69	65	53	78	62	62	79	59	66	58	75	67.45	70	64	0.897	-0.157	-0.897	0.369678	0.458226	1e-08	0.023502	0.0144988	0.0144988	TRUE	0.0787067	No
orf19.1578	13411	10868	12633	14847	12235	12656	12802	7283	12031	13836	12925	12243	10464	12076	11424	10272	11908.8	12759	11059	0.867	-0.206	-3.275	0.00105709	0.00265177	0.00483606	0.00210142	0.00370779	0.00370779	TRUE	0.0468366	No
orf19.158	5174	4882	4808	6060	5391	6152	6296	3163	4642	6215	4919	4997	4611	5870	5618	4461	5166.62	5193	5140	0.99	-0.014	-0.136	0.891982	0.918428	0.0157029	0.0022605	0.0100707	0.0100707	TRUE	0.212911	No
orf19.1580	344	258	332	427	293	308	303	201	309	328	340	352	251	294	270	283	303.4	332	274	0.824	-0.28	-3.175	0.00150086	0.00363889	1e-08	0.00676434	0.00412721	0.00412721	TRUE	0.0421184	No
orf19.1581	20	23	20	26	21	12	18	7	18	29	20	21	18	11	16	10	18.06	22	14	0.643	-0.638	-1.898	0.0576435	0.095039	1e-08	0.0823671	0.050617	0.050617	TRUE	0.202217	No
orf19.1582	88	56	86	73	89	55	84	51	79	71	88	60	76	52	75	72	71.74	74	69	0.925	-0.112	-0.605	0.544855	0.626385	0.0144306	0.0222157	0.0188468	0.0188468	TRUE	0.243209	No
orf19.1584	13043	8834	11609	14064	17607	14400	15754	9476	11701	11247	11877	11597	15058	13740	14058	13365	12830.4	11606	14055	1.211	0.277	6.442	1.17633e-10	8.49446e-10	0.00149132	0.00209267	0.00169128	0.00169128	TRUE	0.0283135	No
orf19.1585	1509	997	1304	1647	1219	1034	1158	797	1354	1269	1334	1358	1043	987	1033	1124	1187.73	1329	1047	0.785	-0.35	-6.561	5.34994e-11	4.06352e-10	0.000828841	0.00320177	0.00187532	0.00187532	TRUE	0.025924	No
orf19.1586	123	79	84	140	149	117	111	73	110	101	86	115	127	112	99	103	106.67	103	110	1.069	0.096	0.654	0.51285	0.597169	0.00629947	0.0155885	0.0115484	0.0115484	TRUE	0.125796	No
orf19.1587	178	96	165	160	102	110	99	79	160	122	169	132	87	105	88	111	121.83	146	98	0.665	-0.588	-3.965	7.33895e-05	0.000229768	0.010744	0.0138957	0.0125062	0.0125062	TRUE	0.113063	No
orf19.1588	928	591	788	965	1124	940	1089	598	833	752	806	796	961	897	972	843	857.53	797	918	1.155	0.207	3.303	0.000955602	0.00241027	0.00165615	0.00367241	0.00261117	0.00261117	TRUE	0.0319419	No
orf19.1589	2142	1518	2012	2263	1835	1628	1789	1134	1922	1933	2058	1866	1569	1553	1596	1599	1762.16	1945	1579	0.812	-0.3	-6.603	4.02734e-11	3.09812e-10	0.000526957	0.00280334	0.00140223	0.00140223	TRUE	0.0189381	No
orf19.1589.1	275	163	217	262	172	139	155	75	247	208	222	216	147	133	138	106	177.01	223	131	0.593	-0.755	-6.376	1.81888e-10	1.2692e-09	0.00331478	0.0101806	0.00745104	0.00745104	TRUE	0.132696	No
orf19.1590	644	618	596	724	695	744	813	452	578	787	610	597	594	710	725	638	654.82	643	667	1.041	0.058	0.561	0.574537	0.652764	0.0130659	0.00419647	0.0087182	0.0087182	TRUE	0.256669	No
orf19.1591	1810	1169	1543	2004	1521	1327	1370	1009	1624	1488	1579	1653	1301	1266	1222	1423	1444.47	1586	1303	0.819	-0.289	-4.96	7.03531e-07	3.03869e-06	0.00227777	0.00298453	0.00254885	0.00254885	TRUE	0.042175	No
orf19.1592	1469	1088	1292	1677	1555	1505	1551	1165	1318	1385	1322	1383	1330	1436	1384	1643	1400.09	1352	1448	1.068	0.095	1.449	0.147342	0.212388	0.00389374	0.00301638	0.00344195	0.00344195	TRUE	0.0929243	No
orf19.1595	585	496	545	751	659	778	778	447	525	631	558	619	564	742	694	630	620.47	583	658	1.129	0.175	1.841	0.0656674	0.106861	0.00952824	0.0043192	0.00704893	0.00704893	TRUE	0.116062	No
orf19.1596	449	314	356	445	447	419	491	318	403	400	364	367	382	400	438	449	400.31	384	417	1.086	0.118	1.461	0.144059	0.20838	0.00187611	0.00560598	0.00380517	0.00380517	TRUE	0.0379712	No
orf19.1597	1716	1260	1489	1861	1744	1683	1667	1141	1539	1604	1523	1535	1492	1606	1488	1609	1549.47	1550	1549	0.998	-0.003	-0.062	0.950463	0.964687	0.000558876	0.00291643	0.00153866	0.00153866	TRUE	0.0084684	No
orf19.1598	622	443	586	705	649	489	570	408	558	564	600	581	555	467	509	575	551.07	576	526	0.911	-0.134	-1.766	0.0774005	0.123054	0.00271782	0.00461384	0.00367801	0.00367801	TRUE	0.0677742	No
orf19.1599	12	12	10	27	13	15	8	5	11	15	10	22	11	14	7	7	12.27	14	10	0.681	-0.554	-1.284	0.198982	NA	0.0613637	0.120293	0.0946921	0.0946921	TRUE	0.684508	No
orf19.1600	1156	754	1003	1263	1483	1348	1386	983	1037	960	1026	1041	1268	1286	1237	1386	1155.3	1016	1294	1.269	0.343	6.339	2.31408e-10	1.60543e-09	0.000776741	0.00323609	0.00193428	0.00193428	TRUE	0.0247207	No
orf19.1601	27521	16599	22648	27974	27325	20869	22874	15894	24689	21132	23171	23068	23369	19913	20411	22417	22271.3	23015	21528	0.935	-0.097	-1.54	0.12367	0.183098	0.00483634	0.00204471	0.00373608	0.00373608	TRUE	0.0408066	No
orf19.1604	2402	1772	2185	2697	2610	2321	2521	1608	2155	2256	2235	2224	2232	2215	2250	2268	2229.32	2218	2241	1.011	0.015	0.416	0.677524	0.742127	1e-08	0.00263071	0.000876599	0.000876599	TRUE	0.00446902	No
orf19.1605	130	109	96	126	90	81	90	58	117	139	98	104	77	77	80	82	96.74	114	79	0.695	-0.525	-3.472	0.000517276	0.00139168	1e-08	0.0169865	0.0112355	0.0112355	TRUE	0.176769	No
orf19.1606	1810	1349	1558	1914	1299	1369	1365	817	1624	1717	1594	1578	1111	1306	1218	1152	1412.63	1628	1197	0.736	-0.442	-7.429	1.09792e-13	1.10677e-12	0.00229945	0.00300718	0.00267045	0.00267045	TRUE	0.0460185	No
orf19.1607	8815	6528	8179	9933	11431	11329	12154	6959	7908	8311	8368	8191	9776	10810	10845	9815	9253	8194	10312	1.259	0.332	7.121	1.06878e-12	9.80343e-12	0.0018376	0.00213641	0.00197828	0.00197828	TRUE	0.0152771	No
orf19.1608	726	549	699	828	750	712	749	434	651	699	715	683	641	679	668	612	668.68	687	650	0.95	-0.074	-1.193	0.232815	0.31334	1e-08	0.00415052	0.00219908	0.00219908	TRUE	0.0153875	No
orf19.1609	11491	8118	9979	12552	10109	9374	10243	6100	10309	10335	10209	10351	8646	8944	9140	8604	9567.17	10301	8834	0.858	-0.221	-7.167	7.67762e-13	7.12939e-12	0.000294328	0.00213126	0.000809267	0.000809267	TRUE	0.00672263	No
orf19.1610	70	58	76	63	116	97	109	55	63	74	78	52	99	93	97	78	79.12	67	92	1.401	0.486	2.845	0.00443429	0.00968066	0.00691944	0.0203281	0.0150824	0.0150824	TRUE	0.220979	No
orf19.1611	270	241	199	376	328	358	337	215	242	307	204	310	281	342	301	303	286.09	266	307	1.154	0.207	1.58	0.114114	0.17042	0.0193174	0.00705374	0.0129525	0.0129525	TRUE	0.272728	No
orf19.1613	5643	4041	5148	6241	5363	4999	5488	3636	5062	5145	5267	5146	4587	4770	4897	5128	5000.27	5155	4846	0.939	-0.091	-2.206	0.0273768	0.0495272	0.000968611	0.00226985	0.00141987	0.00141987	TRUE	0.0179683	No
orf19.1614	12763	9478	11548	14484	13144	12209	13313	7459	11450	12067	11815	11944	11241	11649	11880	10520	11570.6	11819	11322	0.959	-0.061	-1.404	0.160178	0.227991	0.00152687	0.00210499	0.00173355	0.00173355	TRUE	0.0272674	No
orf19.1616	1879	1346	1679	2046	2455	2233	2377	1584	1686	1714	1718	1687	2100	2131	2121	2234	1923.7	1701	2146	1.26	0.334	8.32	8.79745e-17	1.21786e-15	1e-08	0.00273416	0.00101792	0.00101792	TRUE	0.00817125	No
orf19.1617	543	449	532	672	497	527	521	296	487	572	544	554	425	503	465	417	495.93	539	452	0.842	-0.248	-3.015	0.00257374	0.00593134	0.00396751	0.00490673	0.0044362	0.0044362	TRUE	0.0643195	No
orf19.1618	9997	7600	9111	11062	8029	8034	8233	4951	8968	9676	9321	9122	6867	7666	7347	6983	8243.66	9272	7216	0.779	-0.361	-8.01	1.14554e-15	1.40458e-14	0.00164551	0.00215562	0.00182792	0.00182792	TRUE	0.0216064	No
orf19.1618.1	495	360	415	524	528	543	515	343	444	458	425	432	452	518	460	484	459.01	440	478	1.087	0.121	1.658	0.0973146	0.149378	1e-08	0.00514221	0.00292191	0.00292191	TRUE	0.0396031	No
orf19.1619	4297	2996	3634	4686	4620	4301	4516	2801	3855	3814	3718	3864	3951	4104	4030	3951	3910.82	3813	4009	1.051	0.072	2.179	0.029324	0.052481	1e-08	0.00235072	0.00080318	0.00080318	TRUE	0.00344691	No
orf19.1620	14	6	16	12	7	13	13	6	13	8	16	10	6	12	12	8	10.61	12	10	0.824	-0.279	-0.639	0.523094	NA	1e-08	0.138744	0.0886808	0.0886808	TRUE	0.285659	No
orf19.1621	712	537	619	765	745	689	725	483	639	684	633	631	637	657	647	681	651.16	647	656	1.014	0.02	0.336	0.736928	0.794015	1e-08	0.00420894	0.00189663	0.00189663	TRUE	0.0154868	No
orf19.1622	2856	2120	2560	3090	2920	2744	3050	1790	2562	2699	2619	2548	2497	2618	2722	2525	2598.76	2607	2590	0.995	-0.007	-0.168	0.866351	0.898039	0.000739219	0.00253814	0.00139534	0.00139534	TRUE	0.0144497	No
orf19.1623	9804	6651	8493	10540	10715	9628	10333	6261	8795	8467	8689	8691	9164	9187	9220	8831	8880.6	8660	9100	1.051	0.072	2.444	0.0145198	0.0280499	0.000175488	0.00214299	0.000713554	0.000713554	TRUE	0.00462038	No
orf19.1624	1233	1065	1244	1501	1069	1218	1133	703	1106	1356	1273	1238	914	1162	1011	992	1131.43	1243	1020	0.821	-0.284	-3.427	0.000610812	0.00161025	0.00747787	0.00326259	0.00569975	0.00569975	TRUE	0.107611	No
orf19.1624.1	25	16	33	21	28	37	25	25	22	20	34	17	24	35	22	35	26.34	23	29	1.234	0.303	1.007	0.313727	0.40027	0.0363294	0.0570998	0.0483229	0.0483229	TRUE	0.463547	No
orf19.1625	2397	1581	1894	2524	2435	2137	2200	1443	2150	2013	1938	2081	2082	2039	1963	2035	2037.76	2046	2030	0.992	-0.012	-0.265	0.790807	0.836909	0.000861586	0.00269192	0.00156147	0.00156147	TRUE	0.0155405	No
orf19.1626	2653	1763	2206	2872	2469	2107	2412	1416	2380	2244	2257	2368	2112	2010	2152	1997	2190.15	2312	2068	0.895	-0.161	-3.625	0.000289124	0.000818594	0.0006777	0.00264235	0.00143063	0.00143063	TRUE	0.00907973	No
orf19.1628	1283	871	1141	1370	1150	1005	1053	631	1151	1109	1167	1130	984	959	940	890	1041.12	1139	943	0.83	-0.27	-5.252	1.50739e-07	7.20475e-07	1e-08	0.00337388	0.00156083	0.00156083	TRUE	0.0145709	No
orf19.163	1973	1433	1741	2208	2298	2164	2302	1443	1770	1824	1781	1821	1965	2065	2054	2035	1914.48	1799	2030	1.128	0.174	4.358	1.31486e-05	4.69938e-05	1e-08	0.0027378	0.00100699	0.00100699	TRUE	0.00597074	No
orf19.1630	2848	1907	2417	3063	3281	2978	3368	2246	2555	2428	2473	2526	2806	2842	3005	3168	2725.26	2496	2955	1.182	0.241	5.041	4.6235e-07	2.05611e-06	0.00134471	0.00251221	0.00182724	0.00182724	TRUE	0.0268648	No
orf19.1631	2828	2081	2461	3096	2288	2192	2248	1314	2537	2649	2518	2553	1957	2092	2006	1853	2270.59	2564	1977	0.773	-0.372	-8.127	4.40739e-16	5.61008e-15	0.000928362	0.00261887	0.00156509	0.00156509	TRUE	0.019281	No
orf19.1632	485	416	453	573	404	419	435	241	435	530	463	473	346	400	388	340	421.76	475	368	0.779	-0.359	-4.16	3.17832e-05	0.000106618	0.00403899	0.00542155	0.00475218	0.00475218	TRUE	0.0632692	No
orf19.1633	10855	8724	10329	12382	10624	10652	11253	6640	9738	11107	10568	10210	9086	10164	10041	9365	10034.9	10406	9664	0.929	-0.106	-1.997	0.0458258	0.0779065	0.00286389	0.00212419	0.00261388	0.00261388	TRUE	0.0249356	No
orf19.1634	3055	2160	2656	3237	3381	3035	3201	1969	2741	2750	2717	2669	2892	2896	2856	2777	2787.26	2719	2855	1.051	0.072	2.061	0.0393283	0.0680543	1e-08	0.00250036	0.00082335	0.00082335	TRUE	0.00366566	No
orf19.1635	19013	12374	15166	19051	17038	14160	14512	10374	17057	15753	15516	15710	14571	13511	12950	14632	14962.5	16009	13916	0.869	-0.202	-3.96	7.50891e-05	0.000234356	0.00263827	0.00207655	0.00244409	0.00244409	TRUE	0.0268016	No
orf19.1636	1928	1217	1628	1973	1930	1569	1694	1150	1730	1549	1666	1627	1651	1497	1512	1622	1606.6	1643	1570	0.954	-0.068	-1.257	0.208671	0.28519	0.00143298	0.00288311	0.00214484	0.00214484	TRUE	0.0165657	No
orf19.1637	603	370	478	630	627	475	532	317	541	471	489	520	536	453	475	447	491.48	505	478	0.947	-0.079	-0.983	0.325561	0.412565	0.00344034	0.00493326	0.00417692	0.00417692	TRUE	0.0819453	No
orf19.1638	672	450	560	690	729	664	761	493	603	573	573	569	623	634	679	695	618.64	580	658	1.132	0.179	2.806	0.00501394	0.0108242	1e-08	0.00432613	0.00227321	0.00227321	TRUE	0.0148527	No
orf19.1639	76	56	72	112	104	66	82	46	68	71	74	92	89	63	73	65	74.43	76	72	0.952	-0.072	-0.402	0.687663	0.750769	0.0116653	0.021483	0.0171046	0.0171046	TRUE	0.229895	No
orf19.164	1313	1096	1185	1451	1170	1198	1195	734	1178	1395	1212	1197	1001	1143	1066	1035	1153.43	1246	1061	0.854	-0.228	-3.347	0.000816149	0.0020919	0.00375386	0.00323812	0.00356255	0.00356255	TRUE	0.0749824	No
orf19.1641	89	41	78	86	38	37	50	32	80	52	80	71	32	35	45	45	55.04	71	39	0.548	-0.867	-4.17	3.04994e-05	0.000102656	0.0114055	0.0283555	0.0217443	0.0217443	TRUE	0.23117	No
orf19.1642	8578	5894	6903	9010	7872	6899	7351	4468	7695	7504	7062	7430	6732	6583	6560	6302	6983.46	7423	6544	0.882	-0.181	-4.697	2.64136e-06	1.05095e-05	0.000819135	0.0021874	0.00128298	0.00128298	TRUE	0.0130319	No
orf19.1643	1990	1477	1837	2292	2767	2427	2667	1841	1785	1880	1879	1890	2366	2316	2380	2597	2136.71	1858	2415	1.297	0.375	7.842	4.43936e-15	5.12917e-14	0.00104284	0.00265893	0.001722	0.001722	TRUE	0.0289433	No
orf19.1646	12092	8132	10696	13220	12545	10706	12504	7437	10848	10353	10943	10901	10729	10215	11158	10489	10704.5	10761	10648	0.989	-0.015	-0.404	0.686303	0.74942	0.00081701	0.00211514	0.00129413	0.00129413	TRUE	0.0128091	No
orf19.1647	55	30	47	45	31	33	27	21	49	38	48	37	27	31	24	30	35.55	43	28	0.642	-0.639	-2.708	0.00676307	0.014196	1e-08	0.0428095	0.0240489	0.0240489	TRUE	0.0878928	No
orf19.1648	359	277	329	381	443	420	453	268	322	353	337	314	379	401	404	378	360.92	332	390	1.184	0.244	3.157	0.00159375	0.00383777	1e-08	0.0060018	0.00294798	0.00294798	TRUE	0.0189179	No
orf19.1649	3387	2357	2873	3699	3494	3137	3161	2089	3038	3001	2939	3050	2988	2993	2821	2946	2972.15	3007	2937	0.976	-0.035	-0.929	0.352633	0.440204	0.000233407	0.00246796	0.000996502	0.000996502	TRUE	0.0090846	No
orf19.1650	1139	701	890	1074	995	738	710	482	1022	892	911	886	851	704	634	680	822.37	928	717	0.774	-0.37	-4.066	4.78602e-05	0.000155429	0.00928044	0.00374479	0.00670069	0.00670069	TRUE	0.19348	No
orf19.1651	26	12	20	25	14	22	16	9	23	15	20	21	12	21	14	13	17.45	20	15	0.748	-0.418	-1.251	0.211016	0.288132	1e-08	0.0851625	0.0496264	0.0496264	TRUE	0.350757	No
orf19.1652	15913	10561	14015	16933	11107	9726	10252	7484	14276	13445	14339	13963	9499	9280	9148	10556	11813.2	14006	9621	0.686	-0.543	-10.884	1.38123e-27	4.41515e-26	0.00251853	0.00210241	0.00229981	0.00229981	TRUE	0.0514426	No
orf19.1653	2089	1728	1796	2448	2277	2200	2223	1227	1874	2200	1837	2019	1947	2099	1984	1731	1961.36	1982	1940	0.981	-0.028	-0.391	0.696012	0.758677	0.00591794	0.00271967	0.00449894	0.00449894	TRUE	0.0638368	No
orf19.1654	2105	1452	1712	2252	1520	1294	1379	1024	1888	1849	1752	1857	1300	1235	1231	1444	1569.37	1836	1302	0.707	-0.5	-8.614	7.06173e-18	1.08509e-16	0.00257901	0.00290454	0.00257586	0.00257586	TRUE	0.0590964	No
orf19.1655	5852	3731	5021	6147	2404	2002	2213	1558	5250	4750	5137	5069	2056	1910	1975	2197	3543.01	5052	2034	0.402	-1.315	-25.179	6.74264e-140	1.35033e-136	0.00229359	0.00238926	0.00226996	0.00226996	TRUE	0.0326763	No
orf19.1655.3	3388	2519	2947	3885	3569	3178	3256	2046	3039	3207	3015	3204	3052	3032	2905	2886	3042.61	3116	2969	0.954	-0.069	-1.675	0.0939778	0.145445	0.000525549	0.00245665	0.00127766	0.00127766	TRUE	0.00568931	No
orf19.1656	1178	912	1126	1351	1069	1042	1055	714	1057	1161	1152	1114	914	994	941	1007	1042.61	1121	964	0.859	-0.219	-3.898	9.68044e-05	0.00029719	0.000976919	0.0033719	0.00204818	0.00204818	TRUE	0.0180141	No
orf19.1658	12093	7808	10356	12868	11833	10175	11442	7319	10849	9940	10595	10611	10120	9709	10210	10323	10294.6	10499	10090	0.961	-0.058	-1.517	0.12915	0.189925	0.000911931	0.00212054	0.00130354	0.00130354	TRUE	0.0153824	No
orf19.1659	668	622	656	902	661	751	795	477	599	792	671	744	565	717	709	673	683.77	702	666	0.95	-0.074	-0.738	0.460285	0.545981	0.0118409	0.00410261	0.00812267	0.00812267	TRUE	0.127686	No
orf19.166	2269	1934	2244	2673	2737	3004	3160	1966	2036	2462	2296	2204	2341	2866	2820	2773	2474.68	2250	2700	1.201	0.264	3.49	0.000482896	0.00131041	0.00662541	0.00256614	0.00508313	0.00508313	TRUE	0.0989457	No
orf19.1661	4864	3355	4267	5250	5015	4533	4883	2904	4364	4271	4366	4329	4289	4325	4357	4096	4299.61	4332	4267	0.986	-0.021	-0.623	0.533451	0.616026	0.000119794	0.00231716	0.000840742	0.000840742	TRUE	0.00813094	No
orf19.1662	2711	2119	2400	2970	3147	2860	3085	1904	2432	2698	2455	2449	2691	2729	2753	2685	2611.61	2508	2714	1.084	0.116	2.654	0.00794341	0.0164	0.00082881	0.00253539	0.0014574	0.0014574	TRUE	0.0295455	No
orf19.1663	2034	1643	1913	2233	2194	2211	2411	1324	1825	2092	1957	1841	1876	2110	2151	1867	1964.98	1929	2001	1.04	0.056	0.855	0.392775	0.481585	0.00407613	0.00271831	0.00362143	0.00362143	TRUE	0.0380059	No
orf19.1664	292	225	238	303	363	326	298	238	262	286	243	250	310	311	266	336	283.11	260	306	1.173	0.23	2.374	0.0176013	0.0331708	0.00343236	0.00710726	0.00542337	0.00542337	TRUE	0.0894969	No
orf19.1665	10043	7458	9224	11135	9438	8913	9468	6098	9010	9495	9437	9182	8072	8505	8449	8601	8843.63	9281	8407	0.906	-0.143	-4.147	3.37322e-05	0.000112403	0.000526075	0.00214367	0.00102644	0.00102644	TRUE	0.0088892	No
orf19.1666	1280	769	1119	1388	1296	1056	1256	859	1148	979	1145	1145	1108	1008	1121	1212	1108.13	1104	1112	1.004	0.005	0.072	0.942876	0.958835	0.0046257	0.00328957	0.00400726	0.00400726	TRUE	0.0658177	No
orf19.1667	813	586	777	933	1016	989	1066	598	729	746	795	769	869	944	951	843	830.87	760	902	1.189	0.25	4.062	4.86512e-05	0.000157827	0.00127302	0.00372673	0.0024177	0.0024177	TRUE	0.0196717	No
orf19.1667.1	484	350	390	513	599	476	474	244	434	446	399	423	512	454	423	344	429.42	426	433	1.025	0.036	0.337	0.735921	0.793648	0.0115069	0.0053601	0.00834434	0.00834434	TRUE	0.199365	No
orf19.1668	627	443	591	706	849	814	861	534	562	564	605	582	726	777	768	753	667.19	578	756	1.307	0.386	6.474	9.55995e-11	7.00441e-10	1e-08	0.00415536	0.0018886	0.0018886	TRUE	0.0105603	No
orf19.1669	5172	3578	4528	5554	6266	5727	6336	3908	4640	4555	4633	4580	5359	5465	5654	5512	5049.58	4602	5498	1.194	0.256	8.114	4.88506e-16	6.17883e-15	0.000148931	0.00226701	0.000756565	0.000756565	TRUE	0.00470862	No
orf19.1670	946	759	941	1104	1433	1482	1608	860	849	966	963	910	1226	1414	1435	1213	1121.94	922	1322	1.437	0.523	7.121	1.07397e-12	9.825e-12	0.00505518	0.00327345	0.00426195	0.00426195	TRUE	0.0399388	No
orf19.1671	8071	5983	7482	9093	8775	8378	8615	5593	7241	7617	7655	7498	7505	7994	7687	7888	7635.64	7503	7768	1.035	0.05	1.428	0.153347	0.219778	0.000526653	0.00216964	0.00105384	0.00105384	TRUE	0.00680656	No
orf19.1671.1	7	6	7	10	10	7	4	2	6	8	7	8	9	7	4	3	6.37	7	6	0.761	-0.393	-0.722	0.47042	NA	1e-08	0.22993	0.12806	0.12806	TRUE	0.380021	No
orf19.1672	3161	2618	3014	3492	3731	3582	3875	2278	2836	3333	3084	2880	3191	3418	3458	3213	3176.41	3033	3320	1.096	0.132	2.279	0.0226547	0.0417641	0.00324536	0.00243655	0.002922	0.002922	TRUE	0.0526689	No
orf19.1673	2577	2188	2321	2886	2705	2787	2733	1535	2312	2786	2375	2380	2313	2659	2439	2165	2428.53	2463	2394	0.974	-0.039	-0.513	0.608276	0.683216	0.00642243	0.00257729	0.00501355	0.00501355	TRUE	0.0923882	No
orf19.1674	2244	1831	2067	2621	2799	2830	2917	1787	2013	2331	2115	2161	2394	2700	2603	2520	2354.71	2155	2554	1.187	0.247	4.344	1.39644e-05	4.9732e-05	0.00261649	0.00259603	0.00266697	0.00266697	TRUE	0.0351295	No
orf19.1675	1957	1319	1673	2007	1765	1510	1707	989	1756	1679	1712	1655	1509	1441	1523	1395	1583.74	1700	1467	0.864	-0.21	-4.478	7.54088e-06	2.80357e-05	0.000466761	0.00289615	0.00147804	0.00147804	TRUE	0.0117361	No
orf19.1676	1444	1171	1336	1648	1555	1546	1587	953	1295	1491	1367	1359	1330	1475	1416	1344	1384.67	1378	1391	1.012	0.017	0.296	0.766913	0.818404	0.0020945	0.00302793	0.00249511	0.00249511	TRUE	0.0344357	No
orf19.1677	2217	1649	2158	2388	2522	2048	2404	1529	1989	2099	2208	1969	2157	1954	2145	2157	2084.75	2066	2103	1.018	0.026	0.483	0.628874	0.700451	0.00212104	0.00267587	0.00234071	0.00234071	TRUE	0.0278858	No
orf19.1678	1112	806	1000	1190	1147	972	1070	713	998	1026	1023	981	981	927	955	1006	987.11	1007	967	0.96	-0.059	-1.152	0.249406	0.33153	1e-08	0.00345017	0.00149511	0.00149511	TRUE	0.00883798	No
orf19.1679	44	45	52	65	64	39	51	37	39	57	53	54	55	37	46	52	49.15	51	48	0.934	-0.099	-0.471	0.637371	0.708086	1e-08	0.0315153	0.021831	0.021831	TRUE	0.201671	No
orf19.168	6211	4158	5060	6645	6503	5851	6045	3561	5572	5294	5177	5480	5562	5583	5394	5022	5385.37	5381	5390	1.002	0.003	0.074	0.940665	0.957267	0.00127609	0.00224909	0.0017581	0.0017581	TRUE	0.0247361	No
orf19.1680	1873	1258	1706	1924	2017	1821	1929	1198	1680	1602	1745	1587	1725	1738	1721	1690	1685.92	1654	1718	1.04	0.056	1.227	0.219736	0.298546	0.000451427	0.0028406	0.00142277	0.00142277	TRUE	0.0166546	No
orf19.1681	293	186	254	282	241	264	267	191	263	237	260	233	206	252	238	269	244.71	248	241	0.967	-0.049	-0.471	0.637809	0.708289	0.00417978	0.00791176	0.00619859	0.00619859	TRUE	0.112693	No
orf19.1682	5884	3799	4910	6196	5701	4614	5189	3426	5279	4837	5023	5109	4876	4403	4630	4832	4873.55	5062	4685	0.925	-0.113	-2.47	0.0134963	0.0262753	0.00145474	0.0022774	0.00178998	0.00178998	TRUE	0.0201842	No
orf19.1683	1938	1257	1716	2021	1890	1694	1851	1167	1739	1600	1756	1667	1616	1616	1652	1646	1661.43	1690	1632	0.965	-0.052	-1.152	0.24942	0.33153	0.000259659	0.00285329	0.0013473	0.0013473	TRUE	0.0140102	No
orf19.1684	452	351	458	563	701	669	754	486	405	447	469	464	600	638	673	685	547.67	446	649	1.452	0.538	7.242	4.43608e-13	4.27115e-12	0.00220851	0.00463023	0.00339929	0.00339929	TRUE	0.0468902	No
orf19.1685	343	291	313	418	433	383	435	301	308	370	320	345	370	365	388	425	361.44	336	387	1.152	0.204	2.368	0.0178728	0.0336192	0.00210604	0.00599591	0.00430315	0.00430315	TRUE	0.0482635	No
orf19.1686	677	412	592	709	680	586	735	387	607	525	606	585	582	559	656	546	583.07	581	586	1.009	0.013	0.168	0.866819	0.898227	0.00378604	0.00446927	0.00412243	0.00412243	TRUE	0.0780225	No
orf19.1687	15381	10654	13527	16755	13647	12223	13389	8458	13798	13564	13839	13816	11671	11663	11947	11929	12778.6	13754	11802	0.858	-0.221	-8.849	8.80669e-19	1.44961e-17	2.68442e-05	0.00209313	0.000520961	0.000520961	TRUE	0.00103088	No
orf19.169	1649	1554	1556	2068	1686	1865	1977	1049	1479	1978	1592	1705	1442	1780	1764	1480	1652.51	1688	1616	0.959	-0.061	-0.633	0.526458	0.609551	0.0122293	0.00285801	0.00833457	0.00833457	TRUE	0.157737	No
orf19.1690	2921	1981	2598	3155	3664	3064	3341	2157	2620	2522	2658	2602	3134	2924	2981	3042	2810.35	2600	3020	1.161	0.215	5.502	3.7651e-08	1.93836e-07	0.000358591	0.00249608	0.00110849	0.00110849	TRUE	0.00828875	No
orf19.1691	290	203	224	294	406	373	376	268	260	258	229	242	347	356	336	378	300.86	247	354	1.427	0.513	5.995	2.03621e-09	1.23822e-08	1e-08	0.00680476	0.00360405	0.00360405	TRUE	0.026319	No
orf19.1693	774	544	694	783	815	737	821	488	694	693	710	646	697	703	733	688	695.47	686	705	1.031	0.044	0.746	0.45581	0.541527	1e-08	0.00406689	0.00195906	0.00195906	TRUE	0.0199078	No
orf19.1697	3086	2064	2528	3198	3724	3316	3435	2043	2768	2628	2586	2637	3185	3164	3065	2881	2864.4	2655	3074	1.159	0.213	4.732	2.22402e-06	8.97377e-06	0.000987963	0.00248633	0.00158981	0.00158981	TRUE	0.0201383	No
orf19.1698	720	586	703	832	764	671	776	508	646	746	719	686	653	640	692	716	687.48	699	675	0.966	-0.049	-0.738	0.460471	0.546093	0.00167445	0.00409114	0.0028508	0.0028508	TRUE	0.0312771	No
orf19.1699	696	505	618	811	870	882	891	563	624	643	632	669	744	842	795	794	717.89	642	794	1.235	0.304	4.941	7.7783e-07	3.34039e-06	1e-08	0.00400171	0.00223208	0.00223208	TRUE	0.0229127	No
orf19.17	694	724	706	1008	738	850	827	469	623	922	722	831	631	811	738	661	742.44	774	710	0.919	-0.122	-1.044	0.296305	0.381362	0.0187467	0.00393485	0.0116754	0.0116754	TRUE	0.208849	No
orf19.1700	10997	8408	9594	11924	10363	9784	9502	6754	9865	10704	9816	9833	8863	9336	8479	9526	9552.65	10054	9051	0.9	-0.152	-3.139	0.0016959	0.00406097	0.00215178	0.00213149	0.00214327	0.00214327	TRUE	0.0228651	No
orf19.1701	1485	1089	1275	1608	1628	1564	1584	1105	1332	1386	1304	1326	1392	1492	1413	1559	1400.7	1337	1464	1.093	0.128	2.516	0.011854	0.0234195	0.000740689	0.00301593	0.00178505	0.00178505	TRUE	0.0205678	No
orf19.1702	1235	887	1031	1362	1072	969	942	687	1108	1129	1055	1123	917	925	841	969	1008.25	1104	913	0.825	-0.278	-4.857	1.18976e-06	4.97083e-06	0.00101493	0.00341934	0.00213403	0.00213403	TRUE	0.0342212	No
orf19.1704	9692	6747	8362	10334	6422	5352	5903	3504	8695	8590	8555	8522	5492	5107	5267	4942	6896.2	8590	5202	0.606	-0.722	-18.824	4.82631e-79	1.31802e-76	0.000849719	0.00219003	0.0012582	0.0012582	TRUE	0.0172395	No
orf19.1706	357	391	348	386	324	414	398	245	320	498	356	318	277	395	355	346	358.15	373	343	0.923	-0.116	-0.781	0.434787	0.521918	0.0312673	0.00603284	0.0181871	0.0181871	TRUE	0.557905	No
orf19.1707	12	39	25	29	20	48	34	12	11	50	26	24	17	46	30	17	27.51	28	28	1.024	0.035	0.079	0.936872	0.954183	0.249843	0.0547503	0.145679	0.145679	TRUE	0.562339	No
orf19.1708	3003	2564	2720	3702	3571	3682	3816	2282	2694	3264	2783	3053	3054	3513	3405	3219	3123.1	2948	3298	1.119	0.162	2.379	0.0173367	0.0327854	0.00535411	0.00244435	0.00415457	0.00415457	TRUE	0.0616875	No
orf19.1709	2797	1790	2152	2726	1862	1714	1679	921	2509	2279	2202	2248	1592	1635	1498	1299	1907.85	2310	1506	0.653	-0.614	-8.46	2.6678e-17	3.87153e-16	0.00595814	0.00274043	0.00450231	0.00450231	TRUE	0.0974377	No
orf19.171	53864	37492	49232	60597	49630	46105	49665	30828	48322	47731	50369	49969	42445	43992	44318	43480	46328.3	49098	43559	0.887	-0.173	-5.682	1.33189e-08	7.24821e-08	0.000482677	0.00201086	0.000866451	0.000866451	TRUE	0.00427117	No
orf19.1710	1763	1489	1604	2120	1819	1910	1883	1190	1582	1896	1641	1748	1556	1822	1680	1678	1700.41	1717	1684	0.982	-0.026	-0.386	0.699351	0.761454	0.00466005	0.00283326	0.00387353	0.00387353	TRUE	0.0572219	No
orf19.1711	1208	1065	1202	1476	1458	1620	1653	803	1084	1356	1230	1217	1247	1546	1475	1133	1285.84	1222	1350	1.108	0.148	1.498	0.134246	0.196484	0.0133351	0.00310851	0.00854088	0.00854088	TRUE	0.135612	No
orf19.1712	839	783	804	1044	929	1013	967	658	753	997	823	861	795	967	863	928	873.12	858	888	1.036	0.05	0.558	0.576659	0.654804	0.00939732	0.00364217	0.00666902	0.00666902	TRUE	0.134605	No
orf19.1714	112	86	105	102	96	125	114	111	100	109	107	84	82	119	102	157	107.64	100	115	1.135	0.183	0.976	0.329048	0.416456	0.0342195	0.0154656	0.0241741	0.0241741	TRUE	0.368056	No
orf19.1715	680	458	634	708	740	715	814	515	610	583	649	584	633	682	726	726	649.18	606	692	1.139	0.187	2.707	0.00679437	0.0142381	0.00197617	0.00421574	0.00304031	0.00304031	TRUE	0.0409801	No
orf19.1716	2358	1516	1906	2450	2608	2200	2285	1392	2115	1930	1950	2020	2230	2099	2039	1963	2043.45	2004	2083	1.04	0.057	1.078	0.281197	0.365125	0.00169112	0.00268994	0.00216014	0.00216014	TRUE	0.0277922	No
orf19.1717	122	110	139	179	166	177	184	134	109	140	142	148	142	169	164	189	150.42	135	166	1.225	0.293	2.185	0.0288803	0.0518104	0.00903368	0.0116306	0.010468	0.010468	TRUE	0.178624	No
orf19.1718	778	726	813	988	898	982	1004	584	698	924	832	815	768	937	896	824	836.66	817	856	1.05	0.071	0.78	0.435479	0.522435	0.00928073	0.00371463	0.00664835	0.00664835	TRUE	0.115548	No
orf19.1719	2889	2349	2683	3375	2259	2591	2404	1616	2592	2991	2745	2783	1932	2472	2145	2279	2492.36	2778	2207	0.795	-0.332	-4.472	7.75072e-06	2.87624e-05	0.0065116	0.00256198	0.00487897	0.00487897	TRUE	0.0868664	No
orf19.172	4919	3896	4339	5426	4746	4901	4703	3027	4413	4960	4439	4474	4059	4676	4197	4269	4435.96	4572	4300	0.941	-0.088	-1.549	0.121454	0.18026	0.00322367	0.00230678	0.00284617	0.00284617	TRUE	0.0427066	No
orf19.1720	4760	3956	4543	5743	4388	4671	4879	2981	4270	5036	4648	4736	3753	4457	4354	4204	4432.26	4672	4192	0.897	-0.156	-2.395	0.0166071	0.0315545	0.00472475	0.00230705	0.00386057	0.00386057	TRUE	0.0615443	No
orf19.1721	24123	19277	21562	26774	21670	22389	22725	13009	21641	24542	22060	22078	18533	21363	20278	18348	21105.3	22580	19630	0.87	-0.202	-3.361	0.000777166	0.00200138	0.00436532	0.00204831	0.00341182	0.00341182	TRUE	0.043188	No
orf19.1722	55	41	56	79	72	48	54	55	49	52	57	65	62	46	48	78	57.14	56	58	1.022	0.031	0.152	0.879463	0.908496	0.0183255	0.027386	0.0236151	0.0236151	TRUE	0.329095	No
orf19.1723	1567	1042	1287	1695	1457	1343	1434	965	1406	1327	1317	1398	1246	1281	1280	1361	1326.87	1362	1292	0.946	-0.081	-1.633	0.102389	0.155695	0.000433433	0.0030736	0.00158453	0.00158453	TRUE	0.0137624	No
orf19.1724	4	1	1	5	0	1	1	1	4	1	1	4	0	1	1	1	1.66	2	1	0.294	-1.765	-1.479	0.139193	NA	1e-08	0.877514	0.520398	0.520398	TRUE	0.162504	No
orf19.1725	1071	650	845	1029	1347	1075	1355	965	961	828	865	849	1152	1026	1209	1361	1031.16	876	1187	1.352	0.435	5.146	2.66286e-07	1.22688e-06	0.00780739	0.00338736	0.00587227	0.00587227	TRUE	0.110812	No
orf19.1727	15912	11842	14909	17721	14135	13832	14788	9072	14275	15076	15253	14613	12089	13198	13196	12795	13811.9	14804	12820	0.866	-0.208	-5.128	2.92714e-07	1.33838e-06	0.00118483	0.00208463	0.00150021	0.00150021	TRUE	0.018256	No
orf19.1728	685	535	595	730	509	500	543	328	615	681	609	602	435	477	485	463	545.74	627	465	0.744	-0.427	-6.104	1.03722e-09	6.58039e-09	0.000949656	0.0046396	0.00282216	0.00282216	TRUE	0.0366241	No
orf19.1729	911	875	843	1136	1054	1274	1251	700	817	1114	862	937	901	1216	1116	987	993.89	932	1055	1.133	0.181	1.666	0.0957261	0.147467	0.0170932	0.00344015	0.0102888	0.0102888	TRUE	0.198325	No
orf19.173	18751	13466	17175	20812	24307	22932	25099	15373	16822	17144	17572	17162	20788	21881	22397	21682	19430.8	17175	21687	1.263	0.337	10.209	1.81379e-24	4.46609e-23	0.000568734	0.00205423	0.000991556	0.000991556	TRUE	0.00964686	No
orf19.1730	869	570	798	942	1097	920	1021	584	780	726	816	777	938	878	911	824	831.16	775	888	1.148	0.199	3.232	0.00122893	0.00304472	0.00108979	0.00372613	0.00242776	0.00242776	TRUE	0.0247444	No
orf19.1734	2301	1825	2221	2653	2399	2498	2449	1590	2064	2323	2272	2188	2052	2384	2185	2243	2213.84	2212	2216	1.002	0.003	0.051	0.958939	0.97028	0.00284786	0.00263526	0.00276284	0.00276284	TRUE	0.0324386	No
orf19.1735	448	346	374	489	485	479	473	269	402	440	383	403	415	457	422	379	412.7	407	418	1.034	0.048	0.599	0.549057	0.630251	0.00143061	0.00549711	0.00368278	0.00368278	TRUE	0.0428268	No
orf19.1736	153	97	126	140	156	107	126	93	137	123	129	115	133	102	112	131	123.03	126	120	0.946	-0.081	-0.601	0.548033	0.629316	1e-08	0.0137793	0.00925236	0.00925236	TRUE	0.101138	No
orf19.1737	18	15	24	28	21	29	29	15	16	19	25	23	18	28	26	21	21.94	21	23	1.118	0.162	0.541	0.588551	0.66667	1e-08	0.0681341	0.0401948	0.0401948	TRUE	0.170073	No
orf19.1738	6344	4352	5418	6809	8865	7398	8135	4875	5691	5541	5543	5615	7582	7059	7259	6876	6395.65	5598	7194	1.286	0.363	9.459	3.12289e-21	6.13148e-20	0.000751999	0.00220651	0.00125239	0.00125239	TRUE	0.0161448	No
orf19.1738.1	391	227	251	368	374	318	299	180	351	289	257	303	320	303	267	254	293	300	286	0.955	-0.067	-0.59	0.555159	0.635409	0.0108298	0.00693417	0.00883722	0.00883722	TRUE	0.150324	No
orf19.1741	3	12	4	6	3	4	8	1	3	15	4	5	3	4	7	1	5.24	7	4	0.592	-0.758	-1.046	0.295448	NA	0.317829	0.278889	0.29656	0.29656	TRUE	1.47548	No
orf19.1742	6585	5767	6392	8832	6501	7783	6691	4831	5907	7342	6540	7283	5560	7426	5971	6814	6605.31	6768	6443	0.952	-0.071	-0.768	0.442639	0.529384	0.0119824	0.0021993	0.00812082	0.00812082	TRUE	0.129735	No
orf19.1743	4548	3148	4108	4887	3455	2959	3085	1981	4080	4008	4203	4030	2955	2823	2753	2794	3455.7	4080	2831	0.694	-0.527	-13.853	1.217e-43	9.1397e-42	0.000407218	0.00239961	0.00108634	0.00108634	TRUE	0.0109648	No
orf19.1744	2276	2081	2116	2649	2570	2766	2846	1631	2042	2649	2165	2184	2198	2639	2540	2300	2339.69	2260	2419	1.072	0.1	1.182	0.237071	0.317929	0.00975911	0.00259999	0.00643434	0.00643434	TRUE	0.16002	No
orf19.1745	623	438	545	700	726	749	774	524	559	558	558	577	621	715	691	739	627.08	563	692	1.224	0.291	4.245	2.18415e-05	7.53728e-05	0.00165799	0.00429455	0.00289923	0.00289923	TRUE	0.0577536	No
orf19.1746	109	82	102	118	96	96	109	69	98	104	104	97	82	92	97	97	96.52	101	92	0.91	-0.135	-0.97	0.332139	0.418957	1e-08	0.0170206	0.00832087	0.00832087	TRUE	0.0571122	No
orf19.1747	98	63	117	136	102	102	93	57	88	80	120	112	87	97	83	80	93.49	100	87	0.868	-0.205	-1.26	0.2076	0.283856	0.0107457	0.0175076	0.0146139	0.0146139	TRUE	0.14062	No
orf19.1748	405	270	359	423	168	151	173	126	363	344	367	349	144	144	154	178	255.38	356	155	0.431	-1.214	-12.665	9.26471e-37	5.15393e-35	1e-08	0.00766407	0.00417129	0.00417129	TRUE	0.0794407	No
orf19.175	137	122	135	186	167	166	203	105	123	155	138	153	143	158	181	148	150.02	142	158	1.112	0.153	1.202	0.229548	0.309588	0.00557497	0.0116562	0.00892109	0.00892109	TRUE	0.113539	No
orf19.1750	18722	14091	17131	22424	23658	22443	24658	14735	16796	17939	17527	18491	20233	21414	22003	20782	19398.2	17688	21108	1.193	0.255	6.09	1.12763e-09	7.11636e-09	0.00140693	0.00205436	0.00163307	0.00163307	TRUE	0.0142099	No
orf19.1751	11990	8949	10856	13294	12327	12083	12800	8129	10756	11393	11107	10962	10542	11529	11422	11465	11147.1	11054	11240	1.017	0.024	0.605	0.545026	0.626462	0.000986415	0.00210975	0.0014104	0.0014104	TRUE	0.0215649	No
orf19.1753	7901	6132	7186	9027	8119	7681	8093	4812	7088	7807	7352	7444	6944	7329	7222	6787	7246.45	7423	7070	0.953	-0.069	-1.643	0.100291	0.153126	0.00123799	0.00217986	0.00156033	0.00156033	TRUE	0.0145031	No
orf19.1754	2186	1612	1983	2389	1930	1775	1772	1146	1961	2052	2029	1970	1651	1694	1581	1616	1819.24	2003	1636	0.817	-0.291	-6.822	8.98474e-12	7.38445e-11	1e-08	0.00277749	0.00118778	0.00118778	TRUE	0.00704355	No
orf19.1755	2209	1723	1977	2572	3383	3287	3501	2094	1982	2194	2023	2121	2893	3136	3124	2953	2553.24	2080	3026	1.457	0.543	11.16	6.41103e-29	2.18849e-27	0.00133252	0.0025481	0.00186549	0.00186549	TRUE	0.0154316	No
orf19.1756	6708	5000	6087	7477	7614	7039	7851	4780	6018	6366	6228	6166	6512	6716	7006	6742	6469.02	6194	6744	1.089	0.123	3.442	0.00057685	0.00153215	0.000516144	0.00220393	0.00107367	0.00107367	TRUE	0.00858228	No
orf19.1757	3852	2813	3402	4315	3194	3068	3278	1939	3456	3581	3481	3558	2732	2927	2925	2735	3174.32	3519	2830	0.805	-0.313	-7.799	6.26275e-15	7.16697e-14	0.000497415	0.00243685	0.00122784	0.00122784	TRUE	0.00733377	No
orf19.1759	2452	1857	2194	2684	2705	2442	2502	1677	2200	2364	2245	2213	2313	2330	2233	2365	2282.89	2256	2310	1.025	0.035	0.852	0.394077	0.482731	0.000262235	0.00261543	0.00120851	0.00120851	TRUE	0.0119293	No
orf19.176	1754	1291	1613	2103	2920	2632	2665	1796	1574	1644	1650	1734	2497	2511	2378	2533	2065.17	1650	2480	1.501	0.586	12.864	7.18199e-38	4.403e-36	0.000741141	0.00268247	0.00148758	0.00148758	TRUE	0.0151616	No
orf19.1760	9562	7082	8334	10332	11030	10671	11070	7002	8578	9016	8527	8520	9433	10182	9878	9876	9251.2	8660	9842	1.137	0.185	5.066	4.06589e-07	1.8257e-06	0.000725811	0.00213644	0.00117028	0.00117028	TRUE	0.00974507	No
orf19.1761	269	189	218	269	273	300	253	169	241	241	223	222	233	286	226	238	238.83	232	246	1.063	0.088	0.86	0.389579	0.478453	0.00350046	0.0080579	0.00591288	0.00591288	TRUE	0.14087	No
orf19.1762	1458	1135	1270	1746	1517	1333	1568	882	1308	1445	1299	1440	1297	1272	1399	1244	1338.06	1373	1303	0.951	-0.073	-1.23	0.218876	0.297581	0.00205635	0.00306445	0.00261585	0.00261585	TRUE	0.0299526	No
orf19.1763	1328	1043	1294	1554	1395	1483	1516	938	1191	1328	1324	1281	1193	1415	1353	1323	1301.05	1281	1321	1.032	0.045	0.701	0.483399	0.568794	0.00318502	0.00309532	0.00314695	0.00314695	TRUE	0.0536593	No
orf19.1764	4492	3780	4113	5315	5674	5573	5979	3800	4030	4812	4208	4383	4853	5318	5335	5360	4787.24	4358	5216	1.197	0.26	4.375	1.21225e-05	4.35338e-05	0.00376412	0.00228277	0.00317259	0.00317259	TRUE	0.0588142	No
orf19.1765	1154	957	1090	1311	880	822	921	461	1035	1218	1115	1081	753	784	822	650	932.35	1112	752	0.68	-0.557	-7.2	6.01173e-13	5.67009e-12	0.00575803	0.00353655	0.00463085	0.00463085	TRUE	0.089102	No
orf19.1766	136	116	142	161	138	136	127	69	122	148	145	133	118	130	113	97	125.77	137	114	0.847	-0.239	-1.821	0.0685354	0.110778	1e-08	0.013522	0.00861341	0.00861341	TRUE	0.0785612	No
orf19.1767	426	416	382	515	485	622	652	350	382	530	391	425	415	593	582	494	476.38	432	521	1.21	0.275	2.133	0.032921	0.0581616	0.0223619	0.00502691	0.0138117	0.0138117	TRUE	0.256078	No
orf19.1768	268	236	264	318	293	334	368	219	240	300	270	262	251	319	328	309	284.97	268	302	1.127	0.172	1.591	0.111643	0.167395	0.00830841	0.0070738	0.00767731	0.00767731	TRUE	0.158766	No
orf19.1769	907	744	749	1027	886	852	915	507	814	947	766	847	758	813	816	715	809.54	844	776	0.923	-0.116	-1.546	0.122021	0.180968	0.00442883	0.00377277	0.00412638	0.00412638	TRUE	0.0757929	No
orf19.177	451	353	453	508	496	532	509	372	405	449	463	419	424	508	454	525	455.88	434	478	1.098	0.135	1.567	0.117136	0.174543	0.00462419	0.00516391	0.00489239	0.00489239	TRUE	0.0676063	No
orf19.1770	7538	5286	6108	7975	8255	6835	6983	4786	6762	6730	6249	6576	7060	6522	6231	6750	6610.06	6579	6641	1.009	0.013	0.281	0.778767	0.826503	0.00161947	0.00219914	0.00201278	0.00201278	TRUE	0.0225688	No
orf19.1771	1412	1202	1252	1579	1740	1803	1813	1138	1267	1530	1281	1302	1488	1720	1618	1605	1476.41	1345	1608	1.197	0.26	3.686	0.000228031	0.000657393	0.00511269	0.00296279	0.00408471	0.00408471	TRUE	0.0991127	No
orf19.1772	2984	2649	2791	3611	3054	3485	3620	2194	2677	3372	2855	2978	2612	3325	3230	3094	3018.05	2970	3065	1.032	0.046	0.539	0.589719	0.667485	0.0101233	0.00246053	0.00661277	0.00661277	TRUE	0.122163	No
orf19.1773	2405	1800	2227	2839	2507	2391	2437	1586	2158	2292	2278	2341	2144	2281	2175	2237	2238.21	2267	2209	0.974	-0.038	-0.874	0.381883	0.470995	0.000627792	0.00262812	0.00136382	0.00136382	TRUE	0.0133454	No
orf19.1774	510	396	463	580	501	499	472	343	458	504	474	478	428	476	421	484	465.4	478	452	0.944	-0.084	-1.128	0.259502	0.342882	0.000999285	0.00509878	0.00314796	0.00314796	TRUE	0.0245491	No
orf19.1776	392	393	390	502	311	305	334	188	352	500	399	414	266	291	298	265	348.14	416	280	0.677	-0.564	-5.236	1.6419e-07	7.8104e-07	0.010103	0.00614935	0.00813076	0.00813076	TRUE	0.199501	No
orf19.1777	8203	6785	7748	9499	11727	12362	12818	7314	7359	8638	7927	7833	10029	11795	11438	10316	9416.92	7939	10894	1.373	0.457	7.057	1.70568e-12	1.52043e-11	0.00514257	0.00213368	0.00392115	0.00392115	TRUE	0.0425509	No
orf19.1778	124	98	103	132	93	97	84	58	111	125	105	109	80	93	75	82	97.39	112	82	0.733	-0.449	-3.151	0.00162819	0.00391286	1e-08	0.0168863	0.00899366	0.00899366	TRUE	0.0728858	No
orf19.1779	17106	11834	15853	19831	20322	17443	19167	13593	15346	15066	16219	16353	17380	16644	17103	19172	16660.3	15746	17575	1.116	0.158	3.091	0.00199205	0.00470448	0.00272074	0.00206666	0.00244945	0.00244945	TRUE	0.0454001	No
orf19.178	950	815	833	1090	959	1077	1094	670	852	1038	852	899	820	1028	976	945	926.24	910	942	1.037	0.052	0.608	0.543043	0.625259	0.00787418	0.00354683	0.00585775	0.00585775	TRUE	0.100813	No
orf19.1780	50	40	44	67	24	34	47	27	45	51	45	55	21	32	42	38	41.13	49	33	0.671	-0.575	-2.38	0.0173216	0.0327758	0.0205652	0.0372757	0.0307788	0.0307788	TRUE	0.544498	No
orf19.1782	668	388	501	654	535	472	474	352	599	494	513	539	458	450	423	496	496.56	536	457	0.847	-0.24	-2.962	0.00305652	0.00692704	0.00364156	0.00490306	0.00426937	0.00426937	TRUE	0.0736605	No
orf19.1782.1	34	17	29	28	26	19	29	10	31	22	30	23	22	18	26	14	23.16	26	20	0.778	-0.362	-1.233	0.217744	0.296295	1e-08	0.0646709	0.0395939	0.0395939	TRUE	0.204842	No
orf19.1783	12391	9395	11549	13486	12123	12235	12792	7193	11116	11961	11816	11121	10368	11674	11415	10145	11201.9	11504	10900	0.948	-0.077	-1.428	0.153292	0.219752	0.00304967	0.00210912	0.00270882	0.00270882	TRUE	0.027838	No
orf19.1785	19602	13978	16982	21486	29607	27220	29944	20314	17585	17795	17374	17718	25321	25972	26720	28651	22142.1	17618	26666	1.513	0.598	14.281	2.85829e-46	2.41868e-44	0.00145302	0.00204509	0.0016351	0.0016351	TRUE	0.0304981	No
orf19.1789	202	201	193	237	273	394	338	182	181	256	197	195	233	376	302	257	249.72	207	292	1.415	0.501	3.252	0.00114591	0.00284961	0.0302935	0.00779294	0.0186085	0.0186085	TRUE	0.427706	No
orf19.1789.1	1711	1192	1484	1882	1763	1697	1743	1186	1535	1518	1518	1552	1508	1619	1555	1673	1559.72	1531	1589	1.035	0.05	1.072	0.283773	0.367993	0.000414439	0.00291027	0.00144852	0.00144852	TRUE	0.0142537	No
orf19.1791	7050	5777	6324	8158	6886	6867	7214	4031	6325	7355	6470	6727	5889	6552	6437	5685	6430.08	6719	6141	0.915	-0.129	-2.086	0.037021	0.0645638	0.00442092	0.00220529	0.00350895	0.00350895	TRUE	0.0489372	No
orf19.1792	427	356	374	487	488	513	583	320	383	453	383	402	417	489	520	451	437.36	405	469	1.163	0.218	2.427	0.0152194	0.0292135	0.00561632	0.00529872	0.00545918	0.00545918	TRUE	0.0719638	No
orf19.1793	1352	1024	1263	1634	1556	1416	1537	927	1213	1304	1292	1347	1331	1351	1372	1307	1314.62	1289	1340	1.041	0.057	1.161	0.24547	0.327421	0.000517471	0.0030838	0.0015911	0.0015911	TRUE	0.0200951	No
orf19.1794	111	113	116	139	183	200	175	83	100	144	119	115	157	191	156	117	137.16	120	155	1.319	0.4	2.522	0.01167	0.0231016	0.0218948	0.0125633	0.0167161	0.0167161	TRUE	0.195094	No
orf19.1795	1778	1370	1474	1975	2354	2365	2381	1364	1595	1744	1508	1629	2013	2257	2125	1924	1849.27	1619	2080	1.287	0.364	5.82	5.88103e-09	3.37471e-08	0.00347986	0.00276454	0.00319956	0.00319956	TRUE	0.0393715	No
orf19.1795.1	262	208	215	329	268	266	270	184	235	265	220	271	229	254	241	260	246.82	248	246	0.989	-0.016	-0.158	0.87472	0.904219	0.00251126	0.00786112	0.00543185	0.00543185	TRUE	0.0619062	No
orf19.1796	247	203	276	305	269	268	293	153	222	258	282	252	230	256	261	216	247.12	254	241	0.956	-0.065	-0.624	0.532863	0.615543	0.00482977	0.00785409	0.00646233	0.00646233	TRUE	0.0835277	No
orf19.1797	7515	6248	6816	8805	6377	6646	6891	4306	6742	7954	6973	7261	5454	6341	6149	6073	6618.47	7232	6004	0.83	-0.268	-4.29	1.7836e-05	6.24695e-05	0.00448591	0.00219886	0.00360191	0.00360191	TRUE	0.0545483	No
orf19.1798	590	463	578	668	724	759	839	463	529	589	591	551	619	724	749	653	625.75	565	686	1.218	0.284	3.658	0.000254638	0.000728159	0.00405457	0.00429945	0.00416878	0.00416878	TRUE	0.0563486	No
orf19.1799	13238	8916	11631	14386	15248	13446	14503	8524	11876	11351	11900	11863	13041	12830	12942	12022	12228	11748	12709	1.082	0.114	3.105	0.00190384	0.00451393	0.000815437	0.00209824	0.00120795	0.00120795	TRUE	0.0157752	No
orf19.18	33111	23368	28911	36072	32285	27614	28971	18080	29704	29750	29579	29745	27611	26348	25852	25500	28011.2	29694	26328	0.887	-0.173	-5.405	6.49375e-08	3.26217e-07	0.000571114	0.00203135	0.000952247	0.000952247	TRUE	0.0132348	No
orf19.1800	10817	7987	9821	12593	10424	9833	10849	6225	9704	10168	10048	10384	8915	9382	9681	8780	9632.81	10076	9190	0.912	-0.132	-3.16	0.0015757	0.00380345	0.00128994	0.00213023	0.00158083	0.00158083	TRUE	0.0158717	No
orf19.1801	1669	1291	1490	1860	1830	1796	1931	1080	1497	1644	1524	1534	1565	1714	1723	1523	1590.52	1550	1631	1.055	0.078	1.375	0.169101	0.238951	0.00198437	0.00289225	0.00242118	0.00242118	TRUE	0.0219067	No
orf19.1802	6740	5034	6030	7282	6960	6655	6950	3922	6046	6409	6169	6005	5952	6350	6202	5532	6083.15	6157	6009	0.977	-0.034	-0.698	0.485059	0.570524	0.00186931	0.00221817	0.00208262	0.00208262	TRUE	0.0337872	No
orf19.1803	153	119	150	192	163	192	163	130	137	151	153	158	139	183	145	183	156.49	150	162	1.077	0.107	0.837	0.402612	0.490956	0.00686618	0.0112559	0.00925845	0.00925845	TRUE	0.103633	No
orf19.1804	4748	3472	4025	5105	4051	3892	4245	2461	4259	4420	4118	4210	3465	3714	3788	3471	3930.55	4252	3610	0.85	-0.235	-5.325	1.00953e-07	4.95934e-07	0.0011624	0.00234886	0.00161266	0.00161266	TRUE	0.0136294	No
orf19.1805	3148	2453	2820	3559	3067	2917	3158	2082	2824	3123	2885	2935	2623	2783	2818	2936	2865.96	2942	2790	0.948	-0.077	-1.57	0.116416	0.173555	0.00157009	0.00248605	0.00194599	0.00194599	TRUE	0.0200387	No
orf19.1806	34	22	29	54	45	38	43	22	31	28	30	45	38	36	38	31	34.61	34	36	1.082	0.113	0.468	0.640136	0.710238	1e-08	0.0439283	0.0276635	0.0276635	TRUE	0.425791	No
orf19.1808	270	273	250	355	349	389	434	248	242	348	256	293	298	371	387	350	318.12	285	352	1.24	0.311	2.545	0.0109291	0.0218002	0.0155012	0.00654284	0.011104	0.011104	TRUE	0.229832	No
orf19.1813	3102	2155	2854	3464	3086	2757	2898	1770	2783	2744	2920	2856	2639	2631	2586	2496	2706.88	2826	2588	0.917	-0.126	-3.222	0.00127268	0.00313628	0.000210159	0.00251582	0.00109137	0.00109137	TRUE	0.00621976	No
orf19.1814	1886	1467	1810	2120	2185	2220	2239	1202	1692	1868	1852	1748	1869	2118	1998	1695	1854.97	1790	1920	1.075	0.104	1.518	0.128917	0.189697	0.00483688	0.00276212	0.00399495	0.00399495	TRUE	0.0711115	No
orf19.1815	13303	8899	11093	14215	12663	10467	10748	6838	11934	11329	11349	11722	10830	9987	9591	9644	10798.4	11584	10013	0.865	-0.21	-4.584	4.56372e-06	1.74753e-05	0.00183308	0.00211396	0.00192215	0.00192215	TRUE	0.0371368	No
orf19.1816	6759	4569	6213	7428	7074	6242	6875	4597	6064	5817	6357	6125	6050	5956	6135	6484	6123.3	6091	6156	1.01	0.014	0.34	0.733902	0.792039	0.00103528	0.0022166	0.00149555	0.00149555	TRUE	0.0150771	No
orf19.182	2301	1654	2072	2586	2718	2414	2571	1495	2064	2106	2120	2132	2325	2303	2294	2109	2181.61	2106	2258	1.074	0.103	2.383	0.0171954	0.0325694	0.000472136	0.00264495	0.00135009	0.00135009	TRUE	0.0216831	No
orf19.1821	0	0	0	1	0	0	2	1	0	0	0	1	0	0	2	1	0.5	0	1	2.585	1.37	0.647	0.517951	NA	1e-08	2.89116	2.66369	2.66369	TRUE	0.153062	No
orf19.1822	51	49	51	71	77	65	63	47	46	62	52	59	66	62	56	66	58.66	55	62	1.146	0.197	1.082	0.279071	0.363226	1e-08	0.0267293	0.0146529	0.0146529	TRUE	0.109565	No
orf19.1823	130	101	140	143	167	180	180	122	117	129	143	118	143	172	161	172	144.2	127	162	1.277	0.353	2.846	0.00442436	0.00966251	1e-08	0.0120466	0.00774485	0.00774485	TRUE	0.0825845	No
orf19.1824	0	1	0	0	0	1	0	0	0	1	0	0	0	1	0	0	0.28	0	0	1.016	0.023	0.008	0.993493	NA	1e-08	5.21625	5.64384	5.64384	TRUE	0.544438	No
orf19.1825	72	42	56	74	62	49	66	47	65	53	57	61	53	47	59	66	57.67	59	56	0.938	-0.093	-0.505	0.613252	0.686879	1e-08	0.0271532	0.0151727	0.0151727	TRUE	0.104959	No
orf19.1826	12658	10220	11652	14797	20168	20208	21038	13363	11356	13011	11921	12202	17248	19282	18773	18847	15330	12122	18538	1.529	0.613	11.907	1.0938e-32	4.62786e-31	0.00267314	0.00207422	0.00247757	0.00247757	TRUE	0.0295296	No
orf19.1827	12	23	27	24	17	18	17	8	11	29	28	20	15	17	15	11	18.2	22	14	0.683	-0.549	-1.502	0.133176	0.1952	0.0572952	0.081728	0.071334	0.071334	TRUE	0.506244	No
orf19.1828	391	317	416	455	453	400	462	226	351	404	426	375	387	382	412	319	381.91	389	375	0.972	-0.041	-0.433	0.664917	0.73286	0.0061134	0.00578072	0.00593781	0.00593781	TRUE	0.100975	No
orf19.183	1248	868	1041	1360	1367	1214	1175	803	1120	1105	1065	1121	1169	1158	1048	1133	1114.96	1103	1127	1.021	0.031	0.573	0.566873	0.646502	0.000752181	0.00328154	0.00184125	0.00184125	TRUE	0.0282001	No
orf19.1830	3527	2895	3150	3945	3333	3492	3543	2149	3164	3686	3223	3253	2850	3332	3162	3031	3212.57	3332	3094	0.929	-0.106	-1.668	0.0953855	0.147093	0.00432581	0.0024314	0.00354108	0.00354108	TRUE	0.0610096	No
orf19.1831	3	1	3	7	1	3	0	2	3	1	3	6	1	3	0	3	2.42	3	2	0.467	-1.1	-1.134	0.256733	NA	1e-08	0.602335	0.427412	0.427412	TRUE	0.48942	No
orf19.1832	2639	1925	2415	3027	2551	2236	2561	1485	2367	2451	2471	2496	2182	2134	2285	2094	2310	2446	2174	0.89	-0.169	-3.951	7.78321e-05	0.000241662	0.00053426	0.00260796	0.00131248	0.00131248	TRUE	0.0145281	No
orf19.1833	20418	15372	18066	22916	18265	17982	18976	10723	18317	19570	18483	18897	15621	17158	16933	15124	17512.8	18817	16209	0.862	-0.215	-4.455	8.39025e-06	3.10016e-05	0.00223364	0.00206242	0.00217644	0.00217644	TRUE	0.0245482	No
orf19.1834	260	182	241	330	299	341	385	227	233	232	247	272	256	325	344	320	278.55	246	311	1.26	0.334	3.056	0.00224217	0.00524162	0.00840791	0.00719107	0.00780195	0.00780195	TRUE	0.17613	No
orf19.1835	3922	3170	3647	4488	4228	4317	4578	2829	3518	4036	3731	3701	3616	4119	4085	3990	3849.56	3746	3952	1.055	0.078	1.372	0.170204	0.240326	0.00299929	0.00235663	0.00282847	0.00282847	TRUE	0.040834	No
orf19.1836	135	127	133	169	152	152	139	85	121	162	136	139	130	145	124	120	134.65	140	130	0.938	-0.092	-0.713	0.47578	0.561241	0.00272209	0.0127611	0.00855073	0.00855073	TRUE	0.101742	No
orf19.1837	5772	3971	4978	6209	5851	5002	5690	3193	5178	5056	5093	5120	5004	4773	5077	4503	4975.52	5112	4839	0.948	-0.078	-1.797	0.0722819	0.115898	0.00121335	0.00227129	0.0015884	0.0015884	TRUE	0.0254487	No
orf19.1839	14780	10511	13679	16069	13989	13377	14033	7808	13259	13382	13995	13251	11964	12764	12522	11012	12768.6	13472	12066	0.896	-0.158	-3.212	0.00131769	0.00323129	0.00231892	0.00209322	0.00225885	0.00225885	TRUE	0.041577	No
orf19.184	472	431	512	660	567	579	661	340	423	549	524	544	485	552	590	480	518.37	510	527	1.036	0.051	0.509	0.610707	0.685178	0.010414	0.00478003	0.00766201	0.00766201	TRUE	0.156904	No
orf19.1840	1354	985	1318	1494	2296	2068	2174	1340	1215	1254	1348	1232	1964	1973	1940	1890	1601.98	1262	1942	1.541	0.623	13.15	1.70609e-39	1.1264e-37	0.000409438	0.00288572	0.00150422	0.00150422	TRUE	0.0255378	No
orf19.1841	61	76	78	83	51	87	80	40	55	97	80	68	44	83	71	56	69.27	75	64	0.857	-0.222	-0.964	0.335184	0.421967	0.0523044	0.0229368	0.0364619	0.0364619	TRUE	0.297692	No
orf19.1842	3280	2611	3137	3707	3217	3298	3462	1969	2943	3324	3209	3057	2751	3147	3089	2777	3037.17	3133	2941	0.94	-0.09	-1.498	0.134122	0.196394	0.00344528	0.0024575	0.00310364	0.00310364	TRUE	0.0268366	No
orf19.1843	259	196	237	297	209	265	252	174	232	250	242	245	179	253	225	245	233.89	242	226	0.926	-0.11	-0.969	0.332636	0.419417	0.0080743	0.00818622	0.00812608	0.00812608	TRUE	0.230423	No
orf19.1844	15	7	17	19	11	17	16	13	13	9	17	16	9	16	14	18	14.21	14	14	1.018	0.026	0.069	0.945066	NA	1e-08	0.104149	0.0643937	0.0643937	TRUE	0.298703	No
orf19.1847	531	408	477	596	1025	872	1033	685	476	519	488	491	877	832	922	966	696.48	494	899	1.82	0.864	12.985	1.48582e-38	9.49658e-37	0.00142998	0.00406386	0.00268036	0.00268036	TRUE	0.0292731	No
orf19.1848.1	298	189	241	346	503	388	342	267	267	241	247	285	430	370	305	377	315.25	260	370	1.421	0.507	4.538	5.68773e-06	2.15188e-05	0.0107247	0.00658445	0.00869978	0.00869978	TRUE	0.171278	No
orf19.1849	4770	3718	4609	5598	5328	5114	5436	3209	4279	4733	4715	4616	4557	4880	4851	4526	4644.66	4586	4704	1.026	0.038	0.801	0.422854	0.510449	0.00154769	0.00229208	0.00188867	0.00188867	TRUE	0.0249357	No
orf19.185	2799	2001	2371	3000	3020	2755	2755	1614	2511	2547	2426	2474	2583	2629	2458	2276	2488.05	2490	2486	1.001	0.001	0.019	0.984461	0.988204	0.00149737	0.00256299	0.00204613	0.00204613	TRUE	0.0366197	No
orf19.1850	852	572	704	990	1002	908	981	601	764	728	720	816	857	866	875	848	809.44	757	862	1.136	0.183	3.122	0.0017989	0.0042905	0.000552873	0.00377298	0.00207556	0.00207556	TRUE	0.0343952	No
orf19.1852	1041	590	873	1030	1066	868	960	628	934	751	893	849	912	828	857	886	863.73	857	871	1.013	0.019	0.27	0.787105	0.833438	0.00377003	0.00366027	0.00371819	0.00371819	TRUE	0.0759207	No
orf19.1853	1175	751	876	1118	1338	1030	1032	648	1054	956	896	922	1144	983	921	914	973.78	957	990	1.036	0.052	0.625	0.532006	0.614671	0.00725101	0.0034703	0.00552644	0.00552644	TRUE	0.13345	No
orf19.1854	3497	2398	2762	3447	3489	3062	3215	2048	3137	3053	2826	2842	2984	2922	2869	2889	2940.16	2964	2916	0.984	-0.023	-0.506	0.61275	0.686718	0.00104519	0.00247327	0.00166607	0.00166607	TRUE	0.01948	No
orf19.1855	344	252	310	410	335	345	362	234	309	321	317	338	287	329	323	330	319.18	321	317	0.984	-0.023	-0.277	0.781854	0.828901	1e-08	0.00652776	0.00365345	0.00365345	TRUE	0.0521558	No
orf19.1856	2961	2067	2644	3213	2920	2761	2893	1716	2656	2632	2705	2649	2497	2634	2582	2420	2596.99	2660	2533	0.953	-0.069	-1.74	0.0818093	0.129073	0.000247734	0.00253852	0.00112709	0.00112709	TRUE	0.00981364	No
orf19.1857	893	577	720	977	763	661	773	439	801	735	737	806	653	631	690	619	708.77	770	648	0.842	-0.248	-3.888	0.000100976	0.000309206	0.00105445	0.00402772	0.00247933	0.00247933	TRUE	0.0223593	No
orf19.1860	5041	3084	4369	5495	5006	3788	4333	3096	4522	3926	4470	4531	4281	3614	3866	4367	4197.31	4362	4032	0.923	-0.115	-1.651	0.0986873	0.151176	0.00577607	0.00232539	0.0044081	0.0044081	TRUE	0.0592133	No
orf19.1860.1	178	122	174	194	233	242	235	137	160	155	178	160	199	231	210	193	185.76	163	208	1.279	0.355	3.319	0.000903945	0.00229249	1e-08	0.00979435	0.00554117	0.00554117	TRUE	0.0579464	No
orf19.1861	11259	8090	9974	12288	15241	13677	14933	9177	10100	10299	10204	10133	13035	13050	13325	12943	11636.3	10184	13088	1.286	0.362	14.474	1.78163e-47	1.57811e-45	3.7132e-07	0.00210428	0.000514544	0.000514544	TRUE	0.00183118	No
orf19.1862	4784	3190	3940	5093	7477	6116	6479	3788	4292	4061	4031	4200	6395	5836	5781	5343	4992.26	4146	5839	1.409	0.495	8.996	2.34435e-19	4.05903e-18	0.00288682	0.00227031	0.00269589	0.00269589	TRUE	0.0502365	No
orf19.1863	24	13	24	35	22	21	17	12	22	17	25	29	19	20	15	17	20.31	23	18	0.766	-0.384	-1.248	0.212192	0.289541	1e-08	0.0734726	0.041356	0.041356	TRUE	0.204769	No
orf19.1864	3284	2284	3008	3673	3094	2645	3026	2047	2946	2908	3077	3029	2646	2524	2700	2887	2839.67	2990	2689	0.898	-0.155	-3.262	0.00110718	0.00276817	0.00144073	0.00249075	0.00182328	0.00182328	TRUE	0.0278263	No
orf19.1865	925	626	815	1038	948	845	882	541	830	797	834	856	811	806	787	763	810.46	829	792	0.955	-0.066	-1.219	0.222786	0.301736	1e-08	0.00377073	0.0016083	0.0016083	TRUE	0.00726384	No
orf19.1866	439	311	364	446	436	317	340	236	394	396	372	368	373	302	303	333	355.19	382	328	0.859	-0.22	-2.489	0.0128155	0.0250964	0.00320392	0.00606659	0.00467035	0.00467035	TRUE	0.108524	No
orf19.1867	623	386	518	674	619	529	551	394	559	491	530	556	529	505	492	556	527.2	534	520	0.969	-0.046	-0.65	0.515897	0.600059	0.000933024	0.00473314	0.00292419	0.00292419	TRUE	0.0302901	No
orf19.1868	5860	4003	5035	6258	7428	6458	7075	4361	5257	5096	5151	5160	6353	6162	6313	6151	5705.47	5166	6245	1.209	0.274	9.19	3.91294e-20	7.10239e-19	1e-08	0.00223396	0.000674177	0.000674177	TRUE	0.00171553	No
orf19.1871	2571	1760	2290	2690	3420	2924	3239	2041	2306	2241	2343	2218	2925	2790	2890	2879	2574	2277	2871	1.261	0.334	8.726	2.63017e-18	4.19154e-17	1e-08	0.00254351	0.0010161	0.0010161	TRUE	0.00453215	No
orf19.1872	3309	2169	2817	3525	3379	2693	2876	2111	2969	2761	2882	2907	2890	2570	2566	2977	2815.23	2880	2751	0.954	-0.068	-1.182	0.237172	0.317994	0.00301016	0.00249518	0.00283273	0.00283273	TRUE	0.0355897	No
orf19.1873	1322	950	1124	1513	1242	1056	1152	807	1186	1209	1150	1248	1062	1008	1028	1138	1128.62	1198	1059	0.881	-0.183	-3.331	0.000864574	0.00220287	0.000869443	0.00326578	0.00199038	0.00199038	TRUE	0.0266664	No
orf19.1874	2	7	6	4	4	2	3	0	2	9	6	3	3	2	3	0	3.52	5	2	0.44	-1.183	-1.442	0.149351	NA	1e-08	0.414552	0.311725	0.311725	TRUE	0.167003	No
orf19.1876	1749	1229	1551	1912	1881	1508	1691	1213	1569	1565	1587	1577	1609	1439	1509	1711	1570.56	1574	1567	0.993	-0.01	-0.175	0.861258	0.895076	0.00182032	0.00290384	0.00242238	0.00242238	TRUE	0.0423348	No
orf19.1877	535	365	453	626	632	583	644	402	480	465	463	516	541	556	575	567	520.34	481	560	1.159	0.213	3.175	0.00150039	0.00363889	1e-08	0.00476942	0.00240667	0.00240667	TRUE	0.030144	No
orf19.1878	1240	823	1076	1310	1323	1072	1233	786	1112	1048	1101	1080	1131	1023	1100	1109	1088.06	1085	1091	1.004	0.006	0.109	0.912872	0.935767	0.000409438	0.00331374	0.00170413	0.00170413	TRUE	0.021692	No
orf19.188	1909	1372	1647	2192	2284	2117	2236	1384	1713	1747	1685	1808	1953	2020	1995	1952	1859.06	1738	1980	1.139	0.188	4.487	7.21622e-06	2.69453e-05	1e-08	0.0027604	0.0011466	0.0011466	TRUE	0.00949811	No
orf19.1880	4514	3040	3926	4740	3800	3321	3640	2206	4050	3870	4017	3909	3250	3169	3248	3111	3577.91	3962	3194	0.807	-0.31	-8.819	1.15585e-18	1.88193e-17	0.000148647	0.00238526	0.000898778	0.000898778	TRUE	0.00339869	No
orf19.1881	1046	739	885	1130	1402	1276	1230	835	938	941	905	932	1199	1218	1098	1178	1051.03	929	1173	1.262	0.336	6.34	2.2942e-10	1.59347e-09	1e-08	0.00336074	0.00173084	0.00173084	TRUE	0.0239031	No
orf19.1883	1771	1155	1552	1878	1956	1663	1853	1157	1589	1470	1588	1549	1673	1587	1653	1632	1592.58	1549	1636	1.055	0.078	1.725	0.0845201	0.132688	0.000173072	0.00289106	0.00132637	0.00132637	TRUE	0.0126822	No
orf19.1885	2762	1690	2200	2849	3025	2545	2838	1638	2478	2152	2251	2349	2587	2428	2532	2310	2385.95	2308	2464	1.068	0.095	1.706	0.0880551	0.13734	0.00249283	0.00258796	0.00257053	0.00257053	TRUE	0.0298444	No
orf19.1886	7308	4980	6386	7552	6333	5347	5799	3325	6556	6340	6534	6227	5416	5102	5175	4690	5754.93	6414	5096	0.795	-0.331	-6.986	2.82224e-12	2.45384e-11	0.00182592	0.00223178	0.00197382	0.00197382	TRUE	0.0338342	No
orf19.1887	1491	988	1360	1554	1359	1146	1254	768	1338	1258	1391	1281	1162	1093	1119	1083	1215.77	1317	1114	0.847	-0.24	-4.603	4.16773e-06	1.60408e-05	0.000696431	0.00317358	0.00177462	0.00177462	TRUE	0.0168129	No
orf19.1888	1451	940	1146	1464	1198	1028	1091	703	1302	1197	1172	1207	1025	981	974	992	1106.08	1220	993	0.813	-0.298	-5.633	1.76707e-08	9.47059e-08	0.000643966	0.003292	0.00176988	0.00176988	TRUE	0.0254146	No
orf19.1889	628	386	487	574	528	476	442	316	563	491	498	473	452	454	394	446	471.53	506	436	0.86	-0.217	-2.671	0.00756549	0.0156628	0.003429	0.00505824	0.00421702	0.00421702	TRUE	0.0696886	No
orf19.1890	3855	2501	3330	4108	4080	3460	3845	2680	3458	3184	3407	3388	3489	3301	3431	3780	3429.81	3359	3500	1.04	0.057	1.145	0.25231	0.334631	0.00192315	0.00240278	0.00208813	0.00208813	TRUE	0.0335023	No
orf19.1891	12177	7652	10477	12949	12297	9732	10461	6787	10924	9742	10719	10678	10517	9286	9335	9572	10096.6	10516	9678	0.92	-0.12	-2.26	0.0238372	0.0436894	0.00287877	0.0021233	0.00260979	0.00260979	TRUE	0.0420377	No
orf19.1893	1385	870	1138	1391	1426	1209	1309	803	1242	1108	1164	1147	1220	1154	1168	1133	1166.9	1165	1169	1.003	0.004	0.073	0.941747	0.957849	0.000812881	0.00322359	0.0018657	0.0018657	TRUE	0.0241357	No
orf19.1896	18600	12041	16661	19703	22154	18958	20649	13991	16686	15329	17046	16247	18947	18089	18426	19733	17563	16327	18799	1.151	0.203	4.603	4.17422e-06	1.60555e-05	0.00167862	0.00206218	0.00180979	0.00180979	TRUE	0.020492	No
orf19.1897	3136	2129	2713	3314	3151	2661	2890	1827	2813	2710	2776	2733	2695	2539	2579	2577	2677.72	2758	2598	0.942	-0.086	-2.298	0.0215401	0.0398807	1e-08	0.00252166	0.000980538	0.000980538	TRUE	0.00816084	No
orf19.190	446	387	434	513	502	570	499	294	400	493	444	423	429	544	445	415	449.12	440	458	1.047	0.066	0.66	0.509088	0.593212	0.00877152	0.00521182	0.00724665	0.00724665	TRUE	0.184389	No
orf19.1900	3389	2081	2906	3496	3124	2732	2941	1864	3040	2649	2973	2883	2672	2607	2624	2629	2759.69	2886	2633	0.911	-0.134	-2.801	0.00508862	0.0109736	0.00131934	0.00250556	0.0018305	0.0018305	TRUE	0.0353651	No
orf19.1901	9182	6164	8278	9853	9793	8687	9435	6000	8237	7847	8469	8125	8375	8289	8419	8462	8278.07	8170	8386	1.026	0.037	1.143	0.253149	0.335595	0.00037774	0.00215489	0.00089631	0.00089631	TRUE	0.00827856	No
orf19.1902	9628	6947	8633	10428	10423	9557	10461	6067	8637	8844	8832	8599	8914	9119	9335	8557	8854.72	8728	8981	1.03	0.042	1.19	0.234242	0.31512	0.000635802	0.00214347	0.00109617	0.00109617	TRUE	0.0119001	No
orf19.1906	83	60	75	111	78	81	68	55	74	76	77	92	67	77	61	78	75.17	80	71	0.875	-0.193	-1.174	0.240582	0.321919	1e-08	0.0212918	0.0126664	0.0126664	TRUE	0.104427	No
orf19.1907	4172	2561	3852	4241	4181	3427	4085	2558	3743	3260	3941	3497	3576	3270	3645	3608	3567.5	3610	3525	0.976	-0.035	-0.564	0.572838	0.651326	0.00381999	0.00238645	0.00350543	0.00350543	TRUE	0.0504482	No
orf19.191	3658	2683	3449	4304	4539	4218	4559	2940	3282	3416	3529	3549	3882	4025	4068	4147	3737.06	3444	4030	1.169	0.226	5.553	2.80864e-08	1.47117e-07	0.000658681	0.00236798	0.00131803	0.00131803	TRUE	0.0126791	No
orf19.1910	693	425	617	716	648	477	585	381	622	541	631	590	554	455	522	537	556.64	596	517	0.866	-0.208	-2.608	0.00911493	0.0185384	0.0040473	0.00458748	0.00431636	0.00431636	TRUE	0.0781159	No
orf19.1911	5122	3174	4475	5492	4663	3646	3960	2731	4595	4041	4578	4529	3988	3479	3534	3852	4074.41	4436	3713	0.836	-0.258	-4.301	1.70213e-05	5.98035e-05	0.00364974	0.00233582	0.00319711	0.00319711	TRUE	0.0428947	No
orf19.1913	737	441	617	813	875	582	681	570	661	561	631	670	748	555	608	804	654.94	631	679	1.071	0.1	0.897	0.369815	0.458303	0.0157733	0.00419606	0.0103002	0.0103002	TRUE	0.168818	No
orf19.1914	620	371	528	662	543	417	458	335	556	472	540	546	464	398	409	472	482.26	528	436	0.82	-0.286	-3.452	0.000555643	0.00148237	0.00399192	0.00498973	0.00450514	0.00450514	TRUE	0.0548126	No
orf19.1915	7467	4468	6388	7964	6484	4823	5370	3078	6699	5688	6536	6567	5545	4602	4792	4341	5596.25	6372	4820	0.757	-0.402	-5.236	1.63963e-07	7.80581e-07	0.00814513	0.00223893	0.00548984	0.00548984	TRUE	0.125481	No
orf19.1917	3174	1959	2829	3470	3139	2434	2834	1814	2847	2494	2894	2861	2685	2322	2529	2558	2648.94	2774	2524	0.909	-0.138	-2.24	0.0251011	0.0457967	0.0035584	0.00252755	0.00325662	0.00325662	TRUE	0.0544546	No
orf19.192	1768	1396	1636	1975	1765	1785	1882	1271	1586	1777	1674	1629	1509	1703	1679	1793	1668.8	1666	1671	1.002	0.003	0.053	0.95791	0.969529	0.00310691	0.00284943	0.00299814	0.00299814	TRUE	0.0520908	No
orf19.1920	23	17	31	23	32	12	18	10	21	22	32	19	27	11	16	14	20.24	24	17	0.756	-0.403	-1.159	0.24649	0.328435	0.0560686	0.0736942	0.0660817	0.0660817	TRUE	0.898005	No
orf19.1923	2248	1307	1994	2323	2683	2023	2429	1775	2017	1664	2040	1916	2295	1930	2167	2503	2066.51	1909	2224	1.163	0.218	2.582	0.00983533	0.0198424	0.00922957	0.00268201	0.00635182	0.00635182	TRUE	0.0954532	No
orf19.1925	25	22	26	34	37	37	32	28	22	28	27	28	32	35	29	39	30.01	26	34	1.274	0.349	1.401	0.161287	0.229352	1e-08	0.050356	0.0258792	0.0258792	TRUE	0.0771313	No
orf19.1926	279	257	283	347	247	234	217	189	250	327	290	286	211	223	194	267	255.98	288	224	0.772	-0.372	-3.224	0.00126536	0.00311954	0.0102988	0.00765056	0.00880767	0.00880767	TRUE	0.158369	No
orf19.1927	2016	1372	1756	2167	1726	1644	1713	1062	1809	1747	1797	1787	1476	1569	1529	1498	1651.25	1785	1518	0.85	-0.234	-5.559	2.70767e-08	1.42449e-07	1e-08	0.00285868	0.00109289	0.00109289	TRUE	0.00626038	No
orf19.193	364	341	353	409	433	509	497	287	327	434	361	337	370	486	443	405	395.42	365	426	1.174	0.231	2.101	0.0356082	0.0624443	0.0122373	0.00565081	0.00904731	0.00904731	TRUE	0.175823	No
orf19.1930	126	102	118	174	147	141	144	86	113	130	121	143	126	135	128	121	127.14	127	128	1.007	0.01	0.079	0.937162	0.954316	1e-08	0.0133973	0.0076481	0.0076481	TRUE	0.0946837	No
orf19.1932	1125	706	933	1213	1051	867	910	655	1009	899	955	1000	899	827	812	924	915.6	966	866	0.893	-0.164	-2.581	0.00985146	0.0198683	0.00187909	0.00356504	0.00277293	0.00277293	TRUE	0.0241665	No
orf19.1933	1631	1174	1455	1743	1685	1569	1660	997	1463	1495	1489	1437	1441	1497	1481	1406	1463.67	1471	1456	0.992	-0.011	-0.256	0.798015	0.843356	1e-08	0.00297135	0.00117506	0.00117506	TRUE	0.00555493	No
orf19.1934	2625	1758	2273	2771	2698	2438	2704	1821	2355	2238	2326	2285	2307	2326	2413	2568	2352.3	2301	2404	1.042	0.06	1.317	0.187948	0.260702	0.000914574	0.00259666	0.00156288	0.00156288	TRUE	0.0238159	No
orf19.1935	14	8	11	22	11	13	10	7	13	10	11	18	9	12	9	10	11.59	13	10	0.766	-0.385	-0.957	0.338746	NA	1e-08	0.127197	0.0692311	0.0692311	TRUE	0.345972	No
orf19.1936	6421	4356	5841	7180	8020	6740	7596	4880	5760	5546	5976	5921	6859	6431	6778	6883	6269.2	5801	6738	1.161	0.215	5.52	3.38351e-08	1.75545e-07	0.000822254	0.00221108	0.00129802	0.00129802	TRUE	0.0115131	No
orf19.1938	1790	1115	1436	1686	1076	963	1037	687	1606	1420	1469	1390	920	919	925	969	1202.27	1471	933	0.633	-0.659	-11.266	1.92443e-29	6.68322e-28	0.0018649	0.00318699	0.00240645	0.00240645	TRUE	0.0470394	No
orf19.1939	25	14	22	22	20	18	19	8	22	18	23	18	17	17	17	11	17.93	20	16	0.785	-0.349	-1.097	0.272674	0.357068	1e-08	0.0829568	0.0415284	0.0415284	TRUE	0.10341	No
orf19.194	1367	1412	1348	1798	1356	1648	1508	982	1226	1798	1379	1483	1160	1572	1346	1385	1418.57	1472	1366	0.929	-0.107	-0.944	0.345194	0.432429	0.0194053	0.00300288	0.0115318	0.0115318	TRUE	0.263652	No
orf19.1940	2336	1456	2010	2542	2851	2350	2646	1669	2096	1854	2056	2096	2438	2242	2361	2354	2187.19	2026	2349	1.158	0.212	4.113	3.89708e-05	0.000128294	0.00161828	0.00264325	0.00208316	0.00208316	TRUE	0.0373778	No
orf19.1941	841	600	746	897	935	794	849	493	754	764	763	740	800	758	758	695	753.93	755	753	1.001	0.001	0.018	0.985723	0.98918	1e-08	0.00390504	0.00203339	0.00203339	TRUE	0.0264949	No
orf19.1942	3312	2258	2930	3521	3049	2818	3009	1970	2971	2875	2998	2903	2608	2689	2685	2779	2813.38	2937	2690	0.915	-0.129	-3.451	0.000557528	0.00148674	0.000109031	0.00249552	0.000977309	0.000977309	TRUE	0.00540027	No
orf19.1943	381	343	418	519	431	446	430	296	342	437	428	428	369	426	384	417	403.68	409	399	0.976	-0.035	-0.371	0.710527	0.771246	0.0064893	0.00557568	0.00603513	0.00603513	TRUE	0.144597	No
orf19.1944	14305	9899	12895	16136	20649	17719	20142	12906	12833	12602	13193	13306	17660	16907	17973	18203	15334.6	12984	17686	1.362	0.445	12.587	2.49667e-36	1.36364e-34	0.000733091	0.00207419	0.00113583	0.00113583	TRUE	0.0107506	No
orf19.1945	19091	12755	16656	20125	19365	16882	18378	11219	17127	16238	17041	16595	16562	16108	16399	15823	16486.7	16750	16223	0.969	-0.046	-1.483	0.138011	0.200864	0.000424941	0.00206758	0.00086274	0.00086274	TRUE	0.00507408	No
orf19.1946	2758	1900	2294	2845	2556	2191	2292	1374	2474	2419	2347	2346	2186	2091	2045	1938	2230.73	2396	2065	0.863	-0.212	-4.524	6.071e-06	2.28537e-05	0.000978145	0.0026303	0.0016584	0.0016584	TRUE	0.0189916	No
orf19.1948	1093	703	977	1215	1151	939	1037	733	981	895	1000	1002	984	896	925	1034	964.56	970	960	0.986	-0.02	-0.314	0.753271	0.806711	0.00188659	0.00348456	0.00274854	0.00274854	TRUE	0.02925	No
orf19.1949	4379	2996	3890	4663	4098	3521	3831	2389	3928	3814	3980	3845	3505	3360	3419	3369	3652.5	3892	3413	0.877	-0.189	-5.511	3.56134e-08	1.84294e-07	0.000115801	0.00237698	0.000852174	0.000852174	TRUE	0.0041006	No
orf19.1950	506	354	443	510	583	442	497	389	454	451	453	421	499	422	443	549	461.36	445	478	1.072	0.1	1.139	0.254791	0.3374	0.00488545	0.00512609	0.00518363	0.00518363	TRUE	0.101182	No
orf19.1953	2519	1743	2223	2791	3206	2721	2961	1953	2260	2219	2274	2301	2742	2596	2642	2755	2473.7	2264	2684	1.184	0.244	6.313	2.74081e-10	1.88839e-09	1e-08	0.00256638	0.00102388	0.00102388	TRUE	0.00577735	No
orf19.1954	4926	3174	4239	5144	4939	4418	4921	2826	4419	4041	4337	4242	4224	4216	4391	3986	4231.9	4260	4204	0.987	-0.018	-0.421	0.673797	0.739397	0.00110749	0.00232256	0.00161325	0.00161325	TRUE	0.0141351	No
orf19.1955	961	633	785	881	887	766	802	541	862	806	803	726	759	731	716	763	770.72	799	742	0.928	-0.108	-1.64	0.101072	0.154181	0.00199072	0.00386308	0.00283016	0.00283016	TRUE	0.0485675	No
orf19.1956	3326	2473	3069	3602	3764	3379	3537	2316	2984	3148	3140	2970	3219	3224	3156	3267	3138.53	3060	3216	1.051	0.072	1.935	0.0529407	0.0884012	0.000275103	0.00244206	0.00102444	0.00102444	TRUE	0.0048419	No
orf19.1957	9032	5803	7701	9452	10981	8991	9929	5810	8103	7388	7879	7794	9391	8579	8860	8194	8273.54	7791	8756	1.124	0.169	3.422	0.000620513	0.00163153	0.00222693	0.00215499	0.00221476	0.00221476	TRUE	0.0291761	No
orf19.1958	21	14	22	19	13	13	17	13	19	18	23	16	11	12	15	18	16.48	19	14	0.75	-0.415	-1.226	0.220305	0.298982	1e-08	0.090051	0.0480365	0.0480365	TRUE	0.108217	No
orf19.1959	1815	1274	1630	1890	1320	1259	1266	894	1628	1622	1668	1559	1129	1201	1130	1261	1399.64	1619	1180	0.727	-0.46	-8.899	5.61072e-19	9.38976e-18	0.000865117	0.00301672	0.00182354	0.00182354	TRUE	0.0227111	No
orf19.1960	4892	3718	4588	5469	6339	5973	6402	4019	4389	4733	4694	4510	5421	5699	5713	5668	5103.44	4582	5625	1.228	0.297	7.711	1.24633e-14	1.37646e-13	0.000653841	0.00226398	0.00122327	0.00122327	TRUE	0.00977035	No
orf19.1961	8360	6161	7564	9403	9144	8859	9615	5557	7500	7844	7739	7754	7820	8453	8580	7838	7940.83	7709	8173	1.061	0.085	2.029	0.0424092	0.0728193	0.00121328	0.00216234	0.00155375	0.00155375	TRUE	0.0137907	No
orf19.1963	5017	3488	4531	5254	5059	4545	5046	2765	4501	4441	4636	4333	4327	4337	4503	3900	4371.92	4478	4267	0.954	-0.068	-1.384	0.166212	0.23563	0.00191383	0.00231157	0.00208121	0.00208121	TRUE	0.0390874	No
orf19.1964	3317	2365	3017	3634	2680	2592	2703	1789	2976	3011	3087	2997	2292	2473	2412	2523	2721.29	3018	2425	0.803	-0.317	-7.646	2.07527e-14	2.227e-13	0.000477748	0.00251298	0.00127776	0.00127776	TRUE	0.0168897	No
orf19.1966	4642	3058	3896	4931	4567	3888	4219	2598	4164	3893	3986	4066	3906	3710	3765	3664	3894.29	4027	3761	0.934	-0.099	-2.584	0.0097695	0.0197261	0.000456685	0.0023523	0.00113892	0.00113892	TRUE	0.00828837	No
orf19.1967	1519	1047	1302	1584	1565	1301	1449	789	1363	1333	1332	1306	1338	1241	1293	1113	1289.94	1334	1246	0.938	-0.093	-1.563	0.118108	0.175889	0.00216362	0.00310492	0.00259433	0.00259433	TRUE	0.0567003	No
orf19.1968	123	107	158	149	106	95	117	78	110	136	162	123	91	91	104	110	115.85	133	99	0.744	-0.427	-2.83	0.00465759	0.0101277	0.0111184	0.0145104	0.0129546	0.0129546	TRUE	0.226211	No
orf19.1968.1	275	207	214	278	245	233	210	137	247	264	219	229	210	222	187	193	221.36	240	203	0.852	-0.231	-2.256	0.0240961	0.0441102	0.00153319	0.00853758	0.00554031	0.00554031	TRUE	0.0442051	No
orf19.1969	68	41	61	58	50	31	40	34	61	52	62	48	43	30	36	48	47.43	56	39	0.691	-0.534	-2.502	0.012366	0.0243112	9.86349e-05	0.032588	0.0218993	0.0218993	TRUE	0.194889	No
orf19.1970	2299	1621	1997	2540	2499	2112	2370	1632	2062	2064	2043	2095	2137	2015	2115	2302	2104.11	2066	2142	1.035	0.049	1.053	0.292241	0.376868	0.000957748	0.00266946	0.00164148	0.00164148	TRUE	0.0278635	No
orf19.1971	13220	9023	11254	13976	12433	10958	11911	7586	11860	11487	11514	11525	10633	10456	10629	10699	11100.3	11596	10604	0.914	-0.129	-4.954	7.27437e-07	3.13969e-06	8.20024e-05	0.0021103	0.00056443	0.00056443	TRUE	0.00289132	No
orf19.1972	4205	2783	3676	4454	4432	3654	3903	2581	3772	3543	3761	3673	3790	3487	3483	3640	3643.63	3687	3600	0.976	-0.035	-0.829	0.407079	0.495241	0.000875954	0.00237794	0.00146448	0.00146448	TRUE	0.0161914	No
orf19.1973	1137	658	849	1145	1248	950	1152	692	1020	838	869	944	1067	906	1028	976	956.03	918	994	1.082	0.114	1.502	0.133142	0.195198	0.00500392	0.00349799	0.0045089	0.0045089	TRUE	0.067088	No
orf19.1974	3930	2734	3386	4448	4953	4094	4594	3278	3526	3481	3464	3668	4236	3906	4099	4623	3875.43	3535	4216	1.191	0.253	4.716	2.40799e-06	9.66413e-06	0.00258183	0.00235411	0.0024946	0.0024946	TRUE	0.049696	No
orf19.1975	662	460	569	718	588	558	534	298	594	586	582	592	503	532	477	420	535.73	588	483	0.825	-0.278	-3.732	0.000190052	0.000555908	0.00189321	0.00468929	0.00343233	0.00343233	TRUE	0.0748002	No
orf19.1976	512	364	451	595	451	432	469	270	459	463	461	491	386	412	419	381	434	468	400	0.853	-0.23	-3.218	0.00128972	0.00317308	1e-08	0.00532444	0.00257881	0.00257881	TRUE	0.0126955	No
orf19.1977	1197	874	1147	1313	1387	1203	1265	925	1074	1113	1173	1083	1186	1148	1129	1305	1151.28	1111	1192	1.071	0.099	1.668	0.0952502	0.146922	0.00185247	0.00324047	0.00249014	0.00249014	TRUE	0.044094	No
orf19.1978	1068	704	889	1127	955	873	937	575	958	896	910	929	817	833	836	811	873.76	923	824	0.892	-0.165	-3.159	0.00158436	0.00381822	1e-08	0.00364096	0.00146556	0.00146556	TRUE	0.00765796	No
orf19.1979	15042	10432	13631	16654	22144	20492	21615	12990	13494	13281	13946	13733	18938	19553	19288	18321	16319.3	13614	19025	1.398	0.483	14.816	1.15205e-49	1.17314e-47	0.000531986	0.00206848	0.000957436	0.000957436	TRUE	0.00742818	No
orf19.198	5296	3831	4818	5921	5538	4894	5401	3618	4751	4877	4929	4883	4736	4670	4819	5103	4846.06	4860	4832	0.993	-0.01	-0.254	0.799334	0.844452	0.000569329	0.00227909	0.00116631	0.00116631	TRUE	0.0163743	No
orf19.1980	100	83	101	116	111	107	110	54	90	106	103	96	95	102	98	76	95.71	99	93	0.955	-0.066	-0.458	0.646995	0.716525	1e-08	0.0171466	0.009817	0.009817	TRUE	0.104885	No
orf19.1981	1756	1162	1400	1802	2014	1736	1842	1073	1575	1479	1432	1486	1722	1656	1644	1513	1563.61	1493	1634	1.096	0.132	2.476	0.0132794	0.0259203	0.00137855	0.00290795	0.00209672	0.00209672	TRUE	0.027188	No
orf19.1985	578	483	577	712	643	584	680	414	519	615	590	587	550	557	607	584	576.09	578	574	0.996	-0.006	-0.084	0.933105	0.951798	0.00206232	0.00449944	0.00324825	0.00324825	TRUE	0.0573132	No
orf19.1986	2507	1572	2120	2576	2656	2283	2489	1519	2249	2001	2169	2124	2271	2178	2221	2142	2169.6	2136	2203	1.031	0.044	0.954	0.34013	0.427201	0.000878621	0.00264863	0.00161922	0.00161922	TRUE	0.0203705	No
orf19.1988	1330	863	1132	1360	1378	1139	1245	858	1193	1099	1158	1121	1179	1087	1111	1210	1144.73	1143	1147	1.001	0.001	0.02	0.983978	0.988016	0.000941677	0.00324768	0.00197042	0.00197042	TRUE	0.0146469	No
orf19.1989	4213	2893	3793	4627	4210	3733	4028	2580	3780	3683	3881	3815	3601	3562	3594	3639	3694.29	3790	3599	0.949	-0.076	-2.302	0.0213116	0.0394942	1e-08	0.00237248	0.000765181	0.000765181	TRUE	0.00402771	No
orf19.199	2506	2223	2533	3018	2665	2790	2955	1650	2248	2830	2592	2489	2279	2662	2637	2327	2507.97	2540	2476	0.976	-0.035	-0.451	0.652075	0.721087	0.00742322	0.00255836	0.00526852	0.00526852	TRUE	0.0725168	No
orf19.1990	2784	2348	2681	3203	3063	3345	3462	2059	2498	2989	2743	2641	2620	3192	3089	2904	2834.44	2718	2951	1.087	0.12	1.664	0.096051	0.147717	0.00605154	0.00249169	0.00462971	0.00462971	TRUE	0.0709636	No
orf19.1991	3310	2515	2805	3656	3881	3731	3837	2448	2969	3202	2870	3015	3319	3560	3424	3453	3226.45	3014	3439	1.142	0.191	4.302	1.69486e-05	5.9583e-05	0.00106513	0.00242946	0.0015806	0.0015806	TRUE	0.0202859	No
orf19.1992	3845	3081	3466	4352	3360	3456	3692	2316	3449	3922	3546	3589	2874	3298	3294	3267	3404.85	3626	3183	0.878	-0.188	-3.186	0.00144347	0.00351678	0.00332445	0.00240589	0.00304822	0.00304822	TRUE	0.0531174	No
orf19.1993	1216	1538	1217	1796	1265	1651	1531	935	1091	1958	1245	1481	1082	1575	1366	1319	1389.64	1444	1336	0.925	-0.112	-0.531	0.595512	0.672779	0.0419057	0.00302418	0.0215632	0.0419057	TRUE	0.660375	No
orf19.1994	1514	1186	1383	1743	1492	1642	1744	1157	1358	1510	1415	1437	1276	1567	1556	1632	1468.9	1430	1508	1.053	0.075	0.995	0.319755	0.406407	0.00618101	0.00296781	0.00475927	0.00475927	TRUE	0.131674	No
orf19.1995	552	515	524	695	544	543	525	302	495	656	536	573	465	518	468	426	517.23	565	469	0.835	-0.26	-2.773	0.00555314	0.0118815	0.00794019	0.00478621	0.00648352	0.00648352	TRUE	0.128046	No
orf19.1996	7085	5069	6284	7620	7192	6588	7097	4291	6356	6453	6429	6284	6151	6286	6333	6052	6292.99	6380	6206	0.973	-0.039	-1.296	0.194999	0.268581	7.36129e-05	0.00221021	0.000709294	0.000709294	TRUE	0.00313391	No
orf19.1998	344	220	322	368	367	319	337	221	309	280	329	303	314	304	301	312	306.53	305	308	1.005	0.007	0.081	0.935545	0.953802	1e-08	0.00671542	0.00333726	0.00333726	TRUE	0.0293652	No
orf19.1999	2076	1335	1635	2145	1911	1601	1723	1055	1862	1700	1673	1769	1634	1528	1537	1488	1648.87	1751	1547	0.884	-0.178	-3.431	0.000602441	0.00159237	0.00138437	0.00285994	0.00198043	0.00198043	TRUE	0.0223827	No
orf19.20	1987	1414	1807	2152	2552	2444	2486	1629	1783	1800	1849	1775	2183	2332	2218	2298	2029.56	1802	2258	1.253	0.325	7.816	5.4571e-15	6.26888e-14	1e-08	0.0026948	0.00115906	0.00115906	TRUE	0.00646217	No
orf19.200	1328	824	1071	1373	1072	998	1118	599	1191	1049	1096	1132	917	952	998	845	1022.48	1117	928	0.832	-0.266	-4.138	3.49821e-05	0.00011631	0.00254675	0.0033993	0.00297592	0.00297592	TRUE	0.038538	No
orf19.2000	3775	3011	3408	4054	3654	3792	4004	2245	3387	3833	3487	3343	3125	3618	3573	3166	3441.51	3512	3370	0.961	-0.058	-0.897	0.369675	0.458226	0.00444062	0.00240134	0.00370433	0.00370433	TRUE	0.0452251	No
orf19.2001	445	408	405	560	607	678	702	388	399	519	414	462	519	647	626	547	516.81	448	585	1.308	0.388	3.866	0.000110845	0.000336852	0.0101735	0.00478848	0.00767308	0.00767308	TRUE	0.121181	No
orf19.2002	2785	2361	2734	3289	3030	3061	3031	2009	2498	3006	2797	2712	2591	2921	2705	2834	2757.97	2753	2763	1.004	0.005	0.088	0.930184	0.949464	0.00392004	0.00250589	0.00334158	0.00334158	TRUE	0.0472151	No
orf19.2003	9040	6514	8185	10105	8360	7676	8230	4854	8110	8293	8374	8333	7150	7324	7344	6846	7721.7	8278	7166	0.866	-0.207	-6.156	7.44668e-10	4.82108e-09	0.000442386	0.00216753	0.000954486	0.000954486	TRUE	0.0104657	No
orf19.2005	14516	9869	12843	15978	18724	16446	17945	11023	13022	12564	13140	13176	16013	15692	16013	15547	14395.9	12976	15816	1.219	0.286	9.965	2.17948e-23	4.95996e-22	0.000252587	0.00208036	0.000717956	0.000717956	TRUE	0.00542105	No
orf19.2006	1095	861	1006	1237	908	867	935	566	982	1096	1029	1020	777	827	834	798	920.52	1032	809	0.786	-0.348	-6.184	6.23859e-10	4.0785e-09	0.000531871	0.00355656	0.00193138	0.00193138	TRUE	0.0192371	No
orf19.2006.1	1531	1284	1324	1837	2255	1972	1955	1188	1373	1635	1355	1515	1929	1882	1745	1676	1638.47	1470	1808	1.233	0.302	4.257	2.07556e-05	7.19144e-05	0.00529113	0.00286553	0.00420812	0.00420812	TRUE	0.0660013	No
orf19.2007	460	341	424	509	536	526	510	317	413	434	434	420	458	502	455	447	445.35	425	466	1.098	0.135	1.908	0.0564089	0.0932081	1e-08	0.0052392	0.00259002	0.00259002	TRUE	0.0321232	No
orf19.2008	1586	1216	1361	1723	1670	1670	1786	1042	1423	1548	1392	1421	1428	1593	1594	1470	1483.65	1446	1521	1.054	0.076	1.34	0.180354	0.252013	0.00182219	0.00295799	0.00239822	0.00239822	TRUE	0.0254816	No
orf19.2009	1697	1407	1647	1941	1934	1752	1864	1136	1522	1791	1685	1601	1654	1672	1663	1602	1648.82	1650	1648	1.001	0.002	0.035	0.972262	0.98075	0.00192454	0.00285997	0.00231571	0.00231571	TRUE	0.0383358	No
orf19.201	290	179	246	292	262	213	254	130	260	228	252	241	224	203	227	183	227.23	245	209	0.858	-0.22	-2.201	0.0277187	0.0499352	0.000726935	0.00836824	0.00521844	0.00521844	TRUE	0.061273	No
orf19.2010	24	9	12	23	14	20	23	9	22	11	12	19	12	19	21	13	16.06	16	16	0.992	-0.012	-0.032	0.974636	0.981991	0.0241141	0.0923538	0.065211	0.065211	TRUE	0.254148	No
orf19.2012	3304	2351	2932	3602	3759	3403	3540	2238	2964	2993	3000	2970	3215	3247	3159	3156	3088.04	2982	3194	1.072	0.1	3.058	0.00223116	0.00521995	1e-08	0.00244963	0.000705342	0.000705342	TRUE	0.0014798	No
orf19.2013	8393	5574	7367	8694	10555	8738	9585	6144	7529	7096	7537	7169	9027	8338	8553	8666	7989.39	7333	8646	1.179	0.237	6.115	9.68326e-10	6.1759e-09	0.00089347	0.00216123	0.00132146	0.00132146	TRUE	0.0109935	No
orf19.2014	6593	4361	5675	6809	6808	5818	6304	4158	5915	5552	5806	5615	5822	5551	5625	5864	5718.88	5722	5716	0.998	-0.002	-0.066	0.947663	0.962394	0.000492092	0.00223337	0.00110822	0.00110822	TRUE	0.00632753	No
orf19.2016	236	214	212	313	219	247	207	138	212	272	217	258	187	236	185	195	220.19	240	201	0.838	-0.254	-2.11	0.0348412	0.0612601	0.0101937	0.00857259	0.00934189	0.00934189	TRUE	0.157311	No
orf19.2017	6818	4840	5983	7194	6121	5487	5798	3879	6116	6162	6121	5932	5235	5236	5174	5471	5680.86	6083	5279	0.867	-0.205	-6.31	2.79168e-10	1.92124e-09	0.000215717	0.00223507	0.000838438	0.000838438	TRUE	0.00683831	No
orf19.2018	1684	1181	1462	1764	1651	1361	1460	1108	1511	1504	1496	1455	1412	1299	1303	1563	1442.6	1492	1394	0.933	-0.101	-1.62	0.105211	0.159141	0.00317947	0.00298583	0.00300575	0.00300575	TRUE	0.0739527	No
orf19.2018.1	136	109	110	149	116	106	122	83	122	139	113	123	99	101	109	117	115.31	124	106	0.857	-0.222	-1.693	0.0904868	0.140716	1e-08	0.0145693	0.00782118	0.00782118	TRUE	0.0537315	No
orf19.2018.2	10	18	9	20	18	12	9	7	9	23	9	16	15	11	8	10	12.79	14	11	0.796	-0.329	-0.768	0.442261	NA	0.0713038	0.115466	0.096904	0.096904	TRUE	0.409077	No
orf19.2019	2292	1538	1884	2363	2861	2363	2529	1850	2056	1958	1928	1949	2447	2255	2257	2609	2182.22	1973	2392	1.211	0.276	4.948	7.5141e-07	3.23155e-06	0.00234831	0.00264476	0.00251624	0.00251624	TRUE	0.0428503	No
orf19.202	5640	3878	5036	6071	5247	4506	4771	3194	5060	4937	5152	5006	4487	4299	4257	4505	4713.05	5039	4387	0.87	-0.201	-5.736	9.69364e-09	5.36768e-08	0.000297514	0.00228754	0.000961949	0.000961949	TRUE	0.00487849	No
orf19.2020	8584	5722	7688	9525	11044	9528	10493	6820	7701	7285	7866	7854	9445	9091	9363	9619	8528.03	7676	9380	1.221	0.288	7.828	4.96694e-15	5.72771e-14	0.000743212	0.00214975	0.00118248	0.00118248	TRUE	0.0140054	No
orf19.2021	29902	20045	26373	33700	30152	25220	27159	16389	26825	25519	26982	27789	25787	24064	24235	23115	25539.7	26779	24300	0.907	-0.14	-3.252	0.00114438	0.00284696	0.00160091	0.00203636	0.00174175	0.00174175	TRUE	0.0207957	No
orf19.2023	31297	20271	28198	35671	27155	21870	24432	15567	28077	25807	28849	29415	23224	20868	21801	21956	24999.6	28037	21962	0.783	-0.352	-7.021	2.20739e-12	1.94743e-11	0.0025157	0.00203759	0.0023801	0.0023801	TRUE	0.0349586	No
orf19.2024	28	23	35	39	39	32	26	17	25	29	36	32	33	31	23	24	29.18	30	28	0.916	-0.127	-0.491	0.623559	0.696476	1e-08	0.0517307	0.0300757	0.0300757	TRUE	0.132659	No
orf19.2025	5	4	3	11	1	4	3	0	4	5	3	9	1	4	3	0	3.63	5	2	0.353	-1.504	-1.851	0.0641796	NA	0.089731	0.401527	0.286256	0.286256	TRUE	0.553867	No
orf19.2026	595	375	510	579	569	540	540	329	534	477	522	477	487	515	482	464	494.77	502	487	0.97	-0.044	-0.622	0.534161	0.616332	1e-08	0.0049136	0.00284571	0.00284571	TRUE	0.0212382	No
orf19.2028	4303	2821	3588	4495	4196	3596	3849	2568	3860	3591	3671	3707	3589	3431	3435	3622	3613.18	3707	3519	0.948	-0.077	-1.964	0.0494764	0.0834514	0.000500628	0.0023813	0.00119107	0.00119107	TRUE	0.00941949	No
orf19.2029	547	427	562	654	517	522	549	330	491	544	575	539	442	498	490	465	505.52	537	474	0.883	-0.179	-2.397	0.0165238	0.031427	0.00189929	0.00485122	0.00335242	0.00335242	TRUE	0.0412665	No
orf19.203	2554	1682	2324	2729	3379	2955	3321	2300	2291	2141	2378	2250	2890	2820	2963	3244	2622.17	2265	2979	1.313	0.393	7.256	3.97596e-13	3.87156e-12	0.00236943	0.00253315	0.00242211	0.00242211	TRUE	0.0414705	No
orf19.2030	10825	6809	8920	10855	11158	8570	9276	6447	9711	8669	9126	8951	9543	8177	8277	9093	8943.38	9114	8772	0.962	-0.055	-0.948	0.343273	0.43029	0.00365606	0.00214184	0.00317856	0.00317856	TRUE	0.0432432	No
orf19.2031	1964	1303	1636	2108	2101	1922	2084	1208	1762	1659	1674	1738	1797	1834	1860	1704	1753.37	1708	1799	1.054	0.075	1.649	0.0991218	0.151765	0.000381788	0.00280747	0.00142827	0.00142827	TRUE	0.0135488	No
orf19.2032	3	6	2	4	8	4	9	3	3	8	2	3	7	4	8	4	4.82	4	6	1.551	0.633	0.973	0.330747	NA	1e-08	0.302886	0.189431	0.189431	TRUE	0.487066	No
orf19.2033	8	5	5	9	6	2	11	8	7	6	5	7	5	2	10	11	6.78	6	7	1.042	0.06	0.105	0.916368	NA	0.0717721	0.216181	0.163263	0.163263	TRUE	0.303414	No
orf19.2034	13	14	14	8	16	14	17	5	12	18	14	7	14	13	15	7	12.46	13	12	1.025	0.036	0.086	0.931384	NA	0.0321311	0.1185	0.0864264	0.0864264	TRUE	0.401657	No
orf19.2035	110	89	119	138	141	128	111	89	99	113	122	114	121	122	99	126	114.35	112	117	1.042	0.059	0.43	0.667307	0.734282	1e-08	0.0146743	0.00914147	0.00914147	TRUE	0.113111	No
orf19.2036	460	322	401	517	487	421	459	309	413	410	410	426	416	402	410	436	415.35	415	416	0.999	-0.001	-0.017	0.986647	0.989612	1e-08	0.00547465	0.00232836	0.00232836	TRUE	0.00969433	No
orf19.2037	554	410	503	632	545	464	474	306	497	522	515	521	466	443	423	432	477.27	514	441	0.86	-0.218	-3.212	0.00131768	0.00323129	1e-08	0.00502122	0.00231035	0.00231035	TRUE	0.0187924	No
orf19.2038	704	574	710	802	576	615	609	427	632	731	726	661	493	587	543	602	621.9	688	556	0.808	-0.308	-3.816	0.000135542	0.000404539	0.00486763	0.00431384	0.00460087	0.00460087	TRUE	0.0717835	No
orf19.2039	2232	1472	1816	2395	2359	1901	2235	1324	2002	1874	1858	1975	2017	1814	1994	1867	1925.29	1927	1923	0.998	-0.003	-0.054	0.956805	0.969176	0.00153006	0.00273354	0.00200506	0.00200506	TRUE	0.0187724	No
orf19.204	1084	787	963	1223	880	746	862	532	972	1002	985	1009	753	712	769	750	869.01	992	746	0.752	-0.411	-7.75	9.19219e-15	1.03227e-13	1e-08	0.00365004	0.00152583	0.00152583	TRUE	0.0118273	No
orf19.2040	2731	1892	2398	2863	2568	2253	2474	1488	2450	2409	2453	2361	2196	2150	2208	2099	2290.66	2418	2163	0.896	-0.159	-4.15	3.32912e-05	0.00011118	1e-08	0.00261327	0.000968258	0.000968258	TRUE	0.00431261	No
orf19.2041	850	560	742	908	1001	985	1039	582	763	713	759	749	856	940	927	821	815.91	746	886	1.189	0.25	4.058	4.95445e-05	0.000160379	0.00119254	0.00375876	0.00241271	0.00241271	TRUE	0.0252731	No
orf19.2042	1568	973	1240	1581	1669	1369	1496	876	1407	1239	1269	1304	1427	1306	1335	1236	1315.23	1305	1326	1.017	0.025	0.411	0.681405	0.745562	0.00251	0.00308329	0.00275802	0.00275802	TRUE	0.0336943	No
orf19.2043	839	594	715	895	899	777	857	567	753	756	732	738	769	741	765	800	756.64	745	769	1.031	0.044	0.798	0.424691	0.512106	1e-08	0.00389814	0.00157893	0.00157893	TRUE	0.00727577	No
orf19.2044	404	340	371	468	488	489	471	321	362	433	380	386	417	467	420	453	414.72	390	439	1.128	0.173	2.168	0.0301408	0.0538146	0.00172189	0.00547997	0.00370892	0.00370892	TRUE	0.0553747	No
orf19.2045	6481	4557	5704	7089	5803	5492	5705	3795	5814	5802	5836	5846	4963	5240	5091	5353	5492.95	5824	5162	0.885	-0.176	-5.175	2.27593e-07	1.05998e-06	0.000307409	0.00224381	0.000922072	0.000922072	TRUE	0.00822392	No
orf19.2046	779	523	658	792	798	645	749	438	699	666	673	653	682	615	668	618	659.38	673	646	0.963	-0.055	-0.876	0.381261	0.470545	1e-08	0.00418115	0.00225872	0.00225872	TRUE	0.0172923	No
orf19.2047	1371	892	1153	1434	1643	1426	1521	931	1230	1136	1180	1182	1405	1361	1357	1313	1270.47	1182	1359	1.15	0.202	4.214	2.50594e-05	8.55028e-05	1e-08	0.00312217	0.00140875	0.00140875	TRUE	0.00893789	No
orf19.2048	8219	5586	6873	8860	15558	12582	13136	9718	7373	7112	7032	7306	13306	12005	11722	13706	9945.22	7206	12685	1.76	0.815	14.979	1.00588e-50	1.09878e-48	0.00302227	0.00212549	0.00273714	0.00273714	TRUE	0.0355431	No
orf19.2049	817	708	819	1025	681	658	623	377	733	901	838	845	582	628	556	532	701.92	829	574	0.695	-0.524	-6.689	2.2425e-11	1.76579e-10	0.00475109	0.00404771	0.00441734	0.00441734	TRUE	0.0739303	No
orf19.2050	5051	3483	4179	5401	7142	6226	6871	4275	4531	4434	4276	4454	6108	5941	6131	6030	5238.03	4424	6052	1.368	0.452	13.893	6.9498e-44	5.42265e-42	0.000134887	0.00225667	0.000820636	0.000820636	TRUE	0.00621739	No
orf19.2051	509	341	484	570	406	387	437	292	457	434	495	470	347	369	390	412	421.78	464	380	0.813	-0.298	-3.793	0.000148708	0.000440987	0.00131859	0.00542137	0.00353298	0.00353298	TRUE	0.0388641	No
orf19.2054	1885	1219	1608	1955	2150	1905	2224	1356	1691	1552	1645	1612	1839	1818	1985	1913	1756.72	1625	1889	1.161	0.215	4.45	8.5983e-06	3.16729e-05	0.000912036	0.0028059	0.00166506	0.00166506	TRUE	0.0151682	No
orf19.2055	2847	1873	2334	2943	2806	2307	2498	1493	2554	2385	2388	2427	2400	2201	2229	2106	2336.15	2438	2234	0.917	-0.125	-2.503	0.012309	0.0242149	0.00146349	0.00260093	0.00195532	0.00195532	TRUE	0.0305694	No
orf19.2057	6032	4136	5424	6569	6606	5900	6590	4203	5411	5266	5549	5417	5650	5630	5880	5928	5591.34	5411	5772	1.066	0.092	2.68	0.00735327	0.0152655	0.000347633	0.00223916	0.000954299	0.000954299	TRUE	0.00380603	No
orf19.2059	1823	1233	1606	2019	1442	1292	1403	957	1635	1570	1643	1665	1233	1233	1252	1350	1447.61	1628	1267	0.775	-0.367	-7.701	1.35041e-14	1.48323e-13	0.000229649	0.00298235	0.00147918	0.00147918	TRUE	0.020395	No
orf19.206	1935	1306	1728	2046	1439	1228	1302	945	1736	1663	1768	1687	1231	1172	1162	1333	1468.84	1714	1224	0.712	-0.489	-9.152	5.59575e-20	1.00657e-18	0.00127518	0.00296786	0.00204206	0.00204206	TRUE	0.0382454	No
orf19.2060	70	33	54	58	54	36	41	33	63	42	55	48	46	34	37	47	46.44	52	41	0.778	-0.362	-1.692	0.090737	0.140974	1e-08	0.033237	0.0222805	0.0222805	TRUE	0.169553	No
orf19.2061	7	5	2	7	7	4	1	1	6	6	2	6	6	4	1	1	4.07	5	3	0.613	-0.706	-0.958	0.33787	NA	0.0956334	0.358556	0.265091	0.265091	TRUE	0.678394	No
orf19.2062	511	346	433	602	340	282	279	250	458	440	443	496	291	269	249	353	374.97	459	290	0.626	-0.676	-6.699	2.09427e-11	1.65442e-10	0.00830135	0.00585105	0.00695418	0.00695418	TRUE	0.203801	No
orf19.2063	3191	2116	2956	3388	3845	3511	3841	2453	2863	2694	3024	2794	3288	3350	3427	3460	3112.53	2844	3381	1.188	0.249	5.618	1.92982e-08	1.03061e-07	0.00102263	0.00244593	0.00155396	0.00155396	TRUE	0.0217218	No
orf19.2064	2088	1376	1840	2261	2696	2179	2351	1439	1873	1752	1883	1864	2306	2079	2098	2030	1985.52	1843	2128	1.155	0.208	4.008	6.12671e-05	0.000195171	0.00151686	0.00271067	0.00208162	0.00208162	TRUE	0.0390256	No
orf19.2065	148	84	139	174	111	88	134	54	133	107	142	143	95	84	120	76	112.5	131	94	0.716	-0.482	-2.996	0.00273869	0.00627538	0.0165342	0.014883	0.0157325	0.0157325	TRUE	0.341588	No
orf19.2066	1215	821	1036	1297	1060	944	987	654	1090	1045	1060	1070	907	901	881	922	984.38	1066	903	0.845	-0.243	-4.952	7.35637e-07	3.17052e-06	1e-08	0.00345425	0.00129193	0.00129193	TRUE	0.00318037	No
orf19.2066.1	2254	1523	1928	2488	2408	1878	1897	1279	2022	1939	1973	2052	2059	1792	1693	1804	1916.65	1996	1837	0.92	-0.12	-1.943	0.0520304	0.0870506	0.00324499	0.00273694	0.00312936	0.00312936	TRUE	0.0830345	No
orf19.2067	4015	2653	3320	4249	4618	4025	4257	2472	3602	3378	3397	3504	3949	3841	3799	3487	3619.38	3470	3769	1.087	0.12	2.565	0.0103133	0.0207023	0.00146889	0.00238061	0.00183281	0.00183281	TRUE	0.029393	No
orf19.2068	506	418	489	537	544	494	531	320	454	532	500	443	465	471	474	451	473.87	482	465	0.971	-0.043	-0.565	0.572237	0.651013	0.00175476	0.00504301	0.00343336	0.00343336	TRUE	0.0520024	No
orf19.2069	2594	1762	2298	2799	2614	2210	2411	1584	2327	2243	2351	2308	2236	2109	2151	2234	2244.91	2307	2182	0.945	-0.082	-2.051	0.0402477	0.0694452	0.000122643	0.00262619	0.00108558	0.00108558	TRUE	0.00624215	No
orf19.207	2554	1732	2412	2900	2516	2078	2292	1647	2291	2205	2468	2391	2152	1983	2045	2323	2232.25	2339	2126	0.907	-0.141	-2.399	0.016456	0.031317	0.00305881	0.00262985	0.00285326	0.00285326	TRUE	0.044611	No
orf19.2070	2973	2000	2601	3232	3312	3040	3241	2039	2667	2546	2661	2665	2833	2901	2892	2876	2755.08	2635	2876	1.09	0.125	3.51	0.000447415	0.00122129	1e-08	0.00250644	0.000843871	0.000843871	TRUE	0.00571812	No
orf19.2071	0	1	0	1	1	1	3	1	0	1	0	1	1	1	3	1	1	0	2	3.01	1.59	1.086	0.277453	NA	1e-08	1.45467	0.783351	0.783351	TRUE	0.248798	No
orf19.2072	8	10	17	14	6	9	10	17	7	13	17	12	5	9	9	24	11.93	12	12	0.916	-0.127	-0.256	0.798173	NA	0.185787	0.123633	0.150975	0.150975	TRUE	1.15742	No
orf19.2073	8990	5669	7852	9383	10479	8744	9716	6082	8065	7217	8033	7737	8962	8343	8670	8578	8200.77	7763	8638	1.112	0.154	3.45	0.000560121	0.00149233	0.00155553	0.00215654	0.00178371	0.00178371	TRUE	0.0268148	No
orf19.2074	171	132	172	190	254	194	204	122	153	168	176	157	217	185	182	172	176.32	164	189	1.166	0.221	1.951	0.0510613	0.0856677	1e-08	0.0102129	0.006694	0.006694	TRUE	0.1141	No
orf19.2075	3720	2481	3301	4044	3332	2879	3019	1780	3337	3159	3377	3335	2850	2747	2694	2511	3001.12	3302	2700	0.819	-0.289	-6.149	7.78524e-10	5.02943e-09	0.00137131	0.00246324	0.00177812	0.00177812	TRUE	0.0253534	No
orf19.2076	174	97	149	177	184	199	193	119	156	123	152	146	157	190	172	168	158.16	144	172	1.183	0.242	2.048	0.0405197	0.0698143	1e-08	0.0111582	0.00708032	0.00708032	TRUE	0.0830291	No
orf19.2077	3014	2043	2749	3175	3291	2852	3063	2069	2704	2601	2812	2618	2815	2721	2733	2918	2740.34	2684	2797	1.041	0.058	1.35	0.177078	0.248746	0.000692394	0.00250928	0.00139362	0.00139362	TRUE	0.0124398	No
orf19.2078	1195	871	1019	1294	1352	1238	1309	740	1072	1109	1043	1067	1156	1181	1168	1044	1104.98	1073	1137	1.064	0.09	1.665	0.095822	0.1475	0.000664442	0.00329331	0.00188673	0.00188673	TRUE	0.0321859	No
orf19.2079	3752	2322	2859	3757	4523	3582	3630	2955	3366	2956	2925	3098	3868	3418	3239	4168	3379.77	3086	3673	1.189	0.25	3.16	0.00157806	0.0038074	0.00834807	0.00240905	0.0056984	0.0056984	TRUE	0.0980691	No
orf19.2081	2093	1379	1925	2290	2518	2298	2486	1523	1878	1756	1969	1888	2153	2193	2218	2148	2025.45	1873	2178	1.162	0.217	4.848	1.24752e-06	5.18334e-06	0.000564554	0.00269625	0.00142279	0.00142279	TRUE	0.0196266	No
orf19.2082	7	2	3	3	4	4	1	3	6	3	3	2	3	4	1	4	3.34	4	3	0.829	-0.271	-0.353	0.724114	NA	1e-08	0.436454	0.261892	0.261892	TRUE	0.445483	No
orf19.2084	2282	1604	2180	2654	2196	1800	2087	1323	2047	2042	2230	2189	1878	1718	1862	1866	1979	2127	1831	0.86	-0.217	-4.311	1.62619e-05	5.7404e-05	0.00141854	0.00271308	0.00192956	0.00192956	TRUE	0.0214042	No
orf19.2087	756	540	582	793	902	761	833	570	678	687	595	654	771	726	743	804	707.48	654	761	1.163	0.218	3.334	0.000855695	0.00218488	0.00129915	0.00403146	0.00266658	0.00266658	TRUE	0.0412877	No
orf19.2088	693	414	513	649	695	516	620	382	622	527	525	535	594	492	553	539	548.44	552	544	0.986	-0.02	-0.244	0.806872	0.850173	0.00487881	0.00462647	0.0047587	0.0047587	TRUE	0.0864152	No
orf19.2089	3766	2710	3143	4182	3928	3486	3597	2257	3378	3450	3216	3449	3359	3326	3210	3183	3321.42	3373	3270	0.97	-0.044	-1.106	0.268574	0.352775	0.000480068	0.0024166	0.00121578	0.00121578	TRUE	0.0119248	No
orf19.209	276	197	250	318	350	304	269	218	248	251	256	262	299	290	240	307	269.16	254	284	1.114	0.155	1.595	0.110766	0.16637	0.00313741	0.0073729	0.00537953	0.00537953	TRUE	0.129501	No
orf19.2090	9689	6451	8786	10108	8730	7576	8205	4715	8692	8213	8989	8335	7466	7229	7322	6650	7861.95	8557	7167	0.838	-0.255	-5.391	7.01541e-08	3.51238e-07	0.0019243	0.00216417	0.00202174	0.00202174	TRUE	0.028013	No
orf19.2091	3661	2570	2986	3899	3481	3031	3331	2161	3284	3272	3055	3215	2977	2892	2972	3048	3089.47	3206	2972	0.926	-0.11	-2.818	0.00482959	0.0104525	0.000338228	0.00244941	0.00114272	0.00114272	TRUE	0.012183	No
orf19.2092	2855	1799	2364	2854	2851	2409	2570	1741	2561	2290	2419	2353	2438	2299	2293	2456	2388.66	2406	2372	0.984	-0.023	-0.468	0.639689	0.709873	0.0012202	0.00258727	0.00185522	0.00185522	TRUE	0.0231418	No
orf19.2093	3824	2500	3317	4069	3738	3094	3453	2388	3431	3183	3394	3355	3197	2952	3081	3368	3245.08	3341	3150	0.941	-0.087	-1.786	0.0740239	0.118236	0.00169944	0.00242688	0.00197624	0.00197624	TRUE	0.0250413	No
orf19.2094	4575	3262	4046	4871	6578	6162	6594	4214	4104	4153	4139	4017	5626	5880	5884	5943	4968.26	4103	5833	1.421	0.507	15.249	1.66063e-52	1.99541e-50	0.000258541	0.00227172	0.000854643	0.000854643	TRUE	0.00715284	No
orf19.2095	10121	6951	8987	10880	13608	11724	12599	8669	9080	8849	9195	8972	11638	11187	11243	12227	10298.7	9024	11574	1.282	0.358	9.568	1.09422e-21	2.2285e-20	0.000861225	0.00212048	0.00124757	0.00124757	TRUE	0.0172178	No
orf19.2097	724	475	633	747	701	615	703	402	650	605	648	616	600	587	627	567	612.31	630	595	0.947	-0.078	-1.252	0.210394	0.287349	1e-08	0.00435039	0.00213775	0.00213775	TRUE	0.0154252	No
orf19.2098	1745	1174	1582	2005	1986	1579	1793	1247	1565	1495	1619	1653	1698	1507	1600	1759	1611.98	1583	1641	1.034	0.049	0.826	0.408626	0.496868	0.00241065	0.00288009	0.00268931	0.00268931	TRUE	0.0363316	No
orf19.2099	1495	1027	1406	1646	1887	1552	1750	1128	1341	1307	1438	1357	1614	1481	1562	1591	1461.46	1361	1562	1.147	0.197	3.942	8.08867e-05	0.000250628	0.000804687	0.00297285	0.00171654	0.00171654	TRUE	0.0170667	No
orf19.21	582	391	475	592	630	532	573	428	522	498	486	488	539	508	511	604	519.43	498	540	1.079	0.109	1.494	0.135252	0.197663	0.00136219	0.00477433	0.00319335	0.00319335	TRUE	0.0627616	No
orf19.210	120	81	138	154	146	152	128	97	108	103	141	127	125	145	114	137	124.98	120	130	1.08	0.112	0.792	0.428463	0.515666	0.00778035	0.0135945	0.0110871	0.0110871	TRUE	0.137753	No
orf19.2101	984	632	755	984	1135	920	1009	631	883	805	772	811	971	878	900	890	863.76	818	910	1.113	0.154	2.479	0.0131574	0.0256989	0.00161558	0.0036602	0.00253693	0.00253693	TRUE	0.0350492	No
orf19.2102	4900	3292	4269	5309	4914	4087	4480	2726	4396	4191	4368	4378	4203	3900	3998	3845	4159.64	4333	3986	0.92	-0.12	-3.004	0.00266547	0.00612864	0.000702131	0.00232852	0.00128501	0.00128501	TRUE	0.0164866	No
orf19.2103	41	22	39	41	25	23	32	16	37	28	40	34	21	22	29	23	29.12	35	24	0.68	-0.556	-2.167	0.0302226	0.0539286	1e-08	0.0518346	0.0278643	0.0278643	TRUE	0.135844	No
orf19.2104	546	350	463	591	593	507	492	348	490	446	474	487	507	484	439	491	477.15	474	480	1.009	0.014	0.187	0.851501	0.88661	1e-08	0.00502195	0.00299345	0.00299345	TRUE	0.0416009	No
orf19.2105	1409	907	1235	1420	1134	966	1052	779	1264	1155	1264	1171	970	922	939	1099	1097.78	1214	982	0.806	-0.31	-4.755	1.98689e-06	8.02773e-06	0.00326985	0.00330192	0.00316096	0.00316096	TRUE	0.0690749	No
orf19.2106	1614	1105	1430	1745	1498	1128	1307	805	1448	1407	1463	1439	1281	1076	1166	1135	1301.97	1439	1164	0.81	-0.304	-5.199	2.00654e-07	9.43295e-07	0.00183217	0.00309452	0.00249735	0.00249735	TRUE	0.056703	No
orf19.2107	1053	690	850	1113	869	683	739	520	945	878	870	918	743	652	659	733	799.78	903	697	0.77	-0.377	-5.839	5.25852e-09	3.04953e-08	0.00176714	0.00379464	0.0027266	0.0027266	TRUE	0.0273912	No
orf19.2107.1	78725	46798	58582	75143	110649	78158	83372	44334	70625	59579	59935	61964	94630	74576	74396	62529	69779.2	63026	76533	1.214	0.28	2.019	0.0434951	0.0743862	0.0184887	0.00200033	0.00999196	0.0184887	TRUE	0.310572	No
orf19.2108	3371	2177	2741	3569	4061	3383	3667	2304	3024	2772	2804	2943	3473	3228	3272	3250	3095.73	2886	3306	1.145	0.195	4.379	1.19233e-05	4.29209e-05	0.000994744	0.00244846	0.00158658	0.00158658	TRUE	0.0145116	No
orf19.211	1457	919	1221	1528	1916	1627	1802	1232	1307	1170	1249	1260	1639	1552	1608	1738	1440.37	1246	1634	1.307	0.386	7.239	4.50831e-13	4.32405e-12	0.00122814	0.00298739	0.00202063	0.00202063	TRUE	0.0199389	No
orf19.2110	283	170	241	278	250	200	213	118	254	216	247	229	214	191	190	166	213.41	236	190	0.809	-0.307	-2.913	0.00358175	0.00797595	0.00201421	0.00878203	0.00592552	0.00592552	TRUE	0.0754998	No
orf19.2111	3762	2285	2996	3871	3763	2907	3351	2192	3375	2909	3065	3192	3218	2774	2990	3092	3076.88	3135	3018	0.962	-0.056	-0.931	0.352108	0.439806	0.00344185	0.00245133	0.00314845	0.00314845	TRUE	0.0365321	No
orf19.2111.2	6820	4434	5101	6849	6678	5169	5233	3337	6118	5645	5219	5648	5711	4932	4670	4707	5331.16	5658	5005	0.885	-0.176	-2.488	0.0128526	0.0251443	0.00655309	0.00225183	0.00464062	0.00464062	TRUE	0.11082	No
orf19.2112	807	494	688	962	1015	782	957	671	724	629	704	793	868	746	854	946	783.08	712	854	1.193	0.254	2.94	0.00328546	0.00739997	0.00744367	0.00383337	0.0058956	0.0058956	TRUE	0.0850006	No
orf19.2113	2197	1531	1932	2355	2533	2180	2340	1552	1971	1949	1977	1942	2166	2080	2088	2189	2045.26	1960	2131	1.086	0.12	3.065	0.00217972	0.00510955	1e-08	0.00268931	0.000970613	0.000970613	TRUE	0.00356402	No
orf19.2114	228	145	197	255	201	157	183	154	205	185	202	210	172	150	163	217	187.9	200	176	0.865	-0.209	-1.74	0.0819186	0.129148	0.00672471	0.00970558	0.00847348	0.00847348	TRUE	0.227248	No
orf19.2115	3600	2220	3124	3715	2784	2207	2510	1548	3230	2826	3196	3063	2381	2106	2240	2183	2653.17	3079	2228	0.723	-0.467	-8.278	1.25575e-16	1.68782e-15	0.00261002	0.00252668	0.00266869	0.00266869	TRUE	0.0358071	No
orf19.2116	2530	1607	2146	2546	2491	1970	2162	1317	2270	2046	2196	2099	2130	1880	1929	1858	2050.93	2153	1949	0.906	-0.142	-2.501	0.0123776	0.0243261	0.00245693	0.00268735	0.00261447	0.00261447	TRUE	0.0483167	No
orf19.2117	3148	1970	2583	3246	3896	3145	3511	2333	2824	2508	2643	2677	3332	3001	3133	3290	2925.97	2663	3189	1.196	0.258	5.056	4.27489e-07	1.9124e-06	0.00186448	0.00247567	0.00216305	0.00216305	TRUE	0.0201161	No
orf19.2119	7164	4353	6688	7938	8972	7230	8601	6332	6427	5542	6842	6546	7673	6899	7675	8931	7066.8	6339	7794	1.229	0.297	3.652	0.000259987	0.000742045	0.00952861	0.00218495	0.00622101	0.00622101	TRUE	0.116687	No
orf19.212	1695	1128	1389	1789	1767	1562	1724	1180	1521	1436	1421	1475	1511	1490	1538	1664	1507.16	1463	1551	1.057	0.08	1.587	0.112577	0.168501	0.000841807	0.00294273	0.00175635	0.00175635	TRUE	0.0262484	No
orf19.2123	1	0	0	0	1	0	2	0	1	0	0	0	1	0	2	0	0.44	0	1	2.306	1.205	0.558	0.576871	NA	1e-08	3.28544	2.75648	2.75648	TRUE	0.444812	No
orf19.2124	2540	1767	2189	2726	2947	2637	2731	1792	2279	2250	2240	2248	2520	2516	2437	2527	2377.08	2254	2500	1.109	0.149	4.135	3.54251e-05	0.000117653	1e-08	0.00259023	0.000821431	0.000821431	TRUE	0.00364842	No
orf19.2125	3834	2413	3096	3873	5095	3726	3907	3136	3439	3072	3168	3194	4357	3555	3486	4423	3586.85	3218	3955	1.228	0.297	3.652	0.000260386	0.000742829	0.00890785	0.00238425	0.00605153	0.00605153	TRUE	0.077829	No
orf19.2127	394	261	313	372	449	376	422	266	353	332	320	307	384	359	377	375	350.9	328	374	1.14	0.189	2.376	0.0174878	0.032988	1e-08	0.00611656	0.0031922	0.0031922	TRUE	0.0341636	No
orf19.2128	738	464	590	807	755	563	595	444	662	591	604	665	646	537	531	626	607.74	630	585	0.925	-0.113	-1.366	0.171995	0.242399	0.00544646	0.0043682	0.00492972	0.00492972	TRUE	0.0640321	No
orf19.2129	865	536	779	905	706	667	642	477	776	682	797	746	604	636	573	673	685.94	750	622	0.824	-0.279	-3.904	9.45737e-05	0.000290936	0.00263532	0.00409589	0.0034366	0.0034366	TRUE	0.0401038	No
orf19.213	2806	2297	2503	3432	2749	2736	2776	1906	2517	2924	2561	2830	2351	2611	2477	2688	2619.94	2708	2532	0.934	-0.098	-1.554	0.120177	0.178498	0.00393687	0.00253362	0.00342002	0.00342002	TRUE	0.0339449	No
orf19.2131	2093	1435	1959	2296	3005	2622	2809	1697	1878	1827	2004	1893	2570	2502	2507	2393	2196.74	1900	2493	1.313	0.392	8.877	6.83874e-19	1.13815e-17	0.00058646	0.00264037	0.00141184	0.00141184	TRUE	0.0158569	No
orf19.2132	1311	862	1113	1349	1510	1166	1277	787	1176	1097	1139	1112	1291	1113	1140	1110	1147.26	1131	1164	1.03	0.042	0.688	0.491557	0.576699	0.00238445	0.00324488	0.00275232	0.00275232	TRUE	0.0680971	No
orf19.2133	56	37	50	64	57	49	56	41	50	47	51	53	49	47	50	58	50.57	50	51	0.998	-0.003	-0.014	0.988835	0.991145	1e-08	0.0306854	0.0144879	0.0144879	TRUE	0.0508247	No
orf19.2135	1623	1070	1481	1678	1967	1721	1805	1156	1456	1362	1515	1384	1682	1642	1611	1630	1535.32	1429	1641	1.148	0.199	4.123	3.74417e-05	0.000123735	0.000606263	0.00292506	0.0015883	0.0015883	TRUE	0.0191155	No
orf19.2137	689	401	595	734	814	671	708	498	618	511	609	605	696	640	632	702	626.65	586	668	1.134	0.182	2.432	0.0150199	0.0289138	0.00308122	0.00429613	0.00377573	0.00377573	TRUE	0.0792991	No
orf19.2138	11832	7933	10727	12492	13730	11723	12719	8135	10615	10100	10975	10301	11742	11186	11350	11474	10967.7	10498	11438	1.089	0.124	3.417	0.000633417	0.00166327	0.000751976	0.00211188	0.00116485	0.00116485	TRUE	0.0113584	No
orf19.2143	4217	2852	3872	4601	4455	3651	4245	2821	3783	3631	3961	3794	3810	3484	3788	3979	3778.74	3792	3765	0.992	-0.012	-0.241	0.809474	0.852019	0.00156826	0.0023637	0.00203224	0.00203224	TRUE	0.0307368	No
orf19.2146	664	396	600	744	943	758	834	570	596	504	614	614	806	723	744	804	675.64	582	769	1.317	0.397	5.298	1.16974e-07	5.68131e-07	0.00355333	0.00412817	0.00387981	0.00387981	TRUE	0.0858416	No
orf19.2149	866	534	789	943	854	646	750	490	777	680	807	778	730	616	669	691	718.58	760	676	0.888	-0.171	-2.314	0.0206666	0.0383699	0.003713	0.00399975	0.00385027	0.00385027	TRUE	0.0554102	No
orf19.215	8469	5881	7603	9293	10232	8792	9481	6411	7598	7487	7779	7663	8751	8389	8460	9042	8146.07	7632	8660	1.134	0.182	5.21	1.89146e-07	8.91285e-07	0.000558001	0.00215773	0.00104235	0.00104235	TRUE	0.0103309	No
orf19.2150	1223	713	1012	1254	1079	842	907	639	1097	908	1035	1034	923	803	809	901	938.89	1018	859	0.841	-0.25	-3.406	0.00065865	0.00172275	0.00419553	0.00352571	0.00407522	0.00407522	TRUE	0.0604152	No
orf19.2151	9341	5834	8180	10068	12561	10014	11528	7117	8380	7427	8369	8302	10743	9555	10287	10038	9137.58	8120	10156	1.25	0.322	6.159	7.33644e-10	4.75484e-09	0.00266637	0.00213839	0.002522	0.002522	TRUE	0.0396925	No
orf19.2154	1960	1212	1680	2075	2297	1716	2033	1220	1758	1543	1719	1711	1964	1637	1814	1721	1733.48	1683	1784	1.06	0.084	1.28	0.200483	0.274938	0.00392784	0.00281697	0.00357381	0.00357381	TRUE	0.0570974	No
orf19.2156	1724	1026	1442	1772	2096	1576	1804	1201	1547	1306	1475	1461	1793	1504	1610	1694	1548.67	1447	1650	1.138	0.187	2.724	0.00644526	0.0135918	0.00435206	0.00291691	0.00387316	0.00387316	TRUE	0.049508	No
orf19.2157	3952	2357	3438	4243	5435	4302	4715	3257	3545	3001	3517	3499	4648	4105	4207	4594	3889.55	3390	4388	1.293	0.371	5.756	8.59817e-09	4.79646e-08	0.00453382	0.00235275	0.00372207	0.00372207	TRUE	0.0712399	No
orf19.2158	308	180	234	319	272	212	237	166	276	229	239	263	233	202	211	234	236.06	252	220	0.868	-0.205	-2.045	0.0408685	0.0703345	0.0019452	0.00812936	0.00539175	0.00539175	TRUE	0.046023	No
orf19.216	6510	4736	5669	7214	5434	4831	5353	3051	5840	6029	5800	5949	4647	4610	4777	4303	5244.38	5904	4584	0.777	-0.363	-9.184	4.1661e-20	7.53913e-19	0.000854594	0.00225633	0.00130836	0.00130836	TRUE	0.0196034	No
orf19.2160	55	32	51	54	44	14	27	21	49	41	52	45	38	13	24	30	36.44	47	26	0.559	-0.84	-3.038	0.00238539	0.00553124	0.0466361	0.0418221	0.0435673	0.0435673	TRUE	0.579206	No
orf19.216.1	2065	1302	1530	2148	2472	1853	1767	1275	1853	1658	1565	1771	2114	1768	1577	1798	1762.99	1712	1814	1.06	0.084	0.973	0.33078	0.417857	0.00942103	0.00280295	0.00652717	0.00652717	TRUE	0.152785	No
orf19.2163	1070	692	1051	1241	1074	945	1083	605	960	881	1075	1023	919	902	966	853	947.43	985	910	0.924	-0.114	-1.632	0.102632	0.156025	0.0035263	0.00351178	0.0036089	0.0036089	TRUE	0.0558964	No
orf19.2164.1	0	0	0	2	0	0	1	2	0	0	0	2	0	0	1	3	0.67	0	1	1.818	0.862	0.421	0.673515	NA	3.56836	2.16774	2.479	2.479	TRUE	0.824169	No
orf19.2165	1528	1363	1471	2032	1430	1650	1664	938	1371	1735	1505	1676	1223	1574	1485	1323	1486.47	1572	1401	0.892	-0.164	-1.785	0.0743186	0.118595	0.0110124	0.00295613	0.00745273	0.00745273	TRUE	0.0912528	No
orf19.2166	1357	1301	1352	1721	1339	1573	1587	980	1217	1656	1383	1419	1145	1501	1416	1382	1390.06	1419	1361	0.96	-0.059	-0.597	0.550634	0.631458	0.0139223	0.00302387	0.00869151	0.00869151	TRUE	0.149238	No
orf19.2167	11868	8539	9829	12922	9837	9265	9602	5517	10647	10871	10056	10656	8413	8840	8568	7781	9479.03	10558	8400	0.796	-0.329	-7.105	1.20397e-12	1.08938e-11	0.00183628	0.00213267	0.00195054	0.00195054	TRUE	0.0293708	No
orf19.2168	554	428	503	639	459	435	466	270	497	545	515	527	393	415	416	381	460.96	521	401	0.773	-0.371	-5.315	1.06482e-07	5.20962e-07	1e-08	0.00512882	0.0024851	0.0024851	TRUE	0.0112751	No
orf19.2168.3	2828	2180	2483	3215	2647	2487	2522	1765	2537	2775	2540	2651	2264	2373	2250	2489	2485.07	2626	2344	0.892	-0.165	-3.348	0.000812904	0.00208447	0.00153319	0.00256369	0.00192426	0.00192426	TRUE	0.0197461	No
orf19.2169	16	13	22	20	12	7	13	14	14	17	23	16	10	7	12	20	14.77	18	12	0.668	-0.583	-1.511	0.130851	NA	0.0190312	0.10024	0.0713274	0.0713274	TRUE	0.486992	No
orf19.217	141	98	126	178	138	131	121	67	126	125	129	147	118	125	108	94	121.55	132	111	0.849	-0.236	-1.782	0.0747615	0.119174	1e-08	0.0139223	0.00861133	0.00861133	TRUE	0.0786926	No
orf19.2170	6086	4375	5608	6680	6274	5988	6388	4084	5460	5570	5738	5508	5366	5714	5700	5760	5601.9	5569	5635	1.012	0.017	0.452	0.651425	0.720633	0.000507407	0.00223867	0.00110926	0.00110926	TRUE	0.0128812	No
orf19.2172	7990	5990	6724	8694	11777	11357	11125	6229	7168	7626	6879	7169	10072	10836	9927	8785	8557.93	7210	9905	1.374	0.459	7.416	1.20494e-13	1.20856e-12	0.0044076	0.00214916	0.00355671	0.00355671	TRUE	0.0699294	No
orf19.2173	10121	6904	8669	10845	13142	11478	12638	7630	9080	8790	8869	8943	11239	10952	11277	10761	9988.93	8920	11057	1.24	0.31	10.528	6.43571e-26	1.80166e-24	0.000206138	0.00212485	0.000731633	0.000731633	TRUE	0.00381728	No
orf19.2174	771	469	652	735	575	484	516	290	692	597	667	606	492	462	460	409	548.12	640	456	0.714	-0.486	-6.227	4.74975e-10	3.18488e-09	0.00330629	0.00462804	0.00396804	0.00396804	TRUE	0.0473771	No
orf19.2175	18359	12227	15719	19212	21385	18393	20029	12354	16470	15566	16082	15842	18289	17550	17873	17424	16887.1	15990	17784	1.112	0.153	4.912	9.00768e-07	3.81921e-06	0.000443376	0.00206549	0.000877591	0.000877591	TRUE	0.00500437	No
orf19.2176	1517	922	1309	1538	1796	1396	1636	980	1361	1174	1339	1268	1536	1332	1460	1382	1356.53	1286	1428	1.11	0.151	2.348	0.0188618	0.0352588	0.00312906	0.00304968	0.00321931	0.00321931	TRUE	0.0385874	No
orf19.2177	810	514	689	913	520	436	495	388	727	654	705	753	445	416	442	547	586.06	710	462	0.646	-0.629	-7.333	2.25322e-13	2.21561e-12	0.00616903	0.00445656	0.00527243	0.00527243	TRUE	0.15715	No
orf19.2178	3824	2621	3395	4262	3490	3007	3359	2511	3431	3337	3473	3514	2985	2869	2997	3542	3268.51	3439	3098	0.899	-0.153	-2.432	0.0150351	0.0289214	0.00455962	0.00242367	0.00348892	0.00348892	TRUE	0.109164	No
orf19.2178.1	894	532	716	874	836	666	660	399	802	677	733	721	715	635	589	563	679.34	733	626	0.855	-0.226	-2.693	0.00707463	0.014738	0.00620933	0.00411646	0.00530468	0.00530468	TRUE	0.111381	No
orf19.2179	14953	9638	13124	16307	11681	9583	10435	6393	13414	12270	13427	13447	9990	9144	9312	9017	11252.6	13140	9366	0.713	-0.488	-10.458	1.34844e-25	3.60064e-24	0.00192264	0.00210853	0.00200282	0.00200282	TRUE	0.0247683	No
orf19.2179.2	15016	9935	11944	15050	15850	12553	12815	8071	13471	12648	12220	12410	13555	11978	11435	11383	12387.7	12687	12088	0.953	-0.07	-1.156	0.247596	0.329542	0.00430956	0.00209671	0.00339591	0.00339591	TRUE	0.0819752	No
orf19.218	66	53	55	58	28	20	24	15	59	67	56	48	24	19	21	21	39.55	58	21	0.375	-1.415	-5.974	2.31883e-09	1.39875e-08	1e-08	0.0386869	0.0219898	0.0219898	TRUE	0.126157	No
orf19.2180	2386	1600	2223	2677	3070	2811	3147	2115	2140	2037	2274	2207	2626	2682	2808	2983	2469.78	2164	2775	1.279	0.355	6.624	3.48592e-11	2.70937e-10	0.00217604	0.00256731	0.00234931	0.00234931	TRUE	0.0294828	No
orf19.2181	33	29	37	30	23	27	19	12	30	37	38	25	20	26	17	17	26.05	32	20	0.625	-0.678	-2.389	0.0169085	0.0320562	1e-08	0.0576991	0.0368618	0.0368618	TRUE	0.224737	No
orf19.2182	6769	4768	6255	7542	7587	7146	7412	4787	6073	6070	6399	6219	6489	6818	6614	6752	6429.27	6190	6668	1.077	0.107	3.161	0.00157042	0.00379376	0.00035202	0.00220532	0.000936663	0.000936663	TRUE	0.00623497	No
orf19.2183	26463	17722	23196	28008	24152	20980	22497	15119	23740	22562	23732	23096	20656	20018	20075	21324	21900.3	23282	20518	0.881	-0.183	-5.405	6.49393e-08	3.26217e-07	0.000676863	0.00204581	0.00105209	0.00105209	TRUE	0.00840705	No
orf19.2184	244	145	165	227	234	182	201	135	219	185	169	187	200	174	179	190	187.88	190	186	0.976	-0.035	-0.309	0.757196	0.810049	0.00339947	0.00970627	0.00684898	0.00684898	TRUE	0.120058	No
orf19.2185	5648	3760	4686	5916	4931	4107	4640	2764	5067	4787	4794	4878	4217	3919	4140	3898	4462.64	4882	4044	0.829	-0.271	-6.654	2.85602e-11	2.23424e-10	0.000831129	0.00230482	0.00136465	0.00136465	TRUE	0.010196	No
orf19.2186	882	568	814	944	1090	917	1026	668	791	723	833	778	932	875	916	942	848.81	781	916	1.17	0.226	3.834	0.00012597	0.000378604	0.000618394	0.0036898	0.00215265	0.00215265	TRUE	0.0263131	No
orf19.2187	901	635	860	1030	835	707	859	562	808	808	880	849	714	675	767	793	786.73	836	737	0.878	-0.187	-2.856	0.00429241	0.00938798	0.00173631	0.00382477	0.00284156	0.00284156	TRUE	0.0376205	No
orf19.2190	709	402	682	789	1007	797	951	612	636	512	698	651	861	760	849	863	728.71	624	833	1.331	0.413	4.679	2.88326e-06	1.1374e-05	0.00794391	0.00397168	0.00606256	0.00606256	TRUE	0.160113	No
orf19.2191	1716	1135	1439	1852	1661	1359	1447	944	1539	1445	1472	1527	1421	1297	1291	1331	1415.46	1496	1335	0.892	-0.165	-3.286	0.00101588	0.00255265	0.000814281	0.00300512	0.00171737	0.00171737	TRUE	0.0240606	No
orf19.2191.1	221	150	204	231	251	199	194	172	198	191	209	190	215	190	173	243	201.08	197	205	1.032	0.046	0.398	0.69057	0.753394	0.00604955	0.00919891	0.00780141	0.00780141	TRUE	0.138816	No
orf19.2192	73577	51713	67481	80279	81189	72951	78116	50388	66006	65836	69040	66199	69435	69608	69706	71068	68362.2	66770	69954	1.048	0.067	2.513	0.011986	0.023663	0.000297261	0.00200076	0.000671223	0.000671223	TRUE	0.00641015	No
orf19.2193	8501	5502	7324	9077	9165	7676	8212	5366	7626	7005	7493	7485	7838	7324	7328	7568	7458.45	7402	7514	1.015	0.021	0.524	0.600261	0.676363	0.000961274	0.00217416	0.00142534	0.00142534	TRUE	0.015587	No
orf19.2194	830	621	694	895	984	903	928	583	745	791	710	738	842	862	828	822	792.1	746	838	1.127	0.172	3.07	0.00214068	0.00502979	1e-08	0.00381226	0.00175848	0.00175848	TRUE	0.0169183	No
orf19.2195	12	6	6	13	7	9	3	5	11	8	6	11	6	9	3	7	7.45	9	6	0.671	-0.576	-1.108	0.267681	NA	1e-08	0.196951	0.120387	0.120387	TRUE	0.402083	No
orf19.2196	639	468	588	752	983	939	1045	589	573	596	602	620	841	896	932	831	736.33	598	875	1.466	0.552	8.836	9.89908e-19	1.62496e-17	0.000956749	0.00395106	0.00233915	0.00233915	TRUE	0.0236844	No
orf19.2197	72	46	68	78	65	38	45	41	65	59	70	64	56	36	40	58	55.86	64	48	0.73	-0.455	-2.292	0.0219262	0.040558	0.00410937	0.027968	0.0194696	0.0194696	TRUE	0.200998	No
orf19.2198	4248	3011	3854	4744	3973	3634	3934	2495	3811	3833	3943	3912	3398	3467	3510	3519	3674.24	3875	3474	0.896	-0.159	-4.809	1.51462e-06	6.22424e-06	1e-08	0.00237463	0.000769653	0.000769653	TRUE	0.00271599	No
orf19.2199	4774	3445	4229	5208	3640	3281	3538	2438	4283	4386	4327	4295	3113	3131	3157	3439	3766.15	4323	3210	0.742	-0.431	-10.632	2.11365e-26	6.25557e-25	0.000839558	0.00236498	0.00130763	0.00130763	TRUE	0.0260505	No
orf19.22	4342	3025	3759	4712	3427	3108	3220	2059	3895	3851	3846	3886	2931	2966	2873	2904	3393.94	3870	2918	0.754	-0.407	-12.721	4.52607e-37	2.64006e-35	1e-08	0.00240726	0.000681532	0.000681532	TRUE	0.00146126	No
orf19.220	17645	12107	15556	19838	14471	12613	13578	9559	15829	15414	15915	16359	12376	12035	12116	13482	14190.8	15879	12502	0.787	-0.346	-7.954	1.80418e-15	2.17225e-14	0.00163509	0.00208182	0.00174258	0.00174258	TRUE	0.0334776	No
orf19.2200	1587	1090	1378	1681	1503	1372	1509	924	1424	1388	1410	1386	1285	1309	1347	1303	1356.46	1402	1311	0.935	-0.097	-2.21	0.0271198	0.0491214	1e-08	0.00304974	0.0010952	0.0010952	TRUE	0.00427185	No
orf19.2201	1050	730	899	1165	1142	1015	999	620	942	929	920	961	977	968	891	874	932.85	938	928	0.991	-0.013	-0.237	0.812738	0.855304	0.000651475	0.00353572	0.00198501	0.00198501	TRUE	0.0154262	No
orf19.2202	149	89	131	164	128	122	125	86	134	113	134	135	109	116	112	121	121.87	129	114	0.88	-0.184	-1.465	0.142903	0.206932	1e-08	0.0138915	0.00695532	0.00695532	TRUE	0.0573003	No
orf19.2203	10	4	4	5	3	5	5	3	9	5	4	4	3	5	4	4	4.79	6	4	0.71	-0.495	-0.785	0.432292	NA	1e-08	0.305141	0.166642	0.166642	TRUE	0.437248	No
orf19.2203.1	44	29	38	40	59	56	55	43	39	37	39	33	50	53	49	61	45.23	37	53	1.432	0.518	2.549	0.0107953	0.0215632	1e-08	0.0340726	0.0168323	0.0168323	TRUE	0.0517319	No
orf19.2204	7164	4684	6383	7775	6978	5840	6374	4202	6427	5963	6530	6411	5968	5572	5688	5927	6060.79	6333	5789	0.913	-0.131	-3.126	0.00177033	0.00422739	0.00110947	0.00221905	0.00150984	0.00150984	TRUE	0.0183246	No
orf19.2204.2	1277	865	1083	1376	1005	815	890	645	1146	1101	1108	1135	860	778	794	910	978.82	1122	836	0.741	-0.432	-7.284	3.23139e-13	3.15678e-12	0.00122688	0.00346263	0.00232304	0.00232304	TRUE	0.0372008	No
orf19.2208	5993	3923	5259	6401	7226	6154	6634	4384	5376	4994	5380	5278	6180	5872	5920	6183	5648.05	5257	6039	1.148	0.199	5.166	2.38913e-07	1.10755e-06	0.000737549	0.00223655	0.00124229	0.00124229	TRUE	0.0132907	No
orf19.2209	1318	1026	1277	1498	1356	1086	1289	743	1182	1306	1306	1235	1160	1036	1150	1048	1178.05	1257	1098	0.876	-0.191	-3.19	0.00142456	0.0034721	0.00208611	0.00321181	0.00257696	0.00257696	TRUE	0.0195621	No
orf19.2210	1768	1130	1583	1936	2050	1824	1985	1351	1586	1439	1620	1596	1753	1740	1771	1905	1676.39	1560	1792	1.145	0.196	3.729	0.000192074	0.000561274	0.00149619	0.00284549	0.00204741	0.00204741	TRUE	0.0308462	No
orf19.2211	7	9	11	16	11	13	9	9	6	11	11	13	9	12	8	13	10.59	10	10	0.996	-0.005	-0.012	0.990462	NA	1e-08	0.139059	0.079854	0.079854	TRUE	0.314726	No
orf19.2212	30	21	23	45	35	23	42	15	27	27	24	37	30	22	37	21	28.1	29	28	0.973	-0.039	-0.139	0.889609	0.916456	0.0250573	0.0536414	0.0415899	0.0415899	TRUE	0.385697	No
orf19.2213	181	133	142	222	125	129	152	88	162	169	145	183	107	123	136	124	143.72	165	122	0.74	-0.435	-3.432	0.000598968	0.00158414	1e-08	0.0120802	0.00831833	0.00831833	TRUE	0.0850603	No
orf19.2214	2096	1449	1755	2342	2492	2131	2307	1546	1880	1845	1796	1931	2131	2033	2059	2180	1981.94	1863	2101	1.126	0.171	3.889	0.000100622	0.000308279	0.000467928	0.00271199	0.00134434	0.00134434	TRUE	0.00768244	No
orf19.2215	4442	3130	4011	4992	5108	4387	4811	3150	3985	3985	4104	4116	4369	4186	4293	4443	4185.02	4048	4323	1.067	0.094	2.713	0.00666096	0.0140172	0.000163384	0.0023264	0.000903408	0.000903408	TRUE	0.00544678	No
orf19.2216	212	159	181	210	238	229	225	145	190	202	185	173	204	219	201	205	197.29	188	207	1.106	0.146	1.451	0.146791	0.211745	1e-08	0.00933785	0.00465039	0.00465039	TRUE	0.0318478	No
orf19.2219	3088	2166	2719	3450	3019	2689	3026	1971	2770	2758	2782	2845	2582	2566	2700	2780	2722.79	2789	2657	0.951	-0.072	-1.803	0.0713613	0.114581	0.000337172	0.00251269	0.00116867	0.00116867	TRUE	0.0107263	No
orf19.2220	363	255	301	415	285	266	226	161	326	325	308	342	244	254	202	227	278.34	325	232	0.712	-0.49	-5.181	2.207e-07	1.03108e-06	0.00202368	0.00719502	0.00490527	0.00490527	TRUE	0.0934626	No
orf19.2222	2861	1935	2553	3021	2727	2514	2842	1696	2567	2463	2612	2491	2332	2399	2536	2392	2474.03	2533	2415	0.953	-0.069	-1.625	0.104105	0.157738	0.000627351	0.0025663	0.00133513	0.00133513	TRUE	0.0144592	No
orf19.2227	162	114	144	174	146	158	131	88	145	145	147	143	125	151	117	124	137.24	145	129	0.89	-0.169	-1.375	0.169111	0.238951	1e-08	0.0125575	0.00716464	0.00716464	TRUE	0.135952	No
orf19.2228	131	149	140	149	195	226	203	146	118	190	143	123	167	216	181	206	167.85	144	192	1.351	0.434	2.824	0.00473837	0.010281	0.023546	0.0106284	0.0165529	0.0165529	TRUE	0.45034	No
orf19.2229	1334	882	1160	1491	1259	1083	1175	727	1197	1123	1187	1229	1077	1033	1048	1025	1114.98	1184	1046	0.883	-0.18	-3.597	0.00032131	0.000904608	1e-08	0.00328152	0.0015021	0.0015021	TRUE	0.0132037	No
orf19.223	8485	6190	7690	9285	10082	9243	9935	6231	7612	7881	7868	7657	8622	8819	8865	8788	8264.01	7754	8774	1.132	0.179	6.291	3.14605e-10	2.15034e-09	0.000120857	0.00215519	0.000652287	0.000652287	TRUE	0.00184389	No
orf19.2230	542	469	519	634	550	490	534	290	486	597	531	523	470	468	477	409	495.07	534	456	0.86	-0.218	-2.698	0.0069676	0.0145503	0.00340423	0.00491184	0.00424986	0.00424986	TRUE	0.0674549	No
orf19.2231	2024	1611	1820	2436	2191	2044	2094	1567	1816	2051	1862	2009	1874	1950	1869	2210	1955.04	1934	1976	1.02	0.028	0.435	0.663294	0.731339	0.00393937	0.00272207	0.00358306	0.00358306	TRUE	0.0736724	No
orf19.2232	13181	8606	10347	13037	12829	10735	10913	6754	11825	10956	10586	10750	10972	10243	9738	9526	10574.5	11029	10120	0.918	-0.124	-2.279	0.0226514	0.0417641	0.0031408	0.00211681	0.00274087	0.00274087	TRUE	0.0394095	No
orf19.2233	4845	3469	4217	5354	4739	4026	4291	2560	4346	4416	4314	4415	4053	3841	3829	3611	4103.29	4373	3834	0.878	-0.188	-4.587	4.50297e-06	1.72648e-05	0.000851772	0.00233331	0.00136927	0.00136927	TRUE	0.018075	No
orf19.2236	3430	2391	3018	3766	4447	4008	4436	2735	3077	3044	3088	3105	3803	3824	3958	3857	3469.71	3078	3860	1.254	0.326	9.928	3.13709e-23	7.08558e-22	1e-08	0.00239792	0.000744192	0.000744192	TRUE	0.00371419	No
orf19.2237	64	57	70	84	76	56	67	41	57	73	72	69	65	53	60	58	63.36	68	59	0.877	-0.189	-1.084	0.278333	0.362424	1e-08	0.0248901	0.0133114	0.0133114	TRUE	0.100421	No
orf19.2237.1	2654	2105	2228	3040	2362	2450	2452	1556	2381	2680	2279	2507	2020	2338	2188	2195	2323.43	2462	2185	0.888	-0.172	-2.754	0.00589124	0.0125335	0.00364941	0.00260433	0.00329172	0.00329172	TRUE	0.04162	No
orf19.2238	1077	912	957	1311	1040	1095	1113	658	966	1161	979	1081	889	1045	993	928	1005.36	1047	964	0.922	-0.117	-1.547	0.121939	0.180891	0.00507474	0.00342348	0.00445709	0.00445709	TRUE	0.0609414	No
orf19.2241	3174	2123	2754	3206	5701	4703	5235	3228	2847	2703	2818	2644	4876	4487	4671	4553	3699.85	2753	4647	1.689	0.756	17.49	1.70508e-68	3.79412e-66	0.000893462	0.00237189	0.0015035	0.0015035	TRUE	0.0136326	No
orf19.2242	9942	6870	8630	10680	10748	9808	10517	6796	8919	8746	8829	8807	9192	9358	9385	9585	9102.72	8825	9380	1.062	0.087	3.229	0.00124191	0.0030718	3.3887e-05	0.002139	0.000588546	0.000588546	TRUE	0.00250565	No
orf19.2244	1338	964	1204	1398	805	711	788	549	1200	1227	1232	1153	688	678	703	774	957.07	1203	711	0.589	-0.763	-13.32	1.76475e-40	1.21869e-38	0.000595606	0.00349634	0.00202619	0.00202619	TRUE	0.0361612	No
orf19.2245	788	581	685	825	642	597	603	365	707	740	701	680	549	570	538	515	624.91	707	543	0.771	-0.375	-6.04	1.54574e-09	9.56416e-09	1e-08	0.00430257	0.00206911	0.00206911	TRUE	0.0121006	No
orf19.2246	1295	877	1045	1346	1003	876	896	505	1162	1117	1069	1110	858	836	800	712	957.85	1114	802	0.722	-0.47	-7.397	1.38826e-13	1.37862e-12	0.0023458	0.00349511	0.00280387	0.00280387	TRUE	0.0582805	No
orf19.2247	130	98	140	137	102	96	90	81	117	125	143	113	87	92	80	114	108.87	124	93	0.743	-0.428	-2.895	0.00379721	0.00841832	0.00626126	0.0153135	0.0115816	0.0115816	TRUE	0.173467	No
orf19.2248	1242	929	1106	1419	1205	1128	1244	804	1114	1183	1132	1170	1031	1076	1110	1134	1118.69	1150	1088	0.945	-0.082	-1.589	0.112103	0.167917	0.000344664	0.00327721	0.00164961	0.00164961	TRUE	0.0154523	No
orf19.2249	390	271	305	394	361	273	328	202	350	345	312	325	309	260	293	285	309.83	333	287	0.863	-0.213	-2.445	0.014467	0.0279658	1e-08	0.006665	0.00402507	0.00402507	TRUE	0.0459833	No
orf19.225	3157	2028	2772	3367	3602	3276	3568	2043	2832	2582	2836	2776	3081	3126	3184	2881	2912.28	2756	3068	1.113	0.155	3.257	0.00112594	0.00280575	0.00139862	0.002478	0.00182199	0.00182199	TRUE	0.0210276	No
orf19.2250	4817	3210	3957	4971	4273	3530	3599	2541	4321	4087	4048	4099	3654	3368	3212	3584	3796.69	4139	3454	0.834	-0.262	-5.295	1.18949e-07	5.76794e-07	0.00181182	0.00236188	0.00207788	0.00207788	TRUE	0.0277109	No
orf19.2251	9039	6440	7767	9797	9027	7569	7943	5390	8109	8199	7946	8079	7720	7222	7088	7602	7745.63	8083	7408	0.916	-0.126	-3.38	0.000725735	0.00188346	0.000737803	0.00216694	0.00120652	0.00120652	TRUE	0.0104643	No
orf19.2252	3	5	7	6	5	8	3	3	3	6	7	5	4	8	3	4	5	5	5	0.903	-0.147	-0.234	0.814888	NA	1e-08	0.292436	0.175003	0.175003	TRUE	0.371764	No
orf19.2253	313	217	336	347	273	201	231	152	281	276	344	286	233	192	206	214	254.09	297	211	0.713	-0.488	-4.645	3.4041e-06	1.3315e-05	0.00532299	0.00769281	0.00656522	0.00656522	TRUE	0.12622	No
orf19.2256	4452	2774	3578	4398	4175	3294	3645	2261	3994	3532	3661	3627	3571	3143	3253	3189	3495.99	3704	3289	0.888	-0.171	-3.074	0.00210857	0.00496017	0.0028204	0.00239477	0.00268184	0.00268184	TRUE	0.0411402	No
orf19.2257	1739	1224	1580	1945	1604	1403	1507	898	1560	1558	1616	1604	1372	1339	1345	1267	1457.56	1584	1331	0.841	-0.25	-5.554	2.78612e-08	1.46192e-07	1e-08	0.0029755	0.001248	0.001248	TRUE	0.0108661	No
orf19.2258	1165	806	1039	1194	1115	1015	1138	602	1045	1026	1063	985	954	968	1015	849	988.18	1030	946	0.923	-0.116	-1.871	0.0612996	0.100406	0.0019315	0.00344859	0.00266013	0.00266013	TRUE	0.0508305	No
orf19.2259	1877	1218	1470	1898	1951	1698	1774	1044	1684	1551	1504	1565	1669	1620	1583	1472	1580.97	1576	1586	1.008	0.011	0.202	0.83957	0.877393	0.00184726	0.00289776	0.00228864	0.00228864	TRUE	0.0261881	No
orf19.2260	2569	1706	2159	2690	2216	1976	2275	1293	2305	2172	2209	2218	1895	1885	2030	1824	2067.25	2226	1908	0.858	-0.221	-4.805	1.54728e-06	6.34111e-06	0.000707474	0.00268176	0.00153634	0.00153634	TRUE	0.0223822	No
orf19.2261	2004	1461	1767	2126	1930	1745	1848	1167	1798	1860	1808	1753	1651	1665	1649	1646	1728.67	1805	1653	0.917	-0.125	-3.083	0.00204591	0.00482032	1e-08	0.0028193	0.000998881	0.000998881	TRUE	0.00475621	No
orf19.2262	2418	1732	2047	2554	2957	2610	2879	1698	2169	2205	2094	2106	2529	2490	2569	2395	2319.72	2144	2496	1.167	0.222	5.479	4.28183e-08	2.19311e-07	0.000167951	0.00260533	0.00114521	0.00114521	TRUE	0.00813496	No
orf19.2263	864	592	734	985	875	789	838	539	775	754	751	812	748	753	748	760	762.64	773	752	0.971	-0.043	-0.767	0.44309	0.529768	1e-08	0.00388304	0.00165617	0.00165617	TRUE	0.0147207	No
orf19.2264	5847	3928	4985	5928	5565	4724	5115	3406	5245	5001	5100	4888	4759	4507	4564	4804	4858.7	5058	4658	0.92	-0.12	-3.082	0.00205402	0.00483754	0.000657857	0.00227831	0.00123612	0.00123612	TRUE	0.00770993	No
orf19.2265	2308	1572	1964	2525	2284	2001	2199	1487	2071	2001	2009	2082	1953	1909	1962	2097	2010.69	2041	1980	0.968	-0.047	-1.08	0.280133	0.364302	0.000382773	0.00270151	0.00131611	0.00131611	TRUE	0.0171079	No
orf19.2266	1524	1037	1394	1689	1425	1305	1294	866	1367	1320	1426	1393	1219	1245	1155	1221	1293.29	1376	1210	0.878	-0.188	-3.869	0.000109122	0.000332288	4.35597e-06	0.00310201	0.0014928	0.0014928	TRUE	0.0119896	No
orf19.2267	2705	1826	2219	2873	2681	2058	2194	1545	2427	2325	2270	2369	2293	1964	1958	2179	2223.02	2348	2098	0.893	-0.163	-2.76	0.00578342	0.0123259	0.00291163	0.00263255	0.00289378	0.00289378	TRUE	0.0496504	No
orf19.2268	7186	4847	6436	7876	7054	6247	6832	4505	6447	6171	6585	6495	6033	5961	6096	6354	6267.56	6424	6111	0.95	-0.074	-2.047	0.040616	0.0699601	0.000564997	0.00221114	0.0010788	0.0010788	TRUE	0.00830628	No
orf19.2269	731	528	587	831	689	699	654	409	656	672	601	685	589	667	584	577	628.81	654	604	0.925	-0.112	-1.563	0.118128	0.175889	0.00244501	0.00428818	0.00333334	0.00333334	TRUE	0.0582415	No
orf19.227	2296	2003	2046	2980	2901	2558	2673	1582	2060	2550	2093	2457	2481	2441	2385	2231	2337.33	2290	2384	1.042	0.06	0.813	0.416237	0.504286	0.00587124	0.00260062	0.00480696	0.00480696	TRUE	0.0687467	No
orf19.2270	8309	5981	7502	9567	8753	7895	8530	5228	7454	7614	7675	7889	7486	7533	7612	7374	7579.63	7658	7501	0.98	-0.03	-0.966	0.334179	0.421	0.000188299	0.00217105	0.000775301	0.000775301	TRUE	0.00520365	No
orf19.2272	2813	1868	2602	3137	2942	2668	3017	1954	2524	2378	2662	2587	2516	2546	2692	2756	2582.57	2538	2628	1.034	0.048	0.961	0.336738	0.423691	0.00157077	0.00254164	0.00197796	0.00197796	TRUE	0.0206021	No
orf19.2274	46	26	49	75	49	53	57	36	41	33	50	62	42	51	51	51	47.56	46	49	1.025	0.035	0.159	0.873594	0.90352	0.0178873	0.0325047	0.026377	0.026377	TRUE	0.350018	No
orf19.2275	1327	911	1007	1325	1519	1271	1361	931	1190	1160	1030	1093	1299	1213	1214	1313	1189.07	1118	1260	1.126	0.171	2.866	0.00415254	0.00911192	0.00207603	0.0032004	0.00256984	0.00256984	TRUE	0.0330244	No
orf19.2276	1244	779	993	1280	1020	824	846	475	1116	992	1016	1056	872	786	755	670	907.83	1045	771	0.74	-0.435	-5.604	2.0991e-08	1.11507e-07	0.0057276	0.00357862	0.00464896	0.00464896	TRUE	0.0933207	No
orf19.2277	1757	1166	1548	1900	2187	1956	2155	1416	1576	1484	1584	1567	1870	1866	1923	1997	1733.5	1553	1914	1.23	0.298	6.723	1.77658e-11	1.41373e-10	0.000170829	0.00281696	0.00130432	0.00130432	TRUE	0.00959864	No
orf19.2278	2381	1645	2147	2626	2482	2255	2357	1588	2136	2094	2197	2165	2123	2152	2103	2240	2151.2	2148	2154	1.001	0.001	0.033	0.97372	0.981398	1e-08	0.00265436	0.00105908	0.00105908	TRUE	0.00771427	No
orf19.2280	873	620	892	921	727	653	732	458	783	789	913	759	622	623	653	646	723.57	811	636	0.784	-0.351	-5.004	5.61147e-07	2.46987e-06	0.00274215	0.00398583	0.00330598	0.00330598	TRUE	0.084436	No
orf19.2281	99	63	83	98	125	99	107	60	89	80	85	81	107	94	95	85	89.53	84	95	1.147	0.197	1.354	0.175724	0.247033	1e-08	0.0181947	0.00928499	0.00928499	TRUE	0.0662998	No
orf19.2282	949	615	816	924	1179	1030	1047	618	851	783	835	762	1008	983	934	872	878.52	808	949	1.178	0.236	3.662	0.000250095	0.000715851	0.00218771	0.00363197	0.00285563	0.00285563	TRUE	0.0322659	No
orf19.2283	1768	1149	1468	1808	1933	1515	1650	1115	1586	1463	1502	1491	1653	1446	1472	1573	1523.17	1510	1536	1.016	0.023	0.408	0.683259	0.746774	0.00196784	0.0029326	0.00236242	0.00236242	TRUE	0.0341522	No
orf19.2284	1495	943	1243	1619	1792	1466	1613	1136	1341	1201	1272	1335	1533	1399	1439	1602	1390.18	1287	1493	1.156	0.21	3.543	0.000395568	0.00109167	0.00222582	0.00302378	0.00263725	0.00263725	TRUE	0.026712	No
orf19.2285	116	87	110	121	111	108	112	70	104	111	113	100	95	103	100	99	102.97	107	99	0.932	-0.102	-0.765	0.444286	0.530987	1e-08	0.0160772	0.00746193	0.00746193	TRUE	0.0213196	No
orf19.2286	5425	3597	4636	5845	5580	4521	4802	3309	4867	4579	4743	4820	4772	4314	4285	4667	4630.89	4752	4510	0.948	-0.077	-1.645	0.0998837	0.152704	0.00155965	0.002293	0.00186761	0.00186761	TRUE	0.01957	No
orf19.2287	1961	1469	1680	2057	1802	1401	1536	1042	1759	1870	1719	1696	1541	1337	1371	1470	1595.33	1761	1430	0.812	-0.3	-5.154	2.5508e-07	1.17977e-06	0.00224847	0.00288949	0.00261514	0.00261514	TRUE	0.0356959	No
orf19.2288	4974	3141	4315	5082	5162	4275	4932	2885	4462	3999	4415	4191	4415	4079	4401	4069	4253.77	4267	4241	0.994	-0.008	-0.17	0.865282	0.89755	0.00173902	0.0023208	0.00214419	0.00214419	TRUE	0.0210596	No
orf19.2289	1107	719	929	1265	1312	1199	1189	842	993	915	950	1043	1122	1144	1061	1188	1052.09	975	1129	1.152	0.205	3.447	0.000567874	0.00151232	0.00166153	0.00335935	0.00242434	0.00242434	TRUE	0.026583	No
orf19.229	1925	1463	1719	2213	1953	1910	1896	1086	1727	1863	1759	1825	1670	1822	1692	1532	1736.17	1794	1679	0.938	-0.092	-1.609	0.107586	0.162284	0.00233532	0.00281567	0.00253773	0.00253773	TRUE	0.038957	No
orf19.2290	4146	3001	3867	4618	6307	5542	6064	3802	3719	3821	3956	3808	5394	5288	5411	5362	4594.98	3826	5364	1.402	0.488	14.843	7.76162e-50	8.03997e-48	7.97399e-05	0.00229546	0.000812703	0.000812703	TRUE	0.006427	No
orf19.2296	83635	54658	74020	88951	101341	82301	92018	62502	75029	69585	75730	73350	86670	78529	82111	88153	78644.7	73424	83866	1.142	0.192	4.137	3.51727e-05	0.000116879	0.00205255	0.00199798	0.00205141	0.00205141	TRUE	0.0224859	No
orf19.2297	216	142	196	218	228	198	233	145	194	181	201	180	195	189	208	205	193.9	189	199	1.053	0.075	0.744	0.456937	0.542545	1e-08	0.00946643	0.00459388	0.00459388	TRUE	0.0184247	No
orf19.2298	1226	773	1041	1351	1555	1439	1412	1060	1100	984	1065	1114	1330	1373	1260	1495	1215.13	1066	1364	1.275	0.351	5.448	5.08056e-08	2.58459e-07	0.00299403	0.00317422	0.00313603	0.00313603	TRUE	0.0464668	No
orf19.2299	1279	842	1018	1301	905	682	779	492	1147	1072	1042	1073	774	651	695	694	893.43	1084	704	0.65	-0.622	-9.528	1.59867e-21	3.22308e-20	0.00232699	0.00360438	0.00291502	0.00291502	TRUE	0.0576573	No
orf19.23	3719	2492	3349	4085	3901	3437	3770	2275	3336	3173	3426	3369	3336	3279	3364	3209	3311.54	3326	3297	0.991	-0.013	-0.328	0.742562	0.798517	0.000349546	0.0024179	0.0010974	0.0010974	TRUE	0.0109798	No
orf19.230	511	477	527	626	670	811	691	405	458	607	539	516	573	774	617	571	581.97	530	634	1.199	0.262	2.355	0.018527	0.0347084	0.015851	0.004474	0.0101245	0.0101245	TRUE	0.262882	No
orf19.2301	2163	1448	1786	2245	2001	1714	1891	1101	1940	1843	1827	1851	1711	1635	1687	1553	1756.18	1865	1646	0.884	-0.178	-3.817	0.000134854	0.000402685	0.000517171	0.00280615	0.00150457	0.00150457	TRUE	0.0159156	No
orf19.2302	1182	820	1100	1209	945	861	1002	616	1060	1044	1125	997	808	822	894	869	952.42	1056	848	0.802	-0.318	-5.3	1.16002e-07	5.64324e-07	0.00149259	0.00350375	0.00238164	0.00238164	TRUE	0.0231159	No
orf19.2303	306	187	250	306	233	225	211	153	275	238	256	252	199	215	188	216	229.84	255	204	0.796	-0.329	-3.407	0.000657683	0.00172098	1e-08	0.00829565	0.00453279	0.00453279	TRUE	0.0318646	No
orf19.2304	656	494	540	700	778	709	710	544	589	629	552	577	665	677	634	767	636.23	587	686	1.165	0.221	3.019	0.00253782	0.0058598	0.0028649	0.00426126	0.00355367	0.00355367	TRUE	0.0677502	No
orf19.2305	437	314	367	447	499	398	399	239	392	400	375	369	427	380	356	337	379.44	384	375	0.982	-0.026	-0.295	0.767889	0.819155	0.00324658	0.00580543	0.00456254	0.00456254	TRUE	0.102506	No
orf19.2306	649	478	554	691	702	625	666	341	582	609	567	570	600	596	594	481	574.92	582	568	0.983	-0.025	-0.327	0.74371	0.799179	0.00324122	0.00450458	0.0039361	0.0039361	TRUE	0.108387	No
orf19.2307	1676	1168	1462	1800	2298	1945	2264	1328	1504	1487	1496	1484	1965	1856	2020	1873	1710.63	1493	1928	1.294	0.371	8.286	1.16753e-16	1.58341e-15	0.000396328	0.00282816	0.00133348	0.00133348	TRUE	0.0124623	No
orf19.2308	28512	20799	24690	32197	30929	28640	30843	19118	25578	26479	25260	26550	26451	27327	27522	26964	26516.7	25967	27066	1.042	0.06	1.998	0.045669	0.0777058	0.000410587	0.00203427	0.000823994	0.000823994	TRUE	0.00409709	No
orf19.2309	5875	4132	5303	6189	5332	4940	5377	3548	5270	5260	5425	5104	4560	4714	4798	5004	5016.99	5265	4769	0.905	-0.144	-3.626	0.000287296	0.000814955	0.000799201	0.00226888	0.00130779	0.00130779	TRUE	0.0127731	No
orf19.2309.2	28800	18529	24199	30270	30325	24404	25995	17536	25837	23589	24758	24961	25935	23286	23196	24733	24536.8	24786	24288	0.98	-0.029	-0.629	0.529441	0.61226	0.00189764	0.00203869	0.00207197	0.00207197	TRUE	0.025701	No
orf19.231	562	525	535	670	725	739	773	418	504	668	547	552	620	705	690	590	609.61	568	651	1.152	0.204	2.199	0.0279006	0.0502177	0.00905825	0.00436087	0.00662087	0.00662087	TRUE	0.155982	No
orf19.2310	1000	698	907	1079	1102	1055	1135	720	897	889	928	890	942	1007	1013	1015	947.61	901	994	1.102	0.141	2.69	0.00715344	0.0148918	1e-08	0.00351149	0.00156797	0.00156797	TRUE	0.015711	No
orf19.2310.1	9669	5778	7574	9652	9479	7163	7316	5824	8674	7356	7749	7959	8107	6835	6528	8214	7677.78	7934	7421	0.935	-0.097	-1.218	0.223267	0.302182	0.0087962	0.0021686	0.00597996	0.00597996	TRUE	0.0802434	No
orf19.2311	15816	10431	13785	16776	14631	12221	13426	9909	14189	13280	14103	13834	12513	11661	11980	13976	13191.9	13852	12532	0.904	-0.145	-2.563	0.0103868	0.0208222	0.00367701	0.00208957	0.00299822	0.00299822	TRUE	0.0727727	No
orf19.2312	79	48	76	73	69	46	65	47	71	61	78	60	59	44	58	66	62.14	68	57	0.835	-0.26	-1.399	0.161682	0.229859	1e-08	0.025341	0.0169819	0.0169819	TRUE	0.199999	No
orf19.2313	1326	942	1172	1476	1326	1173	1215	884	1190	1199	1199	1217	1134	1119	1084	1247	1173.66	1201	1146	0.951	-0.073	-1.368	0.171245	0.241456	0.000792471	0.00321642	0.00186058	0.00186058	TRUE	0.0371784	No
orf19.2314	8144	5526	6573	8289	7229	6271	6724	4081	7306	7035	6725	6835	6182	5984	6000	5756	6477.91	6975	5980	0.858	-0.221	-5.599	2.16191e-08	1.1464e-07	0.000889031	0.00220362	0.00134257	0.00134257	TRUE	0.0126621	No
orf19.2315	2516	1685	2224	2721	3416	2831	3249	2193	2257	2145	2275	2244	2921	2701	2899	3093	2567.05	2230	2904	1.3	0.378	7.788	6.78691e-15	7.75205e-14	0.00133781	0.00254504	0.00186671	0.00186671	TRUE	0.0264817	No
orf19.2317	94	50	76	105	101	77	67	54	84	64	78	87	86	73	60	76	76.02	78	74	0.939	-0.091	-0.53	0.595937	0.672816	0.00758152	0.0210771	0.015483	0.015483	TRUE	0.170714	No
orf19.2318.1	1614	1175	1374	1780	1527	1269	1357	922	1448	1496	1406	1468	1306	1211	1211	1300	1355.68	1454	1257	0.864	-0.211	-4.305	1.67183e-05	5.88767e-05	0.000439606	0.00305035	0.0015694	0.0015694	TRUE	0.00957965	No
orf19.2319	6666	4422	5880	6914	7428	6436	7092	3844	5980	5630	6016	5701	6353	6141	6328	5422	5946.34	5832	6061	1.04	0.057	1.032	0.301956	0.387888	0.00292725	0.00222366	0.00271728	0.00271728	TRUE	0.0600687	No
orf19.232	277	211	249	316	384	395	418	277	248	269	255	261	328	377	373	391	312.68	258	367	1.42	0.506	5.836	5.34239e-09	3.08626e-08	1e-08	0.0066223	0.00390781	0.00390781	TRUE	0.0615418	No
orf19.2320	10585	7046	8869	11166	10101	8433	9526	4994	9496	8970	9074	9208	8639	8047	8500	7044	8622.1	9187	8058	0.877	-0.189	-3.098	0.00195126	0.00461725	0.00416211	0.00214789	0.00344239	0.00344239	TRUE	0.0863445	No
orf19.2322.3	1173	816	1022	1248	1122	930	1025	613	1052	1039	1046	1029	960	887	915	865	974.01	1042	907	0.873	-0.196	-3.752	0.00017555	0.000516046	1e-08	0.00346997	0.00159969	0.00159969	TRUE	0.018837	No
orf19.2324	2005	1398	1814	2226	1697	1393	1507	1115	1799	1780	1856	1836	1451	1329	1345	1573	1620.98	1818	1424	0.782	-0.355	-6.192	5.955e-10	3.9144e-09	0.00247565	0.00287509	0.00253467	0.00253467	TRUE	0.0540827	No
orf19.2325	832	568	726	911	952	795	927	607	746	723	743	751	814	759	827	856	777.45	741	814	1.096	0.132	2.28	0.0226078	0.0417162	1e-08	0.00384679	0.00191295	0.00191295	TRUE	0.0246354	No
orf19.2326	2602	1614	2168	2733	2812	2444	2731	1548	2334	2055	2218	2254	2405	2332	2437	2183	2277.25	2215	2339	1.056	0.079	1.486	0.137237	0.199933	0.00198428	0.002617	0.00226832	0.00226832	TRUE	0.0274844	No
orf19.2328	1924	1398	1661	2141	2428	2099	2363	1393	1726	1780	1699	1765	2077	2003	2109	1965	1890.41	1742	2038	1.171	0.228	5.363	8.17021e-08	4.05005e-07	0.000194128	0.00274745	0.00120749	0.00120749	TRUE	0.00640613	No
orf19.2329.1	17099	11789	13137	17264	15691	13976	13706	8625	15340	15009	13440	14236	13419	13335	12230	12165	13646.9	14506	12787	0.882	-0.182	-3.373	0.000743408	0.00192434	0.00303406	0.0020859	0.00271192	0.00271192	TRUE	0.0298868	No
orf19.2330	6296	4151	5388	6571	5895	5040	5533	3286	5648	5285	5512	5419	5042	4809	4937	4635	5160.79	5466	4856	0.889	-0.17	-4.324	1.53375e-05	5.44285e-05	0.000786176	0.00226082	0.00128979	0.00128979	TRUE	0.0108693	No
orf19.2331	1280	889	1120	1395	1727	1573	1774	1026	1148	1132	1146	1150	1477	1501	1583	1447	1323.03	1144	1502	1.314	0.394	8.333	7.9104e-17	1.10459e-15	1e-08	0.00307678	0.00137864	0.00137864	TRUE	0.0161366	No
orf19.233.1	1995	1438	1719	2079	2106	1818	1766	1177	1790	1831	1759	1714	1801	1735	1576	1660	1733.15	1774	1693	0.956	-0.065	-1.244	0.213328	0.29076	0.00153961	0.00281713	0.00204838	0.00204838	TRUE	0.0279281	No
orf19.2332	0	1	0	1	1	2	0	1	0	1	0	1	1	2	0	1	0.78	0	1	2.07	1.05	0.642	0.520904	NA	1e-08	1.85373	1.13943	1.13943	TRUE	0.265504	No
orf19.2333	8195	5258	7130	8684	9513	8095	9249	5565	7352	6694	7295	7161	8136	7724	8253	7849	7557.92	7126	7990	1.121	0.165	3.973	7.08729e-05	0.000222817	0.00117339	0.0021716	0.00152354	0.00152354	TRUE	0.0197787	No
orf19.2334	768	571	651	891	943	959	883	526	689	727	666	735	806	915	788	742	758.5	704	813	1.157	0.21	2.883	0.00393392	0.00869253	0.00366707	0.00389343	0.00377297	0.00377297	TRUE	0.084342	No
orf19.2335	1089	792	969	1200	1251	1210	1298	769	977	1008	991	990	1070	1155	1158	1085	1054.18	992	1117	1.128	0.174	3.397	0.000681127	0.00177613	1e-08	0.00335661	0.00156117	0.00156117	TRUE	0.0110541	No
orf19.2336	250	168	202	263	229	195	190	136	224	214	207	217	196	186	170	192	200.62	216	186	0.86	-0.217	-2.178	0.0293982	0.0525981	1e-08	0.00921556	0.00455422	0.00455422	TRUE	0.0408269	No
orf19.2337	14287	9555	12822	15334	14599	12810	13661	7770	12817	12165	13118	12645	12486	12223	12190	10959	12325.2	12686	11964	0.943	-0.084	-1.774	0.0760668	0.121126	0.00201681	0.00209731	0.00207397	0.00207397	TRUE	0.038525	No
orf19.234	572	476	542	662	727	653	719	469	513	606	555	546	622	623	642	661	595.93	555	637	1.15	0.202	3.008	0.00263358	0.00606005	0.00058314	0.00441554	0.00262526	0.00262526	TRUE	0.0404991	No
orf19.2340	21446	14038	18606	23039	21992	17998	19671	12859	19239	17872	19036	18998	18808	17173	17553	18136	18352	18786	17918	0.954	-0.069	-1.689	0.0911677	0.141534	0.00126308	0.00205863	0.00152591	0.00152591	TRUE	0.0138549	No
orf19.2341	4283	3133	3718	4766	5624	4982	5407	3320	3842	3989	3804	3930	4810	4754	4825	4683	4329.48	3891	4768	1.226	0.294	9.094	9.5824e-20	1.68336e-18	1.18123e-05	0.00231483	0.000771367	0.000771367	TRUE	0.00318174	No
orf19.2342	1829	1251	1535	2023	1949	1623	1750	992	1641	1593	1570	1668	1667	1549	1562	1399	1581.04	1618	1544	0.956	-0.065	-1.14	0.254334	0.336944	0.00207983	0.00289772	0.00245974	0.00245974	TRUE	0.0442034	No
orf19.2343	216	172	207	263	270	267	253	195	194	219	212	217	231	255	226	275	228.48	210	247	1.167	0.222	2.217	0.0265992	0.0483242	1e-08	0.00833315	0.0052523	0.0052523	TRUE	0.0561506	No
orf19.2343.1	429	298	365	490	369	312	345	241	385	379	373	404	316	298	308	340	350.35	385	316	0.813	-0.298	-3.801	0.000144065	0.000428064	1e-08	0.00612313	0.00302315	0.00302315	TRUE	0.0252487	No
orf19.2344	1677	1073	1487	1791	2352	1820	1963	1502	1504	1366	1521	1477	2012	1737	1752	2118	1685.86	1467	1905	1.295	0.373	5.205	1.94325e-07	9.14971e-07	0.00532756	0.00284063	0.00433789	0.00433789	TRUE	0.0659963	No
orf19.2346	1601	1082	1364	1560	989	891	962	692	1436	1378	1396	1286	846	850	858	976	1128.26	1374	882	0.64	-0.643	-10.447	1.51407e-25	4.00728e-24	0.00232734	0.00326619	0.00270229	0.00270229	TRUE	0.0539688	No
orf19.2347	3241	2261	2924	3479	2887	2579	2664	1745	2908	2878	2992	2869	2469	2461	2377	2461	2676.82	2912	2442	0.839	-0.254	-6.986	2.83749e-12	2.46353e-11	1e-08	0.00252185	0.000892556	0.000892556	TRUE	0.00411446	No
orf19.2350	506	339	442	558	528	413	437	277	454	432	452	460	452	394	390	391	428.02	450	407	0.906	-0.143	-1.882	0.0598175	0.0982458	1e-08	0.00537122	0.00321374	0.00321374	TRUE	0.0687826	No
orf19.2351	848	541	711	852	1290	1159	1164	827	761	689	727	703	1103	1106	1039	1166	911.71	720	1104	1.528	0.612	10.436	1.70338e-25	4.48855e-24	0.000919587	0.0035718	0.00215194	0.00215194	TRUE	0.0187333	No
orf19.2352	453	293	438	503	437	357	383	208	406	373	448	415	374	341	342	293	373.98	410	338	0.825	-0.277	-3.089	0.00200898	0.00474261	0.00403875	0.00586132	0.00503803	0.00503803	TRUE	0.0742834	No
orf19.2356	24541	17259	21982	27864	28074	25541	28171	17897	22016	21973	22490	22977	24010	24370	25138	25242	23526.9	22364	24690	1.104	0.142	4.616	3.90804e-06	1.51285e-05	0.000457772	0.00204123	0.000871711	0.000871711	TRUE	0.00422887	No
orf19.236	12020	7994	9188	11854	10652	9144	9387	5525	10783	10177	9400	9775	9110	8725	8376	7793	9267.41	10034	8501	0.848	-0.239	-4.098	4.16061e-05	0.000136372	0.00375855	0.00213617	0.00314733	0.00314733	TRUE	0.0378809	No
orf19.2360	10077	7361	9717	11219	8826	8153	8552	5580	9040	9371	9941	9251	7548	7779	7631	7870	8554.15	9401	7707	0.82	-0.287	-7.503	6.2354e-14	6.47017e-13	0.000858999	0.00214923	0.00128433	0.00128433	TRUE	0.0183519	No
orf19.2361	2929	2108	2597	3098	3823	3544	3918	2484	2628	2684	2657	2555	3270	3382	3496	3503	3021.71	2631	3413	1.297	0.375	9.507	1.96633e-21	3.92483e-20	0.000481612	0.00245995	0.00115906	0.00115906	TRUE	0.00994127	No
orf19.2362	3403	2465	2892	3646	3635	3188	3316	2188	3053	3138	2959	3007	3109	3042	2959	3086	3044	3039	3049	1.003	0.005	0.136	0.892185	0.91848	0.000203478	0.00245643	0.000992237	0.000992237	TRUE	0.00543628	No
orf19.2363	4116	2749	3408	4432	3989	3693	4079	2430	3692	3500	3487	3655	3412	3524	3640	3427	3542.01	3584	3501	0.977	-0.034	-0.86	0.389556	0.478453	0.00050795	0.00238938	0.00121828	0.00121828	TRUE	0.00889615	No
orf19.2364	1617	1028	1448	1706	1588	1419	1502	1014	1451	1309	1481	1407	1358	1354	1340	1430	1391.27	1412	1370	0.968	-0.047	-0.906	0.365015	0.453852	0.000897432	0.00302296	0.00184754	0.00184754	TRUE	0.0265942	No
orf19.2365	2374	1709	2139	2542	2473	2329	2400	1404	2130	2176	2188	2096	2115	2222	2142	1980	2131.14	2148	2115	0.987	-0.019	-0.42	0.674547	0.739945	0.000702378	0.00266071	0.00149446	0.00149446	TRUE	0.0200495	No
orf19.2366	4	1	2	1	1	3	2	2	4	1	2	1	1	3	2	3	2.01	2	2	1.036	0.051	0.053	0.95793	NA	1e-08	0.725318	0.394677	0.394677	TRUE	0.343676	No
orf19.2367	1155	1059	1107	1318	1423	1439	1467	672	1036	1348	1133	1087	1217	1373	1309	948	1181.33	1151	1212	1.056	0.079	0.714	0.475263	0.560868	0.0184558	0.00320839	0.0107969	0.0107969	TRUE	0.24816	No
orf19.2368	2101	1558	1788	2174	2116	2133	2214	1125	1885	1984	1829	1793	1810	2035	1976	1587	1862.2	1873	1852	0.991	-0.013	-0.174	0.861809	0.895429	0.00629919	0.00275909	0.00470785	0.00470785	TRUE	0.106882	No
orf19.2369	621	508	595	783	621	631	642	410	557	647	609	646	531	602	573	578	592.82	615	571	0.929	-0.106	-1.462	0.143818	0.208157	0.00234565	0.00442832	0.00333767	0.00333767	TRUE	0.0484592	No
orf19.2369.1	1459	1077	1163	1470	1469	1332	1377	702	1309	1371	1190	1212	1256	1271	1229	990	1228.52	1270	1186	0.937	-0.094	-1.155	0.248019	0.32996	0.00733258	0.00316119	0.00549902	0.00549902	TRUE	0.139846	No
orf19.2370	271	244	276	316	342	346	367	204	243	311	282	261	292	330	327	288	291.82	274	309	1.137	0.186	1.899	0.057598	0.09499	0.00433274	0.00695419	0.00574921	0.00574921	TRUE	0.0813277	No
orf19.2371	1706	1218	1509	1871	2275	1898	1992	1259	1530	1551	1544	1543	1946	1811	1778	1776	1684.71	1542	1828	1.187	0.247	5.377	7.5883e-08	3.78582e-07	0.000551551	0.00284121	0.00142775	0.00142775	TRUE	0.0238397	No
orf19.2372	2491	1891	2293	2729	2856	2500	2645	1648	2235	2407	2346	2250	2443	2385	2360	2324	2343.88	2310	2378	1.032	0.045	1.09	0.275783	0.360158	0.000379029	0.00259888	0.00121609	0.00121609	TRUE	0.00932203	No
orf19.2376	94	55	58	91	65	67	69	45	84	70	59	75	56	64	62	63	66.66	72	61	0.84	-0.251	-1.439	0.150164	0.21591	1e-08	0.0237569	0.0141153	0.0141153	TRUE	0.131985	No
orf19.2378	541	351	446	564	468	417	430	305	485	447	456	465	400	398	384	430	433.2	463	403	0.865	-0.209	-2.931	0.00337547	0.00756711	1e-08	0.00533064	0.00257463	0.00257463	TRUE	0.0195212	No
orf19.2379	4197	2682	3705	4651	4079	3420	3826	2559	3765	3414	3791	3835	3488	3263	3414	3609	3572.57	3701	3444	0.929	-0.106	-2.128	0.033337	0.0588565	0.00187529	0.00238587	0.00210586	0.00210586	TRUE	0.0320732	No
orf19.238	4846	3380	4192	5115	7210	6274	6632	3910	4347	4303	4289	4218	6166	5986	5918	5515	5092.82	4289	5896	1.376	0.46	11.248	2.36884e-29	8.17932e-28	0.000898501	0.00226457	0.00140728	0.00140728	TRUE	0.0221957	No
orf19.2381	491	381	452	532	802	635	690	500	440	485	462	439	686	606	616	705	554.92	456	653	1.431	0.517	6.962	3.35872e-12	2.88686e-11	0.00230333	0.00459557	0.00342273	0.00342273	TRUE	0.0296003	No
orf19.2382	482	349	436	522	453	438	455	278	432	444	446	430	387	418	406	392	419.59	438	401	0.916	-0.126	-1.801	0.0716253	0.114937	1e-08	0.00543936	0.00233577	0.00233577	TRUE	0.00958522	No
orf19.2383	187	110	169	205	133	130	127	112	168	140	173	169	114	124	113	158	144.85	162	127	0.77	-0.376	-2.824	0.00473756	0.010281	0.00698519	0.0120014	0.0100019	0.0100019	TRUE	0.220747	No
orf19.2384	2639	1733	2248	2787	2831	2343	2477	1600	2367	2206	2300	2298	2421	2236	2210	2257	2286.95	2293	2281	0.995	-0.008	-0.176	0.860677	0.894627	0.000890442	0.0026143	0.00153315	0.00153315	TRUE	0.0217475	No
orf19.2385	2822	1838	2342	2829	2872	2557	2624	1650	2532	2340	2396	2333	2456	2440	2341	2327	2395.65	2400	2391	0.997	-0.005	-0.113	0.910238	0.933546	0.000729608	0.0025855	0.00141366	0.00141366	TRUE	0.0169113	No
orf19.2386	5140	3691	4389	5723	5500	4865	5232	3364	4611	4699	4490	4719	4704	4642	4669	4745	4659.86	4630	4690	1.013	0.018	0.57	0.56894	0.648121	8.20592e-05	0.00229106	0.000757869	0.000757869	TRUE	0.00497373	No
orf19.2387	4569	3062	4132	4898	4580	4030	4499	2747	4099	3898	4227	4039	3917	3845	4015	3874	3989.35	4066	3913	0.962	-0.056	-1.487	0.137134	0.199831	0.000409068	0.00234342	0.00109017	0.00109017	TRUE	0.00881703	No
orf19.2389	1042	639	895	1050	1166	1001	1010	640	935	814	916	866	997	955	901	903	910.76	883	939	1.064	0.089	1.426	0.153987	0.220538	0.00190913	0.00357347	0.00267827	0.00267827	TRUE	0.0298591	No
orf19.239	3791	2657	3410	4059	4165	3995	4302	2513	3401	3383	3489	3347	3562	3812	3839	3544	3547.07	3405	3689	1.084	0.117	2.837	0.00455561	0.0099167	0.000693358	0.00238879	0.00134519	0.00134519	TRUE	0.00908584	No
orf19.2391	1008	630	774	1001	899	727	828	601	904	802	792	825	769	694	739	848	796.59	831	762	0.914	-0.13	-1.791	0.0733522	0.117364	0.00380909	0.00380192	0.00382875	0.00382875	TRUE	0.0605732	No
orf19.2392	0	0	0	0	0	0	0	0	0	0	0	0	0	0	0	0	0	0	0	NA	NA	NA	NA	NA	NA	NA	NA	NA	NA	NA	NA
orf19.2393	7006	4578	5929	7428	6773	5616	6314	3769	6285	5828	6066	6125	5792	5359	5634	5316	5800.71	6076	5525	0.91	-0.137	-3.274	0.00106001	0.00265798	0.00110112	0.00222979	0.00150238	0.00150238	TRUE	0.0129894	No
orf19.2394	46	41	39	43	28	31	35	32	41	52	40	35	24	30	31	45	37.34	42	32	0.759	-0.398	-1.611	0.107218	0.161851	0.014921	0.0408582	0.030879	0.030879	TRUE	0.349896	No
orf19.2395	21	12	24	10	14	13	17	12	19	15	25	8	12	12	15	17	15.42	17	14	0.841	-0.249	-0.642	0.521073	0.60413	0.0555369	0.0961014	0.078729	0.078729	TRUE	0.295118	No
orf19.2396	503	344	448	541	643	568	628	396	451	438	458	446	550	542	560	559	500.56	448	553	1.231	0.3	4.687	2.77799e-06	1.10166e-05	1e-08	0.0048797	0.00192599	0.00192599	TRUE	0.00236843	No
orf19.2397	215	158	195	219	229	208	176	138	193	201	200	181	196	198	157	195	190.02	194	186	0.964	-0.053	-0.483	0.629114	0.700466	1e-08	0.00961943	0.00641993	0.00641993	TRUE	0.13183	No
orf19.2397.3	6105	4648	5277	6513	6566	6653	6954	3814	5477	5917	5399	5371	5615	6348	6205	5379	5713.99	5541	5887	1.063	0.089	1.48	0.138882	0.201888	0.00392868	0.00223358	0.00326121	0.00326121	TRUE	0.0402054	No
orf19.2398	13587	9647	12043	15300	19972	17786	19466	12883	12189	12282	12321	12617	17081	16971	17370	18170	14875	12352	17398	1.408	0.494	15.235	2.06711e-52	2.43514e-50	0.000504422	0.00207712	0.000938599	0.000938599	TRUE	0.0106915	No
orf19.2399	441	363	391	455	463	489	520	253	396	462	400	375	396	467	464	357	414.55	408	421	1.038	0.054	0.536	0.591961	0.669522	0.00937131	0.0054814	0.00737769	0.00737769	TRUE	0.106812	No
orf19.24	6532	4465	5634	7017	4698	4031	4267	2773	5860	5684	5764	5786	4018	3846	3808	3911	4834.69	5774	3896	0.675	-0.568	-17.466	2.58444e-68	5.54548e-66	0.000135835	0.00227979	0.000799131	0.000799131	TRUE	0.00580898	No
orf19.240	1459	1092	1300	1623	1857	1820	1766	908	1309	1390	1330	1338	1588	1737	1576	1281	1443.59	1342	1546	1.155	0.207	2.608	0.00910715	0.0185289	0.00703856	0.00298514	0.00536621	0.00536621	TRUE	0.152078	No
orf19.2400	4440	3169	3933	4824	4499	4240	4511	2486	3983	4034	4024	3978	3848	4046	4025	3506	3930.54	4005	3856	0.964	-0.053	-1.086	0.277523	0.361526	0.00178201	0.00234886	0.00200134	0.00200134	TRUE	0.0432446	No
orf19.2401	336	280	334	364	306	330	336	205	301	356	342	300	262	315	300	289	308.16	325	292	0.9	-0.152	-1.602	0.10912	0.164144	0.00392102	0.00669034	0.00536141	0.00536141	TRUE	0.0590767	No
orf19.2402	3350	2275	2904	3591	3380	2821	2988	2034	3005	2896	2971	2961	2891	2692	2666	2869	2868.92	2958	2780	0.938	-0.092	-2.204	0.0275147	0.0496979	0.000534729	0.00248553	0.00130663	0.00130663	TRUE	0.00971237	No
orf19.2404	3590	2544	3129	3817	3935	3729	4122	2436	3221	3239	3201	3148	3365	3558	3678	3436	3355.7	3202	3509	1.097	0.133	3.349	0.00081223	0.00208445	0.000614951	0.00241213	0.00121799	0.00121799	TRUE	0.0130958	No
orf19.2406	2062	1511	1939	2335	2487	2323	2451	1420	1850	1924	1984	1925	2127	2217	2187	2003	2027.02	1921	2134	1.113	0.154	3.327	0.00087798	0.00223418	0.000733591	0.0026957	0.0015655	0.0015655	TRUE	0.0186472	No
orf19.2407	4012	2701	3651	4187	4061	3657	3741	2374	3599	3439	3735	3453	3473	3489	3338	3348	3484.36	3556	3412	0.96	-0.059	-1.451	0.146861	0.211745	0.000662806	0.00239616	0.00131993	0.00131993	TRUE	0.01377	No
orf19.2408	1194	853	1024	1282	1691	1617	1604	1030	1071	1086	1048	1057	1446	1543	1431	1453	1266.88	1066	1468	1.379	0.464	9.73	2.25474e-22	4.83803e-21	1e-08	0.00312541	0.00136975	0.00136975	TRUE	0.0145323	No
orf19.2410	2320	1716	1951	2463	2360	2205	2397	1452	2081	2185	1996	2031	2018	2104	2139	2048	2075.27	2073	2077	1.003	0.005	0.107	0.914671	0.937452	0.000475372	0.00267905	0.00140063	0.00140063	TRUE	0.0147033	No
orf19.2411	1505	1087	1297	1599	1476	1352	1429	866	1350	1384	1327	1319	1262	1290	1275	1221	1303.56	1345	1262	0.941	-0.088	-1.951	0.0510048	0.0856448	1e-08	0.00309317	0.00119091	0.00119091	TRUE	0.00482764	No
orf19.2412	354	257	285	389	383	345	369	189	318	327	292	321	328	329	329	267	313.71	314	313	1.004	0.005	0.059	0.953238	0.966591	0.00190934	0.00660701	0.00456901	0.00456901	TRUE	0.0936685	No
orf19.2414	6549	4373	5382	6649	9629	8265	8602	5697	5875	5567	5506	5483	8235	7886	7676	8035	6782.97	5608	7958	1.419	0.505	13.178	1.16902e-39	7.80386e-38	0.000762801	0.00219354	0.00125586	0.00125586	TRUE	0.0127839	No
orf19.2415	728	487	655	727	602	492	570	331	653	620	670	599	515	469	509	467	562.81	636	490	0.773	-0.371	-5.397	6.79359e-08	3.407e-07	0.000949635	0.0045589	0.00273741	0.00273741	TRUE	0.0192712	No
orf19.2416.1	291	190	234	275	401	308	322	243	261	242	239	227	343	294	287	343	279.5	242	317	1.304	0.383	3.955	7.66585e-05	0.000238511	0.00340571	0.00717341	0.00536126	0.00536126	TRUE	0.045569	No
orf19.2417	985	689	880	1038	811	720	810	504	884	877	900	856	694	687	723	711	791.42	879	704	0.8	-0.322	-5.941	2.82437e-09	1.68175e-08	1e-08	0.00381383	0.00153504	0.00153504	TRUE	0.00457876	No
orf19.2418	766	488	638	756	903	656	723	495	687	621	653	623	772	626	645	698	665.77	646	685	1.06	0.084	1.082	0.27913	0.363226	0.0044384	0.00416002	0.00431022	0.00431022	TRUE	0.0926856	No
orf19.2419	1365	936	1181	1471	1732	1461	1542	985	1225	1192	1208	1213	1481	1394	1376	1389	1309.75	1210	1410	1.166	0.222	4.763	1.90269e-06	7.71347e-06	1e-08	0.0030879	0.0013188	0.0013188	TRUE	0.0147699	No
orf19.242	116	74	112	148	156	154	165	99	104	94	115	122	133	147	147	140	125.27	109	142	1.296	0.374	2.924	0.00345826	0.00772675	1e-08	0.0135685	0.00764915	0.00764915	TRUE	0.0726882	No
orf19.2422	3254	2133	2765	3408	3373	2930	3210	1947	2919	2716	2829	2810	2885	2796	2864	2746	2820.59	2818	2823	1.002	0.002	0.061	0.951362	0.965178	0.000220874	0.0024942	0.00108873	0.00108873	TRUE	0.00701651	No
orf19.242.2	125	96	90	131	153	147	153	68	112	122	92	108	131	140	137	96	117.25	108	126	1.174	0.232	1.575	0.115243	0.171935	0.00889346	0.0143607	0.0122155	0.0122155	TRUE	0.208392	No
orf19.2423	2286	1482	1968	2363	2322	1941	2221	1539	2051	1887	2013	1949	1986	1852	1982	2171	1986.24	1975	1998	1.009	0.013	0.242	0.808674	0.851773	0.00195977	0.0027104	0.00237809	0.00237809	TRUE	0.0383445	No
orf19.2425	206	139	186	238	263	238	252	155	185	177	190	196	225	227	225	219	205.48	187	224	1.195	0.257	2.673	0.0075149	0.0155795	1e-08	0.00904454	0.0039848	0.0039848	TRUE	0.012553	No
orf19.2426	412	292	387	482	494	434	440	316	370	372	396	397	422	414	393	446	401.21	384	419	1.087	0.12	1.603	0.109008	0.164059	1e-08	0.00559785	0.0028645	0.0028645	TRUE	0.0202942	No
orf19.2429	53	40	33	57	35	29	32	17	48	51	34	47	30	28	29	24	36.17	45	28	0.621	-0.687	-2.925	0.00344254	0.00769735	1e-08	0.0421134	0.0239692	0.0239692	TRUE	0.207693	No
orf19.243	810	553	668	800	1195	974	1087	678	727	704	683	660	1022	929	970	956	831.42	694	969	1.4	0.486	8.273	1.30163e-16	1.74558e-15	0.000726935	0.00372557	0.00207396	0.00207396	TRUE	0.0168882	No
orf19.2430	10	19	8	16	9	8	4	1	9	24	8	13	8	8	4	1	9.36	14	5	0.395	-1.339	-2.423	0.015393	NA	0.168194	0.15714	0.161397	0.161397	TRUE	0.932826	No
orf19.2431	34	32	39	53	32	30	36	24	31	41	40	44	27	29	32	34	34.6	39	30	0.783	-0.353	-1.496	0.13465	0.197023	1e-08	0.0439343	0.0240108	0.0240108	TRUE	0.170112	No
orf19.2432	7865	6199	7301	8859	6562	6629	7026	4325	7056	7892	7470	7305	5612	6325	6270	6100	6753.67	7431	6077	0.818	-0.29	-5.687	1.29136e-08	7.0532e-08	0.00234291	0.00219447	0.0023447	0.0023447	TRUE	0.0328836	No
orf19.2433	186	163	154	191	150	181	174	94	167	208	158	158	128	173	155	133	159.78	173	147	0.861	-0.215	-1.584	0.11311	0.16913	0.0118651	0.0110649	0.0113904	0.0113904	TRUE	0.180085	No
orf19.2434	1831	1528	1783	2321	1819	1857	1904	1177	1643	1945	1824	1914	1556	1772	1699	1660	1751.58	1832	1672	0.913	-0.131	-2.035	0.0418023	0.0718182	0.00344821	0.00280832	0.00339959	0.00339959	TRUE	0.0591319	No
orf19.2435	11326	8670	10089	12759	10574	10403	10638	6488	10161	11038	10322	10521	9043	9926	9493	9151	9956.82	10510	9403	0.895	-0.16	-3.744	0.000180758	0.00053053	0.00141878	0.00212532	0.00165407	0.00165407	TRUE	0.0171797	No
orf19.2436	6989	5000	6211	7878	8296	7833	8404	5187	6270	6366	6354	6496	7095	7474	7499	7316	6858.77	6372	7346	1.153	0.205	6.375	1.83514e-10	1.27906e-09	0.000329367	0.00219118	0.000847489	0.000847489	TRUE	0.00671841	No
orf19.2437	693	621	631	874	742	870	841	596	622	791	646	721	635	830	750	841	729.29	695	764	1.099	0.136	1.344	0.178976	0.250708	0.0120126	0.00397008	0.00848117	0.00848117	TRUE	0.157624	No
orf19.2438	2093	1485	1752	2362	2572	2316	2340	1327	1878	1891	1792	1948	2200	2210	2088	1872	1984.7	1877	2092	1.116	0.159	2.711	0.00671126	0.0141033	0.00272934	0.00271097	0.00279233	0.00279233	TRUE	0.0572818	No
orf19.2439	1661	1164	1239	1652	1668	1518	1481	900	1490	1482	1268	1362	1427	1448	1322	1269	1383.47	1400	1366	0.978	-0.033	-0.488	0.625647	0.69775	0.00406039	0.00302884	0.00360788	0.00360788	TRUE	0.0483482	No
orf19.2439.1	1965	1284	1597	2137	2202	1831	1829	1080	1763	1635	1634	1762	1883	1747	1632	1523	1697.4	1698	1696	1	0	-0.002	0.998539	0.998706	0.00441034	0.00283477	0.0037282	0.0037282	TRUE	0.0666298	No
orf19.244	85	48	62	63	79	66	58	42	76	61	63	52	68	63	52	59	61.78	63	60	0.957	-0.063	-0.337	0.736216	0.793824	1e-08	0.0254757	0.0173559	0.0173559	TRUE	0.190548	No
orf19.2440	722	599	736	867	965	1037	1029	615	648	763	753	715	825	989	918	867	809.83	720	900	1.254	0.326	4.314	1.60588e-05	5.67399e-05	0.00462078	0.00377213	0.00423138	0.00423138	TRUE	0.0542892	No
orf19.2442	306	263	239	335	408	474	492	296	275	335	245	276	349	452	439	417	348.48	283	414	1.471	0.557	5.003	5.64725e-07	2.48198e-06	0.0118022	0.00614535	0.00890244	0.00890244	TRUE	0.158179	No
orf19.2443	1053	929	1018	1230	1099	1112	1115	677	945	1183	1042	1014	940	1061	995	955	1016.74	1046	988	0.947	-0.078	-1.067	0.285792	0.370132	0.00476026	0.00340733	0.00419834	0.00419834	TRUE	0.0885978	No
orf19.2444	3636	2773	3241	4237	3217	3034	3106	1945	3262	3530	3316	3494	2751	2895	2772	2743	3095.38	3400	2790	0.821	-0.284	-6.783	1.17386e-11	9.49201e-11	0.000768432	0.00244851	0.00135946	0.00135946	TRUE	0.00928626	No
orf19.2445	120	80	111	131	92	79	84	68	108	102	114	108	79	75	75	96	94.5	108	81	0.744	-0.426	-2.968	0.00299596	0.00680519	1e-08	0.0173412	0.00899807	0.00899807	TRUE	0.103956	No
orf19.2446	567	464	502	635	678	715	682	473	509	591	514	524	580	682	609	667	584.3	534	634	1.188	0.249	3.219	0.00128476	0.00316345	0.00356612	0.00446405	0.00400427	0.00400427	TRUE	0.0541739	No
orf19.2447	1581	1257	1405	1717	1484	1404	1483	907	1418	1600	1437	1416	1269	1340	1323	1279	1385.41	1468	1303	0.89	-0.169	-3.141	0.0016838	0.00403521	0.00120139	0.00302737	0.00203988	0.00203988	TRUE	0.0415751	No
orf19.2449	9	4	13	13	10	7	12	3	8	5	13	11	9	7	11	4	8.42	9	8	0.823	-0.281	-0.577	0.563975	NA	1e-08	0.174397	0.110738	0.110738	TRUE	0.17204	No
orf19.245	471	432	480	579	541	562	600	377	423	550	491	477	463	536	535	532	500.89	485	516	1.067	0.093	1.046	0.295458	0.380354	0.00627375	0.00487778	0.00558541	0.00558541	TRUE	0.0886253	No
orf19.2451	879	720	849	1021	568	590	571	409	789	917	869	842	486	563	510	577	693.86	854	534	0.624	-0.681	-9.147	5.87983e-20	1.05451e-18	0.00351469	0.00407175	0.00378602	0.00378602	TRUE	0.0437278	No
orf19.2452	1267	1077	1195	1472	974	1041	1057	629	1137	1371	1223	1214	833	993	943	887	1075.1	1236	914	0.741	-0.433	-5.869	4.37203e-09	2.56265e-08	0.00475012	0.00332981	0.00425571	0.00425571	TRUE	0.0622608	No
orf19.2454	10799	8432	10043	11920	12521	12228	12522	8083	9688	10735	10275	9829	10708	11668	11174	11400	10684.6	10132	11238	1.109	0.15	3.372	0.000746453	0.00193139	0.0016211	0.00211539	0.00179965	0.00179965	TRUE	0.0194058	No
orf19.2455	3245	2594	3087	3721	3630	3562	3736	2227	2911	3302	3158	3068	3104	3399	3334	3141	3177.28	3110	3244	1.044	0.063	1.227	0.219734	0.298546	0.00195284	0.00243642	0.00219329	0.00219329	TRUE	0.0225284	No
orf19.2457	804	676	811	952	1179	1160	1173	742	721	861	830	785	1008	1107	1047	1047	925.63	799	1052	1.32	0.4	6.172	6.74742e-10	4.39203e-09	0.00239563	0.00354786	0.00293129	0.00293129	TRUE	0.0514839	No
orf19.2458	16060	11954	14679	19026	21292	19620	21289	14171	14407	15219	15018	15689	18210	18721	18997	19987	17030.9	15083	18979	1.258	0.331	8.064	7.40634e-16	9.25099e-15	0.00131565	0.00206476	0.00155961	0.00155961	TRUE	0.015473	No
orf19.2459	5233	3473	4616	5903	5436	4999	5332	3531	4695	4421	4723	4868	4649	4770	4758	4980	4732.92	4677	4789	1.023	0.032	0.787	0.431092	0.518208	0.000928565	0.00228625	0.00140678	0.00140678	TRUE	0.015878	No
orf19.246	440	284	393	463	481	428	457	287	395	362	402	382	411	408	408	405	396.56	385	408	1.058	0.082	1.136	0.255875	0.338403	1e-08	0.00564024	0.00247338	0.00247338	TRUE	0.016229	No
orf19.2460	6	3	5	16	13	9	7	6	5	4	5	13	11	9	6	8	7.74	7	8	1.214	0.279	0.528	0.597373	NA	0.0745602	0.189521	0.140499	0.140499	TRUE	1.21335	No
orf19.2461	1456	995	1233	1542	1161	1029	1132	678	1306	1267	1261	1272	993	982	1010	956	1130.89	1276	985	0.773	-0.372	-7.912	2.52698e-15	2.98861e-14	1e-08	0.00326321	0.00122222	0.00122222	TRUE	0.0039497	No
orf19.2462	3618	2517	3187	3933	2895	2573	2811	1655	3246	3204	3261	3243	2476	2455	2508	2334	2840.94	3238	2443	0.756	-0.404	-11.04	2.44399e-28	8.20006e-27	1e-08	0.00249052	0.000927751	0.000927751	TRUE	0.00974015	No
orf19.2463	1150	705	948	1121	939	942	979	523	1032	898	970	924	803	899	874	738	892.08	956	828	0.868	-0.204	-2.796	0.00517215	0.0111457	0.00424107	0.00360685	0.00398745	0.00398745	TRUE	0.0578395	No
orf19.2465	4484	2985	3798	4748	3805	3248	3540	2109	4023	3800	3886	3915	3254	3099	3159	2975	3513.82	3906	3122	0.8	-0.322	-8.066	7.27541e-16	9.10639e-15	0.000594673	0.00239266	0.00124208	0.00124208	TRUE	0.0113293	No
orf19.2467	3723	2543	3186	4017	3007	2443	2694	1692	3340	3238	3260	3312	2572	2331	2404	2386	2855.32	3288	2423	0.737	-0.439	-10.545	5.3685e-26	1.52141e-24	0.000540391	0.00248794	0.00130701	0.00130701	TRUE	0.021513	No
orf19.2468	22	20	13	23	8	8	3	3	20	25	13	19	7	8	3	4	12.36	19	6	0.282	-1.828	-4.028	5.6134e-05	NA	1e-08	0.119469	0.079884	0.079884	TRUE	0.210443	No
orf19.2469	198	156	201	246	161	146	149	94	178	199	206	203	138	139	133	133	165.91	196	136	0.693	-0.529	-4.826	1.39437e-06	5.75368e-06	1e-08	0.0107295	0.00533696	0.00533696	TRUE	0.0474184	No
orf19.247	165	127	133	203	202	203	188	98	148	162	136	167	173	194	168	138	160.7	153	168	1.104	0.143	1.139	0.254598	0.337219	0.00618302	0.0110131	0.00896927	0.00896927	TRUE	0.122672	No
orf19.2471	979	644	833	1024	898	804	853	549	878	820	852	844	768	767	761	774	808.18	848	768	0.903	-0.147	-2.768	0.00563976	0.0120454	1e-08	0.00377579	0.0014773	0.0014773	TRUE	0.00656731	No
orf19.2472	777	560	703	808	814	695	734	502	697	713	719	666	696	663	655	708	689.73	699	680	0.974	-0.039	-0.646	0.518424	0.601872	1e-08	0.00408427	0.0019678	0.0019678	TRUE	0.0124747	No
orf19.2472.1	1387	922	976	1454	1720	1359	1361	911	1244	1174	999	1199	1471	1297	1214	1285	1235.34	1154	1317	1.141	0.191	2.378	0.0173962	0.0328357	0.00669253	0.00315467	0.00534886	0.00534886	TRUE	0.0986164	No
orf19.2473	2880	1972	2663	3207	3305	3002	3155	2074	2584	2511	2725	2645	2827	2864	2815	2925	2736.84	2616	2858	1.091	0.126	3.201	0.0013712	0.00335294	0.000265081	0.00250995	0.00111389	0.00111389	TRUE	0.00909693	No
orf19.2474	1347	864	1159	1318	1256	1113	1202	813	1208	1100	1186	1087	1074	1062	1073	1147	1117.05	1145	1089	0.949	-0.076	-1.369	0.170915	0.241046	0.00111913	0.00327911	0.00207033	0.00207033	TRUE	0.0171477	No
orf19.2475	5	6	11	6	5	6	8	2	4	8	11	5	4	6	7	3	6.04	7	5	0.734	-0.446	-0.773	0.43966	NA	1e-08	0.242494	0.151059	0.151059	TRUE	0.438001	No
orf19.2476	1276	1001	1210	1373	1644	1575	1583	1012	1145	1274	1238	1132	1406	1503	1413	1427	1317.24	1197	1437	1.203	0.267	4.887	1.02371e-06	4.31609e-06	0.0013387	0.0030816	0.00209073	0.00209073	TRUE	0.0213148	No
orf19.2478	52	40	37	53	94	75	77	34	47	51	38	44	80	72	69	48	55.97	45	67	1.527	0.61	3.025	0.0024863	0.00574747	0.00923213	0.0279172	0.0206198	0.0206198	TRUE	0.250525	No
orf19.2478.1	23826	15555	19610	24492	22386	18853	19644	14457	21374	19803	20063	20196	19145	17989	17529	20390	19561.3	20359	18763	0.921	-0.118	-2.278	0.0227205	0.041847	0.00284368	0.00205374	0.00253269	0.00253269	TRUE	0.0413683	No
orf19.2479	186	128	159	167	161	155	163	98	167	163	163	138	138	148	145	138	149.93	158	142	0.907	-0.14	-1.203	0.228908	0.308844	1e-08	0.0116619	0.00636797	0.00636797	TRUE	0.086216	No
orf19.248	1049	779	935	1191	1031	1087	1111	678	941	992	957	982	882	1037	991	956	967.26	968	966	0.999	-0.002	-0.025	0.980001	0.985084	0.00177408	0.00348036	0.00252424	0.00252424	TRUE	0.0451923	No
orf19.2480.1	13817	9160	11999	14843	17088	14277	15811	9393	12395	11662	12276	12240	14614	13623	14109	13248	13020.8	12143	13898	1.145	0.195	4.854	1.20864e-06	5.04079e-06	0.0011724	0.00209101	0.00147176	0.00147176	TRUE	0.0147194	No
orf19.2481	571	418	448	620	541	462	499	379	512	532	458	511	463	441	445	535	487.17	503	471	0.931	-0.103	-1.282	0.199942	0.274509	0.00350006	0.0049594	0.00417662	0.00417662	TRUE	0.0840558	No
orf19.2483	1847	1173	1425	1816	2182	1678	1694	1469	1657	1493	1458	1497	1866	1601	1512	2072	1644.55	1526	1763	1.153	0.205	2.251	0.024415	0.0446394	0.0113621	0.00286226	0.0073652	0.0073652	TRUE	0.163364	No
orf19.2484	2318	1556	2057	2508	2262	1830	1975	1572	2079	1981	2105	2068	1935	1746	1762	2217	1986.66	2058	1915	0.928	-0.107	-1.489	0.136516	0.199268	0.00619034	0.00271025	0.00447369	0.00447369	TRUE	0.130788	No
orf19.2485	3153	2433	3032	3455	3296	3290	3556	2191	2829	3097	3102	2849	2819	3139	3173	3090	3012.31	2969	3055	1.029	0.042	0.777	0.436868	0.523773	0.00220032	0.00246145	0.00244913	0.00244913	TRUE	0.0339252	No
orf19.2487	2707	1906	2249	2839	2634	2332	2555	1545	2428	2427	2301	2341	2253	2225	2280	2179	2304.23	2374	2234	0.942	-0.086	-2.191	0.0284681	0.0511778	1e-08	0.00260954	0.00103895	0.00103895	TRUE	0.0050562	No
orf19.2488	5040	3447	4349	5413	4821	4260	4675	2668	4521	4388	4449	4464	4123	4065	4172	3763	4243.17	4456	4031	0.906	-0.143	-3.556	0.000376038	0.00104256	0.000798712	0.00232165	0.00131637	0.00131637	TRUE	0.0228388	No
orf19.2489	19412	13817	17689	21223	17737	16166	17228	11717	17415	17591	18098	17501	15169	15425	15373	16526	16637.1	17651	15623	0.885	-0.177	-4.92	8.63856e-07	3.67307e-06	0.000836652	0.00206678	0.00117593	0.00117593	TRUE	0.0181559	No
orf19.2492	41	19	35	33	38	22	24	23	37	24	36	27	32	21	21	32	28.92	31	26	0.853	-0.229	-0.835	0.403595	0.491946	0.013582	0.0521817	0.0372314	0.0372314	TRUE	0.173434	No
orf19.2494	542	393	476	585	534	428	521	317	486	500	487	482	457	408	465	447	466.63	489	444	0.91	-0.136	-1.95	0.0511462	0.0857145	1e-08	0.00509056	0.00254823	0.00254823	TRUE	0.0362321	No
orf19.2495	477	392	457	587	663	564	657	368	428	499	468	484	567	538	586	519	511.13	470	552	1.182	0.242	3.287	0.00101189	0.00254369	0.00153085	0.0048197	0.00321482	0.00321482	TRUE	0.042986	No
orf19.2496	4072	2714	3668	4608	2143	1778	1878	1371	3653	3455	3753	3800	1833	1697	1676	1934	2724.94	3665	1785	0.486	-1.041	-18.837	3.79139e-79	1.0847e-76	0.00262298	0.00251227	0.00251439	0.00251439	TRUE	0.0354306	No
orf19.2498	10012	6666	9115	11167	11072	9143	10296	6861	8982	8487	9326	9208	9469	8724	9187	9677	9132.46	9001	9264	1.029	0.041	0.901	0.367335	0.45617	0.00169485	0.00213848	0.00187071	0.00187071	TRUE	0.0188235	No
orf19.2499	512	419	508	595	688	569	625	357	459	533	520	491	588	543	558	504	524.46	501	548	1.102	0.14	1.865	0.0621149	0.10152	0.00212655	0.00474752	0.00345846	0.00345846	TRUE	0.0364458	No
orf19.25	2469	1687	2045	2665	3180	2748	2978	1896	2215	2148	2092	2198	2720	2622	2657	2674	2415.71	2163	2668	1.233	0.302	7.924	2.30022e-15	2.73658e-14	1e-08	0.00258046	0.00097518	0.00097518	TRUE	0.00603444	No
orf19.250	3949	3274	3537	4607	3790	4159	4322	2654	3543	4168	3619	3799	3241	3968	3857	3743	3742.26	3782	3702	0.979	-0.03	-0.426	0.670343	0.736948	0.00632441	0.00236744	0.00463028	0.00463028	TRUE	0.0867725	No
orf19.2500	409	284	385	447	524	495	494	324	367	362	394	369	448	472	441	457	413.65	373	454	1.218	0.285	3.98	6.89624e-05	0.000217266	1e-08	0.005489	0.00248967	0.00248967	TRUE	0.0161128	No
orf19.2501	8295	6387	7906	9702	9940	9948	10472	6720	7441	8131	8089	8000	8501	9492	9345	9478	8559.67	7915	9204	1.163	0.217	4.502	6.72037e-06	2.51721e-05	0.00198597	0.00214912	0.00212261	0.00212261	TRUE	0.0325849	No
orf19.2503	13	15	19	23	16	24	14	9	12	19	19	19	14	23	12	13	16.37	17	16	0.903	-0.147	-0.412	0.679997	0.744292	1e-08	0.0906777	0.0612675	0.0612675	TRUE	0.51611	No
orf19.2504	16389	12005	14730	17875	14899	14026	14711	8875	14703	15284	15070	14740	12742	13383	13127	12517	13945.8	14949	12942	0.866	-0.207	-6.335	2.37742e-10	1.64557e-09	0.000523129	0.00208362	0.000956207	0.000956207	TRUE	0.00638456	No
orf19.2505	12	8	18	15	21	13	17	11	11	10	18	12	18	12	15	16	14.1	13	15	1.18	0.238	0.65	0.515914	NA	1e-08	0.104952	0.0584014	0.0584014	TRUE	0.320757	No
orf19.2506	1028	709	931	1121	782	710	778	478	922	903	953	924	669	677	694	674	802.05	926	678	0.733	-0.448	-8.372	5.68777e-17	8.0405e-16	1e-08	0.00378951	0.00147133	0.00147133	TRUE	0.00436804	No
orf19.2507	1373	1197	1321	1652	1462	1582	1610	943	1232	1524	1352	1362	1250	1509	1437	1330	1374.49	1368	1382	1.012	0.017	0.225	0.822008	0.862792	0.0065133	0.0030357	0.00495459	0.00495459	TRUE	0.0689727	No
orf19.2508	137	122	115	147	154	173	159	106	123	155	118	121	132	165	142	150	138.16	129	147	1.143	0.193	1.468	0.142113	0.206086	0.00507727	0.0124871	0.00934225	0.00934225	TRUE	0.161888	No
orf19.2509	0	0	0	0	0	0	0	0	0	0	0	0	0	0	0	0	0	0	0	NA	NA	NA	NA	NA	NA	NA	NA	NA	NA	NA	NA
orf19.2509.1	208	157	147	181	88	89	71	55	187	200	150	149	75	85	63	78	123.4	172	75	0.439	-1.186	-7.775	7.55209e-15	8.57712e-14	0.0115755	0.0137433	0.0127567	0.0127567	TRUE	0.118286	No
orf19.251	10057	6880	8489	10693	11165	9856	9932	5974	9022	8759	8685	8818	9549	9404	8863	8426	8940.65	8821	9060	1.028	0.039	0.879	0.37947	0.469009	0.00160652	0.00214189	0.00180504	0.00180504	TRUE	0.0265324	No
orf19.2510	107	113	121	133	113	172	192	83	96	144	124	110	97	164	171	117	127.81	118	137	1.169	0.225	1.165	0.243914	0.325652	0.044164	0.0133379	0.0280452	0.0280452	TRUE	0.249347	No
orf19.2511.1	1494	999	1170	1591	1647	1315	1294	748	1340	1272	1197	1312	1409	1255	1155	1055	1249.26	1280	1218	0.953	-0.069	-0.84	0.401002	0.48948	0.00720047	0.00314157	0.00566976	0.00566976	TRUE	0.133542	No
orf19.2511.2	718	698	729	848	911	1060	1015	559	644	889	746	699	779	1011	906	788	807.82	744	871	1.174	0.231	2.146	0.0318788	0.0565646	0.0161782	0.00377659	0.00990301	0.00990301	TRUE	0.19484	No
orf19.2512	137	119	148	194	170	174	196	128	123	151	151	160	145	166	175	181	156.58	146	167	1.134	0.182	1.457	0.145085	0.209637	0.00516023	0.0112508	0.00853616	0.00853616	TRUE	0.132575	No
orf19.2513	358	392	382	500	431	611	587	365	321	499	391	412	369	583	524	515	451.69	406	498	1.228	0.296	2.016	0.0437554	0.0748101	0.0325941	0.00519343	0.0184332	0.0184332	TRUE	0.365875	No
orf19.2514	818	664	803	996	1130	1128	1199	666	734	845	822	821	966	1076	1070	939	909.25	806	1013	1.261	0.335	4.898	9.67675e-07	4.09422e-06	0.0031978	0.00357612	0.00337106	0.00337106	TRUE	0.0436445	No
orf19.2515	8191	5974	7306	9332	11265	11190	11752	6926	7348	7606	7475	7695	9634	10677	10487	9769	8836.29	7531	10142	1.347	0.43	10.006	1.43624e-23	3.31881e-22	0.00134943	0.00214381	0.00165501	0.00165501	TRUE	0.0154388	No
orf19.2516	432	366	430	586	497	538	540	316	388	466	440	483	425	513	482	446	455.33	444	466	1.052	0.073	0.804	0.421635	0.50943	0.00617364	0.00516779	0.00568402	0.00568402	TRUE	0.089328	No
orf19.2517	236	160	228	262	281	264	256	174	212	204	233	216	240	252	228	245	228.85	216	241	1.114	0.156	1.664	0.09614	0.147764	1e-08	0.00832299	0.00409236	0.00409236	TRUE	0.0291059	No
orf19.2518	3594	2491	3091	3866	3974	3679	3902	2350	3224	3171	3162	3188	3399	3510	3482	3314	3306.41	3186	3426	1.076	0.106	3.052	0.00227543	0.00530904	1e-08	0.00241858	0.000849032	0.000849032	TRUE	0.00528682	No
orf19.2519	420	269	275	420	522	446	466	328	377	342	281	346	446	426	416	463	387.17	336	438	1.295	0.373	4.045	5.23699e-05	0.000168888	0.00533929	0.00572903	0.00554485	0.00554485	TRUE	0.139548	No
orf19.252	416	355	384	519	445	515	518	236	373	452	393	428	381	491	462	333	414.13	412	417	1.018	0.026	0.219	0.82652	0.866771	0.0163087	0.00548493	0.0107583	0.0107583	TRUE	0.191351	No
orf19.2520	2567	1707	2180	2730	2829	2561	2757	1755	2303	2173	2230	2251	2419	2444	2460	2475	2344.51	2239	2450	1.092	0.127	3.425	0.000615294	0.00162064	1e-08	0.00259871	0.000902406	0.000902406	TRUE	0.00441026	No
orf19.2521	597	408	535	610	430	392	445	257	536	519	547	503	368	374	397	362	450.84	526	375	0.715	-0.484	-6.858	6.99042e-12	5.80089e-11	1e-08	0.00519952	0.00251406	0.00251406	TRUE	0.0181491	No
orf19.2524	5949	3739	4829	6050	7296	5970	6383	4267	5337	4760	4941	4989	6240	5696	5696	6018	5459.58	5007	5912	1.18	0.239	4.937	7.95308e-07	3.40571e-06	0.00192488	0.00224542	0.00206927	0.00206927	TRUE	0.0241012	No
orf19.2525	1802	1225	1664	1945	2070	1662	1791	1222	1617	1560	1702	1604	1770	1586	1598	1724	1645.04	1621	1670	1.029	0.042	0.78	0.435419	0.522435	0.00159203	0.002862	0.00210888	0.00210888	TRUE	0.0217152	No
orf19.2527	3925	2602	3458	4210	4143	3418	3829	2335	3521	3313	3538	3472	3543	3261	3417	3293	3419.73	3461	3378	0.976	-0.034	-0.82	0.412494	0.500588	0.000774392	0.00240403	0.00140017	0.00140017	TRUE	0.0133265	No
orf19.2528	3259	2001	2809	3546	3618	2957	3330	2146	2924	2547	2874	2924	3094	2821	2971	3027	2897.88	2817	2978	1.056	0.079	1.446	0.148289	0.213547	0.00237191	0.00248048	0.00248675	0.00248675	TRUE	0.0486775	No
orf19.2529	1393	993	1164	1493	1302	1190	1246	786	1250	1264	1191	1231	1114	1135	1112	1109	1175.66	1234	1118	0.906	-0.142	-3.068	0.00215528	0.00505621	1e-08	0.00321432	0.00121145	0.00121145	TRUE	0.00635216	No
orf19.2529.1	15810	9921	12019	15186	17392	12949	13002	7510	14183	12630	12297	12523	14874	12356	11602	10592	12632.1	12908	12356	0.957	-0.063	-0.701	0.483155	0.568618	0.0114291	0.00209444	0.00762962	0.00762962	TRUE	0.230467	No
orf19.2530	8	3	7	8	8	9	8	4	7	4	7	7	7	9	7	6	6.62	6	7	1.132	0.179	0.347	0.728649	NA	1e-08	0.221251	0.106061	0.106061	TRUE	0.11009	No
orf19.2531	8738	6332	7336	9278	11271	10210	10723	7177	7839	8061	7505	7651	9639	9742	9568	10123	8766.1	7764	9768	1.258	0.331	9.334	1.02226e-20	1.95596e-19	0.000645226	0.00214513	0.00109223	0.00109223	TRUE	0.00785954	No
orf19.2532	1001	705	888	1102	1132	994	1138	679	898	898	909	909	968	948	1015	958	937.81	904	972	1.077	0.108	2.116	0.0343154	0.0604182	1e-08	0.00352749	0.00141349	0.00141349	TRUE	0.0111023	No
orf19.2533.1	1329	911	1099	1386	1152	997	1061	706	1192	1160	1124	1143	985	951	947	996	1062.3	1155	970	0.839	-0.254	-5.15	2.60801e-07	1.20345e-06	1e-08	0.00334609	0.00138219	0.00138219	TRUE	0.00605836	No
orf19.2534	3247	2323	3087	3774	3945	3523	3920	2587	2913	2957	3158	3112	3374	3362	3498	3649	3252.85	3035	3471	1.142	0.192	4.282	1.85178e-05	6.46078e-05	0.00109288	0.00242581	0.00161303	0.00161303	TRUE	0.0137096	No
orf19.2537	38	22	33	35	22	26	30	19	34	28	34	29	19	25	27	27	27.74	31	24	0.771	-0.376	-1.444	0.148717	0.214113	1e-08	0.0543135	0.0283503	0.0283503	TRUE	0.165063	No
orf19.2538	24643	18195	22367	27718	22341	21422	23143	13111	22107	23164	22884	22857	19107	20440	20651	18492	21212.7	22753	19672	0.865	-0.21	-4.899	9.62409e-07	4.07481e-06	0.00153889	0.00204796	0.00170935	0.00170935	TRUE	0.0197329	No
orf19.2539	0	0	2	2	1	1	2	3	0	0	2	2	1	1	2	4	1.44	1	2	1.923	0.943	0.759	0.447634	NA	1e-08	1.01004	0.694331	0.694331	TRUE	0.357515	No
orf19.254	9092	6248	8480	10053	7588	6946	7546	5258	8156	7954	8676	8290	6489	6628	6734	7416	7542.9	8269	6817	0.824	-0.28	-5.656	1.55381e-08	8.41773e-08	0.00232325	0.00217198	0.00221659	0.00221659	TRUE	0.0417896	No
orf19.2540	1039	755	874	1162	1289	1168	1259	675	932	961	894	958	1102	1114	1123	952	1004.75	936	1073	1.15	0.202	3.218	0.00129082	0.00317365	0.00207665	0.00342436	0.00276521	0.00276521	TRUE	0.0618646	No
orf19.2541	606	546	583	718	726	769	790	431	544	695	596	592	621	734	705	608	636.85	607	667	1.104	0.143	1.598	0.110008	0.165356	0.0076994	0.00425903	0.00606696	0.00606696	TRUE	0.106285	No
orf19.2542	468	435	440	570	526	535	538	339	420	554	450	470	450	510	480	478	476.55	474	480	1.017	0.024	0.266	0.78988	0.836229	0.00599113	0.00502581	0.00550629	0.00550629	TRUE	0.1399	No
orf19.2544	403	265	331	422	396	358	351	234	362	337	339	348	339	342	313	330	338.63	346	331	0.954	-0.068	-0.877	0.380564	0.469802	1e-08	0.00626649	0.00288354	0.00288354	TRUE	0.0164121	No
orf19.2545	5760	3755	5071	6166	5566	4620	5235	3245	5167	4781	5188	5085	4760	4408	4671	4577	4829.64	5055	4604	0.911	-0.135	-3.258	0.00112336	0.00280165	0.000952908	0.0022801	0.00144585	0.00144585	TRUE	0.0157263	No
orf19.2546	1906	1348	1673	2139	2366	2240	2432	1491	1710	1716	1712	1764	2023	2137	2170	2103	1916.93	1726	2108	1.221	0.289	6.914	4.71622e-12	3.99085e-11	1e-08	0.00273683	0.00114526	0.00114526	TRUE	0.00964219	No
orf19.2547	3064	2409	2931	3470	3365	3428	3570	2131	2749	3067	2999	2861	2878	3271	3186	3006	3001.96	2919	3085	1.058	0.081	1.491	0.135989	0.198596	0.00238412	0.00246311	0.0025074	0.0025074	TRUE	0.0258238	No
orf19.2549	3554	2428	3043	3636	3335	2969	3134	1878	3188	3091	3113	2998	2852	2833	2797	2649	2940.18	3098	2783	0.9	-0.153	-3.811	0.000138379	0.000412392	0.000413026	0.00247327	0.00119832	0.00119832	TRUE	0.0116198	No
orf19.255	14644	11260	13961	16782	11443	11114	11718	7165	13137	14335	14283	13839	9786	10605	10456	10106	12068.4	13898	10238	0.737	-0.441	-10.487	9.95306e-26	2.71809e-24	0.00132413	0.00209981	0.00161072	0.00161072	TRUE	0.016678	No
orf19.2551	11153	7465	9800	11837	7293	6391	6606	4724	10005	9504	10026	9761	6237	6098	5895	6663	8023.66	9824	6223	0.633	-0.66	-15.161	6.37647e-52	7.36728e-50	0.00150055	0.00216045	0.00168722	0.00168722	TRUE	0.0266937	No
orf19.2552	616	435	563	691	943	906	930	601	553	554	576	570	806	864	830	848	700.09	563	837	1.485	0.57	9.859	6.25618e-23	1.38188e-21	1e-08	0.00405312	0.00172989	0.00172989	TRUE	0.00769031	No
orf19.2553	220	189	224	299	329	348	357	200	197	241	229	247	281	332	319	282	265.97	228	304	1.333	0.415	4.059	4.9189e-05	0.000159486	0.00479942	0.00743761	0.00620085	0.00620085	TRUE	0.0985061	No
orf19.2555	1872	1391	1701	2157	1849	1680	1703	1148	1679	1771	1740	1779	1581	1603	1520	1619	1661.55	1742	1581	0.907	-0.141	-3.22	0.0012837	0.00316213	1e-08	0.00285323	0.00124738	0.00124738	TRUE	0.00833136	No
orf19.2557	2057	1487	1767	2211	2302	1944	2108	1303	1845	1893	1808	1823	1969	1855	1881	1838	1863.99	1842	1886	1.025	0.036	0.854	0.392851	0.481585	1e-08	0.00275834	0.00117485	0.00117485	TRUE	0.0109935	No
orf19.2558	950	785	805	1093	881	821	880	560	852	999	824	901	753	783	785	790	836.06	894	778	0.871	-0.199	-2.97	0.00297549	0.00676381	0.00234759	0.00371589	0.00308815	0.00308815	TRUE	0.0688564	No
orf19.2559	2936	2098	2746	3164	4400	3795	4130	2542	2634	2671	2809	2609	3763	3621	3685	3585	3172.26	2681	3664	1.368	0.452	11.586	4.86208e-31	1.83719e-29	0.000352853	0.00243715	0.00113795	0.00113795	TRUE	0.0127625	No
orf19.2560	7859	5367	7160	8394	7977	6872	7414	4871	7050	6833	7325	6922	6822	6557	6616	6870	6874.42	7032	6716	0.955	-0.067	-1.894	0.0582178	0.0959069	0.000531718	0.0021907	0.00105444	0.00105444	TRUE	0.00949787	No
orf19.2563	1508	1057	1290	1656	1618	1406	1619	1016	1353	1346	1320	1366	1384	1342	1445	1433	1373.36	1346	1401	1.04	0.056	1.22	0.222601	0.301621	1e-08	0.00303657	0.00129205	0.00129205	TRUE	0.0097489	No
orf19.2564	1732	1250	1414	1842	2040	1739	1959	1200	1554	1591	1447	1519	1745	1659	1748	1692	1619.41	1528	1711	1.121	0.165	3.557	0.000375543	0.00104167	0.000431824	0.00287596	0.00145511	0.00145511	TRUE	0.0148014	No
orf19.2565	1981	1365	1851	2135	2550	2343	2507	1446	1777	1738	1894	1761	2181	2236	2237	2039	1982.78	1792	2173	1.214	0.28	5.819	5.90508e-09	3.38528e-08	0.000988447	0.00271168	0.00171226	0.00171226	TRUE	0.0190424	No
orf19.2568	7271	4263	5936	7220	6834	5240	6051	4055	6523	5427	6073	5954	5845	5000	5400	5719	5742.52	5994	5491	0.916	-0.127	-1.953	0.0507932	0.0853133	0.0049503	0.00223232	0.00390202	0.00390202	TRUE	0.0488623	No
orf19.257	2	2	0	4	4	3	4	1	2	3	0	3	3	3	4	1	2.36	2	3	1.5	0.585	0.647	0.517663	NA	1e-08	0.61639	0.355189	0.355189	TRUE	0.377103	No
orf19.2570	2457	1629	2042	2416	1982	1728	1912	1149	2204	2074	2089	1992	1695	1649	1706	1621	1878.76	2090	1668	0.799	-0.324	-7	2.55392e-12	2.23022e-11	0.000764263	0.00275221	0.00151587	0.00151587	TRUE	0.0171645	No
orf19.2571	4184	3175	3941	4794	4179	3852	4319	2484	3753	4042	4032	3953	3574	3675	3854	3503	3798.47	3945	3652	0.927	-0.11	-2.5	0.0124183	0.0243901	0.0010926	0.0023617	0.0015916	0.0015916	TRUE	0.0170268	No
orf19.2573	6295	4505	5638	7037	6129	5396	5837	3713	5647	5735	5768	5803	5242	5149	5209	5237	5473.68	5738	5209	0.908	-0.14	-4.935	8.03226e-07	3.43717e-06	1e-08	0.00224474	0.000587081	0.000587081	TRUE	0.00145577	No
orf19.2574	3484	2263	3120	3878	3906	3302	3693	2232	3126	2881	3192	3198	3341	3151	3295	3148	3166.39	3099	3234	1.043	0.061	1.327	0.184348	0.2565	0.00120459	0.002438	0.0016968	0.0016968	TRUE	0.0260349	No
orf19.2575	4841	3297	4121	4988	4112	3627	3907	2502	4343	4197	4216	4113	3517	3461	3486	3529	3857.79	4217	3498	0.829	-0.27	-8.118	4.7252e-16	5.98925e-15	1e-08	0.00235583	0.000799822	0.000799822	TRUE	0.00508923	No
orf19.2579	816	512	714	792	1081	948	1129	679	732	652	730	653	925	905	1007	958	820.2	692	949	1.37	0.454	6.964	3.31862e-12	2.85649e-11	0.00202737	0.00374945	0.00282845	0.00282845	TRUE	0.0222929	No
orf19.258	696	570	647	858	428	397	410	283	624	726	662	708	366	379	366	399	528.67	680	378	0.554	-0.852	-11.585	4.91384e-31	1.84515e-29	0.00161771	0.00472547	0.00312005	0.00312005	TRUE	0.0366366	No
orf19.2580	736	470	608	753	827	744	843	449	660	598	622	621	707	710	752	633	663.04	625	700	1.123	0.167	2.484	0.0129966	0.0254178	0.00152533	0.004169	0.00284909	0.00284909	TRUE	0.0429471	No
orf19.2581	69	45	53	62	95	80	100	62	62	57	54	51	81	76	89	87	69.85	56	83	1.488	0.573	3.464	0.000532612	0.00142727	1e-08	0.0227627	0.0114727	0.0114727	TRUE	0.047662	No
orf19.2582	1641	1145	1404	1754	1939	1850	1916	1106	1472	1458	1436	1446	1658	1765	1710	1560	1563.22	1453	1673	1.154	0.206	4.253	2.11049e-05	7.30403e-05	0.000559115	0.00290818	0.00161507	0.00161507	TRUE	0.0223487	No
orf19.2583	5	2	2	3	9	7	13	4	4	3	2	2	8	7	12	6	5.4	3	8	2.749	1.459	2.317	0.0205116	NA	1e-08	0.271	0.149701	0.149701	TRUE	0.318029	No
orf19.2585	9	15	11	13	9	12	17	19	8	19	11	11	8	11	15	27	13.78	12	15	1.227	0.296	0.663	0.507399	NA	0.126164	0.10731	0.115504	0.115504	TRUE	0.608437	No
orf19.2587	10	3	11	8	6	7	5	6	9	4	11	7	5	7	4	8	6.92	8	6	0.777	-0.364	-0.685	0.493056	NA	1e-08	0.211702	0.124577	0.124577	TRUE	0.176613	No
orf19.259	1393	958	1207	1603	1562	1439	1487	905	1250	1220	1235	1322	1336	1373	1327	1276	1292.28	1257	1328	1.057	0.08	1.634	0.102169	0.155439	0.00030728	0.00310288	0.00151371	0.00151371	TRUE	0.015435	No
orf19.2590	6	4	10	13	13	4	4	10	5	5	10	11	11	4	4	14	8	8	8	0.995	-0.008	-0.013	0.989371	NA	0.172414	0.183345	0.17894	0.17894	TRUE	0.22834	No
orf19.2591	59	46	62	76	51	33	47	29	53	59	63	63	44	31	42	41	49.44	60	40	0.665	-0.589	-2.958	0.00309641	0.00700687	1e-08	0.0313409	0.0170311	0.0170311	TRUE	0.14968	No
orf19.2593	124	75	100	113	94	84	93	69	111	95	102	93	80	80	83	97	92.88	100	85	0.839	-0.253	-1.74	0.0818796	0.129148	1e-08	0.0176089	0.00946637	0.00946637	TRUE	0.065643	No
orf19.2594	5896	3937	4743	6308	4970	4331	4753	2970	5289	5012	4853	5202	4250	4133	4241	4189	4646.12	5089	4203	0.826	-0.276	-7.247	4.24921e-13	4.11762e-12	0.000656747	0.00229198	0.00117734	0.00117734	TRUE	0.0120924	No
orf19.2597	662	458	562	760	708	627	721	431	594	583	575	627	606	598	643	608	604.21	595	614	1.031	0.044	0.703	0.48234	0.567783	1e-08	0.00438217	0.0021122	0.0021122	TRUE	0.01661	No
orf19.2598	1977	1395	1711	2128	2272	2080	2118	1285	1774	1776	1751	1755	1943	1985	1890	1812	1835.62	1764	1908	1.083	0.116	2.7	0.00693734	0.0145023	0.000137564	0.00277037	0.00121671	0.00121671	TRUE	0.01204	No
orf19.2599	2790	1857	2376	2922	2339	1889	2144	1456	2503	2364	2431	2410	2000	1802	1913	2054	2184.63	2427	1942	0.799	-0.324	-6.606	3.9617e-11	3.05153e-10	0.00126367	0.00264403	0.00183798	0.00183798	TRUE	0.028261	No
orf19.26	1574	1076	1387	1801	2122	1983	2055	1365	1412	1370	1419	1485	1815	1892	1834	1925	1643.99	1422	1866	1.31	0.389	8.591	8.59266e-18	1.31027e-16	0.000296118	0.00286256	0.0013489	0.0013489	TRUE	0.0113454	No
orf19.260	6085	4376	5526	6561	6578	6064	6574	3882	5459	5571	5654	5410	5626	5786	5866	5475	5605.89	5524	5688	1.031	0.044	1.24	0.214962	0.292855	0.000426173	0.00223848	0.00101599	0.00101599	TRUE	0.00730234	No
orf19.2600	1355	1068	1241	1551	1203	1164	1234	807	1216	1360	1270	1279	1029	1111	1101	1138	1187.84	1281	1095	0.854	-0.227	-4.152	3.28912e-05	0.000109967	0.00109534	0.00320166	0.00202039	0.00202039	TRUE	0.0203257	No
orf19.2601	10525	7266	9628	11430	10697	9158	9865	6861	9442	9250	9850	9425	9148	8738	8803	9677	9291.81	9492	9092	0.957	-0.063	-1.503	0.132885	0.194868	0.00133177	0.00213576	0.00157869	0.00157869	TRUE	0.0223676	No
orf19.2602	1036	708	1068	1264	994	801	915	609	929	901	1093	1042	850	764	816	859	906.94	991	822	0.828	-0.273	-3.712	0.000205822	0.000598538	0.00446689	0.00358017	0.00406113	0.00406113	TRUE	0.0545904	No
orf19.2604	5240	3442	4473	5592	6324	5295	5911	3611	4701	4382	4576	4611	5408	5052	5275	5093	4887.35	4568	5207	1.14	0.189	4.884	1.04011e-06	4.38218e-06	0.000663294	0.00227656	0.00123007	0.00123007	TRUE	0.00875487	No
orf19.2605	2631	1847	2430	2863	2641	2409	2564	1618	2360	2351	2486	2361	2259	2299	2288	2282	2335.74	2390	2282	0.955	-0.067	-1.761	0.0782914	0.124109	1e-08	0.00260104	0.000948337	0.000948337	TRUE	0.00884689	No
orf19.2606	2468	1766	2129	2611	2151	1989	2107	1415	2214	2248	2178	2153	1840	1898	1880	1996	2050.87	2198	1904	0.865	-0.21	-5.042	4.6106e-07	2.05189e-06	0.000131564	0.00268737	0.00117004	0.00117004	TRUE	0.0115499	No
orf19.2607	806	583	694	967	939	773	895	633	723	742	710	797	803	738	799	893	775.6	743	808	1.083	0.115	1.648	0.0993726	0.15208	0.00274901	0.00385124	0.00338481	0.00338481	TRUE	0.0530197	No
orf19.2608	110910	70472	97786	119433	150148	120586	134822	82223	99498	89718	100045	98486	128411	115059	120306	115968	108436	96937	119936	1.237	0.307	6.191	5.9634e-10	3.91564e-09	0.00253377	0.00199291	0.00235526	0.00235526	TRUE	0.0307562	No
orf19.2609	9164	5928	7809	9529	9664	8023	9319	5670	8221	7547	7989	7858	8265	7655	8316	7997	7981.01	7904	8058	1.019	0.028	0.668	0.504174	0.588742	0.00112916	0.00216142	0.00152839	0.00152839	TRUE	0.0140518	No
orf19.261	1881	1540	1769	2127	1738	1831	1810	1080	1687	1961	1810	1754	1486	1747	1615	1523	1697.96	1803	1593	0.885	-0.176	-2.692	0.00710678	0.0147998	0.00395281	0.00283449	0.00352121	0.00352121	TRUE	0.0515292	No
orf19.2610	1448	982	1186	1483	1320	1044	1093	766	1299	1250	1213	1223	1129	996	975	1080	1145.78	1246	1045	0.838	-0.255	-4.267	1.98297e-05	6.88253e-05	0.00200907	0.00324652	0.00254662	0.00254662	TRUE	0.0383488	No
orf19.2611	2490	1637	2189	2574	2317	1938	2134	1281	2234	2084	2240	2123	1982	1849	1904	1807	2027.71	2170	1886	0.87	-0.201	-4.293	1.76316e-05	6.18393e-05	0.000797387	0.00269545	0.00161563	0.00161563	TRUE	0.0143907	No
orf19.2612	2267	1559	1934	2548	2433	1736	2067	1535	2034	1985	1979	2101	2081	1656	1844	2165	1980.62	2025	1936	0.955	-0.066	-0.862	0.38847	0.477578	0.00706864	0.00271248	0.00512182	0.00512182	TRUE	0.11463	No
orf19.2613	14190	9428	12153	15047	16506	13696	15090	9402	12730	12003	12434	12408	14116	13068	13465	13261	12935.6	12394	13478	1.087	0.121	3.367	0.000760127	0.0019617	0.000758613	0.00209175	0.0011619	0.0011619	TRUE	0.0125744	No
orf19.2614	2142	1479	1932	2424	2263	1910	2120	1425	1922	1883	1977	1999	1935	1822	1892	2010	1929.93	1945	1915	0.982	-0.026	-0.565	0.572229	0.651013	0.000516363	0.00273173	0.00144936	0.00144936	TRUE	0.0124383	No
orf19.2615	457	351	463	535	743	626	743	405	410	447	474	441	635	597	663	571	529.83	443	616	1.399	0.484	6.511	7.45506e-11	5.52281e-10	0.00200604	0.00471944	0.00336581	0.00336581	TRUE	0.0303032	No
orf19.2616	4629	3048	4109	4932	4883	4392	4796	2839	4153	3880	4204	4067	4176	4191	4280	4004	4119.33	4076	4163	1.021	0.031	0.777	0.436943	0.523773	0.000666507	0.00233194	0.00124714	0.00124714	TRUE	0.0120644	No
orf19.2618	7319	4816	6120	7605	9361	7726	8456	5278	6566	6131	6261	6271	8006	7372	7546	7444	6949.65	6307	7592	1.204	0.267	6.738	1.60691e-11	1.28211e-10	0.000935489	0.00218841	0.00136698	0.00136698	TRUE	0.0166902	No
orf19.2619	375	259	347	416	423	416	429	310	336	330	355	343	362	397	383	437	367.87	341	395	1.15	0.201	2.488	0.0128346	0.0251174	0.000815375	0.00592579	0.00356045	0.00356045	TRUE	0.0517917	No
orf19.262	96	82	93	103	95	93	121	66	86	104	95	85	81	89	108	93	92.71	92	93	1.007	0.011	0.071	0.943748	0.959397	1e-08	0.0176388	0.0112998	0.0112998	TRUE	0.13356	No
orf19.2620	190	131	194	264	262	203	255	184	170	167	198	218	224	194	228	260	207.28	188	226	1.19	0.251	2.058	0.0395608	0.0684368	0.00995181	0.00898313	0.00942857	0.00942857	TRUE	0.127172	No
orf19.2621	805	646	708	960	795	833	787	502	722	822	724	792	680	795	702	708	743.2	765	721	0.944	-0.084	-1.171	0.241771	0.323222	0.00319319	0.00393283	0.00353799	0.00353799	TRUE	0.0575881	No
orf19.2622	2566	1818	2135	2671	2251	2154	2175	1297	2302	2315	2184	2203	1925	2055	1941	1829	2094.23	2251	1938	0.862	-0.214	-4.531	5.8696e-06	2.2179e-05	0.000944212	0.00267271	0.00165085	0.00165085	TRUE	0.0197652	No
orf19.2623	13221	9070	12003	14779	15021	13342	14429	9492	11861	11547	12280	12187	12846	12731	12875	13388	12464.4	11969	12960	1.082	0.114	3.444	0.00057241	0.00152305	0.000535214	0.00209599	0.000972271	0.000972271	TRUE	0.00671944	No
orf19.2624	13	8	12	10	5	14	6	3	12	10	12	8	4	13	5	4	8.7	10	6	0.652	-0.617	-1.228	0.219543	NA	0.049395	0.168865	0.122799	0.122799	TRUE	1.1505	No
orf19.2625	1	0	0	0	1	2	2	0	1	0	0	0	1	2	2	0	0.68	0	1	3.931	1.975	1.148	0.250807	NA	1e-08	2.13474	1.41423	1.41423	TRUE	0.289596	No
orf19.2629	1124	835	985	1176	1181	1149	1264	736	1008	1063	1008	970	1010	1096	1128	1038	1040.15	1012	1068	1.058	0.081	1.432	0.152006	0.218064	0.00110336	0.00337518	0.00210163	0.00210163	TRUE	0.0179554	No
orf19.2630	555	405	469	614	649	655	590	372	498	516	480	506	555	625	526	525	528.85	500	558	1.118	0.161	2.169	0.0301113	0.0537778	0.00214038	0.00472452	0.00340845	0.00340845	TRUE	0.0774143	No
orf19.2631	965	788	944	1082	1311	1287	1251	815	866	1003	966	892	1121	1228	1116	1149	1042.75	932	1154	1.241	0.312	4.992	5.97953e-07	2.61463e-06	0.00204777	0.00337171	0.0027682	0.0027682	TRUE	0.0299719	No
orf19.263.1	8866	5947	7428	9434	7503	5863	6582	3739	7954	7571	7600	7779	6417	5594	5873	5274	6757.73	7726	5790	0.75	-0.415	-7.256	3.99147e-13	3.88038e-12	0.00356782	0.00219434	0.00299628	0.00299628	TRUE	0.0650564	No
orf19.2633	3279	2180	2998	3786	3499	2988	3282	2188	2942	2775	3067	3122	2992	2851	2929	3086	2970.54	2976	2964	0.994	-0.008	-0.17	0.864928	0.897339	0.00129389	0.00246822	0.0018697	0.0018697	TRUE	0.0240901	No
orf19.2633.1	210	126	155	191	236	217	230	140	188	160	159	158	202	207	205	197	184.56	166	203	1.22	0.287	2.716	0.00659837	0.0138952	1e-08	0.00984533	0.00526676	0.00526676	TRUE	0.0920214	No
orf19.2637	928	672	819	1070	1217	1136	1164	694	833	856	838	882	1041	1084	1039	979	943.82	852	1036	1.217	0.284	5.278	1.30419e-07	6.2987e-07	1e-08	0.00351764	0.00170838	0.00170838	TRUE	0.0139436	No
orf19.2638	591	401	536	665	467	443	460	300	530	511	548	548	399	423	410	423	474.14	534	414	0.772	-0.373	-5.539	3.04585e-08	1.58988e-07	1e-08	0.00504126	0.00222144	0.00222144	TRUE	0.00919529	No
orf19.2638.1	3370	2377	2760	3448	2999	2620	2603	1476	3023	3026	2824	2843	2565	2500	2323	2082	2648.21	2929	2368	0.81	-0.305	-4.724	2.31111e-06	9.30018e-06	0.00437199	0.0025277	0.0036086	0.0036086	TRUE	0.0763314	No
orf19.2639	1283	910	1167	1408	1774	1532	1725	1026	1151	1159	1194	1161	1517	1462	1539	1447	1328.73	1166	1491	1.281	0.357	7.802	6.09879e-15	6.99266e-14	1e-08	0.00307207	0.00124791	0.00124791	TRUE	0.00554471	No
orf19.2639.1	1434	1024	1188	1439	1255	1147	1199	625	1286	1304	1215	1187	1073	1094	1070	882	1138.92	1248	1030	0.829	-0.271	-3.843	0.000121728	0.000366404	0.00456331	0.00325416	0.00389951	0.00389951	TRUE	0.102586	No
orf19.264	937	755	859	1137	881	940	1004	603	841	961	879	938	753	897	896	850	876.87	905	849	0.939	-0.091	-1.248	0.212021	0.289439	0.00413225	0.00363507	0.00390796	0.00390796	TRUE	0.0728383	No
orf19.2640	1793	1234	1547	1817	1693	1574	1560	913	1609	1571	1583	1498	1448	1502	1392	1288	1486.26	1565	1408	0.902	-0.15	-2.708	0.00675884	0.0141933	0.00166976	0.00295627	0.00224832	0.00224832	TRUE	0.0355391	No
orf19.2641	117	98	123	137	135	114	125	70	105	125	126	113	115	109	112	99	112.88	117	109	0.937	-0.094	-0.711	0.477297	0.562665	1e-08	0.0148401	0.00786118	0.00786118	TRUE	0.0504849	No
orf19.2642	70	40	63	55	35	49	51	28	63	51	64	45	30	47	46	39	48.15	56	40	0.723	-0.469	-2.135	0.0327866	0.05797	0.0151033	0.0321276	0.0249599	0.0249599	TRUE	0.277021	No
orf19.2643	5559	3682	4780	5872	5342	4441	5065	3075	4987	4688	4890	4842	4569	4237	4520	4337	4633.74	4852	4416	0.91	-0.136	-3.477	0.000506386	0.00136613	0.000660035	0.00229281	0.00124566	0.00124566	TRUE	0.00937309	No
orf19.2644	2728	1948	2533	3014	2837	2685	2665	1956	2447	2480	2592	2485	2426	2562	2378	2759	2516.16	2501	2531	1.01	0.015	0.284	0.776636	0.824915	0.00186994	0.00255647	0.00224293	0.00224293	TRUE	0.0420763	No
orf19.2645	42	30	41	45	40	50	35	27	38	38	42	37	34	48	31	38	38.27	39	38	0.974	-0.038	-0.168	0.866831	0.898227	1e-08	0.0399131	0.0228332	0.0228332	TRUE	0.252266	No
orf19.2646	1910	1483	1836	2154	1871	2001	2141	1261	1713	1888	1878	1776	1600	1909	1910	1779	1806.82	1814	1800	0.993	-0.011	-0.163	0.870858	0.901119	0.00404994	0.00278298	0.00351988	0.00351988	TRUE	0.0700026	No
orf19.2647	114	107	128	140	131	141	135	82	102	136	131	115	112	135	120	116	120.95	121	121	1.003	0.005	0.033	0.973493	0.981398	0.00362708	0.0139822	0.00956509	0.00956509	TRUE	0.11472	No
orf19.2649	194	158	168	229	267	273	334	169	174	201	172	189	228	260	298	238	220.14	184	256	1.4	0.485	4.324	1.5356e-05	5.44621e-05	0.00619583	0.00857389	0.00742549	0.00742549	TRUE	0.140551	No
orf19.265	3696	3109	3477	4363	5820	5882	5786	3606	3316	3958	3557	3598	4977	5612	5163	5086	4408.47	3607	5210	1.445	0.531	8.901	5.53586e-19	9.29035e-18	0.00382024	0.00230882	0.00318787	0.00318787	TRUE	0.0510692	No
orf19.2650	1179	1034	1137	1331	957	1128	1099	679	1058	1316	1163	1098	818	1076	981	958	1058.5	1159	958	0.828	-0.272	-3.008	0.00263362	0.00606005	0.00971656	0.00335099	0.00691964	0.00691964	TRUE	0.119434	No
orf19.2650.1	396	226	318	433	494	369	465	206	355	288	325	357	422	352	415	291	350.68	331	370	1.12	0.163	1.366	0.171917	0.242346	0.0159171	0.00611921	0.0108138	0.0108138	TRUE	0.215772	No
orf19.2651	3771	2910	3317	4271	3548	3566	3520	2213	3383	3705	3394	3522	3034	3403	3141	3121	3337.8	3501	3175	0.907	-0.14	-2.838	0.00453526	0.00988315	0.00176651	0.00241445	0.00203939	0.00203939	TRUE	0.0287504	No
orf19.2652	148	121	125	150	95	106	118	62	133	154	128	124	81	101	105	87	114.19	135	94	0.702	-0.51	-3.631	0.000282033	0.00080078	0.00305327	0.0146925	0.009878	0.009878	TRUE	0.0958831	No
orf19.2653	2360	1788	2178	2751	2485	2546	2559	1619	2117	2276	2228	2269	2125	2429	2283	2283	2251.47	2222	2280	1.026	0.037	0.728	0.466678	0.552583	0.00168235	0.0026243	0.00204179	0.00204179	TRUE	0.0265169	No
orf19.2654	3205	2554	2992	3571	3420	3528	3554	2110	2875	3252	3061	2945	2925	3366	3171	2976	3071.38	3033	3110	1.026	0.038	0.648	0.51667	0.600417	0.0029193	0.00245218	0.00289264	0.00289264	TRUE	0.037646	No
orf19.2655	18199	13371	17100	20815	24787	23324	24963	14754	16326	17023	17495	17164	21199	22255	22275	20809	19318.3	17002	21634	1.273	0.348	9.322	1.14089e-20	2.16914e-19	0.000942224	0.00205467	0.00128504	0.00128504	TRUE	0.0088154	No
orf19.2657	30	16	23	25	22	32	28	20	27	20	24	21	19	31	25	28	24.25	23	26	1.107	0.147	0.52	0.603103	0.678708	1e-08	0.0618523	0.0356991	0.0356991	TRUE	0.233057	No
orf19.2660	2742	2254	2613	3258	3036	3255	3287	2209	2460	2870	2673	2687	2596	3106	2933	3116	2805.05	2672	2938	1.099	0.136	2.012	0.0442144	0.0755517	0.00489579	0.00249705	0.00405047	0.00405047	TRUE	0.0752186	No
orf19.2661	1167	661	979	1327	1402	1053	1151	699	1047	842	1002	1094	1199	1005	1027	986	1025.13	996	1054	1.057	0.081	0.91	0.362961	0.451671	0.00875839	0.00339564	0.00655639	0.00655639	TRUE	0.125073	No
orf19.2662	228	110	168	230	212	180	194	114	205	140	172	190	181	172	173	161	174.14	177	172	0.968	-0.047	-0.377	0.706115	0.767011	0.00711347	0.0103162	0.00893762	0.00893762	TRUE	0.180917	No
orf19.2663	709	482	634	771	794	668	815	465	636	614	649	636	679	637	727	656	654.2	634	675	1.066	0.092	1.461	0.144076	0.20838	1e-08	0.00419856	0.0023169	0.0023169	TRUE	0.0334484	No
orf19.2664	1837	1478	1740	2025	2568	2423	2558	1618	1648	1882	1780	1670	2196	2312	2283	2282	2006.56	1745	2268	1.302	0.381	7.475	7.71379e-14	7.88171e-13	0.00148116	0.002703	0.00198257	0.00198257	TRUE	0.0319983	No
orf19.2665	25075	17657	22993	27412	39545	35601	38783	23638	22495	22479	23524	22604	33820	33969	34607	33339	28354.8	22776	33934	1.49	0.575	20.483	3.04883e-93	1.66522e-90	0.000312937	0.00203072	0.000721054	0.000721054	TRUE	0.00598078	No
orf19.2667	13427	8789	11369	14156	11398	9230	10163	5968	12045	11189	11632	11673	9748	8807	9069	8417	10322.6	11635	9010	0.775	-0.368	-7.54	4.70605e-14	4.92578e-13	0.00225317	0.00212016	0.00219345	0.00219345	TRUE	0.0372083	No
orf19.2668	1321	955	1121	1402	1099	946	996	707	1185	1216	1147	1156	940	903	889	997	1054.04	1176	932	0.791	-0.338	-6.317	2.67142e-10	1.84481e-09	0.000418991	0.00335679	0.00178709	0.00178709	TRUE	0.0226944	No
orf19.2669	1915	1421	1886	2040	1653	1511	1691	1034	1718	1809	1930	1682	1414	1442	1509	1458	1620.19	1785	1456	0.816	-0.293	-5.364	8.15631e-08	4.0465e-07	0.00180395	0.00287553	0.00223162	0.00223162	TRUE	0.0367454	No
orf19.267	3006	2006	2688	3271	3106	2788	2964	1951	2697	2554	2750	2697	2656	2660	2645	2752	2676.39	2674	2678	1	0	-0.011	0.990949	0.992932	0.00016767	0.00252193	0.00105768	0.00105768	TRUE	0.0103359	No
orf19.2670	1481	1046	1297	1608	1383	1240	1299	815	1329	1332	1327	1326	1183	1183	1159	1149	1248.47	1328	1168	0.881	-0.183	-4.177	2.95964e-05	9.98399e-05	1e-08	0.0031423	0.00104902	0.00104902	TRUE	0.00122352	No
orf19.2671	574	389	518	598	545	441	457	363	515	495	530	493	466	421	408	512	479.99	508	452	0.884	-0.178	-2.204	0.0275291	0.0496979	0.00329575	0.00500396	0.00415254	0.00415254	TRUE	0.0810239	No
orf19.2672	2611	1842	2443	2940	2730	2450	2582	1696	2342	2345	2499	2424	2335	2338	2304	2392	2372.47	2402	2342	0.974	-0.038	-0.974	0.330215	0.417304	0.0001543	0.00259142	0.00106775	0.00106775	TRUE	0.00864966	No
orf19.2673	663	499	516	725	474	463	457	248	595	635	528	598	405	442	408	350	495.07	589	401	0.685	-0.546	-6.464	1.02272e-10	7.44788e-10	0.00458788	0.00491184	0.00475017	0.00475017	TRUE	0.0726569	No
orf19.2674	381	255	375	434	413	292	342	240	342	325	384	358	353	279	305	338	335.44	352	319	0.903	-0.147	-1.542	0.123052	0.182317	0.00503742	0.00630733	0.00570085	0.00570085	TRUE	0.0835665	No
orf19.2675	1954	1426	1796	2227	1887	1698	1844	1167	1753	1815	1837	1836	1614	1620	1645	1646	1720.96	1810	1631	0.901	-0.151	-3.704	0.000212178	0.000615234	1e-08	0.00282306	0.00100651	0.00100651	TRUE	0.00584382	No
orf19.2676	1872	1403	1610	2124	1979	1749	1845	1267	1679	1786	1647	1751	1693	1669	1646	1787	1707.36	1716	1699	0.989	-0.016	-0.346	0.728996	0.787877	0.000575046	0.00282978	0.00153883	0.00153883	TRUE	0.0132902	No
orf19.2677	316	213	281	361	363	327	376	262	283	271	287	298	310	312	336	370	308.42	285	332	1.156	0.209	2.406	0.0161488	0.0307909	1e-08	0.00668646	0.00396089	0.00396089	TRUE	0.0556305	No
orf19.2678	514	344	449	526	726	573	659	438	461	438	459	434	621	547	588	618	520.7	448	594	1.322	0.403	5.797	6.76707e-09	3.84277e-08	1e-08	0.00476749	0.00269121	0.00269121	TRUE	0.0332681	No
orf19.268	553	320	477	575	566	461	530	333	496	407	488	474	484	440	473	470	466.52	466	467	0.997	-0.004	-0.056	0.955283	0.968011	0.00201862	0.00509126	0.0036575	0.0036575	TRUE	0.0746847	No
orf19.2680	1914	1287	1711	2011	1992	1714	1821	1211	1717	1638	1751	1658	1704	1635	1625	1708	1679.55	1691	1668	0.985	-0.021	-0.486	0.626896	0.698644	0.000194128	0.00284386	0.00127765	0.00127765	TRUE	0.00650695	No
orf19.2681	113	74	107	145	106	86	106	63	101	94	109	120	91	82	95	89	97.6	106	89	0.835	-0.261	-1.827	0.0677411	0.109671	1e-08	0.0168539	0.00927107	0.00927107	TRUE	0.0777956	No
orf19.2682	3079	2117	2605	3250	2891	2683	2910	1583	2762	2695	2665	2680	2472	2560	2597	2233	2583.05	2700	2466	0.915	-0.129	-2.536	0.0112187	0.0223332	0.001813	0.00254153	0.00209241	0.00209241	TRUE	0.0457106	No
orf19.2684	1456	1176	1336	1560	1866	1854	1941	1128	1306	1497	1367	1286	1596	1769	1732	1591	1518.06	1364	1672	1.229	0.297	4.796	1.61858e-06	6.61975e-06	0.00305384	0.00293581	0.003025	0.003025	TRUE	0.0494907	No
orf19.2685	286	213	265	330	321	307	299	238	257	271	271	272	275	293	267	336	280.12	268	293	1.085	0.117	1.262	0.206941	0.283147	0.00160948	0.00716201	0.00472109	0.00472109	TRUE	0.0943357	No
orf19.2686	2325	1657	2140	2548	2340	2121	2202	1516	2086	2110	2189	2101	2001	2024	1965	2138	2076.75	2122	2032	0.956	-0.064	-1.517	0.129166	0.189925	0.000274152	0.00267855	0.00124862	0.00124862	TRUE	0.0134819	No
orf19.2687.1	5232	3539	4254	5522	4727	4066	4203	2461	4694	4506	4352	4554	4043	3880	3750	3471	4156.1	4526	3786	0.837	-0.256	-5.022	5.10384e-07	2.26135e-06	0.00219677	0.00232882	0.00225604	0.00225604	TRUE	0.0365644	No
orf19.2688	15274	11701	14177	17543	15612	15136	16085	10202	13702	14897	14504	14466	13352	14442	14353	14389	14263.2	14392	14134	0.982	-0.026	-0.645	0.519186	0.602408	0.00112368	0.0020813	0.00150621	0.00150621	TRUE	0.0171257	No
orf19.269	4806	3145	4067	4994	4359	3994	4151	2791	4311	4004	4161	4118	3728	3811	3704	3936	3971.74	4148	3795	0.913	-0.131	-3.404	0.000663274	0.00173334	0.000515946	0.00234503	0.00115959	0.00115959	TRUE	0.00853961	No
orf19.2690	9454	6786	8615	10218	9652	8819	9507	6244	8481	8639	8814	8426	8255	8415	8483	8807	8539.99	8590	8490	0.988	-0.017	-0.528	0.597552	0.674323	0.000415276	0.00214951	0.000929754	0.000929754	TRUE	0.00739558	No
orf19.2691	979	741	858	1048	1018	972	979	731	878	943	878	864	871	927	874	1031	908.29	891	926	1.037	0.052	0.79	0.429251	0.516304	0.00260464	0.0035778	0.00302329	0.00302329	TRUE	0.0635039	No
orf19.2693	2568	1681	2023	2611	2146	1846	1969	1151	2304	2140	2070	2153	1835	1761	1757	1623	1955.47	2167	1744	0.806	-0.311	-5.926	3.10937e-09	1.84414e-08	0.00162236	0.0027219	0.00212099	0.00212099	TRUE	0.0241351	No
orf19.2694	5977	4060	5208	6357	6547	5720	6138	3697	5362	5169	5328	5242	5599	5458	5477	5214	5356.2	5275	5437	1.031	0.045	1.298	0.194341	0.267875	0.000326873	0.00225055	0.000941328	0.000941328	TRUE	0.00872372	No
orf19.2695	3217	2282	2840	3426	3680	3381	3602	2171	2886	2905	2906	2825	3147	3226	3214	3062	3021.43	2880	3162	1.099	0.137	3.861	0.000112974	0.000342284	1e-08	0.00245999	0.000869595	0.000869595	TRUE	0.00497555	No
orf19.2697	960	721	895	1034	1148	1087	1141	687	861	918	916	853	982	1037	1018	969	944.19	887	1002	1.133	0.18	3.329	0.000870023	0.00221487	1e-08	0.00351703	0.00173709	0.00173709	TRUE	0.00822647	No
orf19.2698	483	321	400	528	539	487	534	304	433	409	409	435	461	465	477	429	439.69	422	458	1.087	0.12	1.704	0.0883876	0.137787	1e-08	0.00528117	0.00251005	0.00251005	TRUE	0.0172857	No
orf19.2699	3428	2092	3090	3629	3394	2739	3107	1907	3075	2663	3161	2993	2903	2613	2772	2690	2858.85	2973	2744	0.923	-0.116	-1.958	0.0502301	0.0845329	0.00323153	0.00248732	0.00301404	0.00301404	TRUE	0.0578462	No
orf19.27	1626	1111	1448	1787	1896	1604	1809	1189	1459	1414	1481	1474	1622	1530	1614	1677	1533.92	1457	1611	1.103	0.142	3.106	0.00189757	0.0045026	0.000173072	0.00292592	0.00134684	0.00134684	TRUE	0.0133748	No
orf19.270	611	367	476	629	413	316	317	230	548	467	487	519	353	302	283	324	410.38	505	316	0.623	-0.684	-7.667	1.764e-14	1.91648e-13	0.0045669	0.00551699	0.00505236	0.00505236	TRUE	0.0833092	No
orf19.2701	2891	2155	2430	3111	2932	2679	2535	1733	2594	2744	2486	2565	2508	2556	2262	2444	2519.83	2597	2442	0.941	-0.088	-1.708	0.0875686	0.136652	0.00171879	0.00255563	0.00213655	0.00213655	TRUE	0.0310389	No
orf19.2703	4773	3179	4116	5042	5572	4691	5270	3273	4282	4047	4211	4158	4765	4476	4703	4616	4407.26	4174	4640	1.111	0.152	4.204	2.62382e-05	8.92129e-05	0.000341889	0.00230891	0.00103101	0.00103101	TRUE	0.00713888	No
orf19.2704	4	4	3	7	2	4	3	2	4	5	3	6	2	4	3	3	3.57	4	3	0.623	-0.683	-0.949	0.342483	NA	1e-08	0.408798	0.201213	0.201213	TRUE	0.113968	No
orf19.2706	682	434	564	779	608	553	570	400	612	553	577	642	520	528	509	564	563.02	596	530	0.884	-0.178	-2.535	0.0112447	0.0223628	0.0013396	0.00455793	0.00294575	0.00294575	TRUE	0.0331088	No
orf19.2707.1	1931	1205	1494	1871	2067	1418	1569	1108	1732	1534	1529	1543	1768	1353	1400	1563	1552.67	1584	1521	0.96	-0.06	-0.711	0.477347	0.562665	0.00873473	0.00291449	0.00609908	0.00609908	TRUE	0.148413	No
orf19.2708	2393	1605	1995	2581	2343	2066	2185	1443	2147	2043	2041	2128	2004	1971	1950	2035	2039.95	2090	1990	0.951	-0.073	-1.818	0.0691333	0.111531	1e-08	0.00269116	0.00106459	0.00106459	TRUE	0.00398597	No
orf19.2709	13082	8458	10828	13371	12457	10702	11615	7308	11736	10768	11078	11026	10654	10212	10364	10307	10768.1	11152	10384	0.931	-0.103	-2.862	0.00420987	0.00921752	0.000727289	0.00211434	0.00115221	0.00115221	TRUE	0.0152547	No
orf19.271	105	68	99	128	71	63	84	49	94	87	101	106	61	60	75	69	81.56	97	66	0.679	-0.559	-3.556	0.000376301	0.00104281	1e-08	0.019778	0.011089	0.011089	TRUE	0.0841347	No
orf19.2710	4402	3052	3630	4583	4553	4036	4442	2258	3949	3886	3714	3779	3894	3851	3964	3185	3777.62	3832	3724	0.973	-0.04	-0.604	0.545829	0.627145	0.00500375	0.00236381	0.00388448	0.00388448	TRUE	0.112134	No
orf19.2711	7693	4989	6646	8028	7602	6535	7165	4133	6901	6352	6800	6620	6501	6235	6394	5829	6454.03	6668	6240	0.936	-0.095	-2.108	0.035046	0.0615303	0.00156224	0.00220445	0.00179974	0.00179974	TRUE	0.0231999	No
orf19.2711.1	211	149	217	226	197	179	177	116	189	190	222	186	168	171	158	164	181.02	197	165	0.84	-0.251	-2.339	0.0193399	0.0360797	1e-08	0.00999895	0.00548037	0.00548037	TRUE	0.0798001	No
orf19.2712	9628	6443	8365	10215	10876	9470	10241	6073	8637	8203	8558	8423	9301	9036	9138	8565	8732.86	8455	9010	1.066	0.092	2.531	0.0113811	0.0225892	0.000715714	0.00214576	0.00115983	0.00115983	TRUE	0.0130541	No
orf19.2713	74	43	68	91	59	55	58	49	66	55	70	75	50	52	52	69	61.19	66	56	0.824	-0.28	-1.52	0.128601	0.189371	1e-08	0.0257029	0.0160422	0.0160422	TRUE	0.159122	No
orf19.2715	5092	3450	4463	5560	5595	4991	5479	3214	4568	4392	4566	4585	4785	4762	4889	4533	4635.08	4528	4742	1.048	0.067	1.866	0.0621104	0.10152	0.000409438	0.00229272	0.00103817	0.00103817	TRUE	0.0100694	No
orf19.2717	15667	10930	13225	17004	16771	15058	15637	8737	14055	13915	13530	14022	14343	14368	13953	12323	13813.7	13880	13747	0.991	-0.013	-0.263	0.792221	0.837822	0.00218868	0.00208461	0.00243401	0.00243401	TRUE	0.058762	No
orf19.272	3394	2499	3087	3868	2394	2254	2424	1579	3045	3181	3158	3190	2047	2151	2163	2227	2645.29	3144	2147	0.682	-0.552	-13.596	4.20062e-42	2.9691e-40	0.000400107	0.00252831	0.00118697	0.00118697	TRUE	0.0120677	No
orf19.2720	6011	3931	5086	6231	6055	5245	5753	4136	5392	5005	5203	5138	5178	5005	5134	5833	5236.1	5184	5288	1.019	0.027	0.509	0.611087	0.685476	0.00247879	0.00225677	0.00246427	0.00246427	TRUE	0.0573271	No
orf19.2721	3761	2673	3262	4111	3544	3235	3305	2169	3374	3403	3337	3390	3031	3087	2949	3059	3203.8	3376	3032	0.898	-0.156	-4.63	3.66484e-06	1.42329e-05	1e-08	0.00243264	0.000773493	0.000773493	TRUE	0.00420186	No
orf19.2722	555	435	496	577	723	668	696	398	498	554	507	476	618	637	621	561	559.13	509	609	1.206	0.27	3.828	0.00012915	0.000387191	0.00116302	0.00457586	0.00298786	0.00298786	TRUE	0.0376807	No
orf19.2723	2913	2334	2616	3330	2769	2725	2840	1980	2613	2971	2676	2746	2368	2600	2534	2793	2662.77	2752	2574	0.935	-0.097	-1.628	0.103477	0.156992	0.0034343	0.00252471	0.00305501	0.00305501	TRUE	0.0381721	No
orf19.2724	38805	32078	36574	47415	58125	58917	61853	41939	34812	40839	37419	39099	49710	56217	55194	59151	46555.1	38042	55068	1.448	0.534	8.512	1.70338e-17	2.51448e-16	0.00481328	0.00201071	0.00375321	0.00375321	TRUE	0.052588	No
orf19.2725	9	6	7	14	6	12	5	10	8	8	7	12	5	11	4	14	8.7	9	8	0.972	-0.041	-0.082	0.935037	NA	0.0628787	0.168923	0.126435	0.126435	TRUE	0.210783	No
orf19.2726	4556	3345	4138	5290	4309	3895	4249	2632	4087	4259	4234	4362	3685	3716	3792	3712	3980.87	4236	3726	0.88	-0.185	-5.315	1.06704e-07	5.21201e-07	0.000261565	0.00234419	0.000905132	0.000905132	TRUE	0.00701624	No
orf19.2727	4546	3124	3814	4915	4548	4225	4265	2855	4078	3977	3902	4053	3890	4031	3806	4027	3970.5	4002	3938	0.983	-0.025	-0.686	0.492497	0.577576	0.000348296	0.00234514	0.000997331	0.000997331	TRUE	0.00629076	No
orf19.2728	1000	720	924	1117	881	889	918	506	897	917	945	921	753	848	819	714	851.84	920	784	0.854	-0.227	-3.59	0.000330185	0.000927419	0.0017085	0.00368372	0.00266018	0.00266018	TRUE	0.0369591	No
orf19.273	1269	1020	1166	1461	1362	1316	1394	939	1138	1299	1193	1205	1165	1256	1244	1324	1227.94	1209	1247	1.031	0.045	0.763	0.445584	0.531903	0.00180294	0.00316175	0.00246975	0.00246975	TRUE	0.028084	No
orf19.2730	1566	912	1387	1625	2418	1715	2096	1483	1405	1161	1419	1340	2068	1636	1870	2092	1623.91	1331	1916	1.437	0.523	6.046	1.48642e-09	9.22562e-09	0.0092055	0.00287348	0.0065583	0.0065583	TRUE	0.117415	No
orf19.2731	179	122	137	135	147	122	117	57	161	155	140	111	126	116	104	80	124.29	142	106	0.763	-0.39	-2.407	0.0160921	0.0307022	0.0212027	0.0136596	0.0170407	0.0170407	TRUE	0.238559	No
orf19.2733	718	639	629	810	829	765	795	491	644	814	644	668	709	730	709	693	701.24	692	710	1.03	0.043	0.545	0.585543	0.663888	0.00474871	0.00404971	0.00448462	0.00448462	TRUE	0.15332	No
orf19.2734	176	147	145	194	114	103	100	68	158	187	148	160	97	98	89	96	129.28	163	95	0.585	-0.773	-6.031	1.63009e-09	1.00143e-08	1e-08	0.0132082	0.00745381	0.00745381	TRUE	0.0872922	No
orf19.2735	11714	8551	10436	12946	11850	11019	11883	7323	10509	10886	10677	10675	10134	10514	10604	10328	10541	10687	10395	0.973	-0.04	-1.373	0.169759	0.239754	0.000178668	0.00211724	0.000702373	0.000702373	TRUE	0.00361867	No
orf19.2736	1138	792	992	1164	903	801	882	557	1021	1008	1015	960	772	764	787	786	889.15	1001	777	0.777	-0.364	-6.982	2.9201e-12	2.5316e-11	1e-08	0.00361221	0.00147371	0.00147371	TRUE	0.0099971	No
orf19.2737	6447	4168	5621	6921	8395	6930	7605	5080	5784	5306	5751	5707	7180	6612	6786	7165	6286.38	5637	6936	1.23	0.298	6.765	1.33302e-11	1.07356e-10	0.00139356	0.00221045	0.00170317	0.00170317	TRUE	0.0185094	No
orf19.2738	4483	3089	4166	5189	3229	2865	3144	2100	4022	3933	4262	4279	2762	2734	2805	2962	3469.76	4124	2816	0.682	-0.553	-12.346	5.13989e-35	2.51061e-33	0.00113981	0.00239791	0.00162444	0.00162444	TRUE	0.0138429	No
orf19.2739	344	216	312	392	307	289	311	181	309	275	319	323	263	276	278	255	287.15	306	268	0.872	-0.197	-2.264	0.0235834	0.0433035	1e-08	0.00703516	0.0038216	0.0038216	TRUE	0.046828	No
orf19.274	296	244	266	349	499	452	526	269	266	311	272	288	427	431	469	379	355.37	284	426	1.513	0.598	6.742	1.56173e-11	1.24772e-10	0.0029405	0.00606461	0.00461578	0.00461578	TRUE	0.0552131	No
orf19.2740	772	561	725	870	659	605	668	416	693	714	742	717	564	577	596	587	648.7	716	581	0.811	-0.303	-5.129	2.91843e-07	1.33745e-06	1e-08	0.00421738	0.00179493	0.00179493	TRUE	0.00666334	No
orf19.2742	143	88	105	136	135	94	108	49	128	112	107	112	115	90	96	69	103.82	115	92	0.816	-0.293	-1.865	0.0621829	0.101578	0.0114621	0.015963	0.0140983	0.0140983	TRUE	0.26606	No
orf19.2743	813	471	675	803	1197	922	1006	773	729	600	691	662	1024	880	898	1090	821.64	670	973	1.446	0.532	6.274	3.51942e-10	2.38923e-09	0.00704601	0.00374636	0.00563212	0.00563212	TRUE	0.0736113	No
orf19.2745	14	15	10	18	20	17	21	11	13	19	10	15	17	16	19	16	15.54	14	17	1.212	0.277	0.803	0.42221	0.509775	1e-08	0.0954048	0.0496303	0.0496303	TRUE	0.173453	No
orf19.2746	2155	1845	2104	2583	2523	2607	2658	1418	1933	2349	2153	2130	2158	2488	2372	2000	2197.72	2141	2254	1.055	0.077	0.998	0.318326	0.405277	0.00706245	0.00264007	0.00522056	0.00522056	TRUE	0.0672772	No
orf19.2747	885	749	885	1062	923	1046	1125	739	794	954	905	876	789	998	1004	1042	920.29	882	958	1.086	0.119	1.311	0.189734	0.262776	0.00962689	0.00355697	0.00677839	0.00677839	TRUE	0.172584	No
orf19.2748	1138	1048	1082	1375	1392	1582	1567	949	1021	1334	1107	1134	1190	1509	1398	1338	1254.09	1149	1359	1.185	0.244	2.712	0.00668851	0.0140653	0.010366	0.0031371	0.00699581	0.00699581	TRUE	0.136759	No
orf19.2749	5188	4240	4838	6011	5668	6031	6434	3841	4654	5398	4950	4957	4847	5755	5741	5417	5214.92	4990	5440	1.091	0.125	1.943	0.052075	0.087101	0.00467991	0.0022579	0.00379445	0.00379445	TRUE	0.0664934	No
orf19.275	575	413	437	552	463	362	381	227	516	526	447	455	396	345	340	320	418.18	486	350	0.725	-0.464	-5.163	2.42868e-07	1.12502e-06	0.0051103	0.00545101	0.00528195	0.00528195	TRUE	0.0907041	No
orf19.2751	1053	888	1043	1258	1022	1118	1151	637	945	1131	1067	1037	874	1067	1027	898	1005.74	1045	966	0.927	-0.109	-1.366	0.172071	0.242449	0.00620841	0.00342294	0.00511938	0.00511938	TRUE	0.0580366	No
orf19.2752	2053	1559	1982	2276	2150	2164	2305	1391	1842	1985	2028	1877	1839	2065	2057	1962	1956.68	1933	1981	1.026	0.036	0.671	0.502524	0.587271	0.00204813	0.00272144	0.00231407	0.00231407	TRUE	0.0295977	No
orf19.2753	1931	1465	1802	2177	2106	2040	2206	1375	1732	1865	1844	1795	1801	1947	1968	1939	1861.45	1809	1914	1.058	0.082	1.725	0.0844642	0.132635	0.000885421	0.0027594	0.00161219	0.00161219	TRUE	0.0200053	No
orf19.2754	509	371	427	549	527	494	473	375	457	472	437	453	451	471	422	529	461.45	455	468	1.025	0.036	0.45	0.652383	0.721295	0.00228137	0.00512551	0.00382558	0.00382558	TRUE	0.0769725	No
orf19.2755	5863	4430	5068	6506	5445	5081	5411	3402	5260	5640	5185	5365	4657	4848	4828	4798	5072.63	5362	4783	0.892	-0.164	-4.377	1.20079e-05	4.31738e-05	0.000589693	0.00226571	0.00115612	0.00115612	TRUE	0.014198	No
orf19.2756	165	213	171	266	193	310	271	129	148	271	175	219	165	296	242	182	212.26	203	221	1.093	0.128	0.627	0.530552	0.613228	0.0650511	0.00881867	0.0350798	0.0350798	TRUE	0.399491	No
orf19.2757	715	690	680	906	670	696	678	518	641	878	696	747	573	664	605	731	691.92	740	643	0.868	-0.205	-1.993	0.0462402	0.0784776	0.0132751	0.00407759	0.00866828	0.00866828	TRUE	0.178144	No
orf19.2758	267	199	248	288	414	335	360	269	240	253	254	237	354	320	321	379	294.81	246	344	1.393	0.479	5.363	8.18593e-08	4.0545e-07	1e-08	0.00690379	0.00416	0.00416	TRUE	0.0469397	No
orf19.276	723	593	707	867	897	858	862	538	649	755	723	715	767	819	769	759	744.45	710	778	1.099	0.136	2.143	0.0320774	0.0568666	0.00119954	0.00392954	0.00251482	0.00251482	TRUE	0.041392	No
orf19.2760	1955	1685	1892	2176	1950	2103	2125	1189	1754	2145	1936	1794	1668	2007	1896	1677	1859.57	1907	1812	0.952	-0.071	-0.898	0.368989	0.457561	0.00754741	0.00276019	0.00553704	0.00553704	TRUE	0.0835075	No
orf19.2761	328	230	260	334	253	291	290	185	294	293	266	275	216	278	259	261	267.78	282	254	0.897	-0.158	-1.604	0.108607	0.163536	0.00332324	0.00740079	0.00550533	0.00550533	TRUE	0.118692	No
orf19.2762	13730	9615	11388	14740	15534	13772	14189	9355	12317	12241	11651	12155	13285	13141	12661	13194	12580.7	12091	13070	1.081	0.112	3.502	0.000462005	0.00125769	0.000431236	0.00209491	0.000906382	0.000906382	TRUE	0.00732195	No
orf19.2763	151	157	164	234	139	148	131	59	135	200	168	193	119	141	117	83	144.54	174	115	0.669	-0.58	-3.506	0.000454069	0.00123777	0.027902	0.0120234	0.0190818	0.0190818	TRUE	0.283596	No
orf19.2765	85072	53677	75284	94318	92176	76457	85080	71014	76318	68337	77023	77776	78832	72953	75920	100159	78414.6	74864	81966	1.095	0.131	1.481	0.138702	0.201676	0.0130804	0.00199804	0.00747172	0.00747172	TRUE	0.273432	No
orf19.2766	4	11	18	10	9	12	12	4	4	14	18	8	8	11	11	6	9.97	11	9	0.83	-0.269	-0.523	0.601106	NA	0.158252	0.147602	0.152172	0.152172	TRUE	0.190246	No
orf19.2767	23644	14938	20624	25757	27267	22772	24868	18897	21211	19018	21100	21240	23320	21728	22191	26653	22057.5	20642	23473	1.137	0.185	2.792	0.00524157	0.0112751	0.00580332	0.00204534	0.00417473	0.00417473	TRUE	0.101428	No
orf19.2768	31373	25194	29277	36360	40960	40990	42868	23944	28145	32075	29953	29983	35030	39111	38253	33771	33290.1	30039	36541	1.217	0.283	4.922	8.55105e-07	3.6436e-06	0.00382257	0.00202313	0.00314302	0.00314302	TRUE	0.0317835	No
orf19.2769	13517	9306	11097	14124	16305	13916	14030	8185	12126	11848	11353	11647	13945	13278	12519	11544	12282.5	11744	12822	1.092	0.127	2.243	0.024878	0.0454308	0.00351323	0.00209772	0.00300637	0.00300637	TRUE	0.0544411	No
orf19.277	964	742	926	1113	955	846	867	624	865	945	947	918	817	807	774	880	869.04	919	820	0.89	-0.168	-2.812	0.00492076	0.0106345	0.000980697	0.00364998	0.00225055	0.00225055	TRUE	0.0257512	No
orf19.2770	4037	2558	3194	4288	5078	4615	4754	3049	3622	3257	3268	3536	4343	4403	4242	4300	3871.35	3421	4322	1.262	0.336	7.489	6.91764e-14	7.12025e-13	0.00125595	0.00235451	0.00167263	0.00167263	TRUE	0.018913	No
orf19.2770.1	5487	3695	4624	5833	7699	6124	6291	4266	4922	4704	4731	4810	6584	5843	5614	6017	5403.19	4792	6014	1.255	0.328	6.367	1.93183e-10	1.34489e-09	0.00233079	0.0022482	0.00235677	0.00235677	TRUE	0.0505377	No
orf19.2771	1370	1017	1292	1554	1508	1440	1549	919	1229	1295	1322	1281	1290	1374	1382	1296	1308.64	1282	1336	1.044	0.061	1.247	0.212472	0.289726	0.000445773	0.00308884	0.00156604	0.00156604	TRUE	0.00948438	No
orf19.2772	5193	3751	4744	5732	6301	5902	6326	3990	4659	4775	4854	4727	5389	5632	5645	5628	5163.39	4754	5574	1.172	0.229	6.999	2.58148e-12	2.25102e-11	0.000240607	0.00226068	0.000835779	0.000835779	TRUE	0.00625269	No
orf19.2774	5307	3340	4488	5422	6012	5104	5308	3173	4761	4252	4592	4471	5142	4870	4737	4475	4662.41	4519	4806	1.064	0.089	1.696	0.0898252	0.139811	0.00250134	0.00229089	0.00244411	0.00244411	TRUE	0.0270043	No
orf19.2775	4816	3524	4082	5333	4236	3852	4125	2520	4320	4486	4176	4398	3623	3675	3681	3554	3989.27	4345	3633	0.837	-0.257	-7.153	8.47385e-13	7.83245e-12	0.000252045	0.00234342	0.000984926	0.000984926	TRUE	0.00816877	No
orf19.2778	798	871	830	1111	822	1053	924	618	716	1109	849	916	703	1005	825	872	874.25	898	851	0.949	-0.076	-0.59	0.554978	0.635409	0.0260452	0.00364004	0.0146058	0.0146058	TRUE	0.292546	No
orf19.2779	1	4	1	4	2	1	2	1	1	5	1	3	2	1	2	1	2.02	2	2	0.59	-0.762	-0.764	0.444714	NA	1e-08	0.720164	0.418796	0.418796	TRUE	0.287124	No
orf19.278	2028	1412	1877	2296	1349	1157	1295	908	1819	1798	1920	1893	1154	1104	1156	1281	1515.57	1858	1174	0.63	-0.668	-12.43	1.79536e-35	9.29871e-34	0.00134396	0.00293738	0.00207002	0.00207002	TRUE	0.0404279	No
orf19.2781	1551	1529	1614	1956	1796	1995	2022	1200	1391	1947	1651	1613	1536	1904	1804	1692	1692.32	1650	1734	1.052	0.073	0.764	0.444968	0.531462	0.0130283	0.00283734	0.00817145	0.00817145	TRUE	0.172669	No
orf19.2782	2103	1581	1795	2217	2141	2019	2099	1433	1887	2013	1836	1828	1831	1926	1873	2021	1901.96	1891	1913	1.011	0.016	0.322	0.747694	0.802026	0.00116056	0.00274279	0.00185571	0.00185571	TRUE	0.0214051	No
orf19.2783	6	5	5	6	1	3	6	1	5	6	5	5	1	3	5	1	4.04	5	2	0.497	-1.009	-1.415	0.157003	NA	1e-08	0.361607	0.211197	0.211197	TRUE	0.661713	No
orf19.2784	24	23	20	29	22	31	26	33	22	29	20	24	19	30	23	47	26.67	24	30	1.215	0.281	0.901	0.367724	0.456464	0.0528232	0.0564201	0.0549476	0.0549476	TRUE	0.679757	No
orf19.2785	2164	1771	1882	2332	2304	2291	2085	1316	1941	2255	1925	1923	1970	2186	1861	1856	1989.69	2011	1968	0.98	-0.029	-0.405	0.68533	0.748629	0.00506677	0.00270913	0.00429273	0.00429273	TRUE	0.0781782	No
orf19.2786	508	436	482	617	625	683	759	416	456	555	493	509	535	652	677	587	557.87	503	613	1.221	0.288	3.181	0.00146956	0.00357166	0.00736941	0.00458175	0.00603733	0.00603733	TRUE	0.0932044	No
orf19.2787	9	8	7	10	9	11	11	7	8	10	7	8	8	10	10	10	8.94	8	10	1.129	0.175	0.394	0.693432	NA	1e-08	0.164298	0.0766285	0.0766285	TRUE	0.0664301	No
orf19.2788	574	404	491	581	601	557	627	398	515	514	502	479	514	531	559	561	522.13	502	541	1.077	0.107	1.603	0.108992	0.164059	1e-08	0.00475988	0.0023357	0.0023357	TRUE	0.0144831	No
orf19.2789	1647	1191	1383	1758	1925	1914	1891	1257	1478	1516	1415	1450	1646	1826	1687	1773	1598.91	1465	1733	1.183	0.242	4.873	1.10125e-06	4.6139e-06	0.000975713	0.00288745	0.00174381	0.00174381	TRUE	0.0168754	No
orf19.279	66	39	57	51	45	26	28	19	59	50	58	42	38	25	25	27	40.54	52	29	0.555	-0.85	-3.564	0.000364793	0.00101467	0.0136427	0.0377899	0.0277891	0.0277891	TRUE	0.397392	No
orf19.2790	1536	1021	1344	1698	1718	1429	1545	965	1378	1300	1375	1400	1469	1364	1379	1361	1378.19	1363	1393	1.022	0.031	0.634	0.526282	0.609551	0.000477625	0.00303286	0.00155499	0.00155499	TRUE	0.0170455	No
orf19.2791	3966	2532	3565	4228	5422	4782	5346	3286	3558	3224	3647	3486	4637	4563	4770	4635	4065.02	3479	4651	1.336	0.418	9.501	2.07639e-21	4.11714e-20	0.00121415	0.00233664	0.00160634	0.00160634	TRUE	0.0282886	No
orf19.2792	636	410	540	675	978	818	955	599	571	522	552	557	836	781	852	845	689.44	550	828	1.501	0.586	9.632	5.83096e-22	1.20801e-20	1e-08	0.00408513	0.00204928	0.00204928	TRUE	0.0184784	No
orf19.2794	1032	869	909	1149	1123	1018	1037	624	926	1106	930	947	960	971	925	880	955.85	977	934	0.96	-0.059	-0.865	0.386765	0.475872	0.0034855	0.00349827	0.00342824	0.00342824	TRUE	0.0883497	No
orf19.2795	5158	4239	4626	6105	4382	4566	4507	2704	4627	5397	4733	5034	3748	4357	4022	3814	4466.37	4948	3985	0.806	-0.311	-4.938	7.87434e-07	3.37681e-06	0.00449848	0.00230455	0.00358988	0.00358988	TRUE	0.0481824	No
orf19.2796	500	356	441	561	522	422	482	310	449	453	451	463	446	403	430	437	441.5	454	429	0.945	-0.082	-1.18	0.237952	0.318827	1e-08	0.00526764	0.00237724	0.00237724	TRUE	0.0206629	No
orf19.2797	108	46	58	82	89	82	73	54	97	59	59	68	76	78	65	76	72.26	71	74	1.037	0.053	0.276	0.782627	0.829428	0.0202338	0.0220699	0.021246	0.021246	TRUE	0.590667	No
orf19.2798	95	71	99	137	187	155	168	116	85	90	101	113	160	148	150	164	126.4	97	156	1.583	0.663	5.057	4.24953e-07	1.90247e-06	1e-08	0.0134643	0.00818574	0.00818574	TRUE	0.127915	No
orf19.2799	1473	1075	1251	1483	1657	1367	1576	971	1321	1369	1280	1223	1417	1304	1406	1370	1336.26	1298	1374	1.061	0.085	1.606	0.108344	0.163223	0.00112909	0.00306591	0.00194491	0.00194491	TRUE	0.0190117	No
orf19.28	7554	5111	6640	7978	8061	7261	7685	4231	6777	6507	6793	6579	6894	6928	6858	5967	6662.87	6664	6662	1	0.001	0.01	0.991853	0.993672	0.00212185	0.0021974	0.00240969	0.00240969	TRUE	0.0586209	No
orf19.280	32	27	37	33	35	30	43	25	29	34	38	27	30	29	38	35	32.54	32	33	1.037	0.052	0.213	0.831085	0.870191	1e-08	0.0465895	0.0263919	0.0263919	TRUE	0.109599	No
orf19.2800	0	0	0	1	0	0	0	0	0	0	0	1	0	0	0	0	0.1	0	0	0.616	-0.698	-0.198	0.843345	NA	1e-08	14.0857	10	10	TRUE	0.242861	No
orf19.2803	2247	1465	1938	2456	2875	2482	2689	1703	2016	1865	1983	2025	2459	2368	2399	2402	2189.67	1972	2407	1.219	0.286	6.883	5.87796e-12	4.89803e-11	0.000206005	0.0026425	0.0011904	0.0011904	TRUE	0.0149448	No
orf19.2804	1	3	2	3	5	1	6	1	1	4	2	2	4	1	5	1	2.65	2	3	1.385	0.47	0.534	0.593032	NA	1e-08	0.548986	0.35949	0.35949	TRUE	0.19555	No
orf19.2805	253	193	249	298	288	291	321	194	227	246	255	246	246	278	286	274	257.15	244	271	1.114	0.156	1.69	0.0910559	0.141397	1e-08	0.00762489	0.00424217	0.00424217	TRUE	0.0473315	No
orf19.2808	699	546	716	830	754	832	853	493	627	695	733	684	645	794	761	695	704.3	685	724	1.058	0.082	1.03	0.302938	0.3889	0.00515939	0.00404073	0.00464141	0.00464141	TRUE	0.0689771	No
orf19.2809	1693	1186	1509	1804	1565	1381	1406	988	1519	1510	1544	1488	1338	1318	1255	1393	1420.55	1515	1326	0.874	-0.195	-4.128	3.65188e-05	0.000121074	0.000196748	0.00300145	0.00142845	0.00142845	TRUE	0.0158416	No
orf19.281	192	132	163	196	205	183	176	134	172	168	167	162	175	175	157	189	170.58	167	174	1.036	0.051	0.476	0.634166	0.705177	1e-08	0.0104898	0.00524249	0.00524249	TRUE	0.0469262	No
orf19.2810	641	462	551	735	387	320	361	241	575	588	564	606	331	305	322	340	453.92	583	324	0.555	-0.849	-11.95	6.53143e-33	2.82308e-31	1e-08	0.00517764	0.00245569	0.00245569	TRUE	0.0177244	No
orf19.2812	435	281	398	462	357	297	351	205	390	358	407	381	305	283	313	289	340.9	384	298	0.776	-0.366	-4.55	5.35384e-06	2.03324e-05	1e-08	0.00623796	0.00325419	0.00325419	TRUE	0.0208126	No
orf19.2813	3	1	2	1	3	2	0	0	3	1	2	1	3	2	0	0	1.41	2	1	0.695	-0.526	-0.439	0.66079	NA	1e-08	1.02889	0.668019	0.668019	TRUE	0.400905	No
orf19.2818	1326	916	1220	1442	1591	1498	1656	1037	1190	1166	1248	1189	1361	1429	1478	1463	1315.41	1198	1433	1.194	0.256	5.224	1.75374e-07	8.31316e-07	0.000417257	0.00308313	0.00153707	0.00153707	TRUE	0.0144968	No
orf19.2819	148	133	135	165	138	181	180	107	133	169	138	136	118	173	161	151	147.32	144	151	1.049	0.069	0.488	0.625829	0.69775	0.0132331	0.0118338	0.0124788	0.0124788	TRUE	0.246669	No
orf19.2820	4438	3137	3934	4679	4432	3959	4294	2769	3981	3994	4025	3858	3790	3778	3832	3905	3895.42	3964	3826	0.965	-0.052	-1.571	0.116279	0.173394	1e-08	0.00235219	0.000774885	0.000774885	TRUE	0.00414195	No
orf19.2821	2093	1661	1840	2471	2194	2140	2187	1407	1878	2115	1883	2038	1876	2042	1952	1984	1970.83	1978	1964	0.993	-0.01	-0.191	0.848328	0.884156	0.00184766	0.00271612	0.00219604	0.00219604	TRUE	0.0245742	No
orf19.2822	305	269	258	319	255	258	239	154	274	342	264	263	218	246	213	217	254.73	286	224	0.788	-0.345	-3.2	0.0013736	0.00335611	0.0065108	0.00767855	0.00713175	0.00713175	TRUE	0.182039	No
orf19.2823	3202	2368	3081	3746	3512	3236	3505	2598	2873	3015	3152	3089	3004	3088	3128	3664	3126.44	3032	3221	1.061	0.085	1.325	0.185217	0.257648	0.00470197	0.00244385	0.00364564	0.00364564	TRUE	0.101426	No
orf19.2825	6610	5393	5671	7616	7112	6561	6923	4081	5930	6866	5802	6280	6082	6260	6178	5756	6144.27	6220	6069	0.977	-0.034	-0.608	0.543453	0.625371	0.00313266	0.00221579	0.00289522	0.00289522	TRUE	0.0587983	No
orf19.2826	1565	1022	1338	1664	2118	1840	2048	1246	1404	1301	1369	1372	1811	1756	1827	1757	1574.76	1362	1788	1.312	0.392	8.893	5.96725e-19	9.95867e-18	1e-08	0.00290138	0.00122044	0.00122044	TRUE	0.00967271	No
orf19.2827	256	233	268	328	296	348	374	194	230	297	274	270	253	332	334	274	282.94	268	298	1.119	0.162	1.388	0.165286	0.234626	0.0119743	0.00711032	0.0095035	0.0095035	TRUE	0.129302	No
orf19.2828	336	318	332	474	451	427	460	241	301	405	340	391	386	407	410	340	372.54	359	386	1.08	0.111	1.07	0.284595	0.368819	0.0096151	0.00587627	0.00769563	0.00769563	TRUE	0.138402	No
orf19.2829	1817	1528	1508	2034	1627	1535	1548	907	1630	1945	1543	1677	1391	1465	1381	1279	1539.02	1699	1379	0.814	-0.297	-4.058	4.95141e-05	0.000160367	0.00586666	0.00292279	0.00449453	0.00449453	TRUE	0.111167	No
orf19.2830	11983	9152	10555	13253	10887	10294	10555	6740	10750	11651	10799	10929	9311	9822	9419	9506	10273.3	11032	9514	0.863	-0.213	-5.697	1.22224e-08	6.70003e-08	0.000860708	0.00212083	0.00124582	0.00124582	TRUE	0.0171398	No
orf19.2831	3203	2237	2673	3404	2771	2448	2656	1440	2873	2848	2735	2807	2370	2336	2370	2031	2546.22	2816	2277	0.81	-0.304	-5.64	1.7029e-08	9.15935e-08	0.00231442	0.00254966	0.00238269	0.00238269	TRUE	0.0598673	No
orf19.2832	4807	3462	4308	5197	4022	3903	4244	2561	4312	4407	4408	4286	3440	3724	3787	3612	3996.99	4353	3641	0.837	-0.257	-6.413	1.42535e-10	1.00866e-09	0.000645523	0.00234272	0.00129339	0.00129339	TRUE	0.017687	No
orf19.2833	78	56	84	104	88	84	100	75	70	71	86	86	75	80	89	106	82.92	78	88	1.104	0.143	0.873	0.382777	0.471932	0.00464288	0.0194859	0.0135055	0.0135055	TRUE	0.146925	No
orf19.2834	2700	1848	2305	3010	3465	3230	3535	2148	2422	2353	2358	2482	2963	3082	3154	3030	2730.56	2404	3057	1.271	0.346	8.787	1.53335e-18	2.48983e-17	0.000369276	0.00251117	0.00111575	0.00111575	TRUE	0.00599457	No
orf19.2835	605	518	567	748	591	618	639	359	543	659	580	617	505	590	570	506	571.35	600	543	0.908	-0.138	-1.692	0.0907302	0.140974	0.00481827	0.00452036	0.00467305	0.00467305	TRUE	0.0487852	No
orf19.2836	237	148	197	234	262	178	205	143	213	188	202	193	224	170	183	202	196.76	199	195	0.977	-0.034	-0.299	0.764657	0.816286	0.00436874	0.00935758	0.00706001	0.00706001	TRUE	0.128683	No
orf19.2837	201	169	166	226	204	174	176	112	180	215	170	186	174	166	157	158	175.9	188	164	0.878	-0.188	-1.692	0.0906582	0.140925	1e-08	0.0102326	0.00610875	0.00610875	TRUE	0.0876089	No
orf19.2838	1457	1128	1376	1682	2453	2390	2564	1499	1307	1436	1408	1387	2098	2280	2288	2114	1789.8	1384	2195	1.588	0.667	12.969	1.83885e-38	1.16293e-36	0.00139563	0.00279062	0.00195254	0.00195254	TRUE	0.0172644	No
orf19.2839	2969	1911	2446	2953	4738	4177	4483	2617	2664	2433	2502	2435	4052	3986	4000	3691	3220.38	2508	3932	1.568	0.649	13.785	3.11945e-43	2.28557e-41	0.00135863	0.00243031	0.00180295	0.00180295	TRUE	0.021388	No
orf19.284	120	69	91	109	117	84	82	72	108	88	93	90	100	80	73	102	91.68	95	89	0.929	-0.106	-0.667	0.504832	0.589281	0.00666968	0.0178145	0.0131192	0.0131192	TRUE	0.140755	No
orf19.2841	7844	6130	7162	8800	8829	9009	9147	5089	7037	7804	7327	7257	7551	8596	8162	7178	7613.97	7356	7872	1.071	0.099	1.653	0.0982849	0.150598	0.0040011	0.00217019	0.00328054	0.00328054	TRUE	0.0467266	No
orf19.2842	7931	5659	7249	9187	9774	8734	9780	6401	7115	7205	7416	7576	8359	8334	8727	9028	7969.93	7328	8612	1.174	0.232	5.883	4.01983e-09	2.36776e-08	0.000971121	0.00216167	0.00136682	0.00136682	TRUE	0.0125435	No
orf19.2843	5209	3397	4444	5713	4508	3923	3958	2346	4673	4325	4547	4711	3855	3743	3532	3309	4086.84	4564	3610	0.791	-0.337	-6.276	3.48065e-10	2.36558e-09	0.00263309	0.00233474	0.00252717	0.00252717	TRUE	0.036791	No
orf19.2844	599	513	555	698	724	754	789	436	537	653	568	576	619	719	704	615	623.94	584	664	1.144	0.194	2.391	0.0168016	0.0318838	0.00485184	0.0043062	0.0046923	0.0046923	TRUE	0.0702062	No
orf19.2846	278	198	235	315	342	291	361	215	249	252	240	260	292	278	322	303	274.65	250	299	1.192	0.254	2.88	0.00397402	0.00877468	1e-08	0.00726523	0.00379192	0.00379192	TRUE	0.0346671	No
orf19.2847	3672	3254	3559	4459	3999	4431	4452	2800	3294	4143	3641	3677	3420	4228	3973	3949	3790.6	3689	3892	1.056	0.078	1.002	0.316125	0.402902	0.0076109	0.0023625	0.00555226	0.00555226	TRUE	0.0824732	No
orf19.2848	2602	1752	2319	2935	2954	2498	2742	1786	2334	2230	2373	2420	2526	2384	2447	2519	2404.15	2339	2469	1.054	0.076	1.79	0.0734252	0.117431	0.000513701	0.00258335	0.00129402	0.00129402	TRUE	0.0111411	No
orf19.2849	26967	16930	23963	29337	24746	19196	20827	12641	24192	21554	24517	24192	21164	18316	18585	17829	21293.4	23614	18974	0.804	-0.316	-5.092	3.53786e-07	1.60297e-06	0.00474564	0.0020477	0.00364182	0.00364182	TRUE	0.0740584	No
orf19.285	5135	3588	4251	5316	6130	5272	5735	3081	4607	4568	4349	4384	5243	5030	5118	4345	4705.42	4477	4934	1.103	0.142	2.421	0.0154861	0.0296874	0.0034501	0.00228804	0.00308041	0.00308041	TRUE	0.0765553	No
orf19.2850	6239	4274	5406	6435	6961	6192	6785	4059	5597	5441	5531	5306	5953	5908	6054	5725	5689.55	5469	5910	1.081	0.113	3.333	0.000859743	0.00219242	0.000301738	0.00223468	0.000926065	0.000926065	TRUE	0.00512475	No
orf19.2851	918	668	816	978	857	884	908	602	824	850	835	806	733	843	810	849	818.88	829	809	0.975	-0.037	-0.6	0.548317	0.629522	0.00136545	0.00375232	0.00246627	0.00246627	TRUE	0.0498051	No
orf19.2852	3434	2507	2928	3774	3546	3193	3264	2106	3081	3192	2996	3112	3033	3047	2913	2970	3042.78	3095	2991	0.967	-0.049	-1.31	0.190232	0.263284	0.000207324	0.00245662	0.000997174	0.000997174	TRUE	0.00548364	No
orf19.2853	1264	936	1144	1371	1457	1446	1509	1029	1134	1192	1170	1131	1246	1380	1347	1451	1256.27	1157	1356	1.171	0.227	4.045	5.22185e-05	0.000168521	0.00154897	0.00313509	0.00222653	0.00222653	TRUE	0.0363775	No
orf19.2857	9121	6273	8050	9590	8865	7774	8404	5119	8182	7986	8236	7908	7582	7418	7499	7220	7753.88	8078	7430	0.92	-0.12	-3.864	0.000111613	0.000338673	0.000232256	0.00216675	0.000795747	0.000795747	TRUE	0.00417843	No
orf19.2859	7956	4983	6430	8206	7255	6151	6816	4134	7137	6344	6579	6767	6205	5869	6082	5831	6351.64	6707	5997	0.894	-0.162	-3.622	0.000292186	0.000826875	0.00147633	0.00220808	0.00175185	0.00175185	TRUE	0.0228096	No
orf19.286	99	55	64	107	80	67	74	55	89	70	65	88	68	64	66	78	73.56	78	69	0.87	-0.201	-1.183	0.236774	0.317673	1e-08	0.0217138	0.0140585	0.0140585	TRUE	0.116427	No
orf19.2862	3946	2514	3408	4125	4231	3440	3887	2436	3540	3201	3487	3402	3618	3282	3469	3436	3429.24	3408	3451	1.013	0.018	0.384	0.701267	0.762987	0.00125364	0.00240285	0.00180526	0.00180526	TRUE	0.0194257	No
orf19.2863	291	203	262	369	447	365	409	250	261	258	268	304	382	348	365	353	317.49	273	362	1.324	0.405	4.69	2.72666e-06	1.08345e-05	1e-08	0.00655188	0.00395274	0.00395274	TRUE	0.0730444	No
orf19.2863.1	512	307	400	463	593	458	545	315	459	391	409	382	507	437	486	444	439.49	410	468	1.144	0.194	2.286	0.0222341	0.041077	0.00401997	0.00528264	0.00464314	0.00464314	TRUE	0.0781615	No
orf19.2864.1	19323	12278	14882	18743	20529	16209	17035	10274	17335	15631	15226	15456	17557	15466	15201	14491	15795.2	15912	15679	0.985	-0.021	-0.329	0.742125	0.798189	0.00457616	0.00207143	0.00388663	0.00388663	TRUE	0.0797347	No
orf19.2866	78	43	74	96	109	74	80	59	70	55	76	79	93	71	71	83	74.75	70	80	1.128	0.174	1	0.317451	0.404335	0.00745244	0.0213996	0.0156605	0.0156605	TRUE	0.156375	No
orf19.2867	3679	2618	3307	3988	4169	3762	4061	2608	3300	3333	3383	3289	3565	3590	3624	3678	3470.32	3326	3614	1.086	0.119	3.69	0.000224624	0.000648505	1e-08	0.00239784	0.000714578	0.000714578	TRUE	0.00165406	No
orf19.2868	7	7	3	3	3	4	4	2	6	9	3	2	3	4	4	3	4.19	5	4	0.637	-0.65	-0.934	0.350556	NA	1e-08	0.348581	0.210965	0.210965	TRUE	0.263201	No
orf19.2869	2	1	2	1	5	2	5	0	2	1	2	1	4	2	4	0	2.07	2	2	1.906	0.93	0.935	0.349841	NA	1e-08	0.702257	0.437788	0.437788	TRUE	0.234259	No
orf19.287	4593	2837	3569	4483	4030	3267	3560	2283	4120	3612	3651	3697	3447	3117	3177	3220	3505.11	3770	3240	0.859	-0.219	-4.032	5.53934e-05	0.00017778	0.00256494	0.00239369	0.002541	0.002541	TRUE	0.047993	No
orf19.2870	2473	1747	1948	2501	2828	2341	2453	1299	2219	2224	1993	2062	2419	2234	2189	1832	2146.42	2124	2168	1.023	0.032	0.414	0.678942	0.743273	0.00752063	0.00265586	0.00531909	0.00531909	TRUE	0.127225	No
orf19.2871	6664	4353	5964	7014	7784	6696	7059	4763	5978	5542	6102	5784	6657	6389	6299	6718	6183.59	5852	6516	1.113	0.154	3.688	0.000226364	0.000652901	0.00114207	0.00221429	0.00151618	0.00151618	TRUE	0.0149679	No
orf19.2873	2944	2067	2598	3142	2513	2349	2581	1551	2641	2632	2658	2591	2149	2241	2303	2188	2425.34	2630	2220	0.845	-0.244	-6.295	3.08158e-10	2.10867e-09	1e-08	0.00257808	0.00102242	0.00102242	TRUE	0.00797632	No
orf19.2875	1983	1528	1593	2054	1788	1654	1710	961	1779	1945	1630	1694	1529	1578	1526	1355	1629.56	1762	1497	0.852	-0.231	-3.455	0.00055055	0.0014714	0.00430395	0.00287038	0.00366947	0.00366947	TRUE	0.0569554	No
orf19.2876	2735	1747	2158	2868	3371	2850	3096	1994	2454	2224	2208	2365	2883	2719	2763	2812	2553.49	2313	2794	1.207	0.271	5.808	6.30494e-09	3.60077e-08	0.00108	0.00254804	0.00169959	0.00169959	TRUE	0.0203708	No
orf19.2877	21945	14839	19427	23789	28896	24558	26727	18340	19687	18892	19876	19617	24713	23432	23849	25867	21991.6	19518	24465	1.253	0.326	8.332	7.92406e-17	1.10459e-15	0.00114973	0.00204553	0.00142025	0.00142025	TRUE	0.018008	No
orf19.2878	85	53	90	90	81	72	95	48	76	67	92	74	69	69	85	68	75.06	77	73	0.939	-0.091	-0.547	0.584091	0.662367	1e-08	0.0213205	0.0133843	0.0133843	TRUE	0.14021	No
orf19.2879	244	156	210	260	230	193	211	154	219	199	215	214	197	184	188	217	204.14	212	196	0.921	-0.119	-1.193	0.232787	0.31334	1e-08	0.00909095	0.00461081	0.00461081	TRUE	0.0428283	No
orf19.288	2291	1607	2050	2576	2035	1854	2040	1341	2055	2046	2097	2124	1740	1769	1820	1891	1942.98	2080	1805	0.866	-0.208	-4.896	9.77512e-07	4.13002e-06	0.000138477	0.00272667	0.00121516	0.00121516	TRUE	0.01108	No
orf19.2881	7067	6011	7111	8357	8320	8986	8936	5199	6340	7653	7275	6891	7116	8574	7974	7333	7394.42	7040	7749	1.101	0.139	1.951	0.0510499	0.0856677	0.00661566	0.00217585	0.00474473	0.00474473	TRUE	0.0628355	No
orf19.2882	2653	1801	2300	2926	2708	2496	2670	1610	2380	2293	2353	2413	2316	2382	2383	2271	2348.71	2360	2338	0.991	-0.014	-0.351	0.725822	0.785294	1e-08	0.00259761	0.00100003	0.00100003	TRUE	0.00411008	No
orf19.2883	1336	979	1175	1497	1281	1229	1243	886	1199	1246	1202	1234	1096	1173	1109	1250	1188.56	1220	1157	0.945	-0.081	-1.503	0.132817	0.194815	0.000920189	0.00320091	0.00196392	0.00196392	TRUE	0.0314068	No
orf19.2884	3681	3002	3516	4262	4127	4181	4262	2427	3302	3822	3597	3514	3530	3989	3803	3423	3622.62	3559	3686	1.037	0.052	0.857	0.391491	0.480408	0.00374998	0.00238026	0.00330729	0.00330729	TRUE	0.0371004	No
orf19.2885	30	37	52	40	54	63	52	33	27	47	53	33	46	60	46	47	44.93	40	50	1.261	0.335	1.385	0.1661	0.235528	0.0325038	0.0342895	0.0335671	0.0335671	TRUE	0.244859	No
orf19.2886	941	836	955	1177	964	1134	1136	773	844	1064	977	971	824	1082	1014	1090	983.32	964	1002	1.04	0.056	0.585	0.558714	0.639138	0.0117014	0.00345585	0.00777981	0.00777981	TRUE	0.174763	No
orf19.2887	5201	3645	4329	5470	4514	3934	4215	2808	4666	4640	4429	4511	3861	3754	3761	3960	4197.72	4562	3834	0.84	-0.252	-7.009	2.40523e-12	2.10651e-11	0.000300941	0.00232535	0.000995215	0.000995215	TRUE	0.00552616	No
orf19.2888	214	171	193	275	170	223	197	98	192	218	197	227	145	213	176	138	188.26	208	168	0.81	-0.304	-2.211	0.027039	0.0490046	0.0163977	0.00969064	0.0127476	0.0127476	TRUE	0.339743	No
orf19.2889	818	607	700	875	861	785	831	502	734	773	716	722	736	749	742	708	734.91	736	734	1	0	0.005	0.995845	0.997173	1e-08	0.00395488	0.00169542	0.00169542	TRUE	0.0117439	No
orf19.2890	927	753	872	1171	1012	986	919	623	832	959	892	966	865	941	820	879	894.13	912	876	0.961	-0.057	-0.843	0.399085	0.487834	0.00307065	0.00360311	0.00330909	0.00330909	TRUE	0.0433316	No
orf19.2891	787	520	677	931	1006	1074	1112	722	706	662	693	768	860	1025	992	1018	840.51	707	974	1.372	0.457	6.193	5.90789e-10	3.89195e-09	0.00423558	0.00370668	0.00399736	0.00399736	TRUE	0.0764162	No
orf19.2892	3342	2746	3150	3836	3694	4010	4122	2655	2998	3496	3223	3163	3159	3826	3678	3745	3411.04	3220	3602	1.119	0.162	2.375	0.0175574	0.0330985	0.00517523	0.00240511	0.00417038	0.00417038	TRUE	0.08443	No
orf19.2893	876	893	918	1138	903	1121	1176	642	786	1137	939	938	772	1070	1049	905	949.64	950	949	1.001	0.001	0.008	0.993886	0.995543	0.0214591	0.00350821	0.0124513	0.0124513	TRUE	0.204167	No
orf19.2895	665	453	534	689	696	590	645	387	597	577	546	568	595	563	576	546	570.92	572	570	0.999	-0.002	-0.031	0.975195	0.982224	1e-08	0.00452226	0.00214735	0.00214735	TRUE	0.0105942	No
orf19.2896	1369	927	1094	1533	1669	1318	1522	956	1228	1180	1119	1264	1427	1258	1358	1348	1272.9	1198	1348	1.124	0.169	2.885	0.00391583	0.00865892	0.00205727	0.00311999	0.00250617	0.00250617	TRUE	0.0253437	No
orf19.2897	77	56	60	67	112	80	105	69	69	71	61	55	96	76	94	97	77.52	64	91	1.418	0.504	3.069	0.00214965	0.00504496	1e-08	0.020707	0.0126204	0.0126204	TRUE	0.113307	No
orf19.2898	1573	1072	1405	1719	1419	1360	1449	910	1411	1365	1437	1418	1214	1298	1293	1283	1339.82	1408	1272	0.902	-0.148	-3.197	0.00138871	0.00338885	1e-08	0.00306302	0.00132093	0.00132093	TRUE	0.0123562	No
orf19.2899	119	87	101	102	112	90	121	75	107	111	103	84	96	86	108	106	100.05	101	99	0.979	-0.03	-0.204	0.83854	0.876497	1e-08	0.0164898	0.0110779	0.0110779	TRUE	0.143282	No
orf19.29	4112	3512	3793	4861	5432	5613	5711	3754	3689	4471	3881	4008	4646	5356	5096	5295	4555.16	4012	5098	1.271	0.346	5.243	1.58344e-07	7.55025e-07	0.00513184	0.00229822	0.00395735	0.00395735	TRUE	0.0710008	No
orf19.290	907	626	847	925	1005	913	1046	578	814	797	867	763	860	871	933	815	839.9	810	870	1.077	0.107	1.686	0.0918402	0.14244	0.00177276	0.00370794	0.00266705	0.00266705	TRUE	0.0288302	No
orf19.2901	2403	1956	2206	2776	2995	2899	3018	2073	2156	2490	2257	2289	2561	2766	2693	2924	2517.05	2298	2736	1.19	0.252	4.403	1.06978e-05	3.87415e-05	0.00285128	0.00255627	0.00273246	0.00273246	TRUE	0.0370007	No
orf19.2903	192	199	186	256	195	270	237	138	172	253	190	211	167	258	211	195	207.19	206	208	1.009	0.012	0.082	0.934669	0.953071	0.0254823	0.0089862	0.0169414	0.0169414	TRUE	0.294599	No
orf19.2905	13	21	17	17	16	18	15	4	12	27	17	14	14	17	13	6	14.96	18	12	0.75	-0.415	-1.041	0.297693	NA	0.0609377	0.099007	0.0844995	0.0844995	TRUE	0.518271	No
orf19.2906	159	92	135	197	161	123	158	111	143	117	138	162	138	117	141	157	139.12	140	138	0.974	-0.038	-0.284	0.776379	0.824848	0.00766613	0.0124147	0.0103757	0.0103757	TRUE	0.125025	No
orf19.2907	6	5	12	12	4	6	6	7	5	6	12	10	3	6	5	10	7.29	8	6	0.685	-0.545	-1.018	0.308741	NA	1e-08	0.201206	0.131547	0.131547	TRUE	0.262238	No
orf19.2907.1	233	210	182	291	353	258	294	150	209	267	186	240	302	246	262	212	240.57	226	256	1.141	0.191	1.437	0.150807	0.216603	0.0175653	0.00801406	0.0127535	0.0127535	TRUE	0.167963	No
orf19.2908	320	225	256	324	353	318	333	244	287	286	262	267	302	303	297	344	293.65	276	312	1.126	0.171	1.974	0.0484033	0.0818482	1e-08	0.00692313	0.00377731	0.00377731	TRUE	0.0462882	No
orf19.2909	861	616	792	963	942	877	919	582	772	784	810	794	806	837	820	821	805.55	790	821	1.038	0.054	1.03	0.303227	0.389105	1e-08	0.00378165	0.00144812	0.00144812	TRUE	0.00338337	No
orf19.291	1667	1047	1387	1724	1536	1329	1452	908	1495	1333	1419	1422	1314	1268	1296	1281	1353.39	1417	1290	0.909	-0.138	-2.816	0.00486837	0.0105289	0.00045111	0.00305216	0.00156733	0.00156733	TRUE	0.0177016	No
orf19.2910	100	69	99	99	130	98	107	81	90	88	101	82	111	94	95	114	96.86	90	104	1.147	0.197	1.357	0.174714	0.245827	1e-08	0.016967	0.00995409	0.00995409	TRUE	0.0669274	No
orf19.2911	1419	942	1316	1533	2162	1930	2137	1251	1273	1199	1346	1264	1849	1842	1907	1764	1555.59	1270	1840	1.449	0.535	10.84	2.23465e-27	7.0662e-26	0.000741728	0.00291274	0.00167243	0.00167243	TRUE	0.0184055	No
orf19.2914	458	313	414	517	688	542	637	376	411	398	424	426	588	517	568	530	482.94	415	551	1.33	0.411	5.747	9.08525e-09	5.04941e-08	1e-08	0.00498548	0.00280745	0.00280745	TRUE	0.0252606	No
orf19.2915	2755	1954	2474	2986	3275	3220	3381	2047	2472	2488	2531	2462	2801	3072	3017	2887	2716.25	2488	2944	1.184	0.243	5.792	6.94943e-09	3.93517e-08	0.00068385	0.00251397	0.00132448	0.00132448	TRUE	0.0139932	No
orf19.2916	66	37	63	67	63	79	85	32	59	47	64	55	54	75	76	45	59.53	56	62	1.115	0.157	0.763	0.445335	0.531712	0.0202731	0.0263646	0.0238586	0.0238586	TRUE	0.208957	No
orf19.2917	18417	12386	15710	19628	15512	13669	14351	8884	16522	15769	16073	16185	13266	13043	12806	12530	14524.2	16137	12911	0.8	-0.322	-10.425	1.90815e-25	5.00619e-24	0.000392517	0.00207947	0.00084339	0.00084339	TRUE	0.00467736	No
orf19.2917.1	559	353	421	579	715	550	585	455	501	449	431	477	611	525	522	642	519.89	464	575	1.231	0.3	3.444	0.000574164	0.00152704	0.0059114	0.00477186	0.00535526	0.00535526	TRUE	0.0641899	No
orf19.2919	563	391	470	614	599	558	585	355	505	498	481	506	512	532	522	501	507.18	498	517	1.04	0.056	0.872	0.38312	0.472162	1e-08	0.00484182	0.00201251	0.00201251	TRUE	0.00599872	No
orf19.292	110	64	85	103	106	77	70	60	99	81	87	85	91	73	62	85	82.91	88	78	0.878	-0.187	-1.143	0.252842	0.335262	0.0057412	0.0194891	0.0136172	0.0136172	TRUE	0.179326	No
orf19.2920	2521	1681	2048	2715	2723	2173	2371	1479	2262	2140	2095	2239	2329	2073	2116	2086	2167.47	2184	2151	0.985	-0.022	-0.416	0.677271	0.741985	0.001771	0.00264929	0.0021102	0.0021102	TRUE	0.0385852	No
orf19.2921	156	113	151	153	105	121	114	80	140	144	154	126	90	115	102	113	123.03	141	105	0.742	-0.431	-3.217	0.00129654	0.00318464	1e-08	0.0137787	0.00894309	0.00894309	TRUE	0.102428	No
orf19.2922	23	20	15	23	31	14	17	12	21	25	15	19	27	13	15	17	19.05	20	18	0.909	-0.137	-0.409	0.682836	0.746584	0.022411	0.0781977	0.0555219	0.0555219	TRUE	0.621079	No
orf19.2923	204	170	167	234	288	260	245	170	183	216	171	193	246	248	219	240	214.5	191	238	1.253	0.325	3.145	0.00166278	0.00398802	0.00102584	0.00874722	0.0055352	0.0055352	TRUE	0.0742972	No
orf19.2925	307	289	265	366	289	316	315	174	275	368	271	302	247	302	281	245	286.43	304	269	0.89	-0.169	-1.472	0.140926	0.204612	0.0112843	0.00704777	0.00908435	0.00908435	TRUE	0.206983	No
orf19.2926	1845	1431	1720	2121	2136	2073	2309	1310	1655	1822	1760	1749	1827	1978	2060	1848	1837.31	1746	1928	1.106	0.145	2.687	0.00720272	0.0149789	0.00169497	0.00276964	0.00225496	0.00225496	TRUE	0.0262151	No
orf19.2927	1024	1125	1061	1316	1507	1968	1961	1166	919	1432	1086	1085	1289	1878	1750	1645	1385.33	1130	1640	1.452	0.538	3.049	0.00229478	0.00534796	0.0291577	0.00302743	0.0155788	0.0291577	TRUE	0.382859	No
orf19.2928	715	698	667	863	778	857	909	521	641	889	682	712	665	818	811	735	744.14	731	757	1.039	0.055	0.53	0.595837	0.672816	0.0135217	0.00393036	0.0088373	0.0088373	TRUE	0.239653	No
orf19.2929	10438	8115	10407	13143	9400	9250	9451	6113	9364	10331	10647	10838	8039	8826	8433	8622	9387.63	10295	8480	0.824	-0.28	-5.315	1.06701e-07	5.21201e-07	0.00266002	0.00213416	0.00255741	0.00255741	TRUE	0.0456289	No
orf19.2930	4674	3367	4245	5126	4404	4052	4384	2995	4193	4287	4343	4227	3766	3866	3912	4224	4102.32	4262	3942	0.924	-0.114	-2.7	0.00694018	0.0145032	0.00105071	0.0023334	0.00147596	0.00147596	TRUE	0.0267475	No
orf19.2933	2185	1490	1782	2350	1767	1719	1840	1082	1960	1897	1823	1938	1511	1640	1642	1526	1742.18	1904	1580	0.83	-0.269	-5.53	3.20569e-08	1.66752e-07	0.000939114	0.00281279	0.00169371	0.00169371	TRUE	0.0115636	No
orf19.2934	6184	4998	5473	7288	6255	6512	6561	4012	5548	6363	5599	6010	5349	6214	5855	5659	5824.51	5880	5769	0.981	-0.027	-0.454	0.649868	0.719309	0.00343444	0.00222876	0.00323021	0.00323021	TRUE	0.036742	No
orf19.2935	28277	18282	23440	29562	26374	21971	23633	14688	25367	23275	23981	24377	22556	20964	21089	20716	22790.7	24250	21331	0.88	-0.185	-4.526	6.01188e-06	2.2647e-05	0.00134851	0.00204322	0.0015608	0.0015608	TRUE	0.01836	No
orf19.2936	350	330	340	442	311	324	340	177	314	420	348	364	266	309	303	250	321.83	362	282	0.786	-0.348	-3.269	0.00108043	0.00270355	0.00908581	0.00649035	0.0077354	0.0077354	TRUE	0.125168	No
orf19.2937	1395	1347	1269	1717	1402	1385	1392	783	1251	1715	1298	1416	1199	1322	1242	1104	1318.44	1420	1217	0.859	-0.22	-2.328	0.01991	0.0370568	0.0125068	0.0030806	0.0077754	0.0077754	TRUE	0.229219	No
orf19.2938	1595	1293	1440	1753	1498	1581	1616	993	1431	1646	1473	1446	1281	1509	1442	1401	1453.51	1499	1408	0.941	-0.088	-1.348	0.177606	0.249312	0.00359734	0.00297828	0.00343933	0.00343933	TRUE	0.0504488	No
orf19.2939	362	278	328	429	457	375	407	230	325	354	336	354	391	358	363	324	350.53	342	359	1.056	0.079	0.958	0.337812	0.424953	1e-08	0.00612097	0.00365601	0.00365601	TRUE	0.0404135	No
orf19.2940	388	319	323	456	523	485	556	315	348	406	330	376	447	463	496	444	413.89	365	462	1.272	0.347	4.228	2.35725e-05	8.10202e-05	0.00216738	0.00548694	0.00401935	0.00401935	TRUE	0.0566643	No
orf19.2941	5	1	3	5	3	7	5	3	4	1	3	4	3	7	4	4	3.86	3	4	1.334	0.415	0.596	0.551294	NA	1e-08	0.377961	0.207065	0.207065	TRUE	0.224117	No
orf19.2942	46227	32276	42180	50632	43201	38206	41933	25897	41470	41091	43154	41752	36947	36455	37418	36525	39351.6	41867	36836	0.88	-0.185	-6.887	5.68157e-12	4.74096e-11	0.000269878	0.00201641	0.000664685	0.000664685	TRUE	0.00523579	No
orf19.2943.5	2	2	1	4	2	2	1	3	2	3	1	3	2	2	1	4	2.18	2	2	0.941	-0.087	-0.094	0.925419	NA	1e-08	0.669262	0.360525	0.360525	TRUE	0.246511	No
orf19.2945	80	44	56	72	56	54	52	17	72	56	57	59	48	52	46	24	51.78	61	42	0.708	-0.499	-2.286	0.0222319	0.041077	0.0179517	0.030015	0.0260005	0.0260005	TRUE	0.465806	No
orf19.2946	362	208	283	382	245	257	250	166	325	265	290	315	210	245	223	234	263.26	299	228	0.758	-0.399	-4.079	4.52364e-05	0.000147627	0.00274634	0.0074939	0.00532078	0.00532078	TRUE	0.0582708	No
orf19.2947	3848	2522	3204	4007	4150	3605	3792	2438	3452	3211	3278	3304	3549	3440	3384	3439	3382.05	3311	3453	1.042	0.06	1.581	0.113911	0.170243	0.000391987	0.00240876	0.00107195	0.00107195	TRUE	0.0100239	No
orf19.2948	1555	1073	1327	1728	1707	1436	1615	1078	1395	1366	1358	1425	1460	1370	1441	1520	1416.9	1386	1448	1.042	0.06	1.244	0.21354	0.290984	0.000369655	0.00300408	0.00150311	0.00150311	TRUE	0.0153554	No
orf19.2949	1092	789	1017	1249	1273	1268	1302	805	980	1004	1040	1030	1089	1210	1162	1135	1081.29	1014	1149	1.133	0.181	3.403	0.000666543	0.00174113	0.000603567	0.00332208	0.00177624	0.00177624	TRUE	0.0163996	No
orf19.295	138	97	125	160	158	119	141	88	124	123	128	132	135	114	126	124	125.72	127	125	0.983	-0.024	-0.198	0.843109	0.880479	1e-08	0.013527	0.00660453	0.00660453	TRUE	0.0400522	No
orf19.2951	746	516	598	775	699	637	691	468	669	657	612	639	598	608	617	660	632.42	644	621	0.96	-0.058	-0.937	0.348988	0.436528	1e-08	0.004275	0.00216122	0.00216122	TRUE	0.0183383	No
orf19.2952	717	439	629	724	568	493	566	375	643	559	644	597	486	470	505	529	554.1	611	498	0.811	-0.302	-4.234	2.29608e-05	7.90084e-05	0.00143792	0.00459944	0.00306177	0.00306177	TRUE	0.033967	No
orf19.2953	2509	1642	2145	2602	2016	1753	1780	1150	2251	2090	2195	2146	1724	1673	1588	1622	1911.07	2170	1652	0.761	-0.394	-8.642	5.53146e-18	8.60958e-17	0.000634023	0.00273915	0.00145934	0.00145934	TRUE	0.0110284	No
orf19.2954	4650	2978	3762	4638	4402	3651	3861	2482	4172	3791	3849	3825	3765	3484	3445	3501	3728.83	3909	3549	0.908	-0.14	-2.952	0.00315282	0.00712379	0.00150732	0.00236884	0.00187624	0.00187624	TRUE	0.0251529	No
orf19.2956	1363	906	1106	1393	1360	1200	1286	876	1223	1153	1132	1149	1163	1145	1148	1236	1168.45	1164	1173	1.005	0.007	0.138	0.890425	0.917139	0.00030728	0.00322194	0.00160602	0.00160602	TRUE	0.0143573	No
orf19.2957	22	7	22	22	19	29	25	15	20	9	23	18	16	28	22	21	19.59	18	22	1.238	0.308	0.924	0.355301	0.442886	0.0189542	0.0761015	0.0556276	0.0556276	TRUE	0.389391	No
orf19.2958	270	186	258	290	399	328	386	240	242	237	264	239	341	313	344	338	289.91	246	334	1.361	0.445	5.214	1.8496e-07	8.73618e-07	1e-08	0.00698699	0.00347872	0.00347872	TRUE	0.0274931	No
orf19.2959	18	9	15	23	7	7	8	3	16	11	15	19	6	7	7	4	10.74	15	6	0.391	-1.354	-3.095	0.00197067	NA	1e-08	0.137094	0.070922	0.070922	TRUE	0.121205	No
orf19.2959.1	2735	2083	2388	3269	2842	2460	2334	1436	2454	2652	2443	2696	2431	2347	2083	2025	2391.27	2561	2222	0.868	-0.203	-3.046	0.00231721	0.00539395	0.00471656	0.00258661	0.00386045	0.00386045	TRUE	0.0488672	No
orf19.296	41	31	43	43	53	48	53	39	37	39	44	35	45	46	47	55	43.64	39	48	1.237	0.307	1.494	0.135129	0.19758	1e-08	0.0352443	0.0174354	0.0174354	TRUE	0.0591077	No
orf19.2960	3931	2608	3296	4126	3469	3054	3227	2007	3527	3320	3372	3402	2967	2914	2880	2831	3151.54	3405	2898	0.851	-0.233	-6.334	2.38877e-10	1.65152e-09	0.000210316	0.00244015	0.000974118	0.000974118	TRUE	0.00702603	No
orf19.2961	832	639	762	929	720	663	719	420	746	814	780	766	616	633	642	592	698.49	776	621	0.803	-0.317	-5.372	7.80759e-08	3.88955e-07	1e-08	0.00405787	0.0019016	0.0019016	TRUE	0.0111053	No
orf19.2962	1089	813	970	1183	916	899	972	572	977	1035	992	976	783	858	867	807	911.9	995	829	0.835	-0.261	-4.647	3.36146e-06	1.31653e-05	0.000459251	0.00357148	0.00191075	0.00191075	TRUE	0.0185457	No
orf19.2963	145	108	123	147	156	140	156	73	130	137	126	121	133	134	139	103	127.97	128	127	1.003	0.004	0.033	0.973335	0.981398	1e-08	0.0133232	0.00808255	0.00808255	TRUE	0.130322	No
orf19.2964	4447	2939	3983	4699	5263	4679	4934	3174	3989	3742	4075	3875	4501	4465	4403	4477	4190.75	3920	4462	1.137	0.186	5.052	4.37817e-07	1.95424e-06	0.000404347	0.00232593	0.00105649	0.00105649	TRUE	0.0107279	No
orf19.2965	2394	1721	2144	2604	2193	2016	2040	1416	2148	2191	2194	2147	1876	1924	1820	1997	2037.02	2170	1904	0.876	-0.191	-4.519	6.22446e-06	2.33875e-05	0.000189051	0.00269218	0.00121282	0.00121282	TRUE	0.0117208	No
orf19.2965.1	381	275	333	412	443	410	434	249	342	350	341	340	379	391	387	351	360.11	343	377	1.104	0.143	1.899	0.0575616	0.0949562	1e-08	0.0060108	0.00267802	0.00267802	TRUE	0.0197756	No
orf19.2966	245	167	223	258	268	265	241	135	220	213	228	213	229	253	215	190	220.1	218	222	1.023	0.032	0.311	0.755983	0.809472	0.00188576	0.00857511	0.00576792	0.00576792	TRUE	0.0916789	No
orf19.2967	9018	5902	7684	9418	8542	7044	7680	4656	8090	7514	7861	7766	7305	6721	6853	6567	7334.77	7808	6862	0.879	-0.186	-4.321	1.55208e-05	5.50142e-05	0.00135885	0.00217744	0.00164096	0.00164096	TRUE	0.0233017	No
orf19.2968	385	266	296	382	352	318	331	191	345	339	303	315	301	303	295	269	308.89	326	292	0.903	-0.148	-1.742	0.0815383	0.128679	1e-08	0.00667932	0.00367684	0.00367684	TRUE	0.0252825	No
orf19.2969	19429	12886	17097	20765	22894	19524	21950	13394	17430	16405	17492	17123	19580	18629	19587	18891	18142.1	17112	19172	1.12	0.164	4.786	1.70273e-06	6.94971e-06	0.000673022	0.00205954	0.00107032	0.00107032	TRUE	0.00932703	No
orf19.297	873	471	710	877	900	618	696	432	783	600	726	723	770	590	621	609	677.77	708	648	0.914	-0.13	-1.281	0.200214	0.274758	0.0121256	0.00412141	0.00835585	0.00835585	TRUE	0.196258	No
orf19.2970	2657	1728	2421	2818	2833	2542	2639	1669	2384	2200	2477	2324	2423	2425	2355	2354	2367.68	2346	2389	1.018	0.026	0.572	0.567653	0.6469	0.000801953	0.00259266	0.00152108	0.00152108	TRUE	0.0197911	No
orf19.2971	745	532	598	831	739	781	815	511	668	677	612	685	632	745	727	721	683.49	660	706	1.067	0.094	1.324	0.185388	0.257767	0.00274219	0.00410349	0.00337564	0.00337564	TRUE	0.0632507	No
orf19.2972	8609	6503	7831	9824	11936	11120	11897	7501	7723	8279	8012	8101	10208	10610	10616	10579	9266.13	8029	10503	1.308	0.388	11.659	2.07341e-31	8.14106e-30	0.000448093	0.00213619	0.000952526	0.000952526	TRUE	0.00806432	No
orf19.2973	4983	3583	4723	5519	7081	6572	7268	4692	4470	4562	4832	4551	6056	6271	6485	6618	5480.59	4604	6358	1.38	0.465	11.04	2.45674e-28	8.20006e-27	0.00108904	0.0022444	0.00151613	0.00151613	TRUE	0.013599	No
orf19.2974	1422	1058	1273	1486	1466	1459	1523	850	1276	1347	1302	1225	1254	1392	1359	1199	1294.27	1288	1301	1.013	0.019	0.323	0.746395	0.80106	0.00228405	0.00310116	0.00264183	0.00264183	TRUE	0.0302804	No
orf19.2975	977	683	875	1076	1002	909	932	565	876	870	895	887	857	867	832	797	860.16	882	838	0.952	-0.071	-1.337	0.181149	0.252927	1e-08	0.00366722	0.00153507	0.00153507	TRUE	0.0109329	No
orf19.2977	5996	4076	5045	6471	5616	4918	5560	3655	5379	5189	5162	5336	4803	4693	4961	5155	5084.73	5266	4903	0.93	-0.105	-2.668	0.00762215	0.0157747	0.000785112	0.00226503	0.00128182	0.00128182	TRUE	0.0138345	No
orf19.2978	2038	1333	1722	2142	1714	1373	1509	937	1828	1697	1762	1766	1466	1310	1347	1322	1562.18	1763	1361	0.772	-0.373	-7.256	3.97497e-13	3.87156e-12	0.00115653	0.0029088	0.00188172	0.00188172	TRUE	0.0337459	No
orf19.298	54	38	40	50	41	31	41	25	48	48	41	41	35	30	37	35	39.43	44	34	0.765	-0.387	-1.79	0.0734534	0.117432	1e-08	0.0387937	0.0192236	0.0192236	TRUE	0.0603241	No
orf19.2980	1688	1153	1563	1913	1748	1491	1590	1055	1514	1468	1599	1577	1495	1423	1419	1488	1497.9	1540	1456	0.944	-0.083	-1.746	0.0808668	0.12772	0.000439747	0.00294868	0.00149667	0.00149667	TRUE	0.0108218	No
orf19.2982	343	226	274	359	300	305	303	180	308	288	280	296	257	291	270	254	280.45	293	268	0.915	-0.128	-1.468	0.142076	0.206086	1e-08	0.00715577	0.00372654	0.00372654	TRUE	0.0374762	No
orf19.2983	1318	873	1138	1460	1205	1038	1141	802	1182	1111	1164	1204	1031	990	1018	1131	1104.04	1165	1042	0.891	-0.167	-3.001	0.00268686	0.00617546	0.00109732	0.00329442	0.00206699	0.00206699	TRUE	0.0345365	No
orf19.2984	1274	907	1196	1436	1743	1468	1625	991	1143	1155	1224	1184	1491	1401	1450	1398	1305.57	1176	1435	1.221	0.288	5.996	2.02765e-09	1.23426e-08	1e-08	0.00309145	0.00144344	0.00144344	TRUE	0.00855214	No
orf19.2985	1246	837	1098	1261	1329	1076	1191	775	1118	1066	1123	1040	1137	1027	1063	1093	1083.21	1087	1080	0.994	-0.009	-0.167	0.867377	0.898638	0.000864557	0.0033197	0.00192645	0.00192645	TRUE	0.0165098	No
orf19.2986	422	267	340	463	547	411	447	335	379	340	348	382	468	392	399	472	397.44	362	433	1.189	0.25	2.82	0.00480155	0.0104031	0.00434696	0.0056322	0.00499421	0.00499421	TRUE	0.0454897	No
orf19.2987	3828	2593	3276	4076	4280	3590	3913	2598	3434	3301	3352	3361	3660	3425	3492	3664	3461.23	3362	3560	1.058	0.081	2.145	0.0319136	0.0566097	0.000422475	0.00239894	0.00109169	0.00109169	TRUE	0.00788355	No
orf19.2988	1715	1129	1598	1908	2356	2005	2120	1461	1539	1437	1635	1573	2015	1913	1892	2061	1758.07	1546	1970	1.272	0.347	6.608	3.89551e-11	3.00439e-10	0.00150218	0.00280526	0.00206267	0.00206267	TRUE	0.0249898	No
orf19.2989	3087	2039	2686	3239	4404	3676	4081	2654	2769	2596	2748	2671	3766	3508	3642	3743	3180.37	2696	3665	1.358	0.442	10.86	1.78003e-27	5.65843e-26	0.000518838	0.00243598	0.00126442	0.00126442	TRUE	0.0102146	No
orf19.299	2704	1855	2376	2957	2983	2681	2891	2089	2426	2362	2431	2438	2551	2558	2580	2946	2536.5	2414	2659	1.099	0.136	2.585	0.00973159	0.0196661	0.00218952	0.00255185	0.00226387	0.00226387	TRUE	0.060976	No
orf19.2990	2606	1903	2511	2800	2176	1913	2027	1418	2338	2423	2569	2309	1861	1825	1809	2000	2141.69	2410	1874	0.777	-0.364	-7.085	1.39322e-12	1.25307e-11	0.0016163	0.00265735	0.00206239	0.00206239	TRUE	0.0243341	No
orf19.2991	122	65	97	99	123	93	104	90	109	83	99	82	105	89	93	127	98.34	93	104	1.096	0.132	0.817	0.413911	0.502137	0.0122968	0.0167411	0.014836	0.014836	TRUE	0.186834	No
orf19.2992	7391	4892	6203	8009	6796	5684	5906	4283	6630	6228	6346	6604	5812	5423	5270	6041	6044.46	6452	5636	0.873	-0.196	-3.94	8.15334e-05	0.000252501	0.00220581	0.00221969	0.00221557	0.00221557	TRUE	0.0275862	No
orf19.2994	24238	14687	19368	24018	21751	17635	19237	12741	21744	18698	19815	19806	18602	16827	17166	17970	18828.5	20016	17641	0.881	-0.182	-3.459	0.000542855	0.00145277	0.00295752	0.00205662	0.00261813	0.00261813	TRUE	0.041388	No
orf19.2994.1	12613	8248	10234	12820	12694	10396	10736	7298	11315	10501	10470	10572	10856	9920	9580	10293	10438.4	10714	10162	0.948	-0.077	-1.61	0.107391	0.162071	0.00202574	0.0021186	0.00207305	0.00207305	TRUE	0.026218	No
orf19.2995	1070	685	915	1028	1175	947	1102	722	960	872	936	848	1005	904	983	1018	940.75	904	978	1.08	0.111	1.763	0.0778592	0.123653	0.00212286	0.00352266	0.0027508	0.0027508	TRUE	0.031166	No
orf19.2996	1782	1294	1724	1960	1800	1702	1918	1109	1599	1647	1764	1616	1539	1624	1711	1564	1633.14	1656	1610	0.973	-0.04	-0.748	0.454313	0.540176	0.00155884	0.00286842	0.00208755	0.00208755	TRUE	0.0230853	No
orf19.2998	2798	1762	2336	2875	2590	2077	2170	1361	2510	2243	2390	2371	2215	1982	1936	1920	2195.85	2378	2013	0.847	-0.24	-4.146	3.38542e-05	0.000112747	0.00276285	0.00264063	0.0027563	0.0027563	TRUE	0.056336	No
orf19.30	2387	1841	2302	2794	2565	2389	2494	1575	2141	2344	2355	2304	2194	2280	2225	2221	2258.05	2286	2230	0.976	-0.035	-0.791	0.429235	0.516304	0.000694844	0.00262242	0.00141397	0.00141397	TRUE	0.0224521	No
orf19.300	1617	1021	1402	1761	1720	1360	1463	998	1451	1300	1434	1452	1471	1298	1305	1408	1389.84	1409	1370	0.971	-0.043	-0.716	0.473726	0.559705	0.00223978	0.00302403	0.00272432	0.00272432	TRUE	0.0315733	No
orf19.3000	656	473	564	677	715	605	672	469	589	602	577	558	611	577	600	661	596.98	582	612	1.051	0.072	1.11	0.267019	0.351306	1e-08	0.00441125	0.00238171	0.00238171	TRUE	0.0289051	No
orf19.3001	194	101	129	178	216	199	247	140	174	129	132	147	185	190	220	197	171.73	146	198	1.355	0.439	3.547	0.000389192	0.00107641	0.00665303	0.0104328	0.00874977	0.00874977	TRUE	0.187804	No
orf19.3002	14303	9337	11665	14714	14698	12055	12543	8012	12831	11887	11934	12133	12570	11502	11193	11300	11918.9	12196	11641	0.955	-0.067	-1.431	0.152328	0.218474	0.00200386	0.00210132	0.00202654	0.00202654	TRUE	0.0355305	No
orf19.3003	1779	1224	1765	2020	2850	2656	2765	1658	1596	1558	1806	1666	2437	2534	2467	2338	2050.4	1656	2444	1.476	0.562	10.447	1.51105e-25	4.00728e-24	0.00204645	0.00268753	0.00226736	0.00226736	TRUE	0.0435101	No
orf19.3003.1	14497	9513	11804	14988	14572	12058	12889	9273	13005	12111	12077	12359	12462	11505	11501	13079	12262.5	12388	12137	0.979	-0.03	-0.597	0.550361	0.631266	0.00227089	0.00209791	0.00236056	0.00236056	TRUE	0.0329218	No
orf19.3004	6390	4444	5553	6505	6796	6407	6991	4045	5732	5658	5681	5364	5812	6113	6238	5705	5788.06	5609	5967	1.065	0.09	2.157	0.0310413	0.0552596	0.00108621	0.00223033	0.00151206	0.00151206	TRUE	0.0114138	No
orf19.3006	2980	1947	2600	3234	3130	2872	3002	1994	2673	2479	2660	2667	2677	2740	2679	2812	2673.42	2620	2727	1.039	0.055	1.347	0.178111	0.249729	0.000422665	0.00252254	0.00122443	0.00122443	TRUE	0.0149018	No
orf19.3007	792	572	696	888	759	605	664	423	711	728	712	732	649	577	593	597	662.32	721	604	0.839	-0.253	-4.133	3.58341e-05	0.00011888	1e-08	0.00417136	0.00208693	0.00208693	TRUE	0.032675	No
orf19.3007.2	1100	716	942	1173	912	802	859	441	987	912	964	967	780	765	767	622	845.39	958	734	0.769	-0.379	-5.265	1.40088e-07	6.73317e-07	0.00413104	0.00369672	0.00376287	0.00376287	TRUE	0.109877	No
orf19.3008	1304	903	1138	1361	1449	1221	1343	805	1170	1150	1164	1122	1239	1165	1198	1135	1168.01	1152	1184	1.031	0.044	0.9	0.368118	0.456838	1e-08	0.00322241	0.00145345	0.00145345	TRUE	0.0116906	No
orf19.3009	481	378	459	564	655	672	730	470	432	481	470	465	560	641	651	663	545.39	462	629	1.361	0.444	5.919	3.24066e-09	1.91822e-08	0.00250974	0.0046413	0.00352533	0.00352533	TRUE	0.0671168	No
orf19.301	1622	979	1463	1610	2355	1843	2078	1646	1455	1246	1497	1328	2014	1759	1854	2322	1684.29	1382	1987	1.436	0.522	5.943	2.7994e-09	1.66853e-08	0.0103655	0.00284143	0.00678513	0.00678513	TRUE	0.150819	No
orf19.3010	436	321	368	449	602	468	500	277	391	409	377	370	515	447	446	391	418.1	387	450	1.171	0.227	2.567	0.0102471	0.0205834	0.00480564	0.00545165	0.00513174	0.00513174	TRUE	0.11179	No
orf19.3010.1	9211	6493	8605	10298	9256	7967	8283	6021	8263	8266	8804	8492	7916	7602	7391	8492	8153.29	8456	7850	0.928	-0.108	-2.232	0.0256095	0.046653	0.00215415	0.00215757	0.00213107	0.00213107	TRUE	0.0362003	No
orf19.3012	1296	859	1161	1390	1251	1127	1248	866	1163	1094	1188	1146	1070	1075	1114	1221	1133.82	1148	1120	0.972	-0.041	-0.717	0.473158	0.559263	0.00139667	0.00325989	0.0022039	0.0022039	TRUE	0.0398226	No
orf19.3013	992	686	842	1118	1270	1113	1134	715	890	873	861	922	1086	1062	1012	1008	964.39	886	1042	1.176	0.233	4.378	1.19897e-05	4.31341e-05	1e-08	0.00348483	0.00168624	0.00168624	TRUE	0.0099802	No
orf19.3014	8939	6045	7557	9582	9551	8316	8868	6199	8019	7696	7732	7901	8168	7935	7913	8743	8013.46	7837	8190	1.044	0.062	1.54	0.123547	0.182961	0.0011326	0.00216068	0.00144917	0.00144917	TRUE	0.0245218	No
orf19.3015	12993	8738	11763	14410	11540	9842	10909	7214	11656	11124	12035	11883	9869	9391	9734	10175	10733.4	11674	9792	0.838	-0.254	-6.534	6.4246e-11	4.81284e-10	0.00100724	0.00211477	0.0013613	0.0013613	TRUE	0.0120873	No
orf19.3016	1422	919	1170	1450	1434	1138	1319	717	1276	1170	1197	1196	1226	1086	1177	1011	1167.36	1210	1125	0.932	-0.101	-1.543	0.122751	0.181961	0.00318714	0.0032231	0.0032585	0.0032585	TRUE	0.0509602	No
orf19.3018	1330	859	1148	1396	1072	961	1032	645	1193	1094	1175	1151	917	917	921	910	1034.6	1153	916	0.794	-0.334	-6.649	2.94479e-11	2.2977e-10	1e-08	0.00338268	0.0014379	0.0014379	TRUE	0.0129124	No
orf19.3019	512	321	459	594	414	359	385	223	459	409	470	490	354	343	344	315	397.76	457	339	0.741	-0.432	-5.365	8.10573e-08	4.02473e-07	0.00139005	0.0056292	0.00365545	0.00365545	TRUE	0.0522864	No
orf19.302	266	211	286	308	344	306	314	185	239	269	293	254	294	292	280	261	272.64	264	282	1.077	0.106	1.14	0.254084	0.336686	0.00136689	0.00730409	0.00468615	0.00468615	TRUE	0.0639008	No
orf19.3021	2103	1416	1787	2235	2105	1788	1903	1197	1887	1803	1828	1843	1800	1706	1698	1688	1781.66	1840	1723	0.937	-0.094	-2.217	0.0266229	0.048338	1e-08	0.00279432	0.00117297	0.00117297	TRUE	0.011465	No
orf19.3022	3627	2303	2994	3680	3917	3129	3530	2247	3254	2932	3063	3035	3350	2986	3150	3169	3117.27	3071	3164	1.03	0.042	0.859	0.390443	0.479318	0.00163841	0.00244522	0.0020164	0.0020164	TRUE	0.0197538	No
orf19.3023	1575	1138	1327	1661	1908	1522	1653	988	1413	1449	1358	1370	1632	1452	1475	1393	1442.7	1398	1488	1.068	0.095	1.657	0.0976114	0.149719	0.00185849	0.00298576	0.00243849	0.00243849	TRUE	0.0517922	No
orf19.3026	2822	1795	2386	3040	3352	2780	3176	2058	2532	2285	2441	2507	2867	2653	2834	2903	2627.6	2441	2814	1.151	0.203	4.222	2.41803e-05	8.29196e-05	0.00130018	0.002532	0.00182879	0.00182879	TRUE	0.0213645	No
orf19.3027	4664	3297	4105	5106	5752	5138	5548	3635	4184	4197	4200	4210	4919	4903	4951	5127	4586.39	4198	4975	1.184	0.244	7.919	2.38681e-15	2.83398e-14	1e-08	0.00229605	0.00068931	0.00068931	TRUE	0.0047357	No
orf19.3029	3475	2425	2978	3719	3221	3017	3105	2089	3117	3087	3047	3067	2755	2879	2771	2946	2958.59	3080	2838	0.92	-0.12	-3.226	0.00125536	0.00309869	0.000111296	0.0024702	0.000988726	0.000988726	TRUE	0.00738055	No
orf19.3030	1998	1316	1716	1999	2078	1852	2059	1314	1792	1675	1756	1648	1777	1767	1837	1853	1763.34	1718	1808	1.052	0.073	1.599	0.109862	0.165177	0.000524497	0.00280279	0.0014244	0.0014244	TRUE	0.0107088	No
orf19.3031	1953	1213	1594	1994	1859	1452	1532	934	1752	1544	1631	1644	1590	1385	1367	1317	1528.89	1643	1415	0.862	-0.214	-3.215	0.00130286	0.00319884	0.00407259	0.00292904	0.00360423	0.00360423	TRUE	0.0849904	No
orf19.3034	12099	8194	10891	12882	10893	9671	10661	6499	10854	10432	11143	10623	9316	9228	9513	9166	10034.3	10763	9306	0.865	-0.21	-6.5	8.02542e-11	5.92343e-10	0.000403929	0.0021242	0.000898944	0.000898944	TRUE	0.00682226	No
orf19.3035	4352	2894	3932	4428	5029	3987	4634	2806	3904	3684	4023	3651	4301	3804	4135	3958	3932.59	3816	4050	1.062	0.086	1.674	0.0941478	0.145633	0.00216203	0.00234867	0.0022972	0.0022972	TRUE	0.0215877	No
orf19.3037	28281	17948	24753	30083	25733	21208	23228	15940	25371	22850	25325	24807	22008	20236	20727	22482	22975.6	24588	21363	0.869	-0.203	-4.155	3.25612e-05	0.000108985	0.00232702	0.00204271	0.0022528	0.0022528	TRUE	0.027589	No
orf19.3038	54323	36996	49374	58046	70134	61043	66769	41592	48733	47100	50514	47865	59981	58245	59580	58662	53835.2	48553	59117	1.218	0.284	9.223	2.8838e-20	5.36405e-19	0.000523941	0.00200649	0.00089205	0.00089205	TRUE	0.00903929	No
orf19.304	1911	1374	1699	2139	1662	1502	1561	959	1714	1749	1738	1764	1421	1433	1393	1353	1570.72	1741	1400	0.805	-0.313	-7.424	1.13362e-13	1.14084e-12	1e-08	0.00290375	0.00105808	0.00105808	TRUE	0.00532409	No
orf19.3040	6745	4544	5706	6978	6462	5643	6012	3867	6051	5785	5838	5754	5527	5384	5365	5454	5644.69	5857	5432	0.927	-0.109	-3.426	0.000612777	0.00161472	0.000212282	0.0022367	0.000790787	0.000790787	TRUE	0.00619897	No
orf19.3041	7198	4981	6557	7856	7375	6559	7263	4379	6457	6341	6708	6478	6307	6258	6481	6176	6401.03	6496	6306	0.971	-0.043	-1.303	0.192635	0.265813	0.000280064	0.00220631	0.000869669	0.000869669	TRUE	0.0058058	No
orf19.3042	176	155	150	207	207	206	203	164	158	197	153	171	177	197	181	231	183.18	170	196	1.153	0.205	1.686	0.0918685	0.14244	0.0073097	0.00990461	0.00869537	0.00869537	TRUE	0.13138	No
orf19.3043	344	219	291	382	415	374	385	289	309	279	298	315	355	357	344	408	332.88	300	366	1.208	0.273	3.218	0.00129192	0.00317458	0.000726935	0.0063405	0.00387043	0.00387043	TRUE	0.0576289	No
orf19.3045	2400	1494	2018	2418	2070	1896	2045	1304	2153	1902	2065	1994	1770	1809	1825	1839	1919.63	2028	1811	0.891	-0.166	-3.466	0.00052797	0.00141672	0.000985916	0.00273576	0.00167671	0.00167671	TRUE	0.02078	No
orf19.3047	3904	2839	3571	4252	5448	5084	5647	3470	3502	3614	3653	3506	4659	4851	5039	4894	4214.98	3569	4861	1.362	0.446	11.765	5.91596e-32	2.40156e-30	0.00058203	0.00232394	0.00113607	0.00113607	TRUE	0.00984216	No
orf19.3048	164	93	144	209	161	133	169	117	147	118	147	172	138	127	151	165	145.7	146	145	0.979	-0.031	-0.226	0.821252	0.862451	0.0100546	0.011943	0.0111168	0.0111168	TRUE	0.155955	No
orf19.3049	57	36	49	75	66	50	44	40	51	46	50	62	56	48	39	56	51.1	52	50	0.943	-0.085	-0.418	0.67621	0.741163	1e-08	0.0303901	0.0198742	0.0198742	TRUE	0.185058	No
orf19.305	370	297	345	447	419	403	433	256	332	378	353	369	358	385	386	361	365.24	358	372	1.044	0.062	0.797	0.425325	0.512608	1e-08	0.00595416	0.00313814	0.00313814	TRUE	0.0283704	No
orf19.3050	4282	3046	3785	4665	3777	3618	3968	2156	3841	3878	3872	3847	3230	3452	3541	3041	3587.82	3860	3316	0.86	-0.217	-4.359	1.30711e-05	4.67726e-05	0.00194339	0.00238414	0.00210237	0.00210237	TRUE	0.0359351	No
orf19.3051	1846	1171	1494	1973	1054	947	975	623	1656	1491	1529	1627	901	904	870	879	1232.01	1576	888	0.563	-0.828	-15.623	5.07764e-55	6.63184e-53	0.000872311	0.00315785	0.00181669	0.00181669	TRUE	0.0149184	No
orf19.3052	9743	6589	8153	10429	8718	7438	7966	4471	8740	8388	8341	8600	7456	7097	7108	6306	7754.69	8517	6992	0.821	-0.284	-5.539	3.04385e-08	1.58988e-07	0.00248793	0.00216673	0.0023918	0.0023918	TRUE	0.0520237	No
orf19.3053	1390	958	1251	1539	1732	1474	1508	1156	1247	1220	1280	1269	1481	1406	1346	1630	1359.92	1254	1466	1.166	0.221	3.583	0.00034002	0.000950158	0.00275282	0.00304701	0.00291632	0.00291632	TRUE	0.0637966	No
orf19.3054	8611	6036	7633	9384	7752	6709	7329	4716	7725	7684	7809	7738	6630	6402	6540	6651	7147.45	7739	6556	0.847	-0.24	-8.612	7.19167e-18	1.10223e-16	1e-08	0.00218263	0.000603522	0.000603522	TRUE	0.00305992	No
orf19.3055	1661	1165	1509	1835	1848	1666	1752	1145	1490	1483	1544	1513	1580	1590	1563	1615	1547.34	1508	1587	1.052	0.073	1.749	0.0803161	0.126984	1e-08	0.00291772	0.00100681	0.00100681	TRUE	0.00302836	No
orf19.3057	603	412	545	626	742	578	690	366	541	525	558	516	635	552	616	516	557.16	535	580	1.089	0.122	1.591	0.111566	0.167321	0.00321109	0.00458506	0.00388962	0.00388962	TRUE	0.0558323	No
orf19.3058	1208	784	1080	1286	1142	970	1024	702	1084	998	1105	1060	977	926	914	990	1006.66	1062	952	0.894	-0.162	-2.954	0.00313976	0.00709695	0.000546129	0.00342162	0.001898	0.001898	TRUE	0.0175137	No
orf19.3059	27978	17911	24558	29976	32410	26084	28912	18704	25099	22803	25125	24719	27718	24889	25799	26380	25316.5	24436	26196	1.072	0.1	2.159	0.0308721	0.0549895	0.00199386	0.00203687	0.00202987	0.00202987	TRUE	0.0246596	No
orf19.3059.1	6	1	4	4	0	4	1	2	5	1	4	3	0	4	1	3	2.7	3	2	0.5	-1	-1.08	0.280262	NA	0.00723395	0.540235	0.406036	0.406036	TRUE	0.413405	No
orf19.306	150	122	143	188	211	191	198	133	135	155	146	155	180	182	177	188	164.77	148	182	1.229	0.298	2.748	0.00599716	0.0127384	1e-08	0.0107898	0.00516709	0.00516709	TRUE	0.0409188	No
orf19.3060	1308	915	1128	1447	963	829	850	519	1173	1165	1154	1193	824	791	758	732	973.83	1171	776	0.664	-0.59	-10.993	4.1205e-28	1.36022e-26	1e-08	0.00347023	0.00169497	0.00169497	TRUE	0.0202798	No
orf19.3061	359	234	256	392	402	300	331	203	322	298	262	323	344	286	295	286	302.11	301	303	1.006	0.009	0.089	0.928995	0.949016	0.0057417	0.00678477	0.00627609	0.00627609	TRUE	0.0985614	No
orf19.3061.1	6573	4627	5633	7117	7120	6400	6402	4724	5897	5891	5763	5869	6089	6107	5713	6663	5998.83	5855	6143	1.048	0.068	1.439	0.150082	0.215871	0.00186381	0.00222152	0.00198335	0.00198335	TRUE	0.0385202	No
orf19.3062	1036	812	998	1148	996	1070	1073	689	929	1034	1021	947	852	1021	957	972	966.61	983	950	0.968	-0.048	-0.697	0.485898	0.571286	0.00339017	0.00348137	0.00343108	0.00343108	TRUE	0.0612614	No
orf19.3063	809	497	661	782	786	626	662	451	726	633	676	645	672	597	591	636	646.99	670	624	0.93	-0.104	-1.477	0.139746	0.20307	0.00237691	0.00422329	0.0032453	0.0032453	TRUE	0.0381597	No
orf19.3064	3001	2014	2453	2995	3040	2479	2638	1653	2692	2564	2510	2470	2600	2365	2354	2331	2485.79	2559	2412	0.944	-0.084	-1.663	0.0963461	0.148043	0.0015358	0.00256352	0.00201993	0.00201993	TRUE	0.0339264	No
orf19.3064.1	411	335	377	443	465	369	398	292	369	426	386	365	398	352	355	412	382.87	386	379	0.982	-0.027	-0.315	0.752467	0.806138	0.00272014	0.00577114	0.00433558	0.00433558	TRUE	0.0504737	No
orf19.3065	1260	818	1037	1384	1035	935	1024	648	1130	1041	1061	1141	885	892	914	914	997.37	1093	901	0.822	-0.283	-5.32	1.04025e-07	5.0936e-07	1e-08	0.00343505	0.00170376	0.00170376	TRUE	0.0114418	No
orf19.3066	1999	1300	1799	2103	2177	1998	2210	1464	1793	1655	1841	1734	1862	1906	1972	2065	1853.53	1756	1951	1.109	0.149	2.926	0.00343173	0.00767604	0.00133894	0.00276273	0.00194768	0.00194768	TRUE	0.0171616	No
orf19.307	2123	1519	1883	2402	2587	2168	2440	1674	1905	1934	1926	1981	2212	2069	2177	2361	2070.63	1936	2205	1.137	0.185	3.864	0.000111445	0.000338333	0.000990743	0.00268061	0.00170745	0.00170745	TRUE	0.0253016	No
orf19.3071	5856	4051	5643	6628	7979	6977	7846	5231	5253	5157	5773	5466	6824	6657	7001	7378	6188.74	5412	6965	1.286	0.363	7.492	6.79472e-14	7.01421e-13	0.00203617	0.00221409	0.00208879	0.00208879	TRUE	0.0243638	No
orf19.3073	0	0	0	0	0	0	0	0	0	0	0	0	0	0	0	0	0	0	0	NA	NA	NA	NA	NA	NA	NA	NA	NA	NA	NA	NA
orf19.3074	126	63	111	131	131	105	135	84	113	80	114	108	112	100	120	118	108.25	104	112	1.077	0.107	0.739	0.459843	0.545564	0.0031992	0.0153903	0.0108066	0.0108066	TRUE	0.188937	No
orf19.3076	784	487	678	896	859	680	728	410	703	620	694	739	735	649	650	578	670.9	689	653	0.949	-0.076	-0.928	0.353212	0.440635	0.00543691	0.00414333	0.00491635	0.00491635	TRUE	0.0844579	No
orf19.3077	1583	1007	1468	1816	1978	1515	1807	1255	1420	1282	1502	1497	1692	1446	1612	1770	1527.66	1425	1630	1.141	0.19	2.619	0.00882256	0.0180292	0.00534109	0.0029298	0.00440715	0.00440715	TRUE	0.0698637	No
orf19.308	1811	1290	1563	1983	1505	1358	1386	999	1625	1642	1599	1635	1287	1296	1237	1409	1466.24	1625	1307	0.802	-0.318	-6.481	9.14123e-11	6.7058e-10	0.000496543	0.00296961	0.00162515	0.00162515	TRUE	0.0293495	No
orf19.3080	1112	727	1083	1230	1504	1116	1390	976	998	926	1108	1014	1286	1065	1240	1377	1126.68	1012	1242	1.225	0.293	3.583	0.000339358	0.000949191	0.00711744	0.003268	0.00553307	0.00553307	TRUE	0.110624	No
orf19.3083	1508	927	1324	1599	2265	1788	2188	1480	1353	1180	1355	1319	1937	1706	1952	2087	1611.14	1302	1920	1.472	0.558	8.05	8.26172e-16	1.02767e-14	0.0045487	0.00288056	0.00396974	0.00396974	TRUE	0.0683167	No
orf19.3084	1482	953	1241	1583	2281	1752	1942	1114	1330	1213	1270	1305	1951	1672	1733	1571	1505.55	1280	1732	1.355	0.438	6.434	1.24217e-10	8.9178e-10	0.00417285	0.00294376	0.0037652	0.0037652	TRUE	0.0883779	No
orf19.3086	2005	1332	1710	2085	2221	1752	1873	1160	1799	1696	1749	1719	1899	1672	1671	1636	1730.23	1741	1720	0.989	-0.016	-0.287	0.773873	0.823345	0.00219674	0.00281854	0.00244786	0.00244786	TRUE	0.0614025	No
orf19.3087	20020	12405	16533	20500	17946	13740	14644	10516	17960	15793	16915	16905	15348	13110	13067	14832	15491.2	16893	14089	0.834	-0.262	-4.19	2.78999e-05	9.44353e-05	0.00476005	0.00207323	0.00369382	0.00369382	TRUE	0.0446063	No
orf19.3087.1	169	102	123	171	195	125	132	90	152	130	126	141	167	119	118	127	134.89	137	133	0.969	-0.046	-0.321	0.748069	0.802142	0.01176	0.012742	0.01233	0.01233	TRUE	0.337778	No
orf19.3087.2	450	285	342	462	417	348	341	281	404	363	350	381	357	332	304	396	360.84	374	347	0.921	-0.118	-1.276	0.202019	0.276981	0.00490784	0.00600267	0.00548504	0.00548504	TRUE	0.0889225	No
orf19.3088	3047	1925	2389	3223	2957	2450	2577	1644	2733	2451	2444	2658	2529	2338	2300	2319	2471.38	2572	2372	0.922	-0.118	-2.187	0.0287456	0.051615	0.00208885	0.00256693	0.00236588	0.00236588	TRUE	0.0249626	No
orf19.3089	7413	4943	6154	7799	7642	6313	6747	3775	6650	6293	6296	6431	6536	6024	6021	5324	6196.84	6418	5976	0.932	-0.102	-1.755	0.0792977	0.125605	0.00359062	0.00221379	0.00307804	0.00307804	TRUE	0.0643784	No
orf19.309	280	196	240	321	375	315	362	242	251	250	246	265	321	301	323	341	287.07	253	322	1.266	0.34	4.01	6.06855e-05	0.000193524	1e-08	0.00703643	0.00339065	0.00339065	TRUE	0.0208333	No
orf19.3091	5241	3471	4748	5555	4879	4260	4653	2808	4702	4419	4858	4581	4173	4065	4152	3960	4363.62	4640	4088	0.881	-0.182	-4.535	5.75586e-06	2.17629e-05	0.000775164	0.00231221	0.00132252	0.00132252	TRUE	0.0119237	No
orf19.3093	2645	1713	2312	2821	2796	2320	2559	1712	2373	2181	2365	2326	2391	2214	2283	2415	2318.54	2311	2326	1.005	0.007	0.14	0.888437	0.915562	0.000914602	0.00260565	0.00166433	0.00166433	TRUE	0.0164567	No
orf19.3097	13516	8312	11675	13797	14516	11428	12973	7962	12125	10582	11945	11377	12415	10904	11576	11230	11519.2	11507	11531	1.002	0.003	0.053	0.957714	0.969529	0.00283327	0.00210555	0.00286611	0.00286611	TRUE	0.0354949	No
orf19.3098	1851	1214	1576	1905	1577	1434	1503	972	1661	1546	1612	1571	1349	1368	1341	1371	1477.31	1598	1357	0.849	-0.237	-5.35	8.79123e-08	4.34356e-07	1e-08	0.00296219	0.00119935	0.00119935	TRUE	0.00871821	No
orf19.3099	815	604	817	904	1047	869	972	652	731	769	836	745	895	829	867	920	824.12	770	878	1.139	0.188	3.001	0.00269001	0.00618034	0.00149348	0.00374104	0.00254789	0.00254789	TRUE	0.0393592	No
orf19.31	207	151	191	263	210	157	153	112	186	192	195	217	180	150	137	158	176.77	198	156	0.788	-0.343	-2.93	0.00338743	0.00758543	0.00413902	0.0101921	0.00744313	0.00744313	TRUE	0.126159	No
orf19.310	50	25	39	66	41	25	34	21	45	32	40	54	35	24	30	30	36.24	43	30	0.688	-0.539	-2.189	0.0285765	0.0513421	1e-08	0.0420424	0.0299614	0.0299614	TRUE	0.22305	No
orf19.3100	245	167	212	274	265	190	241	150	220	213	217	226	227	181	215	212	213.72	219	209	0.953	-0.07	-0.692	0.4891	0.574525	1e-08	0.00877197	0.00516002	0.00516002	TRUE	0.0902442	No
orf19.3102	1447	933	1214	1452	1733	1469	1581	989	1298	1188	1242	1197	1482	1402	1411	1395	1326.85	1231	1422	1.155	0.208	4.203	2.63687e-05	8.96057e-05	0.000522467	0.00307362	0.00159979	0.00159979	TRUE	0.0164737	No
orf19.3103	5881	4106	5400	6476	6955	5874	6537	3873	5276	5227	5525	5340	5948	5605	5833	5463	5527.1	5342	5712	1.07	0.098	2.493	0.0126758	0.0248389	0.00079227	0.00224217	0.00128839	0.00128839	TRUE	0.0101069	No
orf19.3104	1195	860	1107	1383	1316	1161	1297	706	1072	1095	1133	1140	1125	1108	1157	996	1103.29	1110	1096	0.991	-0.013	-0.233	0.815754	0.858027	0.00122492	0.00329532	0.00222817	0.00222817	TRUE	0.0406674	No
orf19.3105	1438	921	1266	1565	950	787	890	595	1290	1173	1295	1291	812	751	794	839	1030.64	1262	799	0.631	-0.664	-11.593	4.46668e-31	1.69847e-29	0.00100382	0.00338807	0.00212479	0.00212479	TRUE	0.0252769	No
orf19.3106	1495	1043	1369	1624	1358	1124	1185	878	1341	1328	1401	1339	1161	1072	1057	1238	1242.31	1352	1132	0.835	-0.26	-4.451	8.54807e-06	3.15072e-05	0.00197795	0.00314808	0.00245789	0.00245789	TRUE	0.0427109	No
orf19.3107	176	168	177	234	97	102	94	45	158	214	181	193	83	97	84	63	134.18	186	82	0.446	-1.165	-7.94	2.02579e-15	2.42933e-14	0.0106197	0.0127985	0.011947	0.011947	TRUE	0.158801	No
orf19.3108	619	376	455	592	407	371	367	198	555	479	466	488	348	354	327	279	412.06	497	327	0.661	-0.596	-6.552	5.66845e-11	4.30001e-10	0.00523796	0.00550253	0.00541715	0.00541715	TRUE	0.0930001	No
orf19.3109	25	28	17	34	27	26	42	20	22	36	17	28	23	25	37	28	27.14	26	28	1.108	0.148	0.506	0.612741	0.686718	0.0312141	0.0554763	0.0455298	0.0455298	TRUE	0.301124	No
orf19.3110	3568	2463	3112	3888	3812	3332	3537	2156	3201	3136	3184	3206	3260	3179	3156	3041	3170.37	3182	3159	0.994	-0.009	-0.252	0.801051	0.845523	8.20592e-05	0.00243742	0.000911554	0.000911554	TRUE	0.00700355	No
orf19.3111	55	39	66	74	51	38	50	37	49	50	68	61	44	36	45	52	50.53	57	44	0.767	-0.383	-1.884	0.0595993	0.0979143	1e-08	0.0307108	0.0195847	0.0195847	TRUE	0.125898	No
orf19.3112	585	410	548	737	513	486	535	348	525	522	561	608	439	464	477	491	510.73	554	468	0.841	-0.251	-3.345	0.000821431	0.00210454	0.00210001	0.00482191	0.00341586	0.00341586	TRUE	0.0534599	No
orf19.3113	418	210	323	385	501	413	471	304	375	267	330	317	428	394	420	429	370.23	322	418	1.289	0.366	3.804	0.000142425	0.000423818	0.00653108	0.00590056	0.00614307	0.00614307	TRUE	0.135532	No
orf19.3114	707	512	647	735	884	757	796	497	634	652	662	606	756	722	710	701	680.47	638	722	1.135	0.183	3.04	0.00236187	0.00548092	1e-08	0.00411292	0.00200255	0.00200255	TRUE	0.0147894	No
orf19.3115	757	539	623	803	838	778	800	496	679	686	637	662	717	742	714	700	692.17	666	718	1.08	0.111	1.918	0.0550585	0.0913072	1e-08	0.00407685	0.00175044	0.00175044	TRUE	0.00951367	No
orf19.3116	1374	905	1144	1354	1793	1444	1593	787	1233	1152	1170	1117	1533	1378	1421	1110	1264.31	1168	1360	1.168	0.224	2.609	0.00909062	0.0185141	0.00850744	0.00312774	0.00627911	0.00627911	TRUE	0.176068	No
orf19.3117	308	172	267	279	318	240	215	165	276	219	273	230	272	229	192	233	240.51	250	232	0.926	-0.112	-0.899	0.368662	0.45725	0.0133388	0.00801554	0.0106079	0.0106079	TRUE	0.168542	No
orf19.3120	62	38	56	67	40	29	41	26	56	48	57	55	34	28	37	37	43.96	54	34	0.619	-0.692	-3.325	0.000885051	0.00225027	1e-08	0.035003	0.0175896	0.0175896	TRUE	0.107998	No
orf19.3121	35	27	34	34	40	35	40	25	31	34	35	28	34	33	36	35	33.39	32	34	1.084	0.116	0.503	0.614767	0.688062	1e-08	0.0454512	0.0212474	0.0212474	TRUE	0.0599493	No
orf19.3122	1449	966	1247	1607	1464	1229	1344	875	1300	1230	1276	1325	1252	1173	1199	1234	1248.6	1283	1214	0.945	-0.082	-1.683	0.0922894	0.143053	1e-08	0.00314218	0.00145076	0.00145076	TRUE	0.00849917	No
orf19.3122.2	2247	1332	1569	2035	2489	1882	1914	1233	2016	1696	1605	1678	2129	1796	1708	1739	1795.78	1749	1843	1.054	0.076	0.877	0.380333	0.469786	0.00963691	0.00278792	0.00666228	0.00666228	TRUE	0.133609	No
orf19.3123	7624	5140	6574	8067	9063	7261	7977	5172	6840	6544	6726	6652	7751	6928	7118	7295	6981.66	6690	7273	1.087	0.12	2.881	0.00396513	0.00875826	0.00115306	0.00218745	0.00153209	0.00153209	TRUE	0.0244246	No
orf19.3123.2	333	191	252	333	308	242	253	182	299	243	258	275	263	231	226	257	256.39	269	244	0.904	-0.146	-1.47	0.141632	0.205587	0.00306134	0.00764168	0.00553727	0.00553727	TRUE	0.0636958	No
orf19.3124	7086	4630	6079	7804	6407	5283	5760	3975	6357	5894	6219	6435	5479	5041	5140	5606	5771.58	6226	5316	0.853	-0.229	-4.859	1.17746e-06	4.92287e-06	0.00178612	0.00223105	0.0019619	0.0019619	TRUE	0.0158214	No
orf19.3125	491	399	448	595	540	491	508	315	440	508	458	491	462	468	453	444	465.67	474	457	0.966	-0.049	-0.689	0.490979	0.576266	1e-08	0.00509698	0.0027644	0.0027644	TRUE	0.0276326	No
orf19.3126	5036	3373	4330	5348	5261	4631	5049	3184	4518	4294	4430	4410	4499	4419	4505	4491	4445.79	4413	4478	1.014	0.02	0.649	0.516416	0.600354	1e-08	0.00230606	0.000729173	0.000729173	TRUE	0.00374834	No
orf19.3127	1497	1004	1405	1706	2096	1679	2029	1234	1343	1278	1437	1407	1793	1602	1811	1740	1551.38	1366	1736	1.27	0.345	6.011	1.84851e-09	1.12979e-08	0.00219907	0.00291527	0.00249959	0.00249959	TRUE	0.0336741	No
orf19.3128	952	713	913	1023	1328	1207	1334	866	854	908	934	844	1136	1152	1190	1221	1029.83	885	1175	1.328	0.409	7.439	1.01746e-13	1.03258e-12	0.000670994	0.00338917	0.00191699	0.00191699	TRUE	0.0176029	No
orf19.3129	4723	2995	3955	4887	5692	4711	5196	3219	4237	3813	4046	4030	4868	4495	4637	4540	4333.24	4032	4635	1.149	0.201	4.519	6.21289e-06	2.33586e-05	0.00125885	0.00231454	0.00166459	0.00166459	TRUE	0.0156417	No
orf19.313	9	4	5	7	7	8	4	5	8	5	5	6	6	8	4	7	6.04	6	6	0.985	-0.022	-0.04	0.96827	NA	1e-08	0.242449	0.12487	0.12487	TRUE	0.213402	No
orf19.3130	6597	4431	5414	6894	6433	5721	5947	3831	5918	5641	5539	5685	5502	5459	5307	5403	5556.72	5696	5418	0.951	-0.073	-2.141	0.03226	0.0571342	0.000363663	0.00224077	0.000921424	0.000921424	TRUE	0.00854629	No
orf19.3131	1824	1189	1629	1981	2124	1851	1877	1326	1636	1514	1667	1634	1817	1766	1675	1870	1697.25	1613	1782	1.102	0.141	2.745	0.00606004	0.0128562	0.00117634	0.00283485	0.00192675	0.00192675	TRUE	0.0199385	No
orf19.3132	2558	1726	2232	2879	2856	2593	2639	1758	2295	2197	2284	2374	2443	2474	2355	2480	2362.61	2288	2438	1.064	0.089	2.179	0.0293032	0.0524594	0.000351368	0.00259397	0.00118675	0.00118675	TRUE	0.00801507	No
orf19.3133	22457	15120	20006	24737	20477	17515	18699	12784	20146	19249	20468	20398	17513	16712	16686	18031	18650.4	20065	17236	0.859	-0.22	-5.755	8.64732e-09	4.8194e-08	0.00104052	0.00205736	0.00134733	0.00134733	TRUE	0.0116168	No
orf19.3134	4	12	7	3	4	4	5	5	4	15	7	2	3	4	4	7	5.91	7	4	0.669	-0.58	-0.873	0.382518	NA	0.231248	0.247757	0.240862	0.240862	TRUE	0.88921	No
orf19.3135	2284	1635	1973	2371	2420	2263	2402	1513	2049	2082	2019	1955	2070	2159	2143	2134	2076.32	2026	2126	1.05	0.071	1.759	0.0786352	0.124622	1e-08	0.00267869	0.0010735	0.0010735	TRUE	0.00701496	No
orf19.3136	5240	3640	4658	5533	6056	5488	5859	3512	4701	4634	4766	4563	5179	5236	5228	4953	4907.55	4666	5149	1.105	0.144	4.227	2.36696e-05	8.13075e-05	0.00023639	0.00227533	0.00090211	0.00090211	TRUE	0.00745489	No
orf19.3138	26230	15294	22232	27285	24277	17839	20810	13803	23531	19471	22746	22500	20762	17021	18569	19468	20508.5	22062	18955	0.859	-0.219	-3.084	0.00204473	0.00481943	0.00663877	0.00205031	0.00480127	0.00480127	TRUE	0.0763007	No
orf19.3139	3202	2025	2705	3247	3333	2802	2991	1875	2873	2578	2767	2678	2850	2674	2669	2645	2716.64	2724	2710	0.995	-0.008	-0.166	0.868239	0.89922	0.00129313	0.0025139	0.00174899	0.00174899	TRUE	0.016451	No
orf19.314	698	483	670	703	922	850	954	592	626	615	685	580	789	811	851	835	724.01	626	822	1.312	0.391	5.96	2.52005e-09	1.51102e-08	0.00157637	0.00398461	0.00273	0.00273	TRUE	0.0475159	No
orf19.3140	24	13	14	27	23	19	18	18	22	17	14	22	20	18	16	25	19.24	19	20	1.032	0.045	0.143	0.886054	0.913734	1e-08	0.0774329	0.0441862	0.0441862	TRUE	0.133595	No
orf19.3140.1	4797	2891	3668	4705	4355	3321	3793	2510	4303	3681	3753	3880	3725	3169	3385	3540	3679.32	3904	3455	0.884	-0.177	-2.766	0.005674	0.0121056	0.00451222	0.00237408	0.00366854	0.00366854	TRUE	0.0579208	No
orf19.3141	3683	2477	3344	3963	5012	4268	4808	3249	3304	3153	3421	3268	4286	4072	4290	4582	3797.28	3286	4308	1.309	0.389	8.461	2.65408e-17	3.86715e-16	0.00138742	0.00236182	0.00175668	0.00175668	TRUE	0.0213938	No
orf19.3142	503	394	473	605	646	610	614	442	451	502	484	499	552	582	548	623	530.19	484	576	1.188	0.248	3.522	0.000428609	0.00117316	0.000936772	0.00471763	0.00287614	0.00287614	TRUE	0.0306236	No
orf19.3147	491	452	479	640	571	795	858	425	440	575	490	528	488	759	766	599	580.71	508	653	1.286	0.363	2.695	0.00703268	0.0146709	0.0272309	0.00447939	0.0156934	0.0156934	TRUE	0.351753	No
orf19.3148	568	442	526	650	731	682	788	429	510	563	538	536	625	651	703	605	591.32	537	646	1.209	0.274	3.977	6.98466e-05	0.000219706	0.00132962	0.00443454	0.0028478	0.0028478	TRUE	0.0424276	No
orf19.3149	7901	5722	6921	8338	7794	7369	7374	4847	7088	7285	7081	6876	6666	7031	6580	6836	6930.31	7082	6778	0.957	-0.063	-1.783	0.0746068	0.118959	0.000518583	0.00218899	0.00105652	0.00105652	TRUE	0.00791489	No
orf19.315	87	56	77	93	93	66	66	59	78	71	79	77	80	63	59	83	73.68	76	71	0.924	-0.114	-0.679	0.49691	0.581843	1e-08	0.0216827	0.0134853	0.0134853	TRUE	0.127803	No
orf19.3150	2320	1772	2095	2483	2578	2455	2396	1612	2081	2256	2143	2048	2205	2342	2138	2274	2185.88	2132	2240	1.051	0.072	1.498	0.134249	0.196484	0.00108678	0.00264365	0.00176983	0.00176983	TRUE	0.017675	No
orf19.3151	447	416	438	558	421	450	402	259	401	530	448	460	360	429	359	365	419.04	460	378	0.826	-0.276	-2.821	0.0047935	0.0103931	0.00806729	0.00544388	0.00676041	0.00676041	TRUE	0.113159	No
orf19.3152	2076	1566	1879	2392	1455	1354	1331	860	1862	1994	1922	1972	1244	1292	1188	1213	1585.99	1938	1234	0.638	-0.649	-13.746	5.41872e-43	3.92237e-41	0.000481693	0.00289485	0.00147707	0.00147707	TRUE	0.0120683	No
orf19.3153	6630	4867	5911	7403	6349	6114	6861	3927	5948	6196	6048	6105	5430	5834	6122	5539	5902.6	6074	5731	0.944	-0.083	-1.877	0.0605755	0.0993279	0.00139909	0.00222547	0.00171537	0.00171537	TRUE	0.0260438	No
orf19.3154	1536	1232	1363	1751	1949	1996	2060	1221	1378	1568	1394	1444	1667	1905	1838	1722	1614.56	1446	1783	1.235	0.304	5.029	4.9414e-07	2.19099e-06	0.00277692	0.00287865	0.00288937	0.00288937	TRUE	0.0368668	No
orf19.3156	1911	1268	1718	2117	1810	1628	1779	1091	1714	1614	1758	1746	1548	1553	1587	1539	1632.45	1708	1557	0.911	-0.135	-3.042	0.0023481	0.0054574	0.000103241	0.0028688	0.00127562	0.00127562	TRUE	0.0150128	No
orf19.3158	1860	1259	1601	1957	2542	2333	2520	1614	1669	1603	1638	1614	2174	2226	2249	2276	1931.04	1631	2231	1.366	0.45	11.339	8.37364e-30	2.97686e-28	1e-08	0.00273129	0.000984572	0.000984572	TRUE	0.00370824	No
orf19.3159	4345	3791	4332	5284	3380	3547	3504	2001	3898	4826	4432	4357	2891	3384	3127	2822	3717.21	4378	3056	0.699	-0.517	-7.014	2.3183e-12	2.04228e-11	0.0068874	0.00237006	0.00494745	0.00494745	TRUE	0.0666037	No
orf19.3159.4	2	1	4	1	0	2	1	0	2	1	4	1	0	2	1	0	1.35	2	1	0.369	-1.438	-1.104	0.269668	NA	1e-08	1.07881	0.698524	0.698524	TRUE	0.44959	No
orf19.316	1015	649	854	1023	1212	939	1062	724	911	826	874	844	1037	896	948	1021	919.43	864	976	1.127	0.173	2.713	0.00666689	0.0140247	0.00219343	0.00355844	0.00280618	0.00280618	TRUE	0.0360819	No
orf19.3160	1424	894	1130	1428	2415	1873	1853	1233	1277	1138	1156	1178	2065	1787	1653	1739	1499.29	1187	1811	1.526	0.609	8.325	8.41133e-17	1.1671e-15	0.00528342	0.00294778	0.00444412	0.00444412	TRUE	0.110191	No
orf19.3161	6031	4011	4990	6430	6650	5573	5989	3475	5410	5106	5105	5302	5687	5318	5344	4901	5271.83	5231	5312	1.016	0.023	0.473	0.636549	0.707303	0.00182506	0.00225489	0.00211246	0.00211246	TRUE	0.0320816	No
orf19.3163	854	601	748	858	831	704	790	484	766	765	765	708	711	672	705	683	721.76	751	693	0.924	-0.113	-1.937	0.0526879	0.0880035	1e-08	0.00399086	0.00190607	0.00190607	TRUE	0.0195633	No
orf19.3166	680	484	602	748	619	578	599	385	610	616	616	617	529	552	535	543	577.17	615	540	0.877	-0.189	-3.15	0.00163125	0.0039171	1e-08	0.00449474	0.00171636	0.00171636	TRUE	0.00287983	No
orf19.3167	3692	2368	3154	3960	3675	2737	3090	2226	3312	3015	3227	3265	3143	2612	2757	3140	3058.82	3205	2913	0.908	-0.139	-2.115	0.0344358	0.0606006	0.00471224	0.00245412	0.00383604	0.00383604	TRUE	0.0588911	No
orf19.3168	7241	4758	6270	7419	6312	5632	6024	3595	6496	6057	6415	6118	5398	5374	5375	5070	5787.99	6272	5304	0.846	-0.241	-6.18	6.4028e-10	4.1813e-09	0.000797649	0.00223034	0.00128392	0.00128392	TRUE	0.0102266	No
orf19.3169	7805	5265	6484	8345	7882	6592	7370	4604	7002	6703	6634	6881	6741	6290	6576	6494	6665.1	6805	6525	0.959	-0.061	-1.703	0.0884786	0.137894	0.000516611	0.00219733	0.00106889	0.00106889	TRUE	0.00737622	No
orf19.317	876	522	716	836	1105	914	1027	634	786	665	733	689	945	872	916	894	812.51	718	907	1.262	0.335	5.172	2.31753e-07	1.07835e-06	0.00191847	0.0037662	0.00279238	0.00279238	TRUE	0.0487447	No
orf19.3170	3100	2221	2846	3277	2908	2698	2999	1721	2781	2828	2912	2702	2487	2574	2676	2427	2673.42	2806	2541	0.907	-0.141	-3.128	0.00175896	0.00420359	0.000896302	0.00252254	0.00156424	0.00156424	TRUE	0.0155543	No
orf19.3171	6861	4751	6153	7241	9767	8394	8929	6676	6155	6049	6295	5971	8353	8009	7968	9416	7276.95	6118	8436	1.378	0.463	8.357	6.43881e-17	9.06081e-16	0.00328016	0.00217902	0.00280556	0.00280556	TRUE	0.0734835	No
orf19.3172	16	7	15	12	13	7	16	14	14	9	15	10	11	7	14	20	12.54	12	13	1.036	0.051	0.121	0.903323	NA	0.0363564	0.117736	0.0871093	0.0871093	TRUE	0.228812	No
orf19.3173	722	435	530	643	613	494	531	295	648	554	542	530	524	471	474	416	519.94	568	471	0.832	-0.265	-2.96	0.00307378	0.0069609	0.00626726	0.00477159	0.00576259	0.00576259	TRUE	0.106973	No
orf19.3174	1034	738	965	1110	1202	1102	1231	811	928	940	987	915	1028	1051	1098	1144	1011.44	942	1080	1.145	0.195	3.54	0.000399453	0.00110037	0.000660129	0.0034148	0.00191073	0.00191073	TRUE	0.0165066	No
orf19.3175	4602	3027	4010	4739	6107	5247	5637	3617	4128	3854	4103	3908	5223	5007	5030	5101	4544.2	3998	5090	1.273	0.348	9.343	9.40196e-21	1.8047e-19	0.00047815	0.00229899	0.00110737	0.00110737	TRUE	0.00676908	No
orf19.3176	1670	1132	1488	1775	2033	1734	1920	1278	1498	1441	1522	1464	1739	1655	1713	1803	1604.3	1481	1728	1.164	0.219	4.846	1.26242e-06	5.2416e-06	0.000194128	0.00288441	0.0013331	0.0013331	TRUE	0.00940762	No
orf19.3177	623	424	546	585	509	444	477	258	559	540	559	482	435	424	426	364	473.52	535	412	0.775	-0.367	-4.548	5.40828e-06	2.05003e-05	0.00312431	0.00504526	0.00410294	0.00410294	TRUE	0.0606434	No
orf19.3178	2560	1892	2216	2694	2878	2583	2843	1554	2297	2409	2267	2222	2461	2465	2537	2192	2356.08	2299	2414	1.053	0.074	1.399	0.161749	0.229901	0.0020174	0.00259567	0.00226684	0.00226684	TRUE	0.0435127	No
orf19.318	981	678	856	1098	1006	908	944	576	880	863	876	905	860	866	842	812	863.24	881	845	0.96	-0.059	-1.117	0.263835	0.347538	1e-08	0.00366121	0.00148327	0.00148327	TRUE	0.00684524	No
orf19.3180	1006	755	873	1094	1346	1152	1249	778	902	961	893	902	1151	1099	1115	1097	1015.14	914	1116	1.223	0.29	5.738	9.57206e-09	5.31015e-08	1e-08	0.00340957	0.00146041	0.00146041	TRUE	0.0123394	No
orf19.3181.1	420	316	370	432	424	318	357	209	377	402	379	356	363	303	319	295	349.16	378	320	0.851	-0.232	-2.658	0.00786275	0.0162502	0.00259885	0.00613727	0.00446087	0.00446087	TRUE	0.0960205	No
[truncated: 4,462 more rows]

## Sheet: S1B Data
Wild type doxycycline-treated up-regulated genes
Gene ID	WT1	WT2	WT3	WT4	WTdox1	WTdox2	WTdox3	Wtdox4	norm.WT1	norm.WT2	norm.WT3	norm.WT4	norm.WTdox1	norm.WTdox2	norm.WTdox3	norm.Wtdox4	baseMean	WT	WTdox	FC	log2FoldChange	stat	pvalue	padj	dispGeneEst	dispFit	dispMAP	dispersion	betaConv	maxCooks	outlier
orf19.7453	21	14	18	27	65	56	70	42	19	18	18	22	56	53	62	59	38.51	19	58	2.955	1.563	6.62	3.59728e-11	2.78493e-10	1e-08	0.0396778	0.0195964	0.0195964	TRUE	0.0674984	No

## Sheet: S1C Data
Wild type doxycycline-treated down-regulated genes
Gene ID	WT1	WT2	WT3	WT4	WTdox1	WTdox2	WTdox3	Wtdox4	norm.WT1	norm.WT2	norm.WT3	norm.WT4	norm.WTdox1	norm.WTdox2	norm.WTdox3	norm.Wtdox4	baseMean	WT	WTdox	FC	log2FoldChange	stat	pvalue	padj	dispGeneEst	dispFit	dispMAP	dispersion	betaConv	maxCooks	outlier
[truncated: 14 more rows]

## Sheet: S1D Data
PTET-ZCF15 doxycycline-treated complete data
[truncated: 6,462 more rows]

## Sheet: S1E Data
PTET-ZCF26 doxycycline-treated complete data
[truncated: 6,462 more rows]

[truncated: 7 more sheets: S1F Data, S1G Data, S1H Data, S1I Data, S1J Data, S1K Data, S1L Data]
