# Supplementary material for: Metabolic reprogramming during Candida albicans planktonic-biofilm transition is modulated by the transcription factors Zcf15 and Zcf26
Source: PLOS journal article supplement (doi:10.1371/journal.pbio.3002693), 2024-06-21
Supplement: S21 (10.1371/journal.pbio.3002693.s021) [file journal.pbio.3002693.s021.xlsx]

## Sheet: S2D Fig
Aligned amino acid sequences used to construct evolutionary history of Zcf15, Zcf25 and Zcf26 (Data linked to Figure S2D)
Species	Amino acid sequences
#C. tropicalis Zcf15	-----------------MEIDFDKRTKVSKACDYCKQRKYKCTGISPCELCTRKGVECKFSIVDKRTLRRTSKRRKTKQDMKIDSDAQDDKVIIPNISKPSK------------DNDDID---------VDDLKLLSKKSKIPLQFQPIIRFPLHKVEVQPNTDQSSTPVASDSSTLAPPPAAPA------------------------------------------------------AAAPPPLQQSKGNSETREPQKVLYDSHGNLRYVGESSPLSFLFECRNIFQERLGPTQFSLEN-ESLDVICDPEEYPEAI-KIPLPDRELVEDLFELFCINLVQASYFIDINYFKTYTINAIYQDFN--QCSPGQIAITNLIVGNGLLFAELSNHPILQRL…
#S.passalidarum Zcf26	-----------------------KRTKVSRACDYCKKRKFKCSGKSPCNLCTKKKLECVFSIIDRRTIRRKNKKRK-----IKKEVVKP----------------------------VID---------NQTLNLLTQKANIPSHYQPLLIFPLHNGINNANDITGG---------------------------------------------------------------------------------HKLMVKPEDPPKLIFDSQGNLRYFGETSPLSLLFECRAIFKDKLGESEFTTQ--GTCPIVDEPEESEDVVAPPPLPTRETFNRIFEVFLININQVCYVFDTNYFTKNTVEFVYADPTCANCPRDKISLINLVIGVGLKYAELCQDPIVAEF…
#C. orthopsilosis Zcf15	--------------------DLDKRTKVSRACDYCKKRKFKCSGKAPCDLCSKKKIDCTFSIVDRRTIRRKNKKRK--VKAEKDATLDATAGTPSKLTTQAK-----EFVHKVVKTEQVD---------KKSLNMLKKPSQLPIHFQPLTMFPVVGKSDESDESQGKKLEIEEGELSDEDESVESSSEESESEHNEKNNDEAAPAKKTQNSPNA-------------------------RSKFPDAQHGPSWAEDSESHRVLFDGEGNLKYVGESAPLSFLFECRSVFSKTIGKSEFTEER-ESLEIFDDAEEVREVV-QMALPNRSNLRRILRLFYININEACYVFDIKHFEKTVIVPIYNNYS--ECSVDQISLMNLMIGVGLLYAEIIGDPICQNM…
#C. parasilosis Zcf15	--------------------DTDKRTKVSRACDYCKKRKFKCSGRAPCDLCSKKKMECTFSIVDRRTIRRKNKKRR-----TKAEDSSLNAGTYQPVTTTSSTSHAKEFVHKVVKNDQVD---------RKSLNMLNKSSQLPIHFQPLTMFPVTGKSDESDGSFEKKSELEEGESIEEDDDESGVSSSVEESDGEGVVKDNTETNATESTKKPQSTSNSHSQPHSHSHSHSHSHSHS-HSKTHNTHKTHSWAEEAESHRVLFDAEGNLKYVGESAPLSFLFECRSIFAKTIGKSEFTEEP-DSLEIFDDTDEVQEVV-QMALPSRENLKRILRLFLINVNEACYLFDIKHFEKTVITPIYNNYG--DCSVDQISLMNLMIGVGLLYAEIIGDPICQNM…
#C. elongisporus Zcf26	------------------------------------------------------------------------------------------------------------------------------------------------------------------------------------------------------------------------------------------------------------------PRALYDSGGNLRYVGESSPLSFLFECRNIFKQLIGESSFTIEL-DSFEVFDEADDFQEIV-QVPLPNRETLKHILEIFSVNVNVNCYIFDPKLYEKNIIVPIYTNYA--ACSIDQIAIINLTIGVGLLYAEIAKHPIIYKL…
#C.albicans Zcf15	-----------------MDADLEKRTKVSRACDYCKKRKFKCSGVSPCELCTKKNIQCEFSIIDRRTIRRKNKKRT-----IRNKPITNTVIGSHKISKNDD------------DNDQID---------KQTLKLLTKKSKVPEQLQPLLTFPLHKLDNKSNEEEEEQGGDNDHERSEEGEHQHNDQSLPPGSSSESHNRQKVDIQGNESHGTSDGDLTINATGFDI-TTTSNDRVHKVNQQSSPMPKKIVIARERYPPKVLYDGEGNLRYFGESSPLSFLFQCRNVFVDKIGDSNFTLESNDSLEVIEDSDESYEII-QVALPSRQILDDIIKIFYMNIQQAVYFVNIDFFKSQIINPVYENYS--DCTPGKIALVNLAIAVGLLYAENTNDPLVNLL…
#C. dubliniensis Zcf15	-----------------MDVDLEKRTKVSRACDYCKKRKFKCSGVSPCELCTKKNIQCEFSIIDRRTIRRKNKKRT-----VRK-PVTNTIIGSHKISKDND------------DNDQID---------KQTLKLLTKKSNVPEQLQPLLTFPLHKLDNKLNEEEPE--EDNDQEKNEEREHPQSNISLPSGSNSGSYNPRNPNHDGKESNKSKGRVFTTNATGFNIATTTTDERAGGGNQQSSSMPKKIIITRERYPPKVLYDGEGNLRYFGESSPLSFLFQCRSVFVDKIGDSNFTLENNDSLEVIEDSDESYEVI-QVALPSRQILDDIIKIFYRNIQQAVYFVNIDFFKTQVIDPVYENYS--DCTPGKIALVNLVIAVGLLYAENTNDPLVNLL…
#C. tropicalis Zcf26	-----------------MDVDLEKRTKVSRACDYCKKRKFKCSGVAPCELCTKKGIECEFSIIDRRTIRRKNKKRT-----VRNKPSSSAITKNGK------------------DDDSID---------KKTLKMLTKKSKIPSQYEPLLTFPLHKLDNNSTKTTTENINGESKTISSSGTTGNSVGTKPVESNGKQEEQSQVE-----------------------------------DANDEAITKKIVMEEERDPPKVLYDSEGNLRYVGESSPLSFLFECRNIFLERLGPSKFTSET-DCLEVIDEPDESMEIL-QVALPSKHLSDEIVKIFYTNIQQACYFFEAEYFVNNIINPVYTNYS--ECTPDKIALVNLVISLGLLFAEANNNPILKEL…
#C. albicans Zcf26	-----------------MDVDLDKRTKVSRACDYCKKRKFKCSGVSPCELCTKKGIQCEFNIVDRRTIRRKNKKRT-----IRNKPATATSSTTSKIKK---------------DENQID---------KTTLKMLTRNSKVPVQLQPLLSFPLHKLDNKQNEEEKHTQQSPPAADDTPDDERKDK-----------------------------------------------------DRKIDKKTHPDPPKNERAPPKVLYDSEGNLRYVGESSPLSFLFECRNIFLDRIGESDFTSES-DSLEVIDEPDESTEIV-QVALPSRQLLNEIVRIFYMNIQQATYFVNVEYFKENSINPVYENYS--GCDPEKIALVNLVIAIGLLHAEATNDPVLSQL…
#C. dubliniensis Zcf26	-----------------MDIDLDKRTKVSRACDYCKKRKFKCSGVSPCELCTKKGIQCEFSIVDRRTIRRKNKKRT-----IRNKPATATSSTGSKIKK---------------DENQID---------KRTLKMLTRNSKVPVQLQPLLSFPLHKLDNKQNEDEEQALQNPPTTDINSGNEDTLHNARKDD-----------------------------------------------HRKNIKETHSKPENNERDPPKVLYDSEGNLRYVGESSPLSFLFECRNIFLDRIGESTFTSES-DLLEVIDEPDESTEIV-QVALPNRQLLNEIVRIFYKNIQQATYFVNVEYFKENSIDPVYENYS--GCDAEKIALVNLVIAIGLLYAEGTNDPVLSQL…
#D. hansenii Zcf25	------------------------------------------MGFPEH---SPGSIQNDYGI---QKLEGPGRRSS---MASKNGNHHNSVGQA--------------------SSTVIQ---------NNARSIPQNSRYLPRNLEPLLSFPIEEENQNNGHDRDSVDRSFRNMHQEN------------------------------------------------------------AADDDMEDEYGLSNEDGKNTRLLRDSGGNLRYIGESSPLSLLFECRNIFYKTLGHTKFTDDP-RRMSIVDQPGKLLSGI-AIQLPTREECDILVSVFEENINHTFYVFNSNYLRHEIVDYIYKSPN--RAPHNKLALLHLVLALGSLFADICPDYSIKEL…
# Sch. Stipites Zcf25	MEILMEPKRKKTPIIISSVLEPERRKKVTKACDYCKKRKYKCSGKSPCYLCEKKKIECKFSIVDKRTTKVKKKKGG----ISKSTNSHPDGIAASSSEIAADALVQSNSYVDSAPDGSSS---------KDNLGSKPKAAYIPKSLQPLLSFPLGEDGETVSDDEGGYSKPMDDDEDMPEEDQNGIESRESLRDEHEVLNKTTQRSKE-------------------------------SDHRRTEKPTGLSNNYGKSSRLLFDSAGNLRYIGESSPLSLLFECRNIFLSTIGSCEFTSDP-QGVNIIDEPGKIKNGI-PVQLPKREHCNILVKFFESNVNSTWYVFNMRYFKEYIVDYIYDNPI--RARPEKLVLLHLVLALGLLYAETSKSFLIEDL…
#S. passalidarum Zcf25	---------------MTQFVTIEPRKKVTKACDYCKKRKYKCSGVAPCDLCTKKKIPCQFSIVDRRTTKGNQARDK--NDRQRRESSSSTVTAVSVMSTNTPAQRQNSKPDIPLDDQLIQ---------HNKLIATKMSGYIPKSLQPLLSFPLEKDKDGSSLSSTNDEDDEEEEEEDEED-------------------------------------------------------------------EGLSNDSGKSTRLLFDTAGNLRYIGESSPLSLLFESRNIFTSTIGESEFTGDP-QGVNIIDGTARINVVP-PMQLPRRDHCNVMIKFFENNINQTWYIFDMKDFKLNIVDYIYENPI--RAPVEKLSLLHLVFSLGLLFAEKANSYLVEEM…
#C. tropicalis Zcf25	---------------------MERRTKVSRACDYCKKRKYKCSGVPPCNLCLKKQIDCIFSIVDRRTTKGSKIQKP--------------------------------------------------------------TEYIPKNLQPLLSFPVDDQTQSVDTATTNGGSLQPQSQQVLAAAAA-------------------------------------------------------PPPPPQQQQQPNGPHHGKNLRLLYDKDGRLRYVGESSPLSLLFESRKIFLSVRGESEFTNDP-DTVNIIDSGAHVKNSK-ILQLPKKEDAMTLIDIFDSNINQTWYIYNRLWLSGK-LNEAYDDPL--KVSSERMAAFHLIFALGLFFAEKLNLPIAQSI…
#C. albicans Zcf15	---------------MDIETTKERRRKVSRACDYCKKRKYKCSGIAPCNLCSKKQIDCIFSIVDKRTTKGSKVYKPSSIEILSHNNLAQRNSLITDDIQNKINKQSQDPVPKTRSEQEIRLSNSHSET-LKDNSATNTTEYIPKNLQPLLSFPLKKEEEDDTSDGDTSISQDGKQKSETISTTNNTPTNRSNT----------------------------------------------NSTNSNVTTQGLSNSNGNNLRLLYDKDGRLRYIGESSPLSLFYEARKIFRSIRGVSEFTDDP-DTVNIIDGISHVKQSR-VLQMPKREHALLLLNLFEANINQTWYIYNREWLSDQFIK-VIDDPL--NISPERMAAFHLIFSLGLLFAEKSKHGIVEKI…
#C. dubliniensis Zcf25	---------------MNIHAAKERRTKVSRACDFCKRRKYKCSGVPPCNLCSKKQIDCVFSIVDKRTTKGSKIYKPSSIEVLSHNNLTIQNSYINENTQRRINKQSSTQVPIARPQQETTASKSPTETFLENNSSTNATEYIPKNLQPLLSFPLKKEEDDQSSEDTSVVEVDKQKSD-RTSTANNTPTNRSNTS----------------------------------------------STNSNVTTQGLTNNNGNNLRLLYDKDGRLRYIGESSPLSLSYQARKIFRSIRGESEFTDDP-DTVNIIDGVSHVRPCK-VLQMPKKEYALLLLNLFEANINQTWYIYNREWLNDKFVK-VIDDPL--NVAPERMATFHLIFSLGLLFAEKSKNGIVEKI…
